# Supplementary material for: Adult Human, but Not Rodent, Spermatogonial Stem Cells Retain States with a Foetal-like Signature
Source: MDPI journal article supplement (doi:10.3390/cells13090742), 2024-04-24

## EGR4

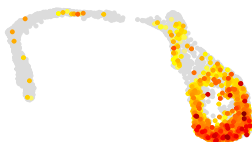

# PIWIL4

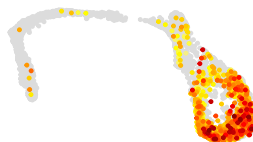

# UTF1

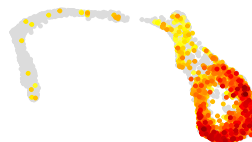

# TCF3

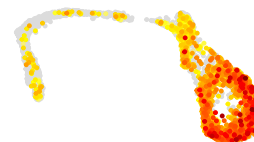

# TSPAN33

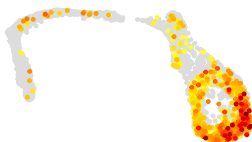

# FGFR3

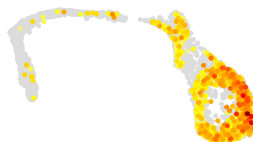

ID4

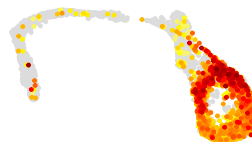

# GPX1

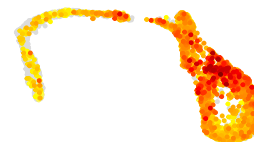

# GFRA1

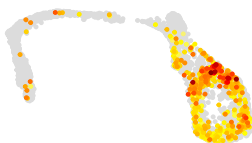

# NANOS3

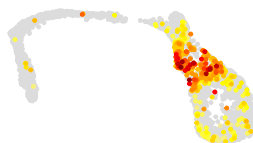

# NANOS2

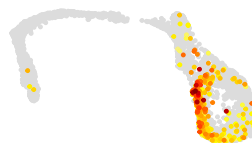

# MAGEA4

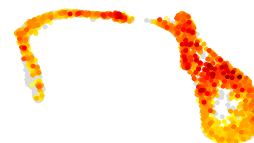

# KIT

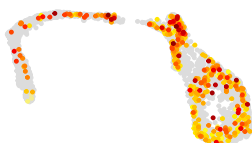

# MKI67

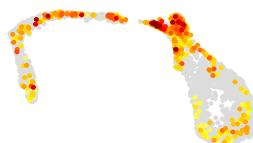

# DMRT1

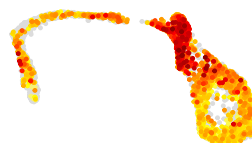

# STRA8

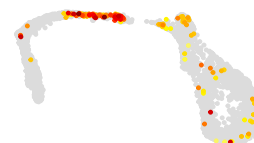

## MEIOSIN

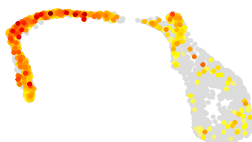

# TKTL1

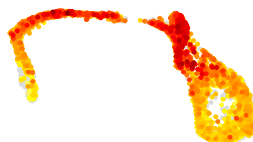

## SYCP3

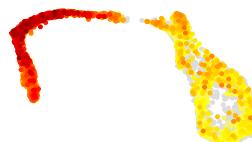

# SPO11

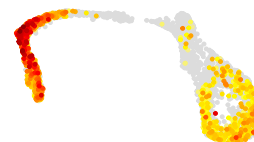

Supplement: s1 [file s1]
