# Supplementary material for: Adult Human, but Not Rodent, Spermatogonial Stem Cells Retain States with a Foetal-like Signature
Source: MDPI journal article supplement (doi:10.3390/cells13090742), 2024-04-24
Supplement: s1 [file s1]

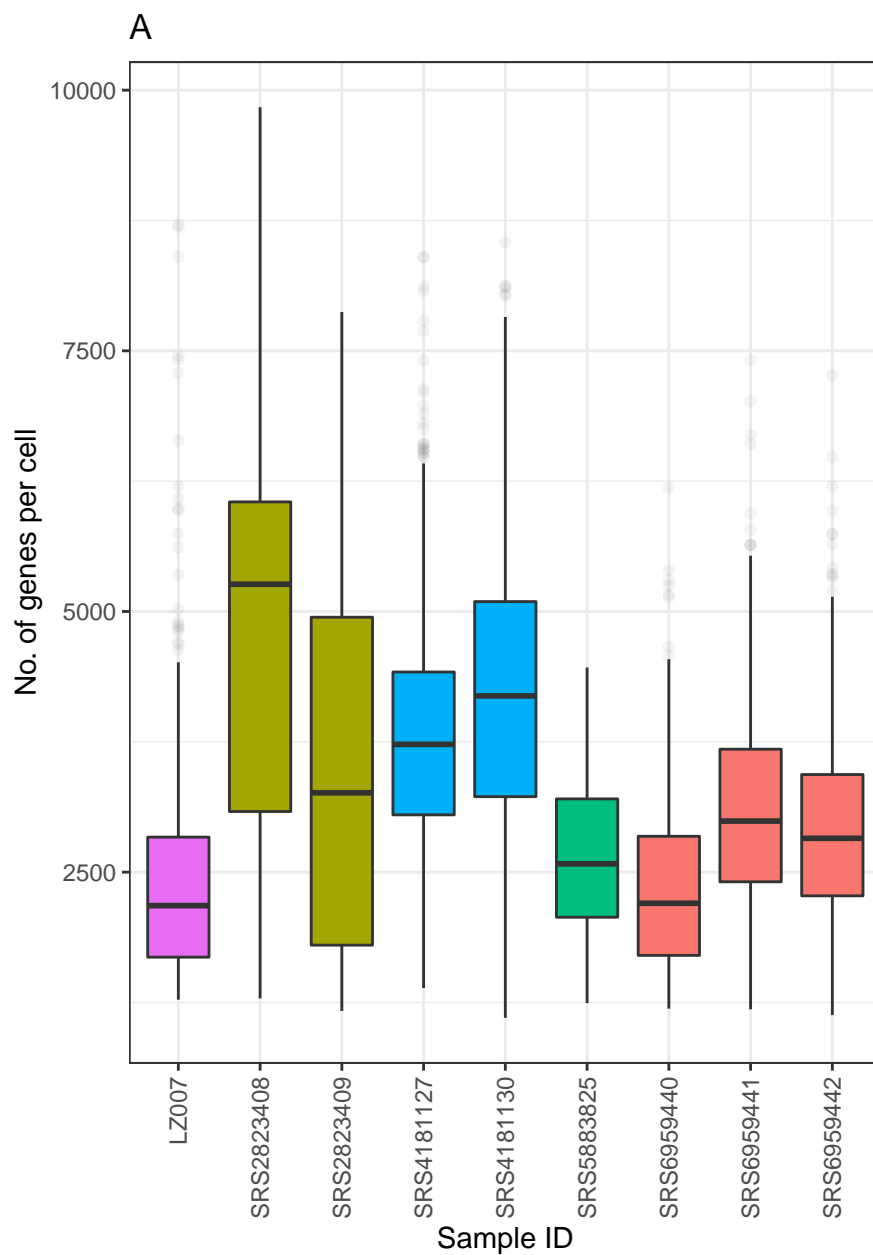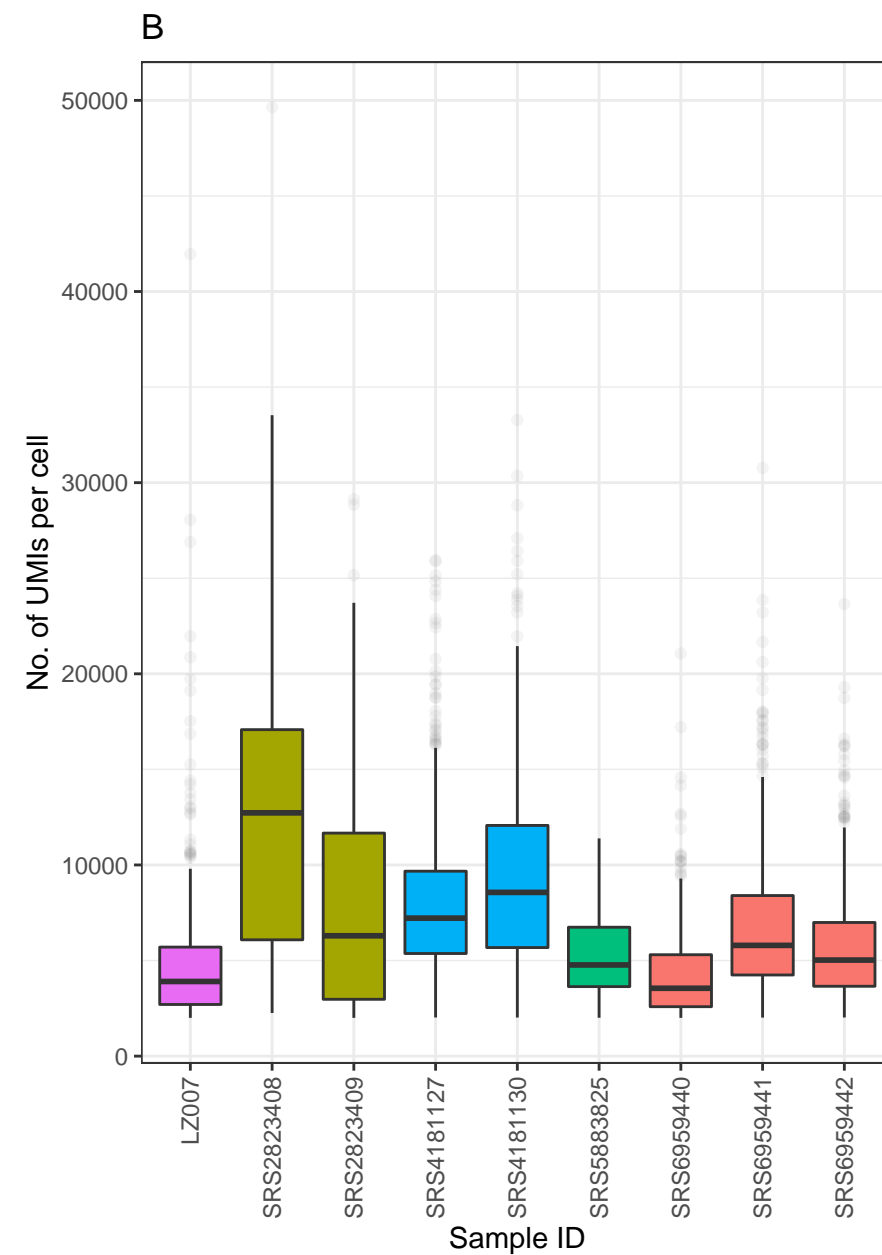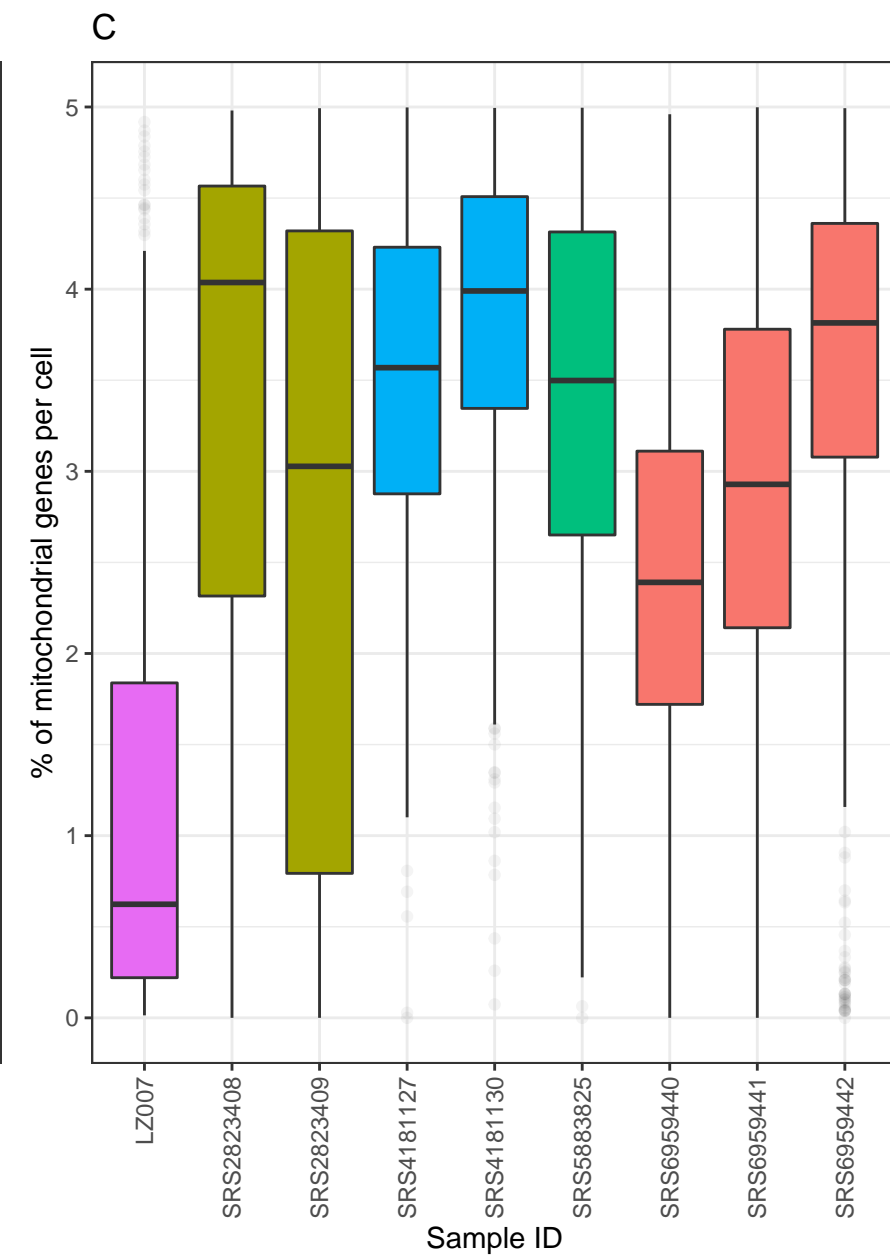

source Di Persio 2021 Hermann 2018 Shami 2020 Sohni 2019 Zhao 2020
