# Supplementary material for: Adult Human, but Not Rodent, Spermatogonial Stem Cells Retain States with a Foetal-like Signature
Source: MDPI journal article supplement (doi:10.3390/cells13090742), 2024-04-24
Supplement: s1 [file s1]

Reference

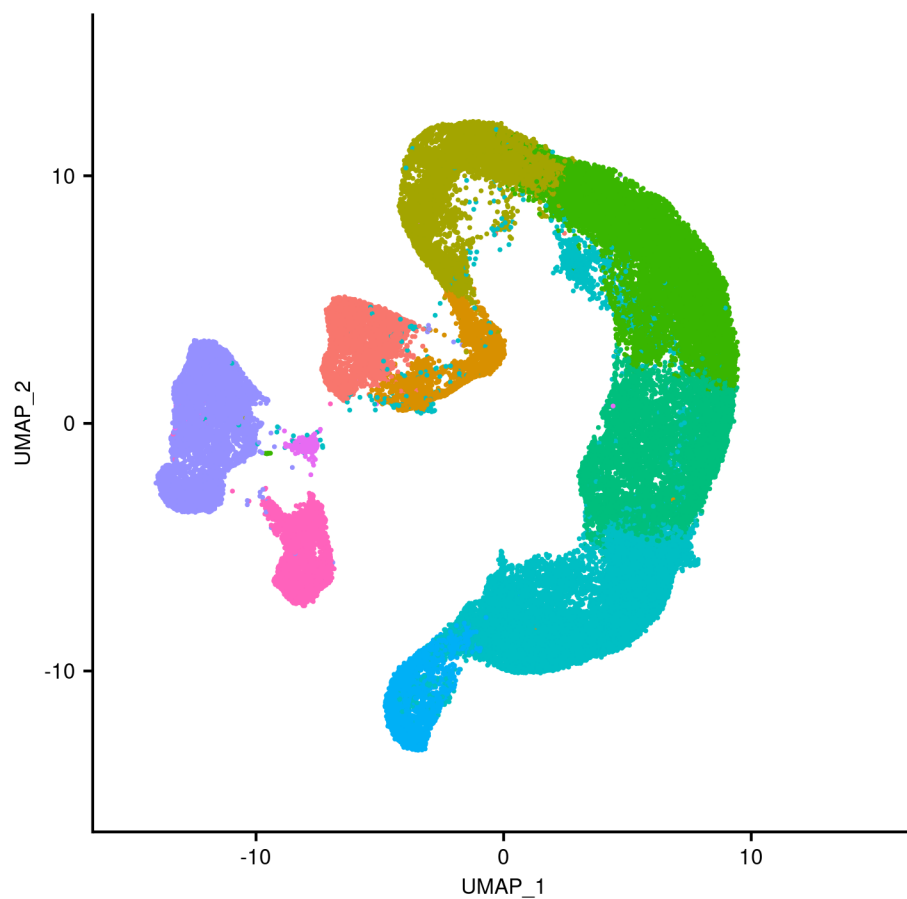

SPG atlas

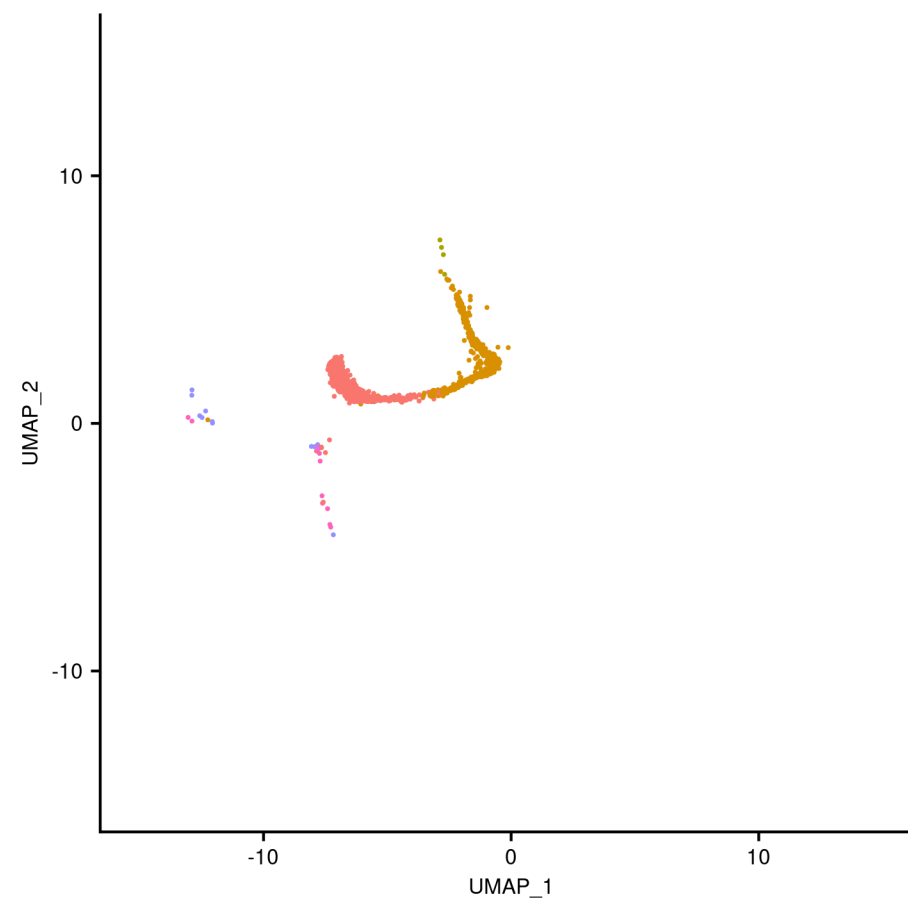

- undiff SPG
- diff SPG/early meiosis
- spermatocytes
- early spermatids (1)
- early spermatids (2)
- late spermatids (1)
- late spermatids (2)
- myoid & Leydig cells
- Sertoli cells
- endothelia & macrophages

Reference

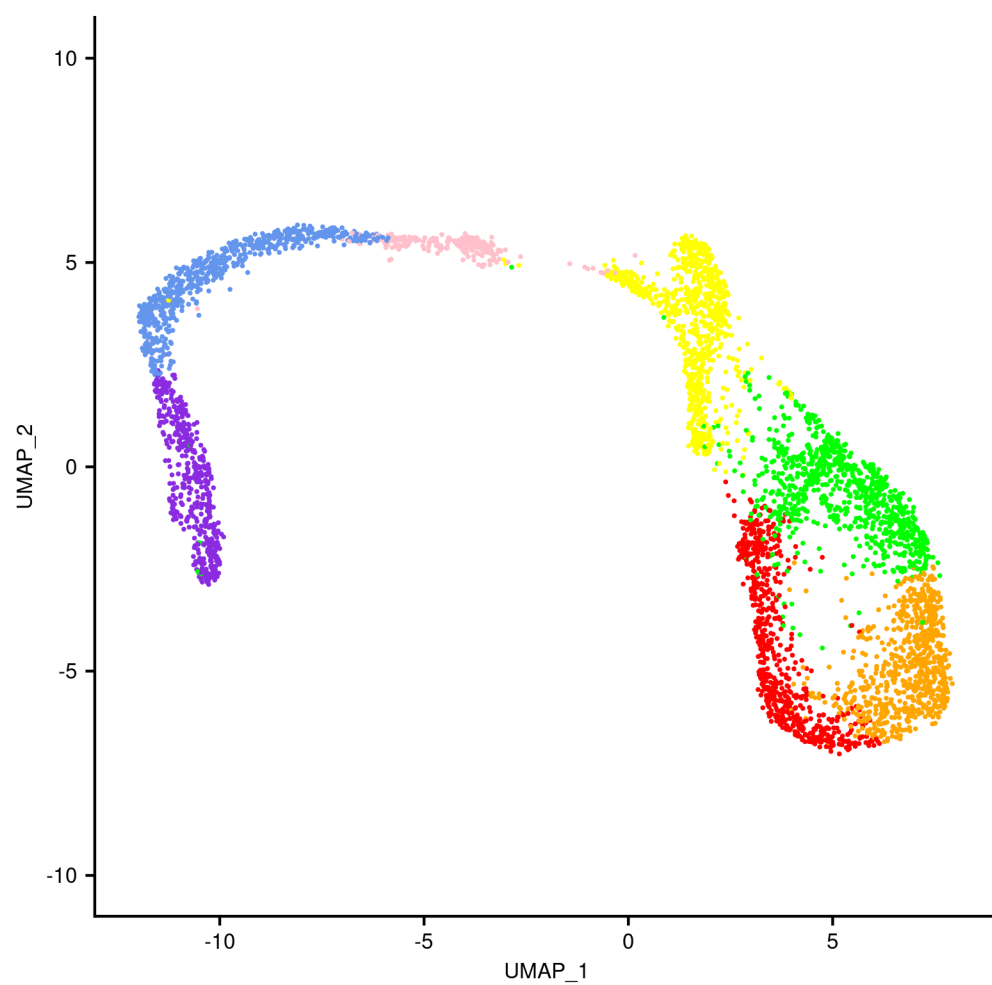'undiff SPG' and 'diff SPG/early meiosis' clusters  
from adult whole testis atlas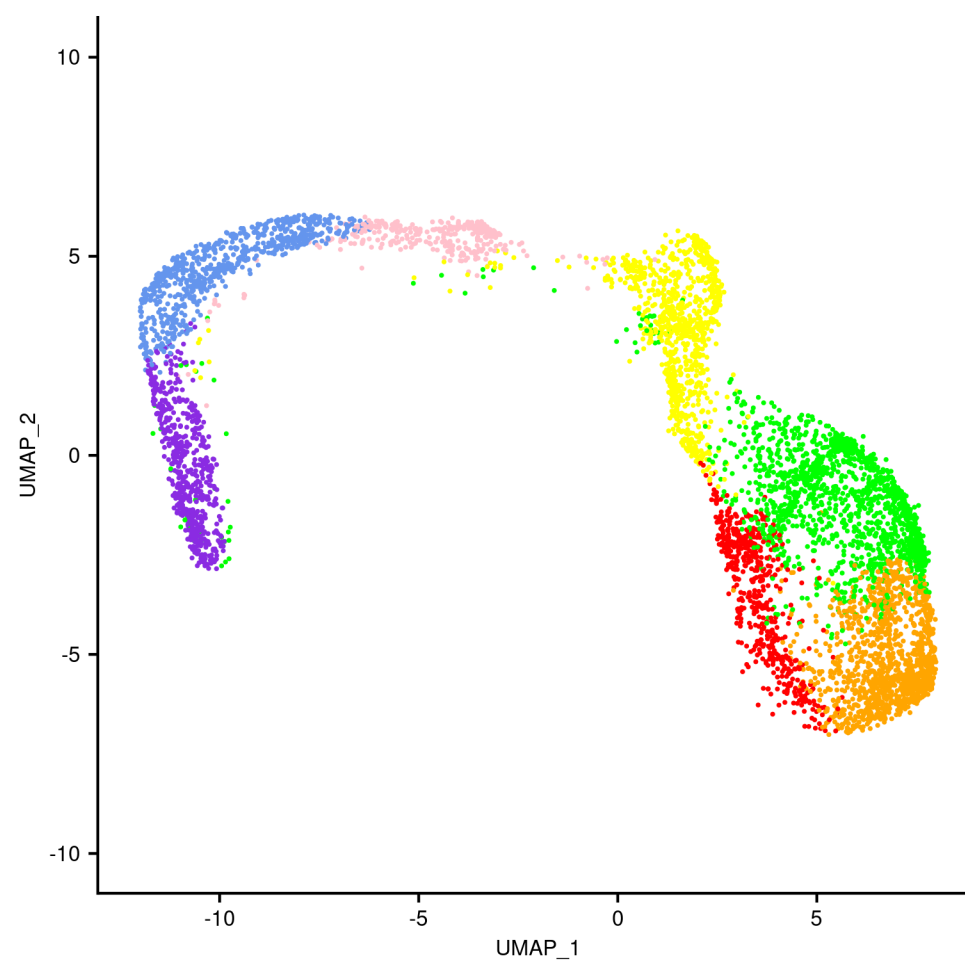

- state 0
- state 0B
- late diff SPG
- zygotene
- state 0A/1
- early diff SPG
- leptotene
