# Supplementary material for: Adult Human, but Not Rodent, Spermatogonial Stem Cells Retain States with a Foetal-like Signature
Source: MDPI journal article supplement (doi:10.3390/cells13090742), 2024-04-24
Supplement: s1 [file s1]

A

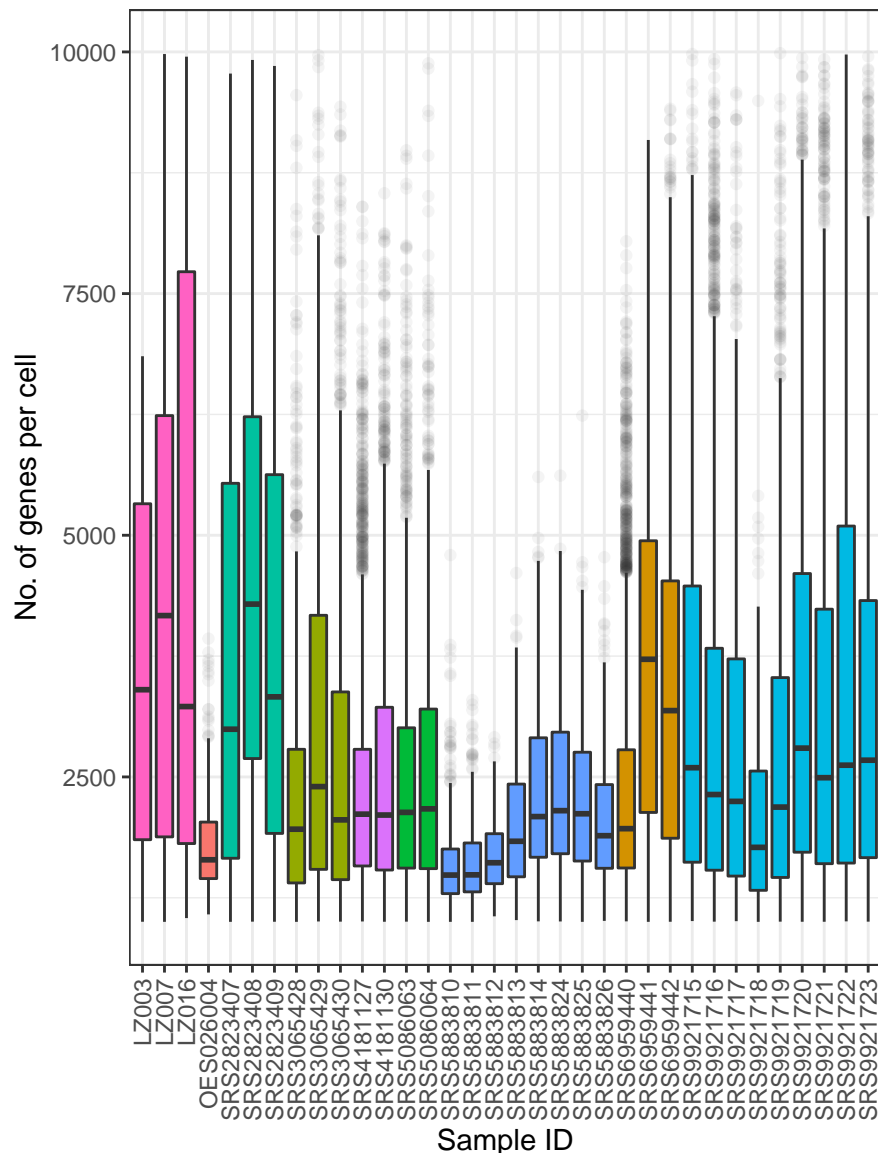

B

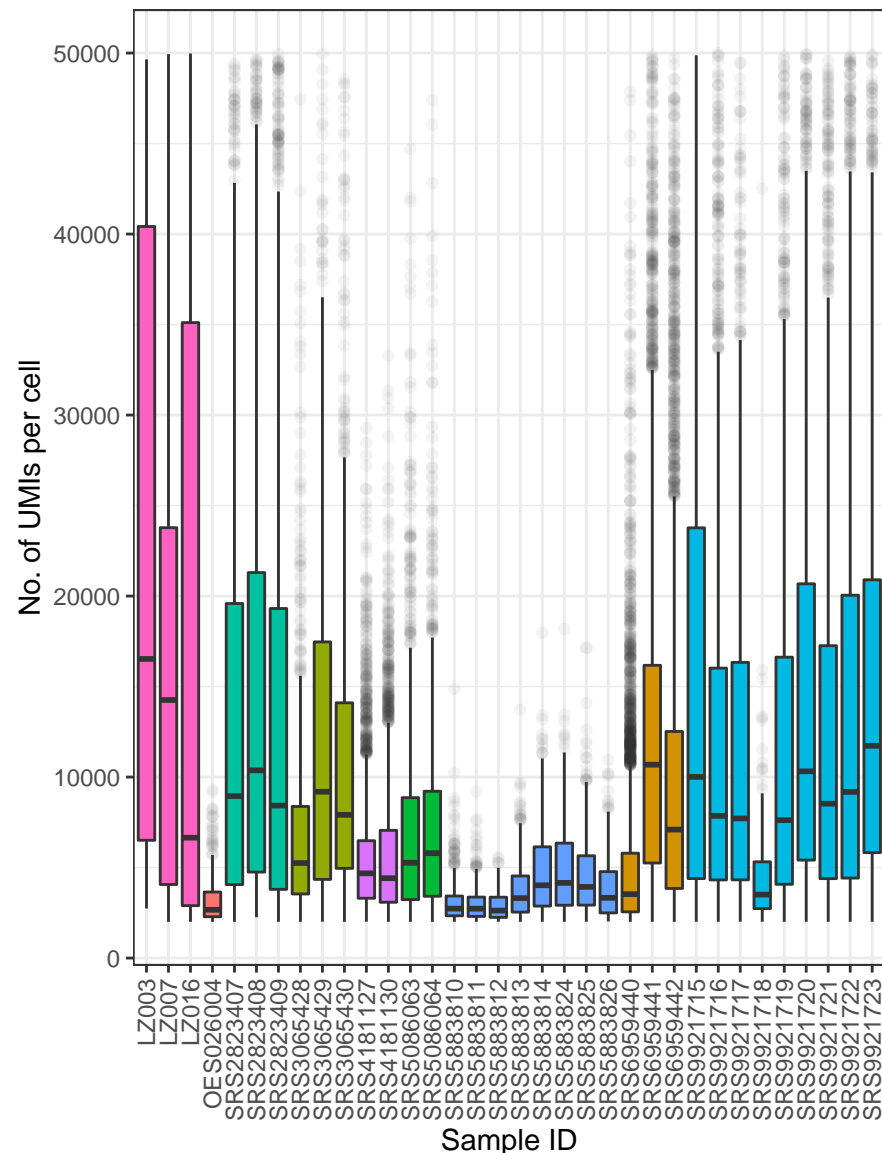

C

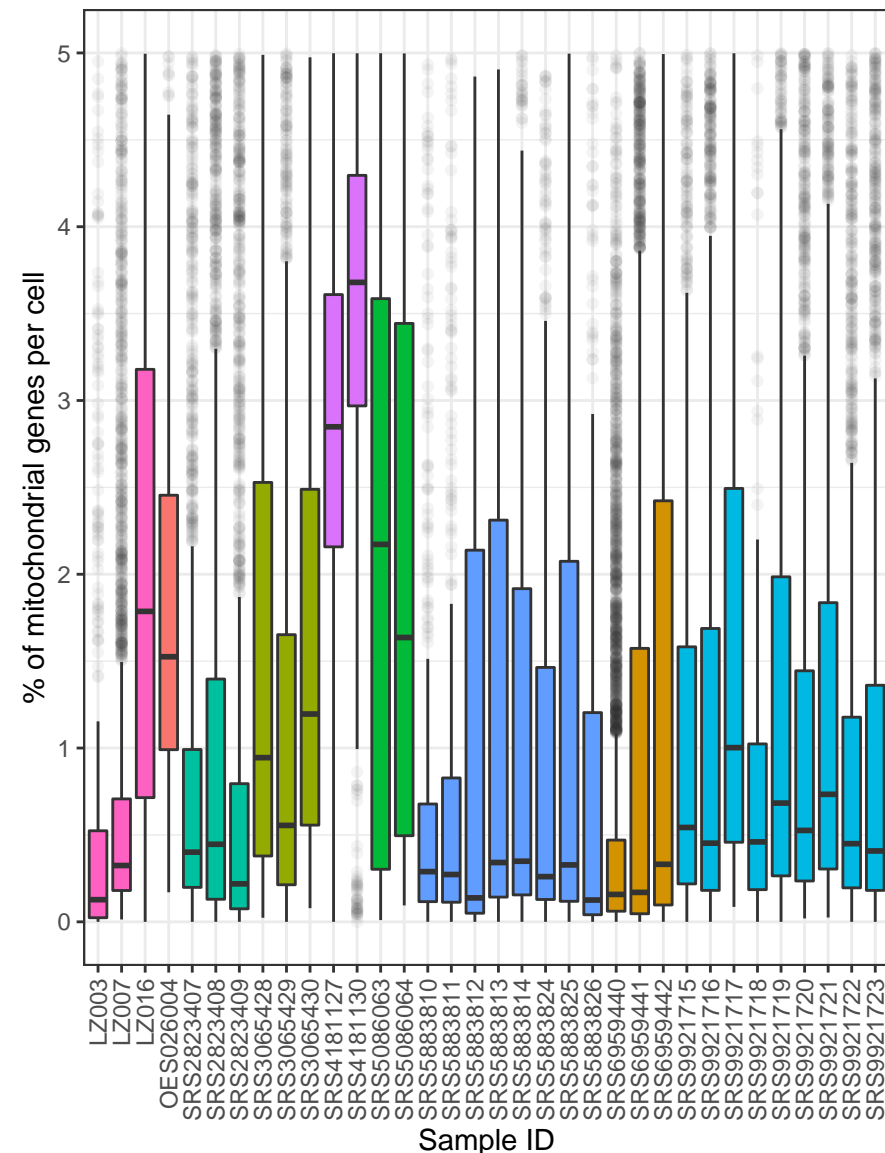

source

|                |          |              |            |           |
|----------------|----------|--------------|------------|-----------|
| Chen 2020      | Guo 2018 | Hermann 2018 | Shami 2020 | Zhao 2020 |
| Di Persio 2021 | Guo 2020 | Nie 2022     | Sohni 2019 |           |
