# Supplementary material for: Adult Human, but Not Rodent, Spermatogonial Stem Cells Retain States with a Foetal-like Signature
Source: MDPI journal article supplement (doi:10.3390/cells13090742), 2024-04-24

Reference

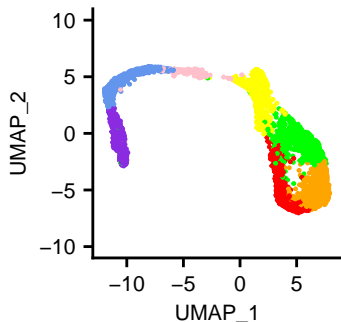rhesus macaque, 15–20 months  
(SRS16347195)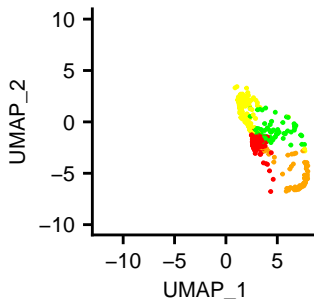rhesus macaque, 15–20 months  
(SRS16347199)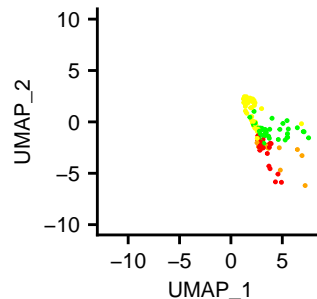rhesus macaque, 15–20 months  
(SRS16347200)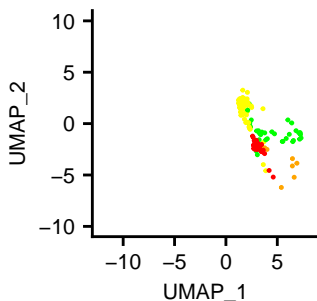rhesus macaque, >=4 years old  
(SRS5883815)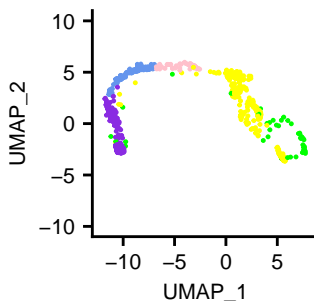rhesus macaque, 5.9 years old  
(SRS5883822)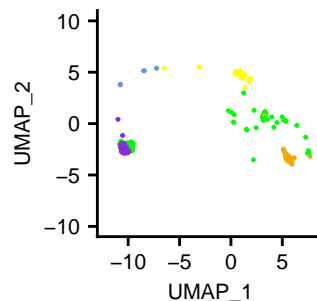rhesus macaque, 5.9 years old  
(SRS5883823)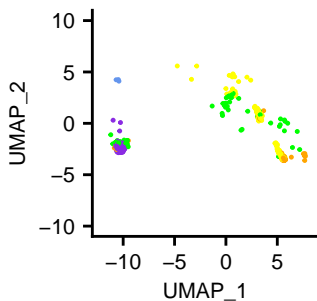rhesus macaque, 7.3 years old  
(SRS5883818)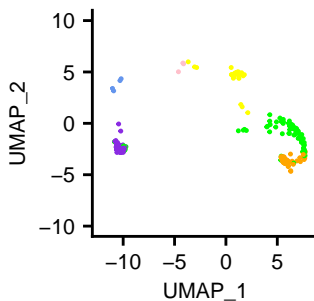rhesus macaque, 7.3 years old  
(SRS5883819)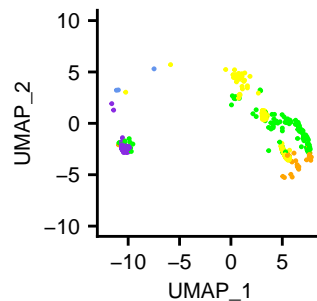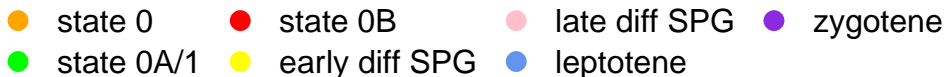

Supplement: s1 [file s1]
