# Supplementary material for: Adult Human, but Not Rodent, Spermatogonial Stem Cells Retain States with a Foetal-like Signature
Source: MDPI journal article supplement (doi:10.3390/cells13090742), 2024-04-24

Reference

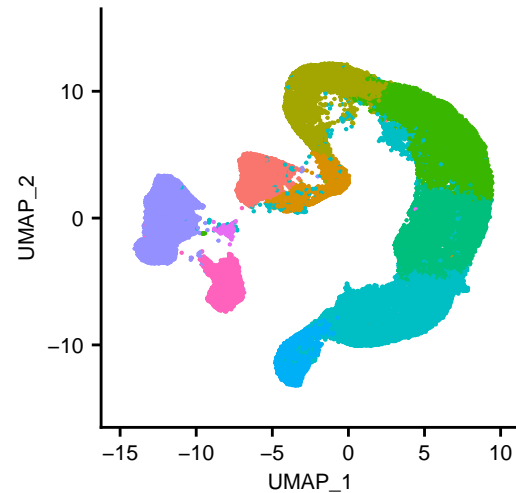E16.5 male mouse germ cells  
(SRS4239093)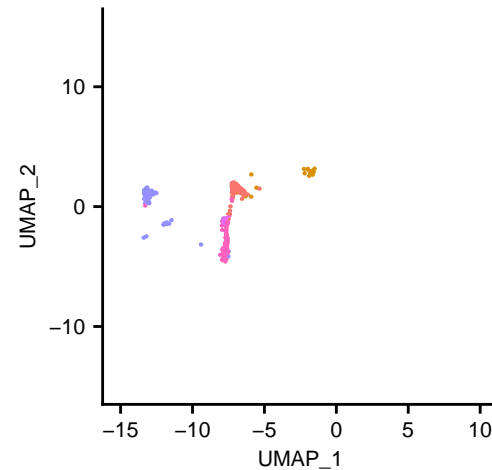

Reference

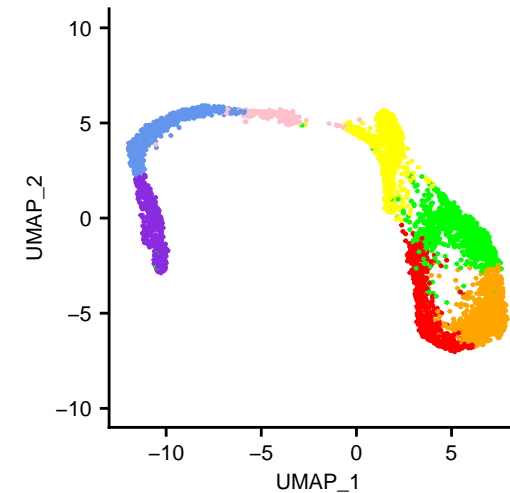E16.5 male mouse germ cells  
(SRS4239093)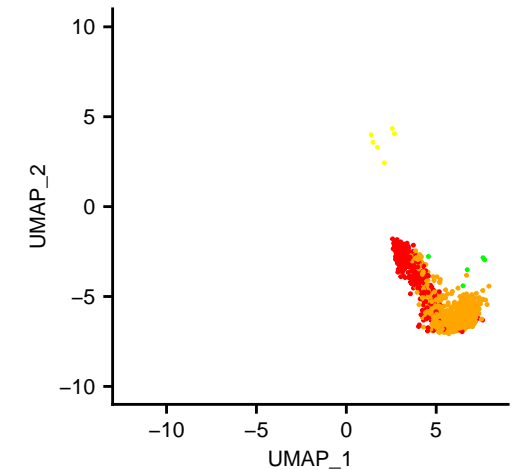E16.5 male mouse germ cells  
(SRS4239094)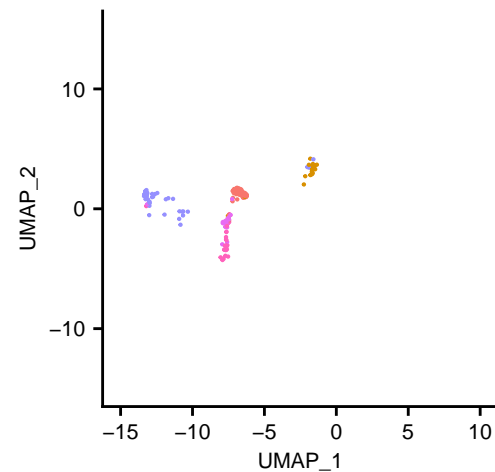E16.5 male mouse germ cells  
(SRS4239095)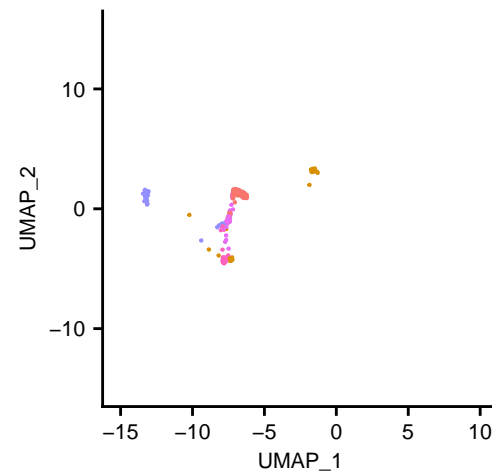E16.5 male mouse germ cells  
(SRS4239094)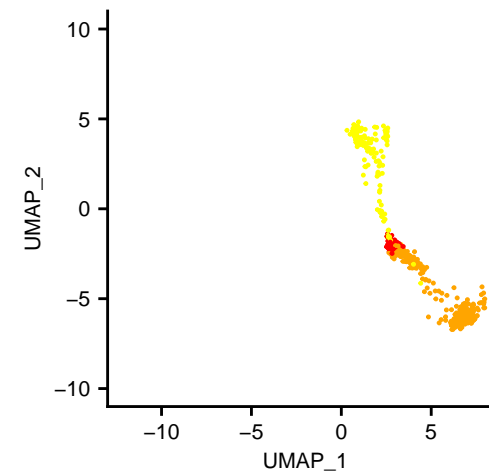E16.5 male mouse germ cells  
(SRS4239095)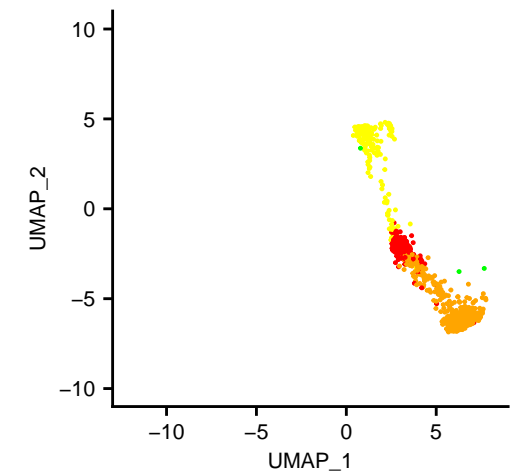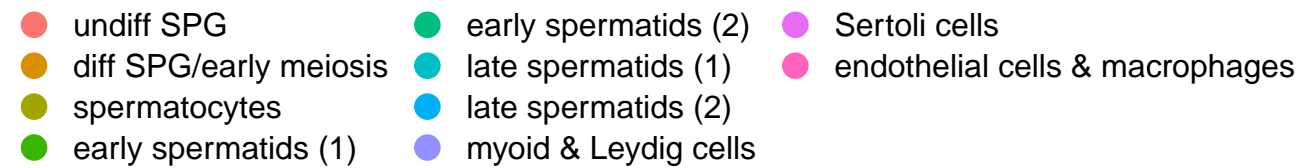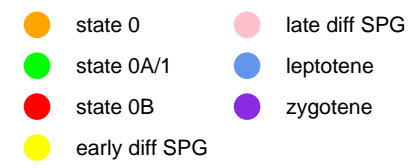

Supplement: s1 [file s1]
