# Supplementary material for: Adult Human, but Not Rodent, Spermatogonial Stem Cells Retain States with a Foetal-like Signature
Source: MDPI journal article supplement (doi:10.3390/cells13090742), 2024-04-24

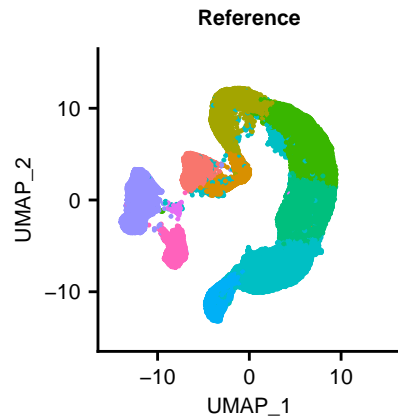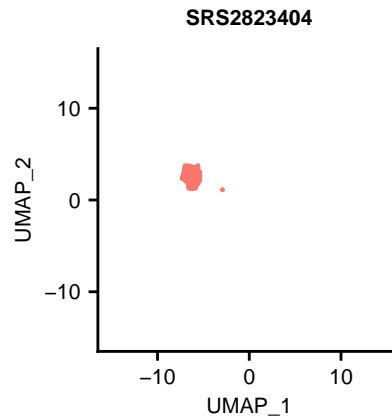

- undiff SPG
- diff SPG/early meiosis
- spermatocytes
- early spermatids (1)
- early spermatids (2)
- late spermatids (1)
- late spermatids (2)
- myoid & Leydig cells
- Sertoli cells
- endothelia & macrophages

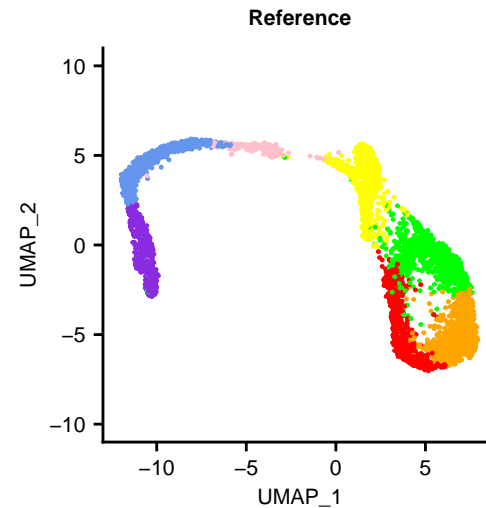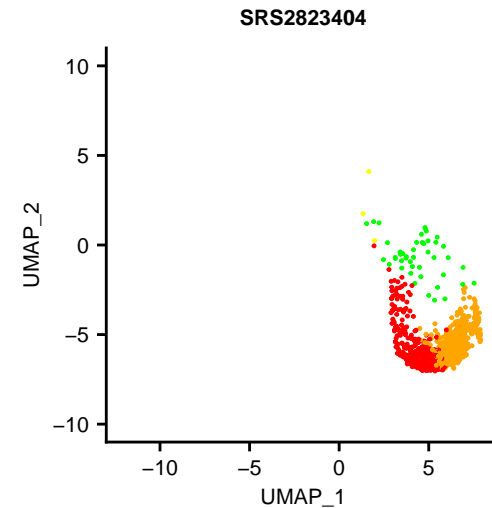

- state 0
- state 0A/1
- state 0B
- early diff SPG
- late diff SPG
- leptotene
- zygotene

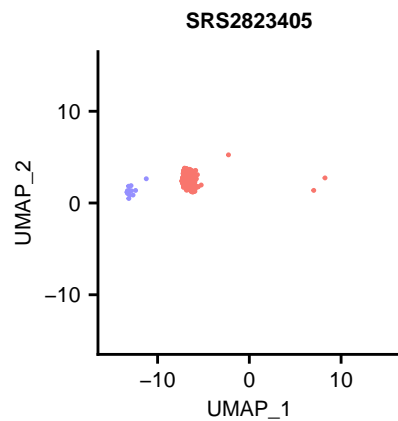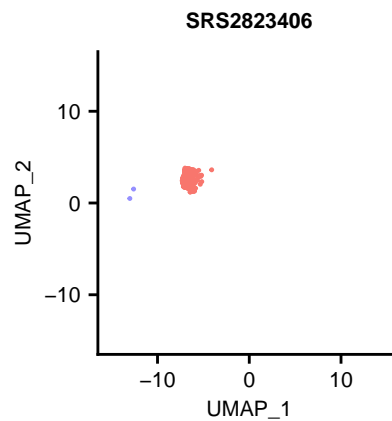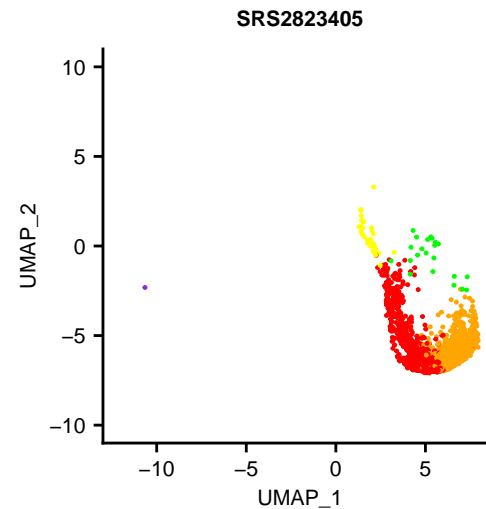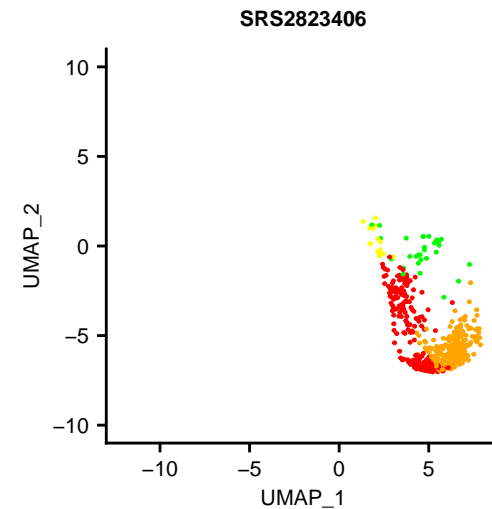

Supplement: s1 [file s1]
