# Supplementary material for: Adult Human, but Not Rodent, Spermatogonial Stem Cells Retain States with a Foetal-like Signature
Source: MDPI journal article supplement (doi:10.3390/cells13090742), 2024-04-24

### Study of origin

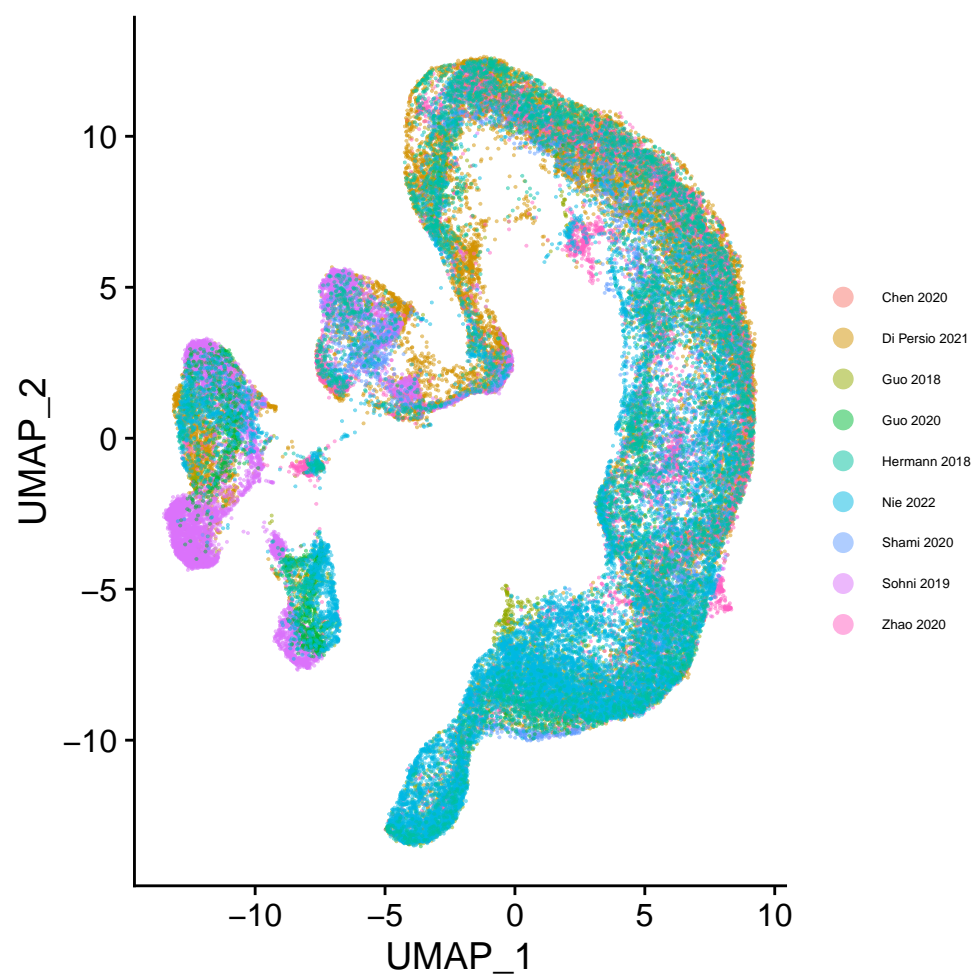

### Age of donor

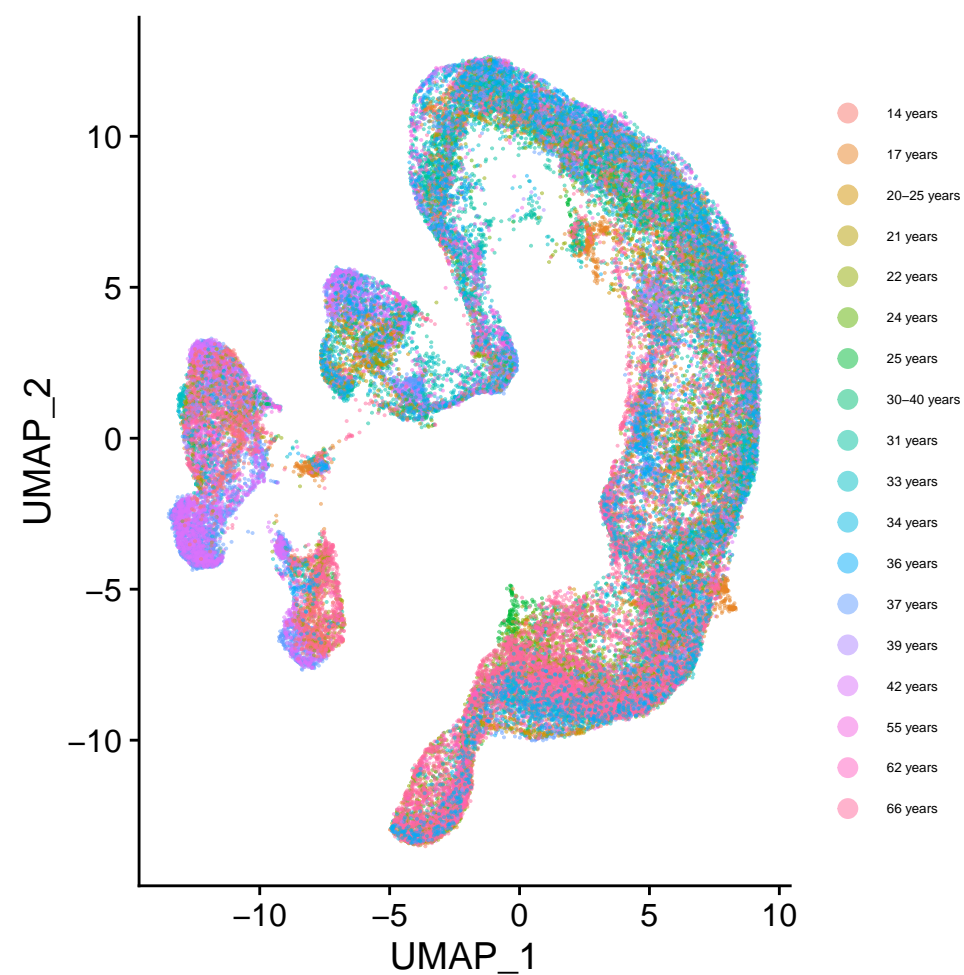

### Sample accession

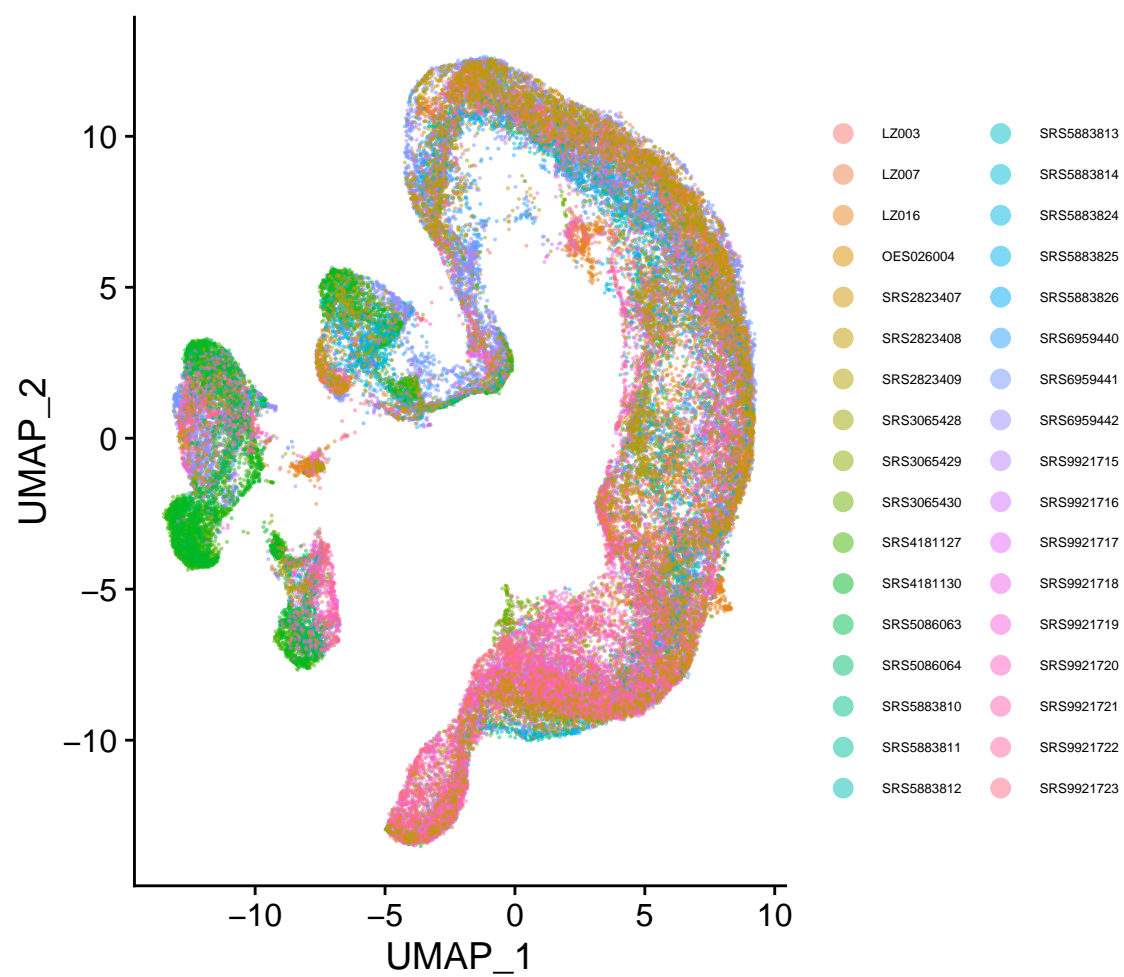

### Phase of cell cycle

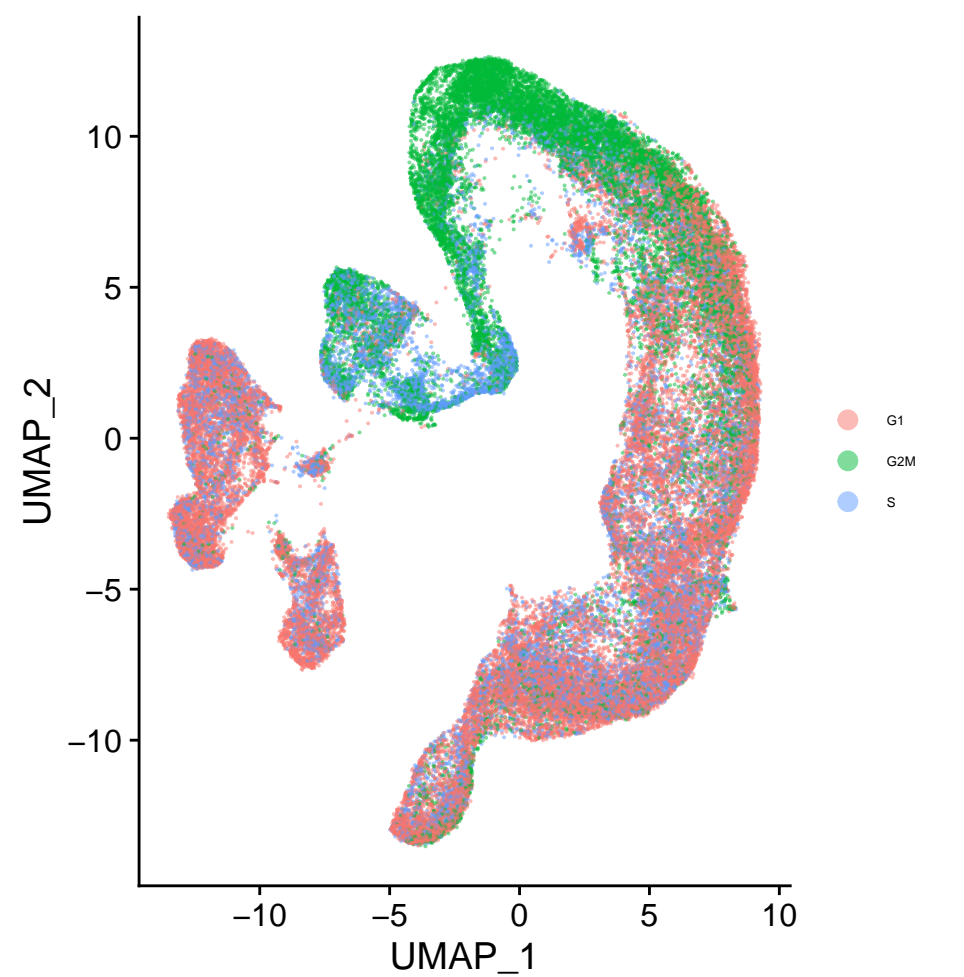

Supplement: s1 [file s1]
