# Supplementary material for: Adult Human, but Not Rodent, Spermatogonial Stem Cells Retain States with a Foetal-like Signature
Source: MDPI journal article supplement (doi:10.3390/cells13090742), 2024-04-24

Reference

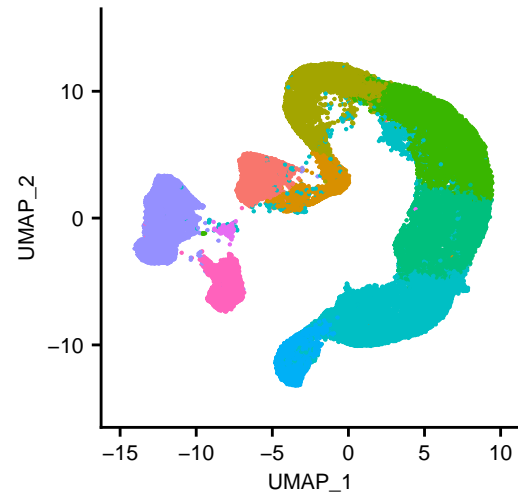undifferentiated mouse SSCs  
(SRS3150566)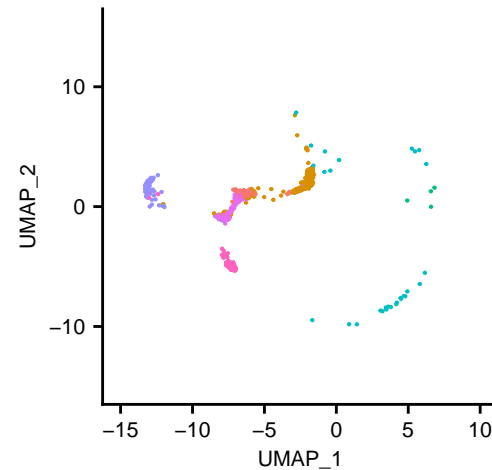

Reference

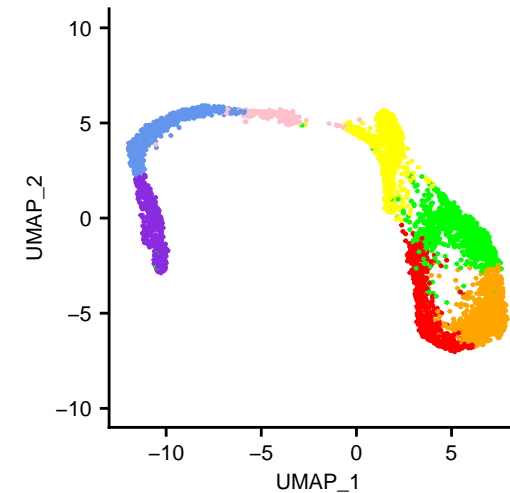undifferentiated mouse SSCs  
(SRS3150566)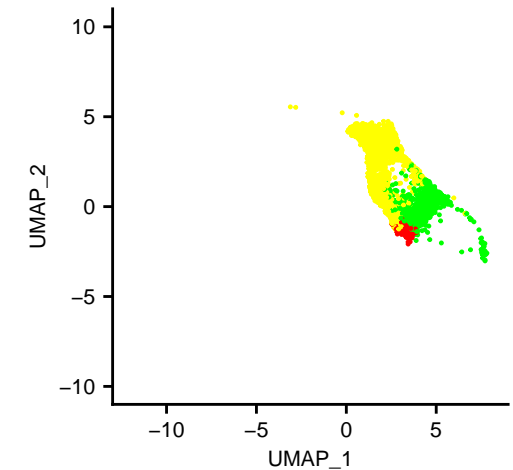undifferentiated mouse SSCs  
(SRS3150567)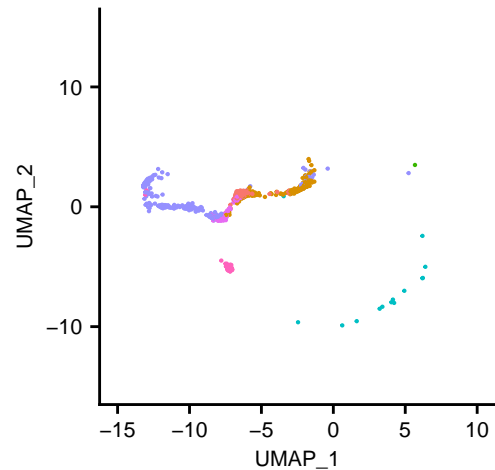undifferentiated mouse SSCs  
(SRS3150567)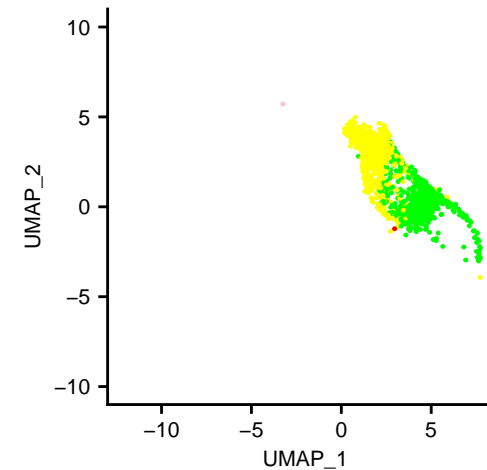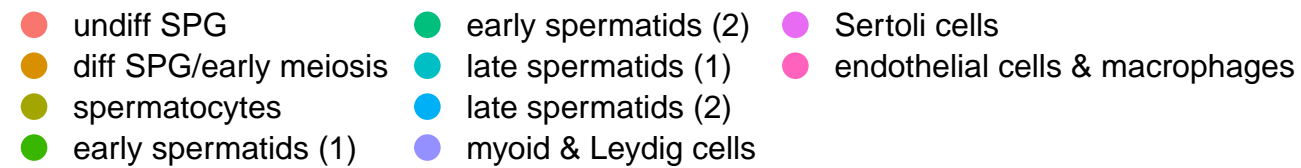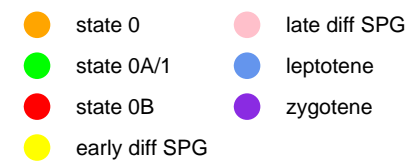

Supplement: s1 [file s1]
