# Supplementary material for: Adult Human, but Not Rodent, Spermatogonial Stem Cells Retain States with a Foetal-like Signature
Source: Cells. 2024 Apr 24;13(9):742. doi: 10.3390/cells13090742 (PMC11083513; doi:10.3390/cells13090742)
Supplement: Supplementary file 1 [file cells-13-00742-s001.zip]

Archive with 18 entries (18 files):
- cells-2947143-supplementary/figure_s1.pdf
- cells-2947143-supplementary/figure_s10.pdf
- cells-2947143-supplementary/figure_s11.pdf
- cells-2947143-supplementary/figure_s12.pdf
- cells-2947143-supplementary/figure_s13.pdf
- cells-2947143-supplementary/figure_s14.pdf
- cells-2947143-supplementary/figure_s15.pdf
- cells-2947143-supplementary/figure_s16.pdf
- cells-2947143-supplementary/figure_s2.pdf
- cells-2947143-supplementary/figure_s3.pdf
- cells-2947143-supplementary/figure_s4.pdf
- cells-2947143-supplementary/figure_s5.pdf
- cells-2947143-supplementary/figure_s6.pdf
- cells-2947143-supplementary/figure_s7.pdf
- cells-2947143-supplementary/figure_s8.pdf
- cells-2947143-supplementary/figure_s9.pdf
- cells-2947143-supplementary/Supplementary Tables 1 to 22.xlsx
- cells-2947143-supplementary/Supplementary Text.pdf
