# Supplementary material for: Adult Human, but Not Rodent, Spermatogonial Stem Cells Retain States with a Foetal-like Signature
Source: Cells. 2024 Apr 24;13(9):742. doi: 10.3390/cells13090742 (PMC11083513; doi:10.3390/cells13090742)
Supplement: Supplementary file 1 [file cells-13-00742-s001.zip › cells-2947143-supplementary/Supplementary Tables 1 to 22.xlsx]

## Sheet: Index
Index
Table	Title
1	Source of testes scRNA-seq datasets
2	scRNA-seq sample metadata
3	Number of cells, genes, and average genes per cell, per sample
4	Cell and spermatogonial cell state biomarkers
5	Adult human testis expression atlas
6	Adult human SPG expression atlas (Seurat clustering resolution 0.3)
7	Adult human SPG expression atlas (Seurat clustering resolution 1.1)
8	Adult human SPG expression atlas (Seurat clustering resolution 1.2)
9	Enriched biological process GO terms for genes differentially expressed in the adult testis atlas
10	Enriched biological process GO terms for genes differentially expressed in the SPG atlas (in an all-against-all analysis)
11	Enriched biological process GO terms for genes differentially expressed in the SPG atlas (in an X-against-Y analysis)
12	Enriched KEGG pathways for genes differentially expressed in the SPG atlas (in an X-against-Y analysis)
13	Proportion of cells in each SPG atlas cluster in each cell cycle phase
14	Expression of quiescence-associated genes in undifferentiated spermatogonial states 0, 0A, and 0B
15	Proportion of cells from 62 human samples projecting to each of seven SPG atlas clusters
16	Proportion of cells from 1 sheep, 1 pig, 2 buffalo, 4 cynomolgus macaque, 11 rhesus macaque, and 8 rat samples projecting to each of seven SPG atlas clusters
17	Proportion of cells from 37 mouse samples projecting to each of seven SPG atlas clusters
18	Average age of sexual maturity and maximum lifespan
19	Proportion of cluster-enriched genes, from Huang, et al. (2023), detectable in the SPG atlas
20	Proportion of core mammalian spermatogenic genes, from Murat, et al. (2023), detectable in the SPG atlas
21	Gene expression in mouse germ cells from postnatal days 5 and 6
22	Cell cycle phase predictions for the cells comprising the SPG atlas

## Sheet: Supplementary Table 1
Supplementary Table 1. Source of testes and germ cell scRNA-seq datasets.
Publication	SRA BioProject ID	GEO accession	Other accession (database)	Library kit + sequencing platform	No. of samples (includes replicate samples from the same individual)	No. of individuals	Ages	Publication URL	Notes
Human adult
Guo 2018	PRJNA438956	GSE112013	n/a	10XV2 + Illumina HiSeq 2500	3	3	17, 24, and 25 years	https://pubmed.ncbi.nlm.nih.gov/30315278/
Hermann 2018	PRJNA429472	GSE109037	n/a	10XV2 + Illumina HiSeq 2500	3	3	34, 36, and 49 years	https://pubmed.ncbi.nlm.nih.gov/30404016/
Sohni 2019	PRJNA511433	GSE124263	n/a	10XV2 + Illumina HiSeq 4000	2	2	37 and 42 years	https://pubmed.ncbi.nlm.nih.gov/30726734/
Chen 2020	n/a	n/a	OEP000778 (NODE)	GEXSCOPE + Illumina HiSeq X Ten	1	1	36 years	https://doi.org/10.1016/j.gendis.2020.09.004
Guo 2020	PRJNA554092	GSE134144	n/a	10XV2 + Illumina HiSeq 2500	2	1	14 years	http://pubmed.ncbi.nlm.nih.gov/31928944/	This 14 year old is an adult for the purpose of this study as it is evident from his sample that he produces mature sperm (unlike the 13 year old sample from the same study, detailed in the "human child" section, below).
Shami 2020	PRJNA597586	GSE142585	n/a	DropSeq + Illumina HiSeq 2500	8	4	20-25, 30-40, and 37 years	https://pubmed.ncbi.nlm.nih.gov/32504559/	The samples given a range of ages are nevertheless from individual donors for whom the precise age was unavailable (for de-identification reasons); they do not represent pooled data.
Zhao 2020	PRJNA615042	GSE149512	n/a	10XV3 + Illumina NovaSeq 6000	3	3	17 and 31 years	https://pubmed.ncbi.nlm.nih.gov/33173058/	This paper contains 17 samples in total but they are all (incorrectly) given the same SRA sample ID, SRS6450151. They can be distinguished instead by the field "Library_Name". For the purpose of this study, some samples from this BioProject are discarded: (a) "LZ013&LZ014&LZ015" and "LZ017&LZ018&LZ019" represent pooled data, (b) LZ002 is an "AZFa_Del" sample (Yq AZFa microdeletion), and (c) LZ004…
Di Persio 2021	PRJNA644597	GSE153947	n/a	10XV2 + Illumina NovaSeq 6000	3	3	31, 33 and 55 years	https://pubmed.ncbi.nlm.nih.gov/34622232/
Nie 2022	PRJNA757777	GSE182786	n/a	10XV3 + Illumina NovaSeq 6000	9	9	17, 21, 22, 62 and 66 years	https://pubmed.ncbi.nlm.nih.gov/35504286
				Total	34	29
Human child (pubertal and pre-pubertal)
Guo 2018	PRJNA438956	GSE112013	n/a	10XV2 + Illumina HiSeq 2500	4	2	13 months	https://pubmed.ncbi.nlm.nih.gov/30315278/
Sohni 2019	PRJNA511433	GSE124263	n/a	10XV2 + Illumina HiSeq 4000	2	2	2 and 7 days	https://pubmed.ncbi.nlm.nih.gov/30726734/
Guo 2020	PRJNA554092	GSE134144	n/a	10XV2 + Illumina HiSeq 2500	6	3	7, 11 and 13 years	http://pubmed.ncbi.nlm.nih.gov/31928944/
Zhao 2020	PRJNA615042	GSE149512	n/a	10XV3 + Illumina NovaSeq 6000	4	4	2, 5, 8 and 11 years	https://pubmed.ncbi.nlm.nih.gov/33173058/
Guo 2021	PRJNA678957	GSE161617	n/a	10XV3 + Illumina NovaSeq 6000	2	1	5 months	https://pubmed.ncbi.nlm.nih.gov/33453151/
Voigt 2022	PRJNA807362	GSE196817	n/a	10XV3 + Illumina NovaSeq 6000	3	3	1, 2 and 7 years	https://pubmed.ncbi.nlm.nih.gov/35856882/
				Total	21	15
Human embryo/foetus
Wang 2022	n/a	n/a	HRA000344 (GSA)	10XV2 + Illumina HiSeq 4000	7	6	8, 9, 10, 15, 19 and 23 weeks	https://pubmed.ncbi.nlm.nih.gov/35513251/
				Total	7	6
FACS-sorted human spermatogonial stem cells
Hermann 2018	PRJNA429472	GSE109037	n/a	10XV2 + Illumina HiSeq 2500	3	3	37, 38, and 49 years	https://pubmed.ncbi.nlm.nih.gov/30404016/
				Total	3	3
Mouse
Green 2018	PRJNA445877	GSE112393	n/a	DropSeq + Illumina HiSeq 2500	4	4	63 days	https://pubmed.ncbi.nlm.nih.gov/30146481/	The strain of mice used in this paper is C57BL/6J. Some of the samples in this BioProject are mixed-species experiments where the major species is mouse, with spike-ins of either human or monkey. These spike-ins species were used to confirm cells are not doublets by two-species mixing experiments. Data from these samples is not included in the present work.
Ernst 2019	PRJEB27447	n/a	E-MTAB-6946 (ArrayExpress)	10XV2 + Illumina HiSeq 2500	12	12	5, 10, 15, 20, 25, 30, 35, 63 and 67 days	https://pubmed.ncbi.nlm.nih.gov/30890697/	The strain of mice used for all data sourced from this paper is C57BL/6J. However, this paper also makes use of data from an aneuploid mouse line carrying one copy of human chromosome 21 (Tc1 mice). In two cases (ERS2575676 and ERS2575678), the controls for this experiment, Tc0 mice, are used instead. The Tc1 line was maintained by breeding female Tc1 with male C57BL/6J with Tc0 mice defined as l…
Grive 2019	PRJNA499030	GSE121904	n/a	10XV2 + Illumina NextSeq 500	8	7	6, 14, 18, 25 and 30 days, and 8 weeks	https://pubmed.ncbi.nlm.nih.gov/30893341	The strain of mice used for all data sourced from this paper is B6D2F1/J.
La 2018	PRJNA449375	GSE112880	n/a	10XV3 + Illumina NextSeq 500	2	2	8-10 weeks	https://pubmed.ncbi.nlm.nih.gov/30026551
Law 2019	PRJNA514270	GSE124904	n/a	10XV2 + Illumina HiSeq 4000	3	1	embryonic day 16.5	https://pubmed.ncbi.nlm.nih.gov/31243281
Jung 2019	PRJNA450677	GSE113293	n/a	DropSeq + Illumina HiSeq 2500	11	11	3 months 1 day, 3 months 2 days, 3 months 21 days, 3 months 27 days, 4 months, 4 months 2 days, 5 months 5 days , 5 months 7 days, 7 months 21 days, 9 months 14 days	https://pubmed.ncbi.nlm.nih.gov/31237565/	The strain of mice used for all data sourced from this paper is C57BL/6.
				Total	40	37
Rhesus macaque (Macaca mulatta)
Shami 2020	PRJNA597586	GSE142585	n/a	DropSeq + Illumina HiSeq 2500	8	5	>= 4, 5.9, 7.3, 9.3 and 13 years	https://pubmed.ncbi.nlm.nih.gov/32504559/
Singh 2023	PRJNA917768	GSE222105	n/a	10XV2 + Illumina HiSeq 2500	3	2	15-20 months	https://pubmed.ncbi.nlm.nih.gov/36902187/
				Total	11	7
Cynomolgus (crab-eating) macaque (Macaca fascicularis)
Lau 2020	PRJEB37970	n/a	E-MTAB-8979 (ArrayExpress)	10XV3 + Illumina HiSeq 4000	4	4	1, 2 and > 4 years	https://pubmed.ncbi.nlm.nih.gov/32795394/	This paper also contains, for one of the two adult (>4 yr) donors, a subset of FACS-sorted samples (which were not used in the present work). These samples are enriched for spermatogonia by sorting with SSEA4 as a marker.
				Total	4	4
Pig
Zhang 2021	PRJNA731514	GSE174782	n/a	10XV3 + Illumina NovaSeq 6000	1	1	150 days	https://pubmed.ncbi.nlm.nih.gov/34872612/
				Total	1	1
Rat
Whelan 2022	PRJNA756273	GSE182438	n/a	INDROPSV2 + Illumina NextSeq 500	13	13	8-10 weeks	https://pubmed.ncbi.nlm.nih.gov/35536782/
				Total	13	13
Sheep
Yang 2021	PRJNA669837	GSE159599	n/a	10XV3 + Illumina HiSeq X Ten	1	1	1.5 years	https://pubmed.ncbi.nlm.nih.gov/33197070/
				Total	1	1
Buffalo
Huang 2023	PRJNA787261	GSE190477	n/a	10XV3 + Illumina NovaSeq 6000	2	2	3 months, 2 years	https://pubmed.ncbi.nlm.nih.gov/36582818/
				Total	2	2

## Sheet: Supplementary Table 2
Supplementary Table 2. scRNA-seq sample metadata.
Note that the Shami 2020 samples given a range of ages are nevertheless from individual donors for whom the precise age was unavailable (for de-identification reasons); they do not represent pooled data.
Sample and run IDs are SRA accessions, unless where otherwise stated in Supplementary Table 1 (samples from Chen 2000 and Wang 2022 are sourced from alternative databases).
Publication	Sample ID	Run ID(s)	Library layout	Age category	Age	Individual	Technology	Sample type (whole testis/biopsy)	Origin of sample	Included in SPG atlas (a subset of the adult whole-testis atlas)?
Human adult
Guo 2018	SRS3065428	SRR6860520	PAIRED	adult	17 years	donor 1	10XV2	whole testis	postmortem from donor	no
	SRS3065429	SRR6860522	PAIRED	adult	24 years	donor 2	10XV2	whole testis	postmortem from donor	no
	SRS3065430	SRR6860524	PAIRED	adult	25 years	donor 3	10XV2	whole testis	postmortem from donor	no
Hermann 2018	SRS2823407	SRR6459190	PAIRED	adult	34 years	donor 1	10XV2	biopsy	biopsy from patient undergoing vasectomy reversal or testicular sperm extraction	no
	SRS2823408	SRR6459192	PAIRED	adult	49 years	donor 2	10XV2	biopsy	biopsy from patient undergoing vasectomy reversal or testicular sperm extraction	yes
	SRS2823409	SRR6459191	PAIRED	adult	36 years	donor 3	10XV2	biopsy	biopsy from patient undergoing vasectomy reversal or testicular sperm extraction	yes
Sohni 2019	SRS4181127	SRR8363250,SRR8363251,SRR8363252,SRR8363253,SRR8363254,SRR8363255,SRR8363306,SRR8363307,SRR8363308,SRR8363309,SRR8363310,SRR8363311,SRR8363312,SRR8363313,SRR8363314,SRR8363315,SRR8363316,SRR8363317,SRR8363318,SRR8363319,SRR8363256,SRR8363257,SRR8363320,SRR8363321	PAIRED	adult	37 years	donor 1	10XV2	biopsy	biopsy from patient undergoing vasectomy reversal	yes
	SRS4181130	SRR8363262,SRR8363263,SRR8363264,SRR8363265	PAIRED	adult	42 years	donor 2	10XV2	biopsy	biopsy from patient undergoing vasectomy reversal	yes
Chen 2020	OES026004	OEP000778	PAIRED	adult	36 years	donor 1	GEXSCOPE	biopsy	biopsy from patient undergoing testicular sperm extraction for obstructive azoospermia (epididymitis)	no
Guo 2020	SRS5086064	SRR9670693	PAIRED	child	14 years	donor 1	10XV2	whole testis	postmortem from donor	no
	SRS5086063	SRR9670692	PAIRED	child	14 years	donor 1	10XV2	whole testis	postmortem from donor	no
Shami 2020	SRS5883810	SRR10765311,SRR10765312	PAIRED	adult	37 years	donor 1	DROPSEQ	whole testis	postmortem from donor	no
	SRS5883811	SRR10765313,SRR10765314	PAIRED	adult	37 years	donor 1	DROPSEQ	whole testis	postmortem from donor	no
	SRS5883812	SRR10765315,SRR10765316	PAIRED	adult	30-40 years	donor 2	DROPSEQ	whole testis	postmortem from donor	no
	SRS5883813	SRR10765317,SRR10765318,SRR10765319,SRR10765320	PAIRED	adult	30-40 years	donor 2	DROPSEQ	whole testis	postmortem from donor	no
	SRS5883814	SRR10765321	PAIRED	adult	30-40 years	donor 3	DROPSEQ	whole testis	postmortem from donor	no
	SRS5883824	SRR10765301,SRR10765302	PAIRED	adult	20-25 years	donor 4	DROPSEQ	whole testis	postmortem from donor	no
	SRS5883825	SRR10765303,SRR10765304	PAIRED	adult	20-25 years	donor 4	DROPSEQ	whole testis	postmortem from donor	yes
	SRS5883826	SRR10765305,SRR10765306	PAIRED	adult	20-25 years	donor 4	DROPSEQ	whole testis	postmortem from donor	no
Zhao 2020	LZ003	SRR11509931	PAIRED	adult	31 years	donor 1	10XV3	biopsy	either residual tissue after testicular sperm extraction, or a biopsy or partial testicular excision from a patient presenting with either testicular torsion, benign testicle mass, or cyptorchidism	no
	LZ007	SRR11509938,SRR11549162,SRR11549163,SRR11549164	PAIRED	adult	31 years	donor 2	10XV3	biopsy	either residual tissue after testicular sperm extraction, or a biopsy or partial testicular excision from a patient presenting with either testicular torsion, benign testicle mass, or cyptorchidism	yes
	LZ016	SRR11509929,SRR11549156,SRR11549157,SRR11549158	PAIRED	adult	17 years	donor 3	10XV3	biopsy	either residual tissue after testicular sperm extraction, or a biopsy or partial testicular excision from a patient presenting with either testicular torsion, benign testicle mass, or cyptorchidism	no
Di Persio 2021	SRS6959440	SRR12164933	PAIRED	adult	31 years	donor 1	10XV2	biopsy	biopsy from patient undergoing testicular sperm extraction for obstructive azoospermia (congenital bilateral absence of the vas deferens)	yes
	SRS6959441	SRR12164934	PAIRED	adult	33 years	donor 1	10XV2	biopsy	biopsy from patient undergoing testicular sperm extraction for obstructive azoospermia (congenital bilateral absence of the vas deferens)	yes
	SRS6959442	SRR12164935	PAIRED	adult	55 years	donor 2	10XV2	biopsy	biopsy from patient undergoing testicular sperm extraction for obstructive azoospermia (vasectomy)	yes
Nie 2022	SRS9921715	SRR15613719	PAIRED	adult	17 years	donor 1	10XV3	whole testis	postmortem from donor	no
	SRS9921716	SRR15613720	PAIRED	adult	22 years	donor 2	10XV3	whole testis	postmortem from donor	no
	SRS9921717	SRR15613721	PAIRED	adult	22 years	donor 3	10XV3	whole testis	postmortem from donor	no
	SRS9921718	SRR15613722	PAIRED	adult	21 years	donor 4	10XV3	whole testis	postmortem from donor	no
	SRS9921719	SRR15613723	PAIRED	adult	66 years	donor 5	10XV3	whole testis	postmortem from donor	no
	SRS9921720	SRR15613724	PAIRED	adult	66 years	donor 6	10XV3	whole testis	postmortem from donor	no
	SRS9921721	SRR15613725	PAIRED	adult	66 years	donor 7	10XV3	whole testis	postmortem from donor	no
	SRS9921722	SRR15613726	PAIRED	adult	62 years	donor 8	10XV3	whole testis	postmortem from donor	no
	SRS9921723	SRR15613727	PAIRED	adult	66 years	donor 9	10XV3	whole testis	postmortem from donor	no
Human child (pubertal and pre-pubertal)
Guo 2018	SRS3822680	SRR7904997	PAIRED	child	13 months	donor 1	10XV2	whole testis	postmortem from donor	NA
	SRS3822682	SRR7904998	PAIRED	child	13 months	donor 1	10XV2	whole testis	postmortem from donor	NA
	SRS3822683	SRR7904999	PAIRED	child	13 months	donor 2	10XV2	whole testis	postmortem from donor	NA
	SRS3822686	SRR7905000	PAIRED	child	13 months	donor 2	10XV2	whole testis	postmortem from donor	NA
Sohni 2019	SRS4181123	SRR8363218,SRR8363219,SRR8363220,SRR8363221,SRR8363222,SRR8363223,SRR8363224,SRR8363225,SRR8363226,SRR8363227,SRR8363228,SRR8363229,SRR8363230,SRR8363231,SRR8363232,SRR8363233,SRR8363234,SRR8363235,SRR8363236,SRR8363237,SRR8363238,SRR8363239,SRR8363240,SRR8363241	PAIRED	child	2 days	donor 1	10XV2	whole testis	postmortem from donor	NA
	SRS4181126	SRR8363270,SRR8363271,SRR8363272,SRR8363273,SRR8363274,SRR8363275,SRR8363276,SRR8363277,SRR8363278,SRR8363279,SRR8363280,SRR8363281	PAIRED	child	7 days	donor 2	10XV2	whole testis	postmortem from donor	NA
Guo 2020	SRS5086062	SRR9670691	PAIRED	child	13 years	donor 3	10XV2	whole testis	postmortem from donor	NA
	SRS5086061	SRR9670690	PAIRED	child	13 years	donor 3	10XV2	whole testis	postmortem from donor	NA
	SRS5086060	SRR9670689	PAIRED	child	11 years	donor 2	10XV2	whole testis	postmortem from donor	NA
	SRS5086059	SRR9670688	PAIRED	child	11 years	donor 2	10XV2	whole testis	postmortem from donor	NA
	SRS5086058	SRR9670687	PAIRED	child	7 years	donor 1	10XV2	whole testis	postmortem from donor	NA
	SRS5086057	SRR9670686	PAIRED	child	7 years	donor 1	10XV2	whole testis	postmortem from donor	NA
Zhao 2020	LZ005	SRR11509939,SRR11616269,SRR11616270,SRR11616271,SRR11616272,SRR11616273,SRR11616274,SRR11616275	SINGLE	child	8 years	donor 1	10XV3	biopsy	biopsy or partial testicular excision from a patient presenting with either testicular torsion, benign testicle mass, or cyptorchidism	NA
	LZ008	SRR11509937	SINGLE	child	11 years	donor 2	10XV3	biopsy	biopsy or partial testicular excision from a patient presenting with either testicular torsion, benign testicle mass, or cyptorchidism	NA
	LZ009	SRR11509936	SINGLE	child	5 years	donor 3	10XV3	biopsy	biopsy or partial testicular excision from a patient presenting with either testicular torsion, benign testicle mass, or cyptorchidism	NA
	LZ011	SRR11509934,SRR11549159,SRR11549160,SRR11549161	SINGLE	child	2 years	donor 4	10XV3	biopsy	biopsy or partial testicular excision from a patient presenting with either testicular torsion, benign testicle mass, or cyptorchidism	NA
Guo 2021	SRS7727466	SRR13073082	PAIRED	child	5 months	donor 1	10XV3	whole testis	postmortem from donor	NA
	SRS7727467	SRR13073083	PAIRED	child	5 months	donor 1	10XV3	whole testis	postmortem from donor	NA
Voigt 2022	SRS12015708	SRR18042673	PAIRED	child	7 years	donor 1	10XV3	whole testis	postmortem from donor	NA
	SRS12015709	SRR18042672	PAIRED	child	1 year	donor 2	10XV3	whole testis	postmortem from donor	NA
	SRS12015710	SRR18042671	PAIRED	child	2 years	donor 3	10XV3	whole testis	postmortem from donor	NA
Human embryo/foetus
Wang 2022	HRS095806	HRR131892,HRR131893	PAIRED	embryo/foetus	8 weeks	donor 1	10XV2	whole testis	postmortem from donor	NA
	HRS095807	HRR131894	PAIRED	embryo/foetus	9 weeks	donor 2	10XV2	whole testis	postmortem from donor	NA
	HRS095808	HRR131895	PAIRED	embryo/foetus	10 weeks	donor 3	10XV2	whole testis	postmortem from donor	NA
	HRS095810	HRR131897,HRR131898	PAIRED	embryo/foetus	15 weeks	donor 4	10XV2	whole testis	postmortem from donor	NA
	HRS095813	HRR131901	PAIRED	embryo/foetus	19 weeks	donor 5	10XV2	whole testis	postmortem from donor	NA
	HRS095816	HRR131904,HRR131905	PAIRED	embryo/foetus	23 weeks	donor 6	10XV2	whole testis	postmortem from donor	NA
	HRS095817	HRR131906	PAIRED	embryo/foetus	23 weeks	donor 6	10XV2	whole testis	postmortem from donor	NA
FACS-sorted human spermatogonial stem cells
Hermann 2018	SRS2823404	SRR6459187	PAIRED	adult	37 years	donor 1	10XV2	biopsy	biopsy from patient undergoing vasectomy reversal or testicular sperm extraction	NA
	SRS2823405	SRR6459188	PAIRED	adult	38 years	donor 2	10XV2	biopsy	biopsy from patient undergoing vasectomy reversal or testicular sperm extraction	NA
	SRS2823406	SRR6459189	PAIRED	adult	49 years	donor 3	10XV2	biopsy	biopsy from patient undergoing vasectomy reversal or testicular sperm extraction	NA
Mouse
Green 2018	SRS3097511	SRR8601883,SRR8601884	PAIRED	adult	63 days	donor 2	DROPSEQ	whole testis	postmortem from donor	NA
	SRS3097512	SRR8601881,SRR8601882	PAIRED	adult	63 days	donor 1	DROPSEQ	whole testis	postmortem from donor	NA
	SRS3097514	SRR8601887,SRR8601888	PAIRED	adult	63 days	donor 6	DROPSEQ	whole testis	postmortem from donor	NA
	SRS3097515	SRR8601885,SRR8601886	PAIRED	adult	63 days	donor 5	DROPSEQ	whole testis	postmortem from donor	NA
Ernst 2019	ERS2575676	ERR2662461,ERR2662462,ERR2662463,ERR2662464,ERR2662465,ERR2662466,ERR2662467,ERR2662468	PAIRED	adult	67 days	donor 1	10XV2	whole testis	postmortem from donor	NA
	ERS2575678	ERR2662477,ERR2662478,ERR2662479,ERR2662480,ERR2662481,ERR2662482,ERR2662483,ERR2662484,ERR2662485,ERR2662486,ERR2662487,ERR2662488,ERR2662489,ERR2662490,ERR2662491,ERR2662492,ERR2662493,ERR2662494,ERR2662495,ERR2662496,ERR2662497,ERR2662498,ERR2662499,ERR2662500,ERR2662501,ERR2662502,ERR2662503,ERR2662504,ERR2662505,ERR2662506,ERR2662507,ERR2662508	PAIRED	adult	63 days	donor 2	10XV2	whole testis	postmortem from donor	NA
	ERS2575680	ERR2662541,ERR2662542,ERR2662543,ERR2662544,ERR2662545,ERR2662546,ERR2662547,ERR2662548,ERR2662549,ERR2662550,ERR2662551,ERR2662552,ERR2662553,ERR2662554,ERR2662555,ERR2662556,ERR2662557,ERR2662558,ERR2662559,ERR2662560,ERR2662561,ERR2662562,ERR2662563,ERR2662564,ERR2662565,ERR2662566,ERR2662567,ERR2662568,ERR2662569,ERR2662570,ERR2662571,ERR2662572	PAIRED	adult	67 days	donor 3	10XV2	whole testis	postmortem from donor	NA
	ERS2575681	ERR2662573,ERR2662574,ERR2662575,ERR2662576,ERR2662577,ERR2662578,ERR2662579,ERR2662580,ERR2662581,ERR2662582,ERR2662583,ERR2662584,ERR2662585,ERR2662586,ERR2662587,ERR2662588,ERR2662589,ERR2662590,ERR2662591,ERR2662592,ERR2662593,ERR2662594,ERR2662595,ERR2662596,ERR2662597,ERR2662598,ERR2662599,ERR2662600,ERR2662601,ERR2662602,ERR2662603,ERR2662604	PAIRED	adult	67 days	donor 4	10XV2	whole testis	postmortem from donor	NA
	ERS2575682	ERR2662605,ERR2662606,ERR2662607,ERR2662608,ERR2662609,ERR2662610,ERR2662611,ERR2662612,ERR2662613,ERR2662614,ERR2662615,ERR2662616,ERR2662617,ERR2662618,ERR2662619,ERR2662620,ERR2662621,ERR2662622,ERR2662623,ERR2662624,ERR2662625,ERR2662626,ERR2662627,ERR2662628,ERR2662629,ERR2662630,ERR2662631,ERR2662632,ERR2662633,ERR2662634,ERR2662635,ERR2662636	PAIRED	juvenile	10 days	donor 5	10XV2	whole testis	postmortem from donor	NA
	ERS2575683	ERR2662637,ERR2662638,ERR2662639,ERR2662640,ERR2662641,ERR2662642,ERR2662643,ERR2662644,ERR2662645,ERR2662646,ERR2662647,ERR2662648,ERR2662649,ERR2662650,ERR2662651,ERR2662652,ERR2662653,ERR2662654,ERR2662655,ERR2662656,ERR2662657,ERR2662658,ERR2662659,ERR2662660,ERR2662661,ERR2662662,ERR2662663,ERR2662664,ERR2662665,ERR2662666,ERR2662667,ERR2662668	PAIRED	juvenile	20 days	donor 6	10XV2	whole testis	postmortem from donor	NA
	ERS2575684	ERR2662669,ERR2662670,ERR2662671,ERR2662672,ERR2662673,ERR2662674,ERR2662675,ERR2662676,ERR2662677,ERR2662678,ERR2662679,ERR2662680,ERR2662681,ERR2662682,ERR2662683,ERR2662684,ERR2662685,ERR2662686,ERR2662687,ERR2662688,ERR2662689,ERR2662690,ERR2662691,ERR2662692,ERR2662693,ERR2662694,ERR2662695,ERR2662696,ERR2662697,ERR2662698,ERR2662699,ERR2662700	PAIRED	juvenile	30 days	donor 7	10XV2	whole testis	postmortem from donor	NA
	ERS2575685	ERR2662701,ERR2662702,ERR2662703,ERR2662704,ERR2662705,ERR2662706,ERR2662707,ERR2662708,ERR2662709,ERR2662710,ERR2662711,ERR2662712,ERR2662713,ERR2662714,ERR2662715,ERR2662716,ERR2662717,ERR2662718,ERR2662719,ERR2662720,ERR2662721,ERR2662722,ERR2662723,ERR2662724,ERR2662725,ERR2662726,ERR2662727,ERR2662728,ERR2662729,ERR2662730,ERR2662731,ERR2662732	PAIRED	juvenile	35 days	donor 8	10XV2	whole testis	postmortem from donor	NA
	ERS2575686	ERR2662733,ERR2662734,ERR2662735,ERR2662736,ERR2662737,ERR2662738,ERR2662739,ERR2662740,ERR2662741,ERR2662742,ERR2662743,ERR2662744,ERR2662745,ERR2662746,ERR2662747,ERR2662748,ERR2662749,ERR2662750,ERR2662751,ERR2662752,ERR2662753,ERR2662754,ERR2662755,ERR2662756,ERR2662757,ERR2662758,ERR2662759,ERR2662760,ERR2662761,ERR2662762,ERR2662763,ERR2662764	PAIRED	juvenile	15 days	donor 9	10XV2	whole testis	postmortem from donor	NA
	ERS2575687	ERR2662765,ERR2662766,ERR2662767,ERR2662768,ERR2662769,ERR2662770,ERR2662771,ERR2662772,ERR2662773,ERR2662774,ERR2662775,ERR2662776,ERR2662777,ERR2662778,ERR2662779,ERR2662780,ERR2662781,ERR2662782,ERR2662783,ERR2662784,ERR2662785,ERR2662786,ERR2662787,ERR2662788,ERR2662789,ERR2662790,ERR2662791,ERR2662792,ERR2662793,ERR2662794,ERR2662795,ERR2662796	PAIRED	juvenile	25 days	donor 10	10XV2	whole testis	postmortem from donor	NA
	ERS3000379	ERR3015753,ERR3015754,ERR3015755,ERR3015756	PAIRED	juvenile	5 days	donor 11	10XV2	whole testis	postmortem from donor	NA
	ERS3000380	ERR3015757,ERR3015758,ERR3015759,ERR3015760	PAIRED	juvenile	5 days	donor 12	10XV2	whole testis	postmortem from donor	NA
Grive 2019	SRS3990943	SRR8958145	PAIRED	juvenile	6 days	donor 1	10XV2	whole testis	postmortem from donor	NA
	SRS3990942	SRR8958146	PAIRED	juvenile	14 days	donor 2	10XV2	whole testis	postmortem from donor	NA
	SRS3990944	SRR8958147	PAIRED	juvenile	18 days	donor 3	10XV2	whole testis	postmortem from donor	NA
	SRS3990945	SRR8958148	PAIRED	juvenile	18 days	donor 3	10XV2	whole testis	postmortem from donor	NA
	SRS3990946	SRR8958149	PAIRED	juvenile	25 days	donor 4	10XV2	whole testis	postmortem from donor	NA
	SRS3990947	SRR8958150	PAIRED	juvenile	30 days	donor 5	10XV2	whole testis	postmortem from donor	NA
	SRS3990948	SRR8958151	PAIRED	adult	8 weeks	donor 6	10XV2	whole testis	postmortem from donor	NA
	SRS3990949	SRR8958152	PAIRED	adult	8 weeks	donor 7	10XV2	whole testis	postmortem from donor	NA
La 2018	SRS3150567	SRR6973074	PAIRED	adult	8-10 weeks	donor 1	10XV3	whole testis	postmortem from donor	NA
	SRS3150566	SRR6973076	PAIRED	adult	8-10 weeks	donor 2	10XV3	whole testis	postmortem from donor	NA
Law 2019	SRS4239093	SRR8427519	PAIRED	embryo	embryonic day 16.5	donor 1	10XV2	whole testis	postmortem from donor	NA
	SRS4239094	SRR8427520	PAIRED	embryo	embryonic day 16.5	donor 1	10XV2	whole testis	postmortem from donor	NA
	SRS4239095	SRR8427521	PAIRED	embryo	embryonic day 16.5	donor 1	10XV2	whole testis	postmortem from donor	NA
Jung 2019	SRS3189004	SRR7026445	PAIRED	adult	3 months 21 days	donor 1	DROPSEQ	whole testis	postmortem from donor	NA
	SRS3189005	SRR7026449	PAIRED	adult	5 months 7 days	donor 2	DROPSEQ	whole testis	postmortem from donor	NA
	SRS3189006	SRR7026451	PAIRED	adult	4 months	donor 3	DROPSEQ	whole testis	postmortem from donor	NA
	SRS3189007	SRR7026450	PAIRED	adult	3 months 27 days	donor 4	DROPSEQ	whole testis	postmortem from donor	NA
	SRS3189008	SRR7026452	PAIRED	adult	3 months 1 day	donor 5	DROPSEQ	whole testis	postmortem from donor	NA
	SRS3189009	SRR7026447	PAIRED	adult	4 months	donor 6	DROPSEQ	whole testis	postmortem from donor	NA
	SRS3189010	SRR7026448	PAIRED	adult	5 months 5 days	donor 7	DROPSEQ	whole testis	postmortem from donor	NA
	SRS3189011	SRR7026453	PAIRED	adult	3 months 2 days	donor 8	DROPSEQ	whole testis	postmortem from donor	NA
	SRS3189012	SRR7026454	PAIRED	adult	9 months 14 days	donor 9	DROPSEQ	whole testis	postmortem from donor	NA
	SRS3189013	SRR7026455	PAIRED	adult	7 months 21 days	donor 10	DROPSEQ	whole testis	postmortem from donor	NA
	SRS3189026	SRR7026446	PAIRED	adult	4 months 2 days	donor 11	DROPSEQ	whole testis	postmortem from donor	NA
Rhesus macaque (Macaca mulatta)
Shami 2020	SRS5883815	SRR10765322,SRR10765323	PAIRED	adult	>= 4 years	donor 1	DROPSEQ	whole testis	postmortem from donor	NA
	SRS5883817	SRR10765326,SRR10765327	PAIRED	adult	9.3 years	donor 2	DROPSEQ	whole testis	postmortem from donor	NA
	SRS5883818	SRR10765328,SRR10765329	PAIRED	adult	7.3 years	donor 3	DROPSEQ	whole testis	postmortem from donor	NA
	SRS5883819	SRR10765330,SRR10765331	PAIRED	adult	7.3 years	donor 3	DROPSEQ	whole testis	postmortem from donor	NA
	SRS5883820	SRR10765332	PAIRED	adult	13 years	donor 4	DROPSEQ	whole testis	postmortem from donor	NA
	SRS5883821	SRR10765333	PAIRED	adult	13 years	donor 4	DROPSEQ	whole testis	postmortem from donor	NA
	SRS5883822	SRR10765334	PAIRED	adult	5.9 years	donor 5	DROPSEQ	whole testis	postmortem from donor	NA
	SRS5883823	SRR10765335	PAIRED	adult	5.9 years	donor 5	DROPSEQ	whole testis	postmortem from donor	NA
Singh 2023	SRS16347195	SRR22963913,SRR22963914,SRR22963916,SRR22963917,SRR22963918,SRR22963919,SRR22963920,SRR22963921,SRR22963922,SRR22963923,SRR22963924,SRR22963925,SRR22963926,SRR22963927,SRR22963928	PAIRED	juvenile	15-20 months	donor 1	10XV2	whole testis	postmortem from donor	NA
	SRS16347199	SRR22963910	PAIRED	juvenile	15-20 months	donor 2	10XV2	whole testis	postmortem from donor	NA
	SRS16347200	SRR22963909	PAIRED	juvenile	15-20 months	donor 2	10XV2	whole testis	postmortem from donor	NA
Cynomolgus (crab-eating) macaque (Macaca fascicularis)
Lau 2020	ERS4527197,ERS4527198,ERS4527199,ERS4527200,ERS4527201,ERS4527202,ERS4527203,ERS4527204,ERS4527205	ERR4058522,ERR4058523,ERR4058524,ERR4058525,ERR4058526,ERR4058527,ERR4058528,ERR4058529,ERR4058530	PAIRED	infant	1 year	donor 1	10XV3	whole testis	postmortem from donor	NA
	ERS4527206,ERS4527207,ERS4527208,ERS4527209,ERS4527210,ERS4527211,ERS4527212,ERS4527213,ERS4527214	ERR4058531,ERR4058532,ERR4058533,ERR4058534,ERR4058535,ERR4058536,ERR4058537,ERR4058538,ERR4058539	PAIRED	juvenile	2 years	donor 2	10XV3	whole testis	postmortem from donor	NA
	ERS4527171,ERS4527172,ERS4527173,ERS4527174,ERS4527175,ERS4527176,ERS4527177,ERS4527178,ERS4527179	ERR4058496,ERR4058497,ERR4058498,ERR4058499,ERR4058500,ERR4058501,ERR4058502,,ERR4058503,ERR4058504	PAIRED	adult	> 4 years	donor 3	10XV3	whole testis	postmortem from donor	NA
	ERS4527180,ERS4527181,ERS4527182,ERS4527183,ERS4527184,ERS4527185,ERS4527186,ERS4527187,ERS4527188	ERR4058505,ERR4058506,ERR4058507,ERR4058508,ERR4058509,ERR4058510,ERR4058511,ERR4058512,ERR4058513	PAIRED	adult	> 4 years	donor 4	10XV3	whole testis	postmortem from donor	NA
Pig
Zhang 2021	SRS9029393	SRR14607453	PAIRED	adult	150 days	donor 1	10XV3	whole testis	postmortem from donor	NA
Rat
Whelan 2022	SRS9839846	SRR15527521,SRR15527522,SRR15527523,SRR15527524	PAIRED	adult	8-10 weeks	donor 1	INDROPSV2	EpCAM+ selected cells	postmortem from donor	NA
	SRS9839847	SRR15527525,SRR15527526,SRR15527527,SRR15527528	PAIRED	adult	8-10 weeks	donor 2	INDROPSV2	EpCAM+ selected cells	postmortem from donor	NA
	SRS9839848	SRR15527529,SRR15527530,SRR15527531,SRR15527532	PAIRED	adult	8-10 weeks	donor 3	INDROPSV2	EpCAM+ selected cells	postmortem from donor	NA
	SRS9839849	SRR15527533,SRR15527534,SRR15527535,SRR15527536	PAIRED	adult	8-10 weeks	donor 4	INDROPSV2	EpCAM+ selected cells	postmortem from donor	NA
	SRS9839850	SRR15527537,SRR15527538,SRR15527539,SRR15527540	PAIRED	adult	8-10 weeks	donor 5	INDROPSV2	EpCAM+ selected cells	postmortem from donor	NA
	SRS9839851	SRR15527541,SRR15527542,SRR15527543,SRR15527544,SRR15527545,SRR15527546,SRR15527547,SRR15527548	PAIRED	adult	8-10 weeks	donor 6	INDROPSV2	EpCAM+ selected cells	postmortem from donor	NA
	SRS9839852	SRR15527549,SRR15527550,SRR15527551,SRR15527552	PAIRED	adult	8-10 weeks	donor 7	INDROPSV2	EpCAM+ selected cells	postmortem from donor	NA
	SRS9839853	SRR15527553,SRR15527554,SRR15527555,SRR15527556	PAIRED	adult	8-10 weeks	donor 8	INDROPSV2	EpCAM+ selected cells	postmortem from donor	NA
Sheep
Yang 2021	SRS7528324	SRR12837076	PAIRED	adult	1.5 years	donor 1	10XV3	whole testis	postmortem from donor	NA
Buffalo
Huang 2023	SRS11257878	SRR17169788,SRR17169789,SRR17169790,SRR17169791	PAIRED	pre-puberty	3 months	donor 1	10XV3	whole testis	postmortem from donor	NA
	SRS11257879	SRR17169792,SRR17169793,SRR17169794,SRR17169795	PAIRED	peri-puberty	2 years	donor 2	10XV3	whole testis	postmortem from donor	NA

## Sheet: Supplementary Table 3
Supplementary Table 3. Number of cells, genes, and average genes per cell, per sample.
Sample ID	Publication	Total no. of cells in original sample (unfiltered by KB)	No. of cells passing KB internal filters (this number used as basis of subsequent percentages)	No. of cells with <= 1000 genes	% of cells with <= 1000 genes	No. of cells with >= 10,000 genes	% of cells with >= 10,000 genes	No. of cells with <= 2000 UMIs	% of cells with <= 2000 UMIs	No. of cells with >= 50,000 UMIs	% of cells with >= 50,000 UMIs	No. of cells with >= 5% MT UMIs	% of cells with >= 5% MT UMIs	No. of cells passing all QC filters (10,000 > genes > 1000 and 50,000 > UMIs > 2000 and < 5% MT)	% of cells passing all QC filters (10,000 > genes > 1000 and 50,000 > UMIs > 2000 and < 5% MT)	No. of genes in >= 3 cells passing all QC filters	Minimum genes/cell in integrated dataset	Mean genes/cell in integrated dataset	Median genes/cell in integrated dataset	Maximum genes/cell in integrated dataset
LZ003	Zhao 2020	210970	1409	596	42.3	12	0.85	514	36.48	266	18.88	46	3.26	436	30.94	23314	1002	3586	3403	6852
LZ007		2036664	11835	3071	25.95	338	2.86	3353	28.33	557	4.71	4021	33.98	4453	37.63	37641	1001	4218	4169	9978
LZ016		1785899	8622	2501	29.01	209	2.42	3349	38.84	340	3.94	2067	23.97	2115	24.53	34651	1040	4570	3228	9951
OES026004	Chen 2020	3148	2658	1066	40.11	0	0	1600	60.2	0	0	1244	46.8	511	19.22	15909	1078	1806	1643	3931
SRS2823407	Hermann 2018	415747	5569	1969	35.36	32	0.57	2025	36.36	85	1.53	1009	18.12	2224	39.94	32584	1001	3661	2994	9776
SRS2823408		509229	3849	8	0.21	108	2.81	0	0	240	6.24	1994	51.81	1597	41.49	34003	1003	4550	4288	9917
SRS2823409		480206	5559	1400	25.18	86	1.55	1724	31.01	214	3.85	1236	22.23	2460	44.25	34118	1002	3906	3329	9855
SRS3065428	Guo 2018	342669	5288	1017	19.23	6	0.11	986	18.65	12	0.23	1827	34.55	906	17.13	26317	1001	2384	1960	9553
SRS3065429		359817	5780	1192	20.62	27	0.47	1068	18.48	55	0.95	1710	29.58	1005	17.39	28368	1005	3166	2400	9967
SRS3065430		409606	7401	1843	24.9	15	0.2	1515	20.47	23	0.31	2662	35.97	883	11.93	25862	1003	2755	2056	9433
SRS4181127	Sohni 2019	404426	5875	563	9.58	0	0	781	13.29	0	0	1126	19.17	4150	70.64	31981	1005	2383	2115	8400
SRS4181130		501621	9557	1352	14.15	0	0	1902	19.9	0	0	5438	56.9	3151	32.97	32518	1002	2578	2106	8538
SRS5086063	Guo 2020	354566	3453	974	28.21	2	0.06	1063	30.78	4	0.12	1081	31.31	1270	36.78	28671	1003	2560	2134	8982
SRS5086064		330419	4500	1425	31.67	2	0.04	1472	32.71	2	0.04	1784	39.64	1003	22.29	27783	1001	2644	2170	9882
SRS5883810	Shami 2020	4846	2839	1363	48.01	0	0	1533	54	0	0	315	11.1	599	21.1	19339	1001	1583	1485	4795
SRS5883811		4765	2220	1150	51.8	0	0	1300	58.56	0	0	237	10.68	381	17.16	16707	1001	1603	1487	3295
SRS5883812		2095	1290	610	47.29	0	0	771	59.77	0	0	288	22.33	200	15.5	12868	1058	1714	1613	2911
SRS5883813		14449	1834	720	39.26	0	0	871	47.49	0	0	484	26.39	542	29.55	21373	1019	2009	1835	4610
SRS5883814		7840	4218	1221	28.95	0	0	1397	33.12	0	0	1281	30.37	484	11.47	21475	1006	2334	2090	5603
SRS5883824		1220	721	51	7.07	0	0	121	16.78	0	0	166	23.02	446	61.86	21044	1005	2369	2151	5617
SRS5883825		2335	1181	129	10.92	0	0	294	24.89	0	0	275	23.29	670	56.73	23073	1001	2264	2119	6238
SRS5883826		1733	700	201	28.71	0	0	335	47.86	0	0	85	12.14	312	44.57	17560	1011	2070	1892	4773
SRS6959440	Di Persio 2021	623413	37775	14761	39.08	1	0	17622	46.65	3	0.01	251	0.66	6161	16.31	32747	1006	2337	1965	8041
SRS6959441		658885	8688	1908	21.96	5	0.06	1886	21.71	76	0.87	582	6.7	5851	67.35	36400	1001	3692	3717	9089
SRS6959442		590004	7671	1759	22.93	3	0.04	2154	28.08	30	0.39	1139	14.85	4459	58.13	35249	1002	3434	3186	9412
SRS9921715	Nie 2022	1187808	5626	1527	27.14	48	0.85	1458	25.92	112	1.99	2217	39.41	1124	19.98	28728	1009	3302	2596	9979
SRS9921716		1756944	6370	1564	24.55	97	1.52	1496	23.49	141	2.21	2343	36.78	2013	31.6	31841	1003	3094	2318	9925
SRS9921717		1562561	7706	1626	21.1	73	0.95	1503	19.5	115	1.49	4054	52.61	891	11.56	27226	1008	2856	2247	9580
SRS9921718		264247	2161	762	35.26	0	0	772	35.72	0	0	764	35.35	160	7.4	13482	1001	2131	1772	9494
SRS9921719		1607271	10152	2355	23.2	153	1.51	2222	21.89	178	1.75	3578	35.24	1583	15.59	30261	1003	2760	2188	9987
SRS9921720		1550451	6865	1489	21.69	99	1.44	1234	17.98	254	3.7	2269	33.05	2282	33.24	33329	1002	3389	2798	9937
SRS9921721		1660670	7569	1763	23.29	294	3.88	1604	21.19	332	4.39	3387	44.75	1956	25.84	32510	1002	3243	2492	9922
SRS9921722		1827986	8857	1895	21.4	260	2.94	1750	19.76	350	3.95	3632	41.01	2178	24.59	33703	1006	3534	2622	9973
SRS9921723		1513787	6427	1236	19.23	90	1.4	1007	15.67	159	2.47	2027	31.54	1971	30.67	32693	1003	3334	2673	9954
		Total	212225	57067		1960		62682		3548		56619		60427			Mean	2877.03

## Sheet: Supplementary Table 4
Supplementary Table 4. Cell and spermatogonial cell state biomarkers.
Gene	Cell type / state	Reference(s)
				Notes on the selection of biomarkers.
APBB1	State 0	Guo 2018		Guo 2018: each of 5 adult SSC states (termed states 0, 1, 2, 3, and 4) were identified on the basis of the top 25 candidate biomarkers shown at https://humantestisatlas.shinyapps.io/humantestisatlas1/, the interactive browser for this dataset. For each of the 5 states, Seurat differential expression tables were sorted in descending order from the highest avg_diff (average log2 fold change of diff…
AZU1	State 0	Guo 2018		For inclusion in this table, we required that all genes were significantly differentially expressed (adj. p < 0.05) between states and that the absolute difference in the % of cells expressing that gene in state x, when compared to all other states was, at minimum, 30%.
C19orf84	State 0	Guo 2018
CDK17	State 0	Guo 2018		Sohni 2019: the majority of the somatic and germ cell biomarkers, adult and prepubertal, are listed in Table S2 of this paper. In adult testes, the authors identify four undifferentiated spermatogonia (SPG) clusters, each of which expresses specific marker genes. These are referred to as "SSC-1", "SSC-2", "Early diff-SPG" and "Diff-SPG". The SSC-1 cells could be sub-clustered into three states: S…
CNN1	State 0	Guo 2018
DPPA2	State 0	Guo 2018		Di Persio 2021: 36 biomarkers spanning 6 adult SSC states (State 0, 0A, 0B, 1, 2, and 3) were obtained from Figure S5B of the Di Persio 2021 paper (https://doi.org/10.1016/j.xcrm.2021.100395).
DUSP5	State 0	Guo 2018
EGR4	State 0	Guo 2018		Dominguez 2018: 67 cell cycle-phase associated biomarkers (16 G1/S and 51 G2/M) were obtained from Table S2 of the Dominguez 2018 paper (https://doi.org/10.1038/cr.2016.84).
FAM150B	State 0	Guo 2018
ID1	State 0	Guo 2018		The aforementioned three testes studies reinforce each other by defining analogous cell states, albeit with varying nomenclature.
ID4	State 0	Guo 2018		As noted by Di Persio 2021 (and shown in their Figures S5C and S5D), there are significant correlations between the adult SSC states independently defined by Guo 2018, Sohni 2019, and Di Persio 2021. Their correspondence is as follows:
KRT18	State 0	Guo 2018
MSL3	State 0	Guo 2018			Guo 2018	Sohni 2019	Di Persio 2021	Marker genes
PHGDH	State 0	Guo 2018			State 0	SSC-1B	State 0	C19orf84, EGR4, MAGEA4, PIWIL4, TSPAN33, UTF1
PIWIL4	State 0	Guo 2018			State 0	SSC-1A	State 0A	FGFR3, MAGEA4, UTF1
PMAIP1	State 0	Guo 2018			State 0	SSC-1C	State 0B	MAGEA4, NANOS2, UTF1
RPL22L1	State 0	Guo 2018			State 1	SSC-2	State 1	GFRA1, MAGEA4, NANOS3, UTF1
RPS4X	State 0	Guo 2018			State 2	Diff SPG	State 2	DMRT1, DNMT1, KIT, MAGEA4, MKI67, SOHLH2
SCT	State 0	Guo 2018			State 3	.	State 2	MAGE4, REC8, STRA8
SIX1	State 0	Guo 2018			State 4	.	State 3	.
ST3GAL4	State 0	Guo 2018
TCF3	State 0	Guo 2018		The key marker genes for each of these states are taken from Table 1 of Di Persio and Neuhaus 2023 (https://doi.org/10.1093/humrep/deac245).
TUBA1A	State 0	Guo 2018		Note that the population labelled in Guo 2018 as “state 4” and in Di Persio 2021 as “state 3” does not appear in Table 1 of Di Persio and Neuhaus 2023 and does not seem to have much subsequent support as a distinct population; rather, these cells appear to be be differentiating spermatogonia and the “state 4” distinction a possible clustering artefact.
UTF1	State 0	Guo 2018
VIM	State 0	Guo 2018		Diagnostic markers of the apex of the spermatogenic trajectory (i.e. for SSCs which have not initiated differentiation) can also be found in Shami 2020 (https://doi.org/10.1016/j.devcel.2020.05.010) and in Singh and Hermann 2023 (https://doi.org/10.3390/ijms24054755). These are:
ADAMTS6	State 1	Guo 2018		Singh and Hermann 2023: EXOSC10+ FGFR3+ MKI67- DMRT1-
AES	State 1	Guo 2018		Shami 2020: MORC1+ MSL3+ ZBTB43+ TSPAN33+ TCF3+ FMR1+ MAGEB2+ CDK17+
ASB9	State 1	Guo 2018		The Shami 2020 genes are markers of "SPG1", derived in this paper as a consensus spermatogonial state conserved in mice, monkeys and humans. 1153 genes differentially enriched in SPG1 are listed in Table S3, sheet B, of their publication, of which the eight listed here are prominent examples given in their Figure 2E.
CITED2	State 1	Guo 2018		Note that all of these eight genes are differentially expressed in State 0 of the SPG atlas (Supplementary Table 7), and that with the exception of FMR1 all are also differentially expressed in State 0B.
DPPA4	State 1	Guo 2018
ETV5	State 1	Guo 2018
FAM25G	State 1	Guo 2018
FARP1	State 1	Guo 2018
FOXP1	State 1	Guo 2018
GFRA1	State 1	Guo 2018
ID1	State 1	Guo 2018
ID4	State 1	Guo 2018
IRF2BPL	State 1	Guo 2018
L1TD1	State 1	Guo 2018
MEF2C	State 1	Guo 2018
MEX3B	State 1	Guo 2018
NANOS3	State 1	Guo 2018
PTPRS	State 1	Guo 2018
RGS10	State 1	Guo 2018
SEPP1	State 1	Guo 2018
SOCS1	State 1	Guo 2018
STK24	State 1	Guo 2018
TMEM55A	State 1	Guo 2018
TUBB	State 1	Guo 2018
ZNF462	State 1	Guo 2018
ASPM	State 2	Guo 2018
BIRC5	State 2	Guo 2018
CCNA2	State 2	Guo 2018
CDCA5	State 2	Guo 2018
CDK1	State 2	Guo 2018
CDT1	State 2	Guo 2018
CENPA	State 2	Guo 2018
CHAF1A	State 2	Guo 2018
DHFR	State 2	Guo 2018
DIAPH3	State 2	Guo 2018
DNMT1	State 2	Guo 2018
ESCO2	State 2	Guo 2018
FBXO5	State 2	Guo 2018
MKI67	State 2	Guo 2018
NCAPG	State 2	Guo 2018
NUF2	State 2	Guo 2018
RRM2	State 2	Guo 2018
SNRNP25	State 2	Guo 2018
SPC25	State 2	Guo 2018
TK1	State 2	Guo 2018
TUBA3D	State 2	Guo 2018
TYMS	State 2	Guo 2018
UBE2C	State 2	Guo 2018
UHRF1	State 2	Guo 2018
ZWINT	State 2	Guo 2018
AC240274.1	State 3	Guo 2018
ACRC	State 3	Guo 2018
AURKB	State 3	Guo 2018
BIRC5	State 3	Guo 2018
BOLA3	State 3	Guo 2018
BUB1B	State 3	Guo 2018
CCNA2	State 3	Guo 2018
CDK1	State 3	Guo 2018
CDKN2D	State 3	Guo 2018
CHCHD10	State 3	Guo 2018
GTSE1	State 3	Guo 2018
HMMR	State 3	Guo 2018
HORMAD1	State 3	Guo 2018
MKI67	State 3	Guo 2018
NCAPG	State 3	Guo 2018
NUF2	State 3	Guo 2018
NUSAP1	State 3	Guo 2018
PGRMC1	State 3	Guo 2018
PLK1	State 3	Guo 2018
PRSS21	State 3	Guo 2018
RRM2	State 3	Guo 2018
SHCBP1	State 3	Guo 2018
SPC25	State 3	Guo 2018
SSX3	State 3	Guo 2018
UBE2C	State 3	Guo 2018
BHMG1	State 4	Guo 2018
BOLL	State 4	Guo 2018
C15orf48	State 4	Guo 2018
CT55	State 4	Guo 2018
CTCFL	State 4	Guo 2018
EMC7	State 4	Guo 2018
ETV7	State 4	Guo 2018
F12	State 4	Guo 2018
HBQ1	State 4	Guo 2018
HDDC3	State 4	Guo 2018
HORMAD1	State 4	Guo 2018
KRTCAP3	State 4	Guo 2018
MED30	State 4	Guo 2018
MEIOC	State 4	Guo 2018
PEG10	State 4	Guo 2018
PPP1R14A	State 4	Guo 2018
PRSS21	State 4	Guo 2018
PRSS50	State 4	Guo 2018
REC8	State 4	Guo 2018
SAR1B	State 4	Guo 2018
SCML1	State 4	Guo 2018
SELT	State 4	Guo 2018
TCL1A	State 4	Guo 2018
TEX101	State 4	Guo 2018
TEX19	State 4	Guo 2018
C19orf64	State 0	Di Persio 2021
CELF4	State 0	Di Persio 2021
EGR4	State 0	Di Persio 2021
FSD1	State 0	Di Persio 2021
LIN7B	State 0	Di Persio 2021
MSL3	State 0	Di Persio 2021
PHGDH	State 0	Di Persio 2021
PIWIL4	State 0	Di Persio 2021
SH2B2	State 0	Di Persio 2021
ST3GAL4	State 0	Di Persio 2021
TAF6	State 0	Di Persio 2021
TSPAN33	State 0	Di Persio 2021
BAG6	State 0A	Di Persio 2021
FGFR3	State 0A	Di Persio 2021
SERPINE2	State 0A	Di Persio 2021
SRRT	State 0A	Di Persio 2021
UTF1	State 0A	Di Persio 2021
DND1	State 0B	Di Persio 2021
NANOS2	State 0B	Di Persio 2021
PELP1	State 0B	Di Persio 2021
ASB9	State 1	Di Persio 2021
C1QBP	State 1	Di Persio 2021
GFRA1	State 1	Di Persio 2021
GFRA2	State 1	Di Persio 2021
ID2	State 1	Di Persio 2021
ID4	State 1	Di Persio 2021
L1TD1	State 1	Di Persio 2021
NANOS3	State 1	Di Persio 2021
CALR	State 2	Di Persio 2021
DMNT1	State 2	Di Persio 2021
DMRT1	State 2	Di Persio 2021
KIT	State 2	Di Persio 2021
MKI67	State 2	Di Persio 2021
PDPN	State 2	Di Persio 2021
STRA8	State 3	Di Persio 2021
SYCP3	State 3	Di Persio 2021
C19orf84	SSC	Sohni 2019
CPEB1	SSC	Sohni 2019
EGR4	SSC	Sohni 2019
ENHO	SSC	Sohni 2019
FSD1	SSC	Sohni 2019
LIN7B	SSC	Sohni 2019
LPPR5	SSC	Sohni 2019
MAGEB2	SSC	Sohni 2019
MORC1	SSC	Sohni 2019
MSL3	SSC	Sohni 2019
NOC4L	SSC	Sohni 2019
PIWIL4	SSC	Sohni 2019
PODXL2	SSC	Sohni 2019
PTRHD1	SSC	Sohni 2019
RAC3	SSC	Sohni 2019
RGS14	SSC	Sohni 2019
SH2B2	SSC	Sohni 2019
STK31	SSC	Sohni 2019
SURF2	SSC	Sohni 2019
TCF3	SSC	Sohni 2019
UTF1	SSC	Sohni 2019
C1QBP	SSC-1	Sohni 2019
CELF4	SSC-1	Sohni 2019
EGR4	SSC-1	Sohni 2019
FGFR3	SSC-1	Sohni 2019
FSD1	SSC-1	Sohni 2019
LIN7B	SSC-1	Sohni 2019
LPPR3	SSC-1	Sohni 2019
PIWIL4	SSC-1	Sohni 2019
TSPAN33	SSC-1	Sohni 2019
A2M	SSC-1A	Sohni 2019
ENO3	SSC-1A	Sohni 2019
ID2	SSC-1A	Sohni 2019
SERPINE2	SSC-1A	Sohni 2019
C19orf84	SSC-1B	Sohni 2019
EGR4	SSC-1B	Sohni 2019
FSD1	SSC-1B	Sohni 2019
LPPR3	SSC-1B	Sohni 2019
MSL3	SSC-1B	Sohni 2019
PHGDH	SSC-1B	Sohni 2019
PIWIL4	SSC-1B	Sohni 2019
SH2B2	SSC-1B	Sohni 2019
SRRT	SSC-1B	Sohni 2019
ST3GAL4	SSC-1B	Sohni 2019
NANOS2	SSC-1C	Sohni 2019
ASB9	SSC-2	Sohni 2019
L1TD1	SSC-2	Sohni 2019
BCL6B	Early diff SPG	Sohni 2019
FGFR3	Early diff SPG	Sohni 2019
ID4	Early diff SPG	Sohni 2019
LIN28	Early diff SPG	Sohni 2019
SALL4	Early diff SPG	Sohni 2019
UTF1	Early diff SPG	Sohni 2019
ZBTB16	Early diff SPG	Sohni 2019
KIT	Diff SPG	Sohni 2019
SOHLH1	Diff SPG	Sohni 2019
SOHLH2	Diff SPG	Sohni 2019
DMRT1	Diff SPG	Sohni 2019
STRA8	Diff SPG	Sohni 2019
ATM	Spermatogonia	Sohni 2019
BRCA1	Spermatogonia	Tan 2020
CHEK1	Spermatogonia	Sohni 2019, Tan 2020
DMC1	Spermatogonia	Sohni 2019, Guo 2020
DMRT1	Spermatogonia	Laurentino 2019
DMRTB1	Spermatogonia	Tan 2020
KIT	Spermatogonia	Sohni 2019
MAGEA4	Spermatogonia	Sohni 2019
MLH3	Spermatogonia	Guo 2020
ACCROSIN	Spermatocyte	Sohni 2019
NME8	Spermatocyte	Guo 2018
OVOL2	Spermatocyte	Guo 2018
RAD51	Spermatocyte	Sohni 2019
REC8	Spermatocyte	Sohni 2019
RHOXF1	Spermatocyte	Guo 2018
RHOXF2	Spermatocyte	Guo 2018
SOHLH1	Spermatocyte	Guo 2018
SOHLH2	Spermatocyte	Wang 2018
SPO11	Spermatocyte	Wang 2018, Sohni 2019
STRA8	Spermatocyte	Guo 2018, Sohni 2019, Wang 2018
SYCP1	Spermatocyte	Guo 2018, Sohni 2019
SYCP2	Spermatocyte	Guo 2018
SYCP3	Spermatocyte	Guo 2018, Sohni 2019, Guo 2020
CAMK4	Spermatid	Guo 2018
CATSPER1	Spermatid	Guo 2018
CATSPER2	Spermatid	Guo 2018
CREM	Spermatid	Guo 2018
DNAH6	Spermatid	Guo 2018
DNAH7	Spermatid	Guo 2018
DNAH14	Spermatid	Guo 2018
PRM1	Spermatid	Sohni 2019
PRM2	Spermatid	Sohni 2019
PRM3	Spermatid	Guo 2020
SPAG6	Spermatid	Guo 2018
TNP1	Spermatid	Sohni 2019
TNP2	Spermatid	Sohni 2019
TXNDC2	Spermatid	Wang 2018
ZPBP	Spermatid	Guo 2018
ZPBP2	Spermatid	Guo 2018
HOOK1	Spermatozoa	Guo 2018
PRM2	Spermatozoa	Guo 2018
SHBG	Spermatozoa	Guo 2018
SPATA7	Spermatozoa	Guo 2018
SPATA12	Spermatozoa	Guo 2018
SPATA18	Spermatozoa	Guo 2018
SPATA20	Spermatozoa	Guo 2018
SPATA32	Spermatozoa	Guo 2018
SPATA33	Spermatozoa	Guo 2018
SRD5A2	Spermatozoa	Guo 2018
TNP1	Spermatozoa	Guo 2018
TNP2	Spermatozoa	Guo 2018
ARX	Leydig cell	Li 2017
CYP1B1	Leydig cell	Sohni 2019
DCN	Leydig cell	Sohni 2019
DLK1	Leydig cell	Wang 2018, Guo 2018
HSD3B1	Leydig cell	Sohni 2019
IGF1	Leydig cell	Guo 2018, Guo 2020
IGF2	Leydig cell	Sohni 2019
IGFBP3	Leydig cell	Guo 2018
IGFBP5	Leydig cell	Guo 2018
INHBA	Leydig cell	Guo 2018, Sohni 2019
INSL3	Leydig cell	Sohni 2019
LHX9	Leydig cell	Sohni 2019
SF1	Leydig cell	Sohni 2019
STAR	Leydig cell	Sohni 2019
PTGDS	Leydig cell	Sohni 2019
VIT	Leydig cell	Guo 2018
AMH	Sertoli cell	Li 2017, Wang 2018, Sohni 2019
BEX1	Sertoli cell	Sohni 2019
CITED	Sertoli cell	Sohni 2019
FGF1	Sertoli cell	Wang 2018
GATA1	Sertoli cell	Sohni 2019
GATA4	Sertoli cell	Sohni 2019
INHA	Sertoli cell	Sohni 2019
INHBB	Sertoli cell	Sohni 2019
SOX4	Sertoli cell	Sohni 2019
SOX9	Sertoli cell	Wang 2018, Sohni 2019, Guo 2020
WT1	Sertoli cell	Li 2017
ACTA2	Myoid cell	Wang 2018, Guo 2020
AEBP1	Myoid cell	Sohni 2019
CNN1	Myoid cell	Sohni 2019
MYH11	Myoid cell	Wang 2018, Sohni 2019
PTCH1	Myoid cell	Sohni 2019
SMA	Myoid cell	Sohni 2019
TAGLN	Myoid cell	Sohni 2019
TPM1	Myoid cell	Sohni 2019
WNT2B	Myoid cell	Guo 2018
CD34	Endothelial cell	Sohni 2019
MAML1	Endothelial cell	Guo 2018
PDGFB	Endothelial cell	Guo 2018
VWF	Endothelial cell	Guo 2018, Guo 2020
AIF1	Macrophage	Sohni 2019
C1QA	Macrophage	Guo 2018
CD14	Macrophage	Guo 2018, Guo 2020
CD163	Macrophage	Guo 2018
CD168	Macrophage	Wang 2018
CD68	Macrophage	Wang 2018
CSF1R	Macrophage	Guo 2018
CXCR4	Macrophage	Guo 2018
CCNE1	G1/S	Dominguez 2018
CCNE2	G1/S	Dominguez 2018
CDC6	G1/S	Dominguez 2018
CHAF1A	G1/S	Dominguez 2018
DTL	G1/S	Dominguez 2018
E2F1	G1/S	Dominguez 2018
EXO1	G1/S	Dominguez 2018
HSPB8	G1/S	Dominguez 2018
MCM2	G1/S	Dominguez 2018
MCM6	G1/S	Dominguez 2018
PASK	G1/S	Dominguez 2018
PCNA	G1/S	Dominguez 2018
POLD3	G1/S	Dominguez 2018
RFC4	G1/S	Dominguez 2018
SLBP	G1/S	Dominguez 2018
UNG	G1/S	Dominguez 2018
ARHGAP11A	G2/M	Dominguez 2018
BIRC5	G2/M	Dominguez 2018
BRD8	G2/M	Dominguez 2018
BUB1	G2/M	Dominguez 2018
BUB1B	G2/M	Dominguez 2018
BUB3	G2/M	Dominguez 2018
CCNA2	G2/M	Dominguez 2018
CCNB1	G2/M	Dominguez 2018
CCNB2	G2/M	Dominguez 2018
CCNF	G2/M	Dominguez 2018
CDC20	G2/M	Dominguez 2018
CDC25B	G2/M	Dominguez 2018
CDC25C	G2/M	Dominguez 2018
CDCA3	G2/M	Dominguez 2018
CDCA8	G2/M	Dominguez 2018
CENPE	G2/M	Dominguez 2018
CENPF	G2/M	Dominguez 2018
CKAP2	G2/M	Dominguez 2018
CKS1B	G2/M	Dominguez 2018
CKS2	G2/M	Dominguez 2018
ESPL1	G2/M	Dominguez 2018
FAM64A	G2/M	Dominguez 2018
GPR126	G2/M	Dominguez 2018
GPSM2	G2/M	Dominguez 2018
GTSE1	G2/M	Dominguez 2018
H2AFX	G2/M	Dominguez 2018
HMGB2	G2/M	Dominguez 2018
HMGB3	G2/M	Dominguez 2018
HMMR	G2/M	Dominguez 2018
KIF11	G2/M	Dominguez 2018
KIF22	G2/M	Dominguez 2018
KIF23	G2/M	Dominguez 2018
KIF2C	G2/M	Dominguez 2018
KPNA2	G2/M	Dominguez 2018
LBR	G2/M	Dominguez 2018
MKI67	G2/M	Dominguez 2018
NDE1	G2/M	Dominguez 2018
NEK2	G2/M	Dominguez 2018
NUSAP1	G2/M	Dominguez 2018
PLK1	G2/M	Dominguez 2018
PRC1	G2/M	Dominguez 2018
PTTG1	G2/M	Dominguez 2018
SFPQ	G2/M	Dominguez 2018
SPAG5	G2/M	Dominguez 2018
TACC3	G2/M	Dominguez 2018
TOP2A	G2/M	Dominguez 2018
TPX2	G2/M	Dominguez 2018
TROAP	G2/M	Dominguez 2018
TTK	G2/M	Dominguez 2018
UBE2C	G2/M	Dominguez 2018
UBE2S	G2/M	Dominguez 2018

## Sheet: Supplementary Table 5
Supplementary Table 5. Adult human testis expression atlas.
This table incorporates the output of Seurat's FindAllMarkers function, an all-against-all differential expression analysis for the adult human testis atlas.
For inclusion in this table, Seurat's default parameters are applied, which require that each gene be identified in > 25% of the cells in a given cluster, that the log2 fold change of the average expression between the two groups (i.e. cluster X and all other clusters, taken together) is > 0.25 and that the difference is statistically significant (Wilcoxon rank sum test p < 0.05). We also set the…
Note that for genes differentially expressed in multiple clusters relative to all other clusters, the Seurat output is presented on one line, delimited by pipes. Results are filtered to retain only those genes with a Bonferroni-corrected adjusted p-value < 0.05.
Gene name (given as name/Ensembl ID if not unique)	Ensembl gene ID	Gene description	Gene type	Location	Number of CLUSTER 9 (SERTOLI) cells in which this gene is detected	Number of CLUSTER 3 (MYOID/LEYDIG) cells in which this gene is detected	Number of CLUSTER 7 (ENDOTHELIA/MACROPHAGE) cells in which this gene is detected	Number of CLUSTER 6 (UNDIFF SPG) cells in which this gene is detected	Number of CLUSTER 8 (DIFF SPG/EARLY MEIOSIS) cells in which this gene is detected	Number of CLUSTER 4 (SPERMATOCYTE) cells in which this gene is detected	Number of CLUSTER 1 (EARLY SPERMATID 1) cells in which this gene is detected	Number of CLUSTER 2 (EARLY SPERMATID 2) cells in which this gene is detected	Number of CLUSTER 0 (LATE SPERMATID 1) cells in which this gene is detected	Number of CLUSTER 5 (LATE SPERMATID 2) cells in which this gene is detected	Total number of cells in which this gene is detected	% of cells in which this gene is detected	% of CLUSTER 9 (SERTOLI) cells in which this gene is detected	% of CLUSTER 3 (MYOID/LEYDIG) cells in which this gene is detected	% of CLUSTER 7 (ENDOTHELIA/MACROPHAGE) cells in which this gene is detected	% of CLUSTER 6 (UNDIFF SPG) cells in which this gene is detected	% of CLUSTER 8 (DIFF SPG/EARLY MEIOSIS) cells in which this gene is detected	% of CLUSTER 4 (SPERMATOCYTE) cells in which this gene is detected	% of CLUSTER 1 (EARLY SPERMATID 1) cells in which this gene is detected	% of CLUSTER 2 (EARLY SPERMATID 2) cells in which this gene is detected	% of CLUSTER 0 (LATE SPERMATID 1) cells in which this gene is detected	% of CLUSTER 5 (LATE SPERMATID 2) cells in which this gene is detected	Avg. expression across all CLUSTER 9 (SERTOLI) cells	Avg. expression across all CLUSTER 3 (MYOID/LEYDIG) cells	Avg. expression across all CLUSTER 7 (ENDOTHELIA/MACROPHAGE) cells	Avg. expression across all CLUSTER 6 (UNDIFF SPG) cells	Avg. expression across all CLUSTER 8 (DIFF SPG/EARLY MEIOSIS) cells	Avg. expression across all CLUSTER 4 (SPERMATOCYTE) cells	Avg. expression across all CLUSTER 1 (EARLY SPERMATID 1) cells	Avg. expression across all CLUSTER 2 (EARLY SPERMATID 2) cells	Avg. expression across all CLUSTER 0 (LATE SPERMATID 1) cells	Avg. expression across all CLUSTER 5 (LATE SPERMATID 2) cells	Number of clusters in which this gene is differentially expressed	Cluster(s)	Proportion of cells expressing this gene in this cluster	Proportion of cells expressing this gene in all other clusters	Absolute difference in proportion of cells expressing this gene in this cluster versus all other clusters	Maximum absolute difference in proportion of cells expressing this gene in this cluster versus all other clusters	avg. log2 fold change	p-value	adj. p-value	Cell type for which this gene is a candidate biomarker (criteria: differentially expressed only in this cell type)	Is this gene DE in CLUSTER 9 (SERTOLI)?	Is this gene DE in CLUSTER 3 (MYOID/LEYDIG)?	Is this gene DE in CLUSTER 7 (ENDOTHELIA/MACROPHAGE)?
5-8S-rRNA/ENSG00000283568	ENSG00000283568	5.8S ribosomal RNA [Source:RFAM;Acc:RF00002]	rRNA	20:29297095-29297246:-1	0	0	0	0	0	0	0	0	0	0	0	0	0	0	0	0	0	0	0	0	0	0	0	0	0	0	0	0	0	0	0	0	0	.	.	.	.	.	.	.	.	.	no	no	no
5S-rRNA/ENSG00000277411	ENSG00000277411	5S ribosomal RNA [Source:RFAM;Acc:RF00001]	rRNA	6:15522195-15522300:-1	0	0	0	0	0	1	3	2	1	0	7	0.012	0	0	0	0	0	0.015	0.026	0.025	0.007	0	0	0	0	0	0	0.00012	9e-05	0.00041	0.00029	0	0	.	.	.	.	.	.	.	.	.	no	no	no
5S-rRNA/ENSG00000285609	ENSG00000285609	5S ribosomal RNA [Source:RFAM;Acc:RF00001]	rRNA_pseudogene	1:182944365-182944490:-1	0	0	0	0	0	1	0	1	0	0	2	0.003	0	0	0	0	0	0.015	0	0.012	0	0	0	0	0	0	0	5e-05	0	8e-05	0	0	0	.	.	.	.	.	.	.	.	.	no	no	no
5S-rRNA/ENSG00000285626	ENSG00000285626	5S ribosomal RNA [Source:RFAM;Acc:RF00001]	rRNA_pseudogene	2:11561661-11561779:-1	0	6	0	0	0	0	0	0	0	0	6	0.01	0	0.081	0	0	0	0	0	0	0	0	0	0.00161	0	0	0	0	0	0	0	0	0	.	.	.	.	.	.	.	.	.	no	no	no
5S-rRNA/ENSG00000285776	ENSG00000285776	5S ribosomal RNA [Source:RFAM;Acc:RF00001]	rRNA_pseudogene	X:69672479-69672597:1	0	3	2	1	0	0	4	1	1	0	12	0.02	0	0.04	0.067	0.03	0	0	0.035	0.012	0.007	0	0	0.00085	0.00076	0.00035	0	0	0.00061	0.00015	1e-05	0	0	.	.	.	.	.	.	.	.	.	no	no	no
5S-rRNA/ENSG00000285912	ENSG00000285912	5S ribosomal RNA [Source:RFAM;Acc:RF00001]	rRNA_pseudogene	7:152592973-152593091:-1	0	0	0	1	1	0	1	1	0	1	5	0.008	0	0	0	0.03	0.037	0	0.009	0.012	0	0.03	0	0	0	0.0007	0.00023	0	3e-05	0.00026	0	0.00028	0	.	.	.	.	.	.	.	.	.	no	no	no
5S-rRNA/ENSG00000288601	ENSG00000288601	5S ribosomal RNA [Source:RFAM;Acc:RF00001]	rRNA_pseudogene	16:47450347-47450461:-1	0	0	0	0	0	0	7	8	0	0	15	0.025	0	0	0	0	0	0	0.061	0.1	0	0	0	0	0	0	0	0	0.00047	0.00093	0	0	0	.	.	.	.	.	.	.	.	.	no	no	no
7SK/ENSG00000202198	ENSG00000202198	7SK RNA [Source:RFAM;Acc:RF00100]	misc_RNA	6:52995620-52995950:1	13	309	236	35	93	550	1390	974	1436	127	5163	8.544	3.21	4.165	7.962	1.061	3.407	8.192	12.048	12.126	10.255	3.82	0.10153	0.12235	0.12002	0.01861	0.0611	0.08159	0.19869	0.37865	0.33857	0.15233	0	.	.	.	.	.	.	.	.	.	no	no	no
7SK/ENSG00000271394	ENSG00000271394	7SK RNA [Source:RFAM;Acc:RF00100]	misc_RNA	17:35889558-35889804:1	0	1	0	3	4	18	10	4	2	0	42	0.07	0	0.013	0	0.091	0.147	0.268	0.087	0.05	0.014	0	0	4e-05	0	0.00135	0.00173	0.0012	0.00064	0.00118	0.00016	0	0	.	.	.	.	.	.	.	.	.	no	no	no
7SK/ENSG00000274303	ENSG00000274303	7SK RNA [Source:RFAM;Acc:RF00100]	misc_RNA	11:120365666-120365963:1	0	8	14	8	6	5	1	2	0	1	45	0.074	0	0.108	0.472	0.243	0.22	0.074	0.009	0.025	0	0.03	0	0.0029	0.00652	0.00274	0.00223	0.00029	4e-05	0.00011	0	0.00017	0	.	.	.	.	.	.	.	.	.	no	no	no
A1BG	ENSG00000121410	alpha-1-B glycoprotein [Source:HGNC Symbol;Acc:HGNC:5]	protein_coding	19:58345178-58353492:-1	2	430	136	150	95	174	356	304	72	2	1721	2.848	0.494	5.796	4.588	4.548	3.48	2.592	3.086	3.785	0.514	0.06	0.00733	0.12921	0.07125	0.06382	0.05495	0.02015	0.02841	0.04125	0.00712	0.0012	0	.	.	.	.	.	.	.	.	.	no	no	no
A1BG-AS1	ENSG00000268895	A1BG antisense RNA 1 [Source:HGNC Symbol;Acc:HGNC:37133]	lncRNA	19:58347718-58355455:1	0	1	2	1	1	0	0	1	1	0	7	0.012	0	0.013	0.067	0.03	0.037	0	0	0.012	0.007	0	0	0.00022	0.00078	0.00028	0.00066	0	0	3e-05	8e-05	0	0	.	.	.	.	.	.	.	.	.	no	no	no
A1CF	ENSG00000148584	APOBEC1 complementation factor [Source:HGNC Symbol;Acc:HGNC:24086]	protein_coding	10:50799409-50885675:-1	1	22	16	84	40	71	161	147	113	26	681	1.127	0.247	0.297	0.54	2.547	1.465	1.057	1.396	1.83	0.807	0.782	0.00771	0.00724	0.00892	0.03427	0.02791	0.00636	0.01356	0.01911	0.00697	0.01328	0	.	.	.	.	.	.	.	.	.	no	no	no
A2M	ENSG00000175899	alpha-2-macroglobulin [Source:HGNC Symbol;Acc:HGNC:7]	protein_coding	12:9067664-9116229:-1	72	1669	2409	542	132	122	355	1112	1657	160	8230	13.62	17.778	22.496	81.275	16.434	4.835	1.817	3.077	13.845	11.833	4.812	0.60116	0.9262	9.37708	0.33664	0.09453	0.02924	0.03115	0.15853	0.13987	0.08875	1	Cluster 7 (endothelia/macrophage)	0.813	0.101	0.712	0.712	3.09	0	0	endothelia/macrophage	no	no	yes
A2M-AS1	ENSG00000245105	A2M antisense RNA 1 [Source:HGNC Symbol;Acc:HGNC:27057]	lncRNA	12:9065163-9068689:1	2	150	51	9	11	9	4	29	11	3	279	0.462	0.494	2.022	1.721	0.273	0.403	0.134	0.035	0.361	0.079	0.09	0.01602	0.0372	0.02388	0.00348	0.00525	0.0008	0.00053	0.00344	0.00116	0.00137	0	.	.	.	.	.	.	.	.	.	no	no	no
A2ML1	ENSG00000166535	alpha-2-macroglobulin like 1 [Source:HGNC Symbol;Acc:HGNC:23336]	protein_coding	12:8822621-8887001:1	30	156	75	185	70	308	1472	358	255	16	2925	4.841	7.407	2.103	2.53	5.609	2.564	4.587	12.759	4.457	1.821	0.481	0.19569	0.04926	0.03803	0.08026	0.04291	0.03739	0.12617	0.05213	0.02178	0.00792	0	.	.	.	.	.	.	.	.	.	no	no	no
A2ML1-AS1	ENSG00000256661	A2ML1 antisense RNA 1 [Source:HGNC Symbol;Acc:HGNC:41022]	lncRNA	12:8776219-8830947:-1	0	0	0	1	1	8	115	30	25	2	182	0.301	0	0	0	0.03	0.037	0.119	0.997	0.374	0.179	0.06	0	0	0	0.00042	0.00011	0.00086	0.00615	0.00299	0.0012	0.00096	0	.	.	.	.	.	.	.	.	.	no	no	no
A2ML1-AS2	ENSG00000256904	A2ML1 antisense RNA 2 [Source:HGNC Symbol;Acc:HGNC:41523]	lncRNA	12:8819816-8820713:-1	0	20	9	15	5	29	22	5	5	1	111	0.184	0	0.27	0.304	0.455	0.183	0.432	0.191	0.062	0.036	0.03	0	0.00582	0.00533	0.00455	0.00252	0.00221	0.00179	0.00072	0.00132	0.00062	0	.	.	.	.	.	.	.	.	.	no	no	no
A2MP1	ENSG00000256069	alpha-2-macroglobulin pseudogene 1 [Source:HGNC Symbol;Acc:HGNC:8]	transcribed_unprocessed_pseudogene	12:9228533-9275817:-1	2	7	60	41	19	23	57	117	49	2	377	0.624	0.494	0.094	2.024	1.243	0.696	0.343	0.494	1.457	0.35	0.06	0.01431	0.00204	0.02421	0.01868	0.01441	0.0023	0.00359	0.01596	0.004	0.00089	0	.	.	.	.	.	.	.	.	.	no	no	no
A3GALT2	ENSG00000184389	alpha 1,3-galactosyltransferase 2 [Source:HGNC Symbol;Acc:HGNC:30005]	protein_coding	1:33306766-33321098:-1	0	1	2	6	8	13	28	67	73	7	205	0.339	0	0.013	0.067	0.182	0.293	0.194	0.243	0.834	0.521	0.211	0	0.00038	0.00042	0.00286	0.00522	0.00228	0.00178	0.00839	0.00455	0.00359	0	.	.	.	.	.	.	.	.	.	no	no	no
A4GALT	ENSG00000128274	alpha 1,4-galactosyltransferase (P blood group) [Source:HGNC Symbol;Acc:HGNC:18149]	protein_coding	22:42692121-42721298:-1	22	878	685	72	41	315	236	72	91	21	2433	4.026	5.432	11.834	23.111	2.183	1.502	4.692	2.046	0.896	0.65	0.632	0.12866	0.28789	0.40281	0.03126	0.02188	0.03552	0.01906	0.01018	0.00741	0.01139	0	.	.	.	.	.	.	.	.	.	no	no	no
A4GNT	ENSG00000118017	alpha-1,4-N-acetylglucosaminyltransferase [Source:HGNC Symbol;Acc:HGNC:17968]	protein_coding	3:138123713-138132390:-1	0	0	0	2	0	0	0	1	2	0	5	0.008	0	0	0	0.061	0	0	0	0.012	0.014	0	0	0	0	0.0006	0	0	0	0.00013	9e-05	0	0	.	.	.	.	.	.	.	.	.	no	no	no
AA06	ENSG00000265544	uncharacterized LOC100506677 [Source:NCBI gene (formerly Entrezgene);Acc:100506677]	lncRNA	17:33529787-33533760:-1	3	12	10	12	9	46	1646	787	978	88	3591	5.943	0.741	0.162	0.337	0.364	0.33	0.685	14.267	9.798	6.984	2.647	0.00833	0.00241	0.00444	0.00943	0.00667	0.01171	0.14545	0.08118	0.07191	0.04999	0	.	.	.	.	.	.	.	.	.	no	no	no
AAAS	ENSG00000094914	aladin WD repeat nucleoporin [Source:HGNC Symbol;Acc:HGNC:13666]	protein_coding	12:53307456-53324864:-1	25	668	326	1207	957	1973	1578	588	987	271	8580	14.199	6.173	9.004	10.999	36.598	35.055	29.386	13.678	7.321	7.048	8.15	0.1448	0.20081	0.16837	0.74297	0.73745	0.29635	0.12617	0.07107	0.07983	0.14943	2	Cluster 6 (undiff SPG) | Cluster 8 (diff SPG/early meiosis)	0.366 | 0.351	0.129 | 0.132	0.237 | 0.219	0.237	0.575 | 0.564	0.000e+00 | 1.874e-268	0.000e+00 | 9.479e-264	.	no	no	no
AACS	ENSG00000081760	acetoacetyl-CoA synthetase [Source:HGNC Symbol;Acc:HGNC:21298]	protein_coding	12:125065434-125143333:1	20	787	430	646	444	2448	3842	2998	1679	108	13402	22.179	4.938	10.608	14.507	19.588	16.264	36.461	33.302	37.326	11.99	3.248	0.11089	0.25003	0.23686	0.3115	0.29764	0.42669	0.40382	0.56671	0.14905	0.05596	1	Cluster 2 (early spermatid 2)	0.373	0.199	0.174	0.174	0.301	3.9e-244	1.97e-239	early spermatid	no	no	no
AACSP1	ENSG00000250420	acetoacetyl-CoA synthetase pseudogene 1 [Source:HGNC Symbol;Acc:HGNC:18226]	transcribed_unprocessed_pseudogene	5:178764861-178818435:-1	1	40	26	173	40	135	207	167	45	5	839	1.388	0.247	0.539	0.877	5.246	1.465	2.011	1.794	2.079	0.321	0.15	0.01082	0.0104	0.01136	0.0892	0.022	0.0198	0.01624	0.02814	0.00452	0.00322	0	.	.	.	.	.	.	.	.	.	no	no	no
AADAC	ENSG00000114771	arylacetamide deacetylase [Source:HGNC Symbol;Acc:HGNC:17]	protein_coding	3:151814073-151828488:1	2	2	0	21	9	41	37	6	6	0	124	0.205	0.494	0.027	0	0.637	0.33	0.611	0.321	0.075	0.043	0	0.01036	0.00152	0	0.01019	0.00458	0.00445	0.00266	0.00066	0.00034	0	0	.	.	.	.	.	.	.	.	.	no	no	no
AADACL2	ENSG00000197953	arylacetamide deacetylase like 2 [Source:HGNC Symbol;Acc:HGNC:24427]	protein_coding	3:151733916-151761339:1	0	6	12	42	20	139	94	21	20	1	355	0.587	0	0.081	0.405	1.273	0.733	2.07	0.815	0.261	0.143	0.03	0	0.00107	0.00622	0.01727	0.01014	0.01367	0.00615	0.00214	0.00133	0.00091	0	.	.	.	.	.	.	.	.	.	no	no	no
AADACL2-AS1	ENSG00000242908	AADACL2 antisense RNA 1 [Source:HGNC Symbol;Acc:HGNC:50301]	lncRNA	3:151751443-151928175:-1	2	16	11	101	80	1073	1020	366	311	14	2994	4.955	0.494	0.216	0.371	3.062	2.93	15.982	8.841	4.557	2.221	0.421	0.01563	0.00527	0.00629	0.04295	0.04999	0.14371	0.07663	0.04265	0.02343	0.00687	0	.	.	.	.	.	.	.	.	.	no	no	no
AADACL3	ENSG00000188984	arylacetamide deacetylase like 3 [Source:HGNC Symbol;Acc:HGNC:32037]	protein_coding	1:12716110-12728760:1	0	9	6	9	14	69	155	24	20	4	310	0.513	0	0.121	0.202	0.273	0.513	1.028	1.344	0.299	0.143	0.12	0	0.00186	0.00169	0.00325	0.00867	0.00745	0.01404	0.0027	0.00158	0.0013	0	.	.	.	.	.	.	.	.	.	no	no	no
AADACL4	ENSG00000204518	arylacetamide deacetylase like 4 [Source:HGNC Symbol;Acc:HGNC:32038]	protein_coding	1:12644085-12667076:1	0	0	1	4	6	101	105	25	18	1	261	0.432	0	0	0.034	0.121	0.22	1.504	0.91	0.311	0.129	0.03	0	0	0.00034	0.00122	0.0018	0.00859	0.00551	0.00274	0.00117	0.00026	0	.	.	.	.	.	.	.	.	.	no	no	no
AADACP1	ENSG00000240602	arylacetamide deacetylase pseudogene 1 [Source:HGNC Symbol;Acc:HGNC:50305]	transcribed_unprocessed_pseudogene	3:151770428-151784894:1	1	15	53	13	11	190	951	65	43	2	1344	2.224	0.247	0.202	1.788	0.394	0.403	2.83	8.243	0.809	0.307	0.06	0.00308	0.0048	0.02703	0.00489	0.00582	0.02237	0.06814	0.00718	0.00475	0.0009	0	.	.	.	.	.	.	.	.	.	no	no	no
AADAT	ENSG00000109576	aminoadipate aminotransferase [Source:HGNC Symbol;Acc:HGNC:17929]	protein_coding	4:170060222-170091699:-1	2	150	14	657	529	60	99	568	231	15	2325	3.848	0.494	2.022	0.472	19.921	19.377	0.894	0.858	7.072	1.65	0.451	0.01307	0.04462	0.00752	0.36735	0.4273	0.00945	0.00951	0.08138	0.02211	0.00741	0	.	.	.	.	.	.	.	.	.	no	no	no
AAGAB	ENSG00000103591	alpha and gamma adaptin binding protein [Source:HGNC Symbol;Acc:HGNC:25662]	protein_coding	15:67200667-67255195:-1	20	484	339	739	1083	2051	2034	546	272	44	7612	12.597	4.938	6.524	11.437	22.408	39.67	30.548	17.63	6.798	1.942	1.323	0.11968	0.14432	0.1618	0.40363	0.87243	0.29091	0.17733	0.06999	0.02772	0.02635	1	Cluster 8 (diff SPG/early meiosis)	0.397	0.113	0.284	0.284	0.718	0	0	diff SPG/early meiosis	no	no	no
AAK1	ENSG00000115977	AP2 associated kinase 1 [Source:HGNC Symbol;Acc:HGNC:19679]	protein_coding	2:69457997-69674349:-1	22	1717	1275	1227	927	1714	2484	2095	1800	202	13463	22.28	5.432	23.143	43.016	37.204	33.956	25.529	21.531	26.083	12.854	6.075	0.13913	0.60497	1.01761	0.77247	0.7603	0.25817	0.23069	0.411	0.16558	0.10846	3	Cluster 7 (endothelia/macrophage) | Cluster 6 (undiff SPG) | Cluster 8 (diff SPG/early meiosis)	0.43 | 0.372 | 0.34	0.212 | 0.214 | 0.217	0.218 | 0.158 | 0.123	0.218	0.590 | 0.392 | 0.378	4.716e-236 | 1.291e-130 | 6.127e-95	2.386e-231 | 6.529e-126 | 3.099e-90	.	no	no	yes
AAMDC	ENSG00000087884	adipogenesis associated Mth938 domain containing [Source:HGNC Symbol;Acc:HGNC:30205]	protein_coding	11:77821109-77918432:1	73	2181	925	819	1656	2763	7307	2641	1594	232	20191	33.414	18.025	29.397	31.208	24.833	60.659	41.153	63.335	32.881	11.383	6.977	0.55774	0.76859	0.59731	0.45715	2.15507	0.60026	1.32967	0.45938	0.15368	0.13	2	Cluster 8 (diff SPG/early meiosis) | Cluster 1 (early spermatid 1)	0.607 | 0.633	0.321 | 0.264	0.286 | 0.369	0.369	0.976 | 0.617	0.000e+00 | 0.000e+00	0.000e+00 | 0.000e+00	.	no	no	no
AAMP	ENSG00000127837	angio associated migratory cell protein [Source:HGNC Symbol;Acc:HGNC:18]	protein_coding	2:218264129-218270178:-1	135	2468	1128	1046	1230	1965	514	224	321	41	9072	15.013	33.333	33.266	38.057	31.716	45.055	29.267	4.455	2.789	2.292	1.233	1.16962	0.88213	0.75808	0.59536	1.13813	0.40649	0.04539	0.03222	0.0391	0.02947	5	Cluster 9 (Sertoli) | Cluster 3 (myoid/Leydig) | Cluster 7 (endothelia/macrophage) | Cluster 6 (undiff SPG) | Cluster 8 (diff SPG/early meiosis)	0.333 | 0.333 | 0.381 | 0.317 | 0.451	0.149 | 0.125 | 0.138 | 0.14 | 0.136	0.184 | 0.208 | 0.243 | 0.177 | 0.315	0.315	0.739 | 0.619 | 0.455 | 0.307 | 0.755	6.185e-42 | 0.000e+00 | 2.247e-218 | 4.273e-136 | 0.000e+00	3.128e-37 | 0.000e+00 | 1.136e-213 | 2.161e-131 | 0.000e+00	.	yes	yes	yes
AANAT	ENSG00000129673	aralkylamine N-acetyltransferase [Source:HGNC Symbol;Acc:HGNC:19]	protein_coding	17:76453351-76470117:1	3	71	55	148	86	664	1376	394	578	193	3568	5.905	0.741	0.957	1.856	4.488	3.15	9.89	11.927	4.905	4.128	5.805	0.01201	0.02002	0.01927	0.05614	0.04403	0.08458	0.11035	0.03818	0.04386	0.10698	0	.	.	.	.	.	.	.	.	.	no	no	no
AAR2	ENSG00000131043	AAR2 splicing factor [Source:HGNC Symbol;Acc:HGNC:15886]	protein_coding	20:36236131-36270918:1	17	626	374	577	544	1494	778	339	213	30	4992	8.261	4.198	8.438	12.618	17.495	19.927	22.252	6.744	4.221	1.521	0.902	0.11924	0.18421	0.1846	0.25902	0.35037	0.21948	0.06117	0.05072	0.0201	0.01453	0	.	.	.	.	.	.	.	.	.	no	no	no
AARD	ENSG00000205002	alanine and arginine rich domain containing protein [Source:HGNC Symbol;Acc:HGNC:33842]	protein_coding	8:116938207-116944487:1	283	166	53	476	284	4189	1617	400	642	102	8212	13.59	69.877	2.237	1.788	14.433	10.403	62.392	14.016	4.98	4.585	3.068	5.5611	0.05469	0.02783	0.23182	0.18719	1.85065	0.17274	0.07349	0.10855	0.08122	2	Cluster 9 (Sertoli) | Cluster 4 (spermatocyte)	0.699 | 0.624	0.132 | 0.075	0.567 | 0.549	0.567	2.325 | 1.302	0.000e+00 | 0.000e+00	0.000e+00 | 0.000e+00	.	yes	no	no
AARS1	ENSG00000090861	alanyl-tRNA synthetase 1 [Source:HGNC Symbol;Acc:HGNC:20]	protein_coding	16:70251983-70289707:-1	31	1344	643	772	772	1460	2175	832	597	76	8702	14.401	7.654	18.116	21.694	23.408	28.278	21.746	18.852	10.359	4.263	2.286	0.1861	0.44641	0.36624	0.40171	0.57848	0.20106	0.17855	0.1161	0.0508	0.03903	1	Cluster 8 (diff SPG/early meiosis)	0.283	0.137	0.146	0.146	0.407	1.29e-136	6.53e-132	diff SPG/early meiosis	no	no	no
AARS1P1	ENSG00000249038	alanyl-tRNA synthetase 1 pseudogene 1 [Source:HGNC Symbol;Acc:HGNC:49894]	processed_pseudogene	4:132592084-132592536:1	0	2	0	1	0	0	21	37	28	2	91	0.151	0	0.027	0	0.03	0	0	0.182	0.461	0.2	0.06	0	0.00035	0	0.00015	0	0	0.00183	0.0043	0.00177	0.00112	0	.	.	.	.	.	.	.	.	.	no	no	no
AARS2	ENSG00000124608	alanyl-tRNA synthetase 2, mitochondrial [Source:HGNC Symbol;Acc:HGNC:21022]	protein_coding	6:44298731-44313347:-1	7	235	146	93	139	253	2237	364	257	17	3748	6.203	1.728	3.168	4.926	2.82	5.092	3.768	19.39	4.532	1.835	0.511	0.03668	0.07003	0.06603	0.03867	0.08007	0.03137	0.19371	0.04616	0.02025	0.00811	0	.	.	.	.	.	.	.	.	.	no	no	no
AARSD1	ENSG00000266967	alanyl-tRNA synthetase domain containing 1 [Source:HGNC Symbol;Acc:HGNC:28417]	protein_coding	17:42950526-42964498:-1	7	380	133	299	469	944	1594	855	261	8	4950	8.192	1.728	5.122	4.487	9.066	17.179	14.06	13.816	10.645	1.864	0.241	0.04944	0.11843	0.07345	0.13828	0.32294	0.13522	0.14485	0.12857	0.02288	0.002	0	.	.	.	.	.	.	.	.	.	no	no	no
AARSD1P1	ENSG00000234969	AARSD1 pseudogene 1 [Source:HGNC Symbol;Acc:HGNC:54994]	processed_pseudogene	X:74069276-74070832:1	0	1	0	1	0	1	1	1	0	0	5	0.008	0	0.013	0	0.03	0	0.015	0.009	0.012	0	0	0	0.00012	0	0.0005	0	7e-05	3e-05	4e-05	0	0	0	.	.	.	.	.	.	.	.	.	no	no	no
AASDH	ENSG00000157426	aminoadipate-semialdehyde dehydrogenase [Source:HGNC Symbol;Acc:HGNC:23993]	protein_coding	4:56338287-56387508:-1	25	793	352	790	812	827	3672	573	217	24	8085	13.38	6.173	10.689	11.876	23.954	29.744	12.318	31.828	7.134	1.55	0.722	0.14449	0.24741	0.18217	0.44161	0.64745	0.11094	0.36937	0.07716	0.02525	0.01828	1	Cluster 8 (diff SPG/early meiosis)	0.297	0.126	0.171	0.171	0.491	1.19e-197	6.01e-193	diff SPG/early meiosis	no	no	no
AASDHPPT	ENSG00000149313	aminoadipate-semialdehyde dehydrogenase-phosphopantetheinyl transferase [Source:HGNC Symbol;Acc:HGNC:14235]	protein_coding	11:106075501-106098699:1	111	1235	558	1229	1137	2757	8095	5362	3236	179	23899	39.55	27.407	16.646	18.826	37.265	41.648	41.063	70.166	66.758	23.109	5.383	0.95637	0.39324	0.28726	0.79362	0.9589	0.55769	1.81149	1.96485	0.3993	0.10665	1	Cluster 1 (early spermatid 1) | Cluster 2 (early spermatid 2)	0.702 | 0.668	0.323 | 0.354	0.379 | 0.314	0.379	0.715 | 0.750	0.000e+00 | 0.000e+00	0.000e+00 | 0.000e+00	early spermatid	no	no	no
AASS	ENSG00000008311	aminoadipate-semialdehyde synthase [Source:HGNC Symbol;Acc:HGNC:17366]	protein_coding	7:122064583-122144308:-1	13	1532	635	244	365	456	1742	611	350	32	5980	9.896	3.21	20.65	21.424	7.398	13.37	6.792	15.099	7.607	2.499	0.962	0.06065	0.70184	0.43717	0.11742	0.28053	0.06221	0.15335	0.09474	0.03038	0.01833	0	.	.	.	.	.	.	.	.	.	no	no	no
AATBC	ENSG00000215458	apoptosis associated transcript in bladder cancer [Source:HGNC Symbol;Acc:HGNC:51526]	lncRNA	21:43805758-43812567:-1	6	18	23	19	24	58	121	1256	2589	641	4755	7.869	1.481	0.243	0.776	0.576	0.879	0.864	1.049	15.637	18.489	19.278	0.04445	0.00522	0.01036	0.01139	0.01844	0.00953	0.01014	0.18761	0.24548	0.40293	0	.	.	.	.	.	.	.	.	.	no	no	no
AATF	ENSG00000275700	apoptosis antagonizing transcription factor [Source:HGNC Symbol;Acc:HGNC:19235]	protein_coding	17:36948925-37056871:1	37	1066	628	1966	955	3307	3952	1238	1460	329	14938	24.721	9.136	14.369	21.188	59.612	34.982	49.255	34.255	15.413	10.426	9.895	0.20666	0.31374	0.3388	1.64747	0.74691	0.68039	0.41717	0.15729	0.1382	0.17426	3	Cluster 6 (undiff SPG) | Cluster 8 (diff SPG/early meiosis) | Cluster 4 (spermatocyte)	0.596 | 0.35 | 0.493	0.227 | 0.242 | 0.217	0.369 | 0.108 | 0.276	0.369	0.998 | 0.339 | 0.302	0.000e+00 | 4.579e-81 | 0.000e+00	0.000e+00 | 2.316e-76 | 0.000e+00	.	no	no	no
AATK	ENSG00000181409	apoptosis associated tyrosine kinase [Source:HGNC Symbol;Acc:HGNC:21]	protein_coding	17:81110487-81166221:-1	4	306	308	352	100	125	538	142	59	8	1942	3.214	0.988	4.125	10.391	10.673	3.663	1.862	4.663	1.768	0.421	0.241	0.02864	0.09619	0.19712	0.16583	0.05206	0.01348	0.04425	0.02526	0.00727	0.00428	0	.	.	.	.	.	.	.	.	.	no	no	no
ABALON	ENSG00000281376	apoptotic BCL2L1-antisense long non-coding RNA [Source:HGNC Symbol;Acc:HGNC:49667]	lncRNA	20:31721507-31723409:1	0	1	2	1	4	6	17	5	9	0	45	0.074	0	0.013	0.067	0.03	0.147	0.089	0.147	0.062	0.064	0	0	0.0002	0.00029	0.00013	0.00077	0.00071	0.00112	0.0002	0.00058	0	0	.	.	.	.	.	.	.	.	.	no	no	no
ABAT	ENSG00000183044	4-aminobutyrate aminotransferase [Source:HGNC Symbol;Acc:HGNC:23]	protein_coding	16:8674596-8784575:1	53	263	101	204	126	1189	3271	1072	1600	277	8156	13.497	13.086	3.545	3.408	6.186	4.615	17.709	28.352	13.347	11.426	8.331	0.41298	0.07625	0.05032	0.08963	0.07703	0.1513	0.30466	0.12565	0.12485	0.14676	0	.	.	.	.	.	.	.	.	.	no	no	no
ABCA1	ENSG00000165029	ATP binding cassette subfamily A member 1 [Source:HGNC Symbol;Acc:HGNC:29]	protein_coding	9:104781006-104928155:-1	27	571	97	248	40	93	232	66	98	20	1492	2.469	6.667	7.696	3.273	7.52	1.465	1.385	2.011	0.822	0.7	0.602	0.17439	0.2007	0.06026	0.14492	0.03053	0.00958	0.0164	0.01315	0.01304	0.01093	0	.	.	.	.	.	.	.	.	.	no	no	no
ABCA10	ENSG00000154263	ATP binding cassette subfamily A member 10 [Source:HGNC Symbol;Acc:HGNC:30]	protein_coding	17:69147214-69244846:-1	30	809	55	135	193	890	6388	3719	3569	146	15934	26.369	7.407	10.904	1.856	4.093	7.07	13.256	55.37	46.302	25.487	4.391	0.23684	0.30822	0.02473	0.07208	0.13029	0.14186	1.10028	0.78548	0.40653	0.08963	1	Cluster 1 (early spermatid 1) | Cluster 2 (early spermatid 2)	0.554 | 0.463	0.195 | 0.233	0.359 | 0.230	0.359	0.655 | 0.317	0.000e+00 | 0.000e+00	0.000e+00 | 0.000e+00	early spermatid	no	no	no
ABCA11P	ENSG00000251595	ATP binding cassette subfamily A member 11, pseudogene [Source:HGNC Symbol;Acc:HGNC:31]	transcribed_processed_pseudogene	4:425435-474129:-1	8	79	59	26	85	154	121	236	53	6	827	1.369	1.975	1.065	1.991	0.788	3.114	2.294	1.049	2.938	0.378	0.18	0.04809	0.02077	0.02419	0.01193	0.05097	0.02196	0.00782	0.03225	0.00435	0.00223	0	.	.	.	.	.	.	.	.	.	no	no	no
ABCA12	ENSG00000144452	ATP binding cassette subfamily A member 12 [Source:HGNC Symbol;Acc:HGNC:14637]	protein_coding	2:214931542-215138626:-1	0	15	3	81	33	299	618	215	117	20	1401	2.319	0	0.202	0.101	2.456	1.209	4.453	5.357	2.677	0.836	0.602	0	0.00389	0.00143	0.03827	0.01918	0.02959	0.04206	0.02545	0.01086	0.01104	0	.	.	.	.	.	.	.	.	.	no	no	no
ABCA13	ENSG00000179869	ATP binding cassette subfamily A member 13 [Source:HGNC Symbol;Acc:HGNC:14638]	protein_coding	7:48171458-48647497:1	5	42	26	113	123	63	1094	566	526	53	2611	4.321	1.235	0.566	0.877	3.426	4.505	0.938	9.483	7.047	3.756	1.594	0.02704	0.01215	0.0167	0.04794	0.07691	0.00817	0.08165	0.06969	0.03815	0.02625	0	.	.	.	.	.	.	.	.	.	no	no	no
ABCA17P	ENSG00000238098	ATP binding cassette subfamily A member 17, pseudogene [Source:HGNC Symbol;Acc:HGNC:32972]	transcribed_unitary_pseudogene	16:2339150-2426699:1	57	329	117	840	1587	5232	8477	5002	9033	1044	31718	52.49	14.074	4.435	3.947	25.47	58.132	77.927	73.477	62.276	64.508	31.398	0.41759	0.10295	0.07449	0.48472	2.79779	2.48913	2.03852	1.4896	1.78322	0.88548	3	Cluster 8 (diff SPG/early meiosis) | Cluster 4 (spermatocyte) | Cluster 1 (early spermatid 1)	0.581 | 0.779 | 0.735	0.522 | 0.493 | 0.475	0.059 | 0.286 | 0.260	0.286	0.641 | 0.556 | 0.358	7.254e-259 | 0.000e+00 | 0.000e+00	3.669e-254 | 0.000e+00 | 0.000e+00	.	no	no	no
ABCA2	ENSG00000107331	ATP binding cassette subfamily A member 2 [Source:HGNC Symbol;Acc:HGNC:32]	protein_coding	9:137007234-137028922:-1	11	618	159	233	89	95	87	60	54	9	1415	2.342	2.716	8.33	5.364	7.065	3.26	1.415	0.754	0.747	0.386	0.271	0.04914	0.19286	0.06335	0.09081	0.04831	0.01151	0.00633	0.01013	0.00396	0.00536	0	.	.	.	.	.	.	.	.	.	no	no	no
ABCA3	ENSG00000167972	ATP binding cassette subfamily A member 3 [Source:HGNC Symbol;Acc:HGNC:33]	protein_coding	16:2275881-2340746:-1	12	129	106	619	195	61	209	631	408	31	2401	3.973	2.963	1.739	3.576	18.769	7.143	0.909	1.812	7.856	2.914	0.932	0.0715	0.03353	0.04244	0.295	0.12049	0.00949	0.01724	0.09188	0.03696	0.01268	0	.	.	.	.	.	.	.	.	.	no	no	no
ABCA4	ENSG00000198691	ATP binding cassette subfamily A member 4 [Source:HGNC Symbol;Acc:HGNC:34]	protein_coding	1:93992834-94121148:-1	1	13	14	58	15	48	342	550	635	137	1813	3	0.247	0.175	0.472	1.759	0.549	0.715	2.964	6.848	4.535	4.12	0.00259	0.00362	0.0083	0.0197	0.00445	0.01	0.0249	0.06604	0.0482	0.07752	0	.	.	.	.	.	.	.	.	.	no	no	no
ABCA5	ENSG00000154265	ATP binding cassette subfamily A member 5 [Source:HGNC Symbol;Acc:HGNC:35]	protein_coding	17:69244311-69327244:-1	11	1658	468	1256	1446	2385	2097	1254	691	91	11357	18.795	2.716	22.348	15.789	38.084	52.967	35.523	18.176	15.613	4.935	2.737	0.076	0.59642	0.25603	0.82688	2.13533	0.47319	0.19199	0.19726	0.07093	0.05674	2	Cluster 6 (undiff SPG) | Cluster 8 (diff SPG/early meiosis)	0.381 | 0.53	0.177 | 0.172	0.204 | 0.358	0.358	0.451 | 1.294	6.297e-178 | 0.000e+00	3.185e-173 | 0.000e+00	.	no	no	no
ABCA6	ENSG00000154262	ATP binding cassette subfamily A member 6 [Source:HGNC Symbol;Acc:HGNC:36]	protein_coding	17:69078702-69141895:-1	0	672	77	183	85	439	1190	418	196	27	3287	5.44	0	9.058	2.598	5.549	3.114	6.539	10.315	5.204	1.4	0.812	0	0.25332	0.04318	0.07742	0.05992	0.06493	0.10889	0.07778	0.02035	0.01734	0	.	.	.	.	.	.	.	.	.	no	no	no
ABCA7	ENSG00000064687	ATP binding cassette subfamily A member 7 [Source:HGNC Symbol;Acc:HGNC:37]	protein_coding	19:1039997-1065572:1	5	44	76	157	84	62	198	745	521	23	1915	3.169	1.235	0.593	2.564	4.76	3.077	0.923	1.716	9.275	3.721	0.692	0.02866	0.0127	0.03647	0.08291	0.04889	0.01175	0.01628	0.1149	0.03763	0.01036	0	.	.	.	.	.	.	.	.	.	no	no	no
ABCA8	ENSG00000141338	ATP binding cassette subfamily A member 8 [Source:HGNC Symbol;Acc:HGNC:38]	protein_coding	17:68867289-68955392:-1	38	2394	122	150	88	103	213	226	183	27	3544	5.865	9.383	32.268	4.116	4.548	3.223	1.534	1.846	2.814	1.307	0.812	0.27009	1.3793	0.08251	0.06455	0.06877	0.02199	0.01905	0.03894	0.01943	0.02159	1	Cluster 3 (myoid/Leydig)	0.323	0.022	0.301	0.301	1.203	0	0	myoid/Leydig	no	yes	no
ABCA9	ENSG00000154258	ATP binding cassette subfamily A member 9 [Source:HGNC Symbol;Acc:HGNC:39]	protein_coding	17:68974488-69060949:-1	0	1273	77	235	108	301	890	310	163	14	3371	5.579	0	17.159	2.598	7.126	3.956	4.483	7.714	3.86	1.164	0.421	0	0.53391	0.04138	0.10422	0.06905	0.03693	0.0709	0.04398	0.01692	0.00793	0	.	.	.	.	.	.	.	.	.	no	no	no
ABCA9-AS1	ENSG00000231749	ABCA9 antisense RNA 1 [Source:HGNC Symbol;Acc:HGNC:39983]	lncRNA	17:68944531-69042784:1	0	50	15	54	12	39	58	23	21	3	275	0.455	0	0.674	0.506	1.637	0.44	0.581	0.503	0.286	0.15	0.09	0	0.01762	0.00684	0.0215	0.00634	0.00489	0.00387	0.00285	0.00164	0.0015	0	.	.	.	.	.	.	.	.	.	no	no	no
ABCB1	ENSG00000085563	ATP binding cassette subfamily B member 1 [Source:HGNC Symbol;Acc:HGNC:40]	protein_coding	7:87503017-87713323:-1	7	74	1056	129	37	127	929	2452	608	21	5440	9.003	1.728	0.997	35.628	3.911	1.355	1.892	8.052	30.528	4.342	0.632	0.04051	0.02294	0.89014	0.06792	0.02174	0.02786	0.08808	0.49679	0.05485	0.01016	2	Cluster 7 (endothelia/macrophage) | Cluster 2 (early spermatid 2)	0.356 | 0.305	0.076 | 0.057	0.280 | 0.248	0.28	0.765 | 0.448	0.000e+00 | 0.000e+00	0.000e+00 | 0.000e+00	.	no	no	yes
ABCB10	ENSG00000135776	ATP binding cassette subfamily B member 10 [Source:HGNC Symbol;Acc:HGNC:41]	protein_coding	1:229516582-229558707:-1	4	126	144	217	106	40	33	22	36	5	733	1.213	0.988	1.698	4.858	6.58	3.883	0.596	0.286	0.274	0.257	0.15	0.0189	0.03578	0.05245	0.09966	0.06455	0.00691	0.00241	0.00162	0.0051	0.00198	0	.	.	.	.	.	.	.	.	.	no	no	no
ABCB10P1	ENSG00000274099	ABCB10 pseudogene 1 [Source:HGNC Symbol;Acc:HGNC:14114]	processed_pseudogene	15:23179869-23182049:1	0	1	0	34	5	0	0	1	3	0	44	0.073	0	0.013	0	1.031	0.183	0	0	0.012	0.021	0	0	0.0001	0	0.01371	0.00166	0	0	0.0002	0.00024	0	0	.	.	.	.	.	.	.	.	.	no	no	no
ABCB10P3	ENSG00000261524	ABCB10 pseudogene 3 [Source:HGNC Symbol;Acc:HGNC:31129]	processed_pseudogene	15:28402868-28405033:1	0	0	0	1	0	1	0	0	0	0	2	0.003	0	0	0	0.03	0	0.015	0	0	0	0	0	0	0	0.0003	0	5e-05	0	0	0	0	0	.	.	.	.	.	.	.	.	.	no	no	no
ABCB10P4	ENSG00000260053	ABCB10 pseudogene 4 [Source:HGNC Symbol;Acc:HGNC:31130]	processed_pseudogene	15:28506625-28508808:-1	0	2	3	52	6	2	1	4	6	1	77	0.127	0	0.027	0.101	1.577	0.22	0.03	0.009	0.05	0.043	0.03	0	0.00047	0.00168	0.02473	0.0023	9e-05	7e-05	0.00024	0.0007	0.00019	0	.	.	.	.	.	.	.	.	.	no	no	no
ABCB11	ENSG00000073734	ATP binding cassette subfamily B member 11 [Source:HGNC Symbol;Acc:HGNC:42]	protein_coding	2:168915498-169031324:-1	9	71	62	104	37	169	3387	1036	748	99	5722	9.469	2.222	0.957	2.092	3.153	1.355	2.517	29.358	12.898	5.342	2.977	0.05441	0.01874	0.03425	0.04807	0.02211	0.02118	0.38164	0.15412	0.0662	0.05335	1	Cluster 1 (early spermatid 1)	0.294	0.048	0.246	0.246	0.381	0	0	early spermatid	no	no	no
ABCB4	ENSG00000005471	ATP binding cassette subfamily B member 4 [Source:HGNC Symbol;Acc:HGNC:45]	protein_coding	7:87401696-87480435:-1	2	7	33	53	55	248	344	316	341	68	1467	2.428	0.494	0.094	1.113	1.607	2.015	3.694	2.982	3.934	2.435	2.045	0.00514	0.00122	0.02119	0.02125	0.02596	0.02698	0.02163	0.03592	0.02441	0.04071	0	.	.	.	.	.	.	.	.	.	no	no	no
ABCB5	ENSG00000004846	ATP binding cassette subfamily B member 5 [Source:HGNC Symbol;Acc:HGNC:46]	protein_coding	7:20615667-20777038:1	0	50	20	81	20	126	1335	364	74	5	2075	3.434	0	0.674	0.675	2.456	0.733	1.877	11.571	4.532	0.528	0.15	0	0.01606	0.01102	0.03164	0.01527	0.01329	0.09553	0.04062	0.00663	0.00217	0	.	.	.	.	.	.	.	.	.	no	no	no
ABCB6	ENSG00000115657	ATP binding cassette subfamily B member 6 (Langereis blood group) [Source:HGNC Symbol;Acc:HGNC:47]	protein_coding	2:219209772-219218994:-1	0	40	16	22	24	74	103	40	33	3	355	0.587	0	0.539	0.54	0.667	0.879	1.102	0.893	0.498	0.236	0.09	0	0.01219	0.00916	0.00917	0.01706	0.01268	0.0098	0.00503	0.00307	0.00363	0	.	.	.	.	.	.	.	.	.	no	no	no
ABCB7	ENSG00000131269	ATP binding cassette subfamily B member 7 [Source:HGNC Symbol;Acc:HGNC:48]	protein_coding	X:75051048-75156732:-1	18	638	391	540	273	122	219	152	80	5	2438	4.035	4.444	8.6	13.192	16.374	10	1.817	1.898	1.892	0.571	0.15	0.10326	0.19614	0.20537	0.26227	0.15849	0.01709	0.01785	0.02612	0.00665	0.00416	0	.	.	.	.	.	.	.	.	.	no	no	no
ABCB8	ENSG00000197150	ATP binding cassette subfamily B member 8 [Source:HGNC Symbol;Acc:HGNC:49]	protein_coding	7:151028422-151047782:1	16	346	136	188	275	481	617	231	228	53	2571	4.255	3.951	4.664	4.588	5.7	10.073	7.164	5.348	2.876	1.628	1.594	0.09511	0.09513	0.06503	0.08747	0.15725	0.0607	0.04723	0.03073	0.0184	0.02517	0	.	.	.	.	.	.	.	.	.	no	no	no
ABCB9	ENSG00000150967	ATP binding cassette subfamily B member 9 [Source:HGNC Symbol;Acc:HGNC:50]	protein_coding	12:122920951-122981649:-1	21	366	346	306	196	1281	1385	605	672	189	5367	8.882	5.185	4.933	11.673	9.278	7.179	19.08	12.005	7.532	4.799	5.684	0.14702	0.11475	0.19701	0.13545	0.11873	0.17275	0.10443	0.08351	0.05524	0.10819	0	.	.	.	.	.	.	.	.	.	no	no	no
ABCC1	ENSG00000103222	ATP binding cassette subfamily C member 1 [Source:HGNC Symbol;Acc:HGNC:51]	protein_coding	16:15949138-16143257:1	39	369	238	360	104	941	1893	597	591	124	5256	8.698	9.63	4.974	8.03	10.916	3.81	14.015	16.408	7.433	4.221	3.729	0.28604	0.11463	0.11111	0.18399	0.05554	0.10611	0.14374	0.07567	0.05127	0.06442	0	.	.	.	.	.	.	.	.	.	no	no	no
ABCC10	ENSG00000124574	ATP binding cassette subfamily C member 10 [Source:HGNC Symbol;Acc:HGNC:52]	protein_coding	6:43427366-43450427:1	5	231	133	125	91	45	265	100	80	7	1082	1.791	1.235	3.114	4.487	3.79	3.333	0.67	2.297	1.245	0.571	0.211	0.01591	0.06732	0.06019	0.05565	0.05778	0.00531	0.02551	0.01667	0.00703	0.00291	0	.	.	.	.	.	.	.	.	.	no	no	no
ABCC11	ENSG00000121270	ATP binding cassette subfamily C member 11 [Source:HGNC Symbol;Acc:HGNC:14639]	protein_coding	16:48165773-48247568:-1	0	36	26	118	71	659	654	263	129	14	1970	3.26	0	0.485	0.877	3.578	2.601	9.815	5.669	3.274	0.921	0.421	0	0.00925	0.0165	0.04511	0.04364	0.07677	0.04764	0.03608	0.01112	0.00587	0	.	.	.	.	.	.	.	.	.	no	no	no
ABCC12	ENSG00000140798	ATP binding cassette subfamily C member 12 [Source:HGNC Symbol;Acc:HGNC:14640]	protein_coding	16:48081006-48156018:-1	4	9	5	163	33	1172	681	329	304	82	2782	4.604	0.988	0.121	0.169	4.942	1.209	17.456	5.903	4.096	2.171	2.466	0.02587	0.00247	0.00172	0.06227	0.01662	0.14944	0.05128	0.04288	0.02307	0.03933	0	.	.	.	.	.	.	.	.	.	no	no	no
ABCC13	ENSG00000243064	ATP binding cassette subfamily C member 13 (pseudogene) [Source:HGNC Symbol;Acc:HGNC:16022]	transcribed_unprocessed_pseudogene	21:14236206-14362754:1	1	37	16	104	42	115	271	167	66	7	826	1.367	0.247	0.499	0.54	3.153	1.538	1.713	2.349	2.079	0.471	0.211	0.01009	0.01173	0.00708	0.03936	0.02442	0.01288	0.02042	0.02114	0.0068	0.00341	0	.	.	.	.	.	.	.	.	.	no	no	no
ABCC2	ENSG00000023839	ATP binding cassette subfamily C member 2 [Source:HGNC Symbol;Acc:HGNC:53]	protein_coding	10:99782640-99852594:1	0	37	18	103	71	149	747	169	85	6	1385	2.292	0	0.499	0.607	3.123	2.601	2.219	6.475	2.104	0.607	0.18	0	0.01082	0.0075	0.04195	0.04121	0.01939	0.05209	0.02044	0.00846	0.00315	0	.	.	.	.	.	.	.	.	.	no	no	no
ABCC3	ENSG00000108846	ATP binding cassette subfamily C member 3 [Source:HGNC Symbol;Acc:HGNC:54]	protein_coding	17:50634777-50692253:1	14	216	92	170	74	246	550	2206	3079	128	6775	11.212	3.457	2.911	3.104	5.155	2.711	3.664	4.767	27.465	21.988	3.85	0.08067	0.06348	0.05232	0.07273	0.04132	0.04115	0.04879	0.34297	0.29052	0.06544	1	Cluster 2 (early spermatid 2)	0.275	0.087	0.188	0.188	0.266	0	0	early spermatid	no	no	no
ABCC4	ENSG00000125257	ATP binding cassette subfamily C member 4 [Source:HGNC Symbol;Acc:HGNC:55]	protein_coding	13:95019835-95301475:-1	6	155	924	593	194	75	387	181	133	13	2661	4.404	1.481	2.089	31.174	17.981	7.106	1.117	3.354	2.253	0.95	0.391	0.03056	0.04587	0.69459	0.32159	0.11571	0.01078	0.02853	0.0301	0.01268	0.00727	1	Cluster 7 (endothelia/macrophage)	0.312	0.03	0.282	0.282	0.698	0	0	endothelia/macrophage	no	no	yes
ABCC5	ENSG00000114770	ATP binding cassette subfamily C member 5 [Source:HGNC Symbol;Acc:HGNC:56]	protein_coding	3:183919934-184017939:-1	24	275	171	371	347	92	548	396	224	25	2473	4.093	5.926	3.707	5.769	11.249	12.711	1.37	4.75	4.93	1.6	0.752	0.12041	0.08348	0.08454	0.18008	0.22798	0.0141	0.04691	0.06386	0.01909	0.01579	0	.	.	.	.	.	.	.	.	.	no	no	no
ABCC5-AS1	ENSG00000223882	ABCC5 antisense RNA 1 [Source:HGNC Symbol;Acc:HGNC:40055]	lncRNA	3:184006338-184011419:1	0	1	0	2	1	0	11	1	2	0	18	0.03	0	0.013	0	0.061	0.037	0	0.095	0.012	0.014	0	0	0.00021	0	0.00069	0.00046	0	0.0011	4e-05	5e-05	0	0	.	.	.	.	.	.	.	.	.	no	no	no
ABCC6	ENSG00000091262	ATP binding cassette subfamily C member 6 [Source:HGNC Symbol;Acc:HGNC:57]	protein_coding	16:16149565-16223522:-1	1	86	15	26	13	181	428	51	43	6	850	1.407	0.247	1.159	0.506	0.788	0.476	2.696	3.71	0.635	0.307	0.18	0.00204	0.02634	0.00731	0.0105	0.00611	0.01561	0.02888	0.00778	0.00341	0.00409	0	.	.	.	.	.	.	.	.	.	no	no	no
ABCC6P1	ENSG00000256340	ATP binding cassette subfamily C member 6 pseudogene 1 [Source:HGNC Symbol;Acc:HGNC:33352]	transcribed_unprocessed_pseudogene	16:18571162-18598328:1	0	27	0	13	3	1	9	18	18	1	90	0.149	0	0.364	0	0.394	0.11	0.015	0.078	0.224	0.129	0.03	0	0.00832	0	0.00444	0.00092	0.0001	0.00064	0.00132	0.00075	0.00027	0	.	.	.	.	.	.	.	.	.	no	no	no
ABCC6P2	ENSG00000255277	ATP binding cassette subfamily C member 6 pseudogene 2 [Source:HGNC Symbol;Acc:HGNC:33353]	transcribed_unprocessed_pseudogene	16:14820792-14824702:-1	0	35	0	2	1	0	1	1	1	0	41	0.068	0	0.472	0	0.061	0.037	0	0.009	0.012	0.007	0	0	0.00969	0	0.00073	0.00053	0	3e-05	0.00052	6e-05	0	0	.	.	.	.	.	.	.	.	.	no	no	no
ABCC8	ENSG00000006071	ATP binding cassette subfamily C member 8 [Source:HGNC Symbol;Acc:HGNC:59]	protein_coding	11:17392498-17476894:-1	1	150	72	191	52	131	326	379	245	9	1556	2.575	0.247	2.022	2.429	5.791	1.905	1.951	2.826	4.719	1.75	0.271	0.00816	0.0453	0.0304	0.07588	0.02926	0.01534	0.02302	0.06249	0.01933	0.00584	0	.	.	.	.	.	.	.	.	.	no	no	no
ABCC9	ENSG00000069431	ATP binding cassette subfamily C member 9 [Source:HGNC Symbol;Acc:HGNC:60]	protein_coding	12:21797389-21942543:-1	9	934	459	1194	491	1396	3344	2196	471	24	10518	17.406	2.222	12.589	15.486	36.204	17.985	20.792	28.985	27.341	3.364	0.722	0.05156	0.32832	0.26094	0.72437	0.35775	0.18739	0.35595	0.4617	0.04746	0.01483	1	Cluster 6 (undiff SPG)	0.362	0.163	0.199	0.199	0.47	7.11e-211	3.6e-206	undiff SPG	no	no	no
ABCD1	ENSG00000101986	ATP binding cassette subfamily D member 1 [Source:HGNC Symbol;Acc:HGNC:61]	protein_coding	X:153724856-153744755:1	60	159	116	170	99	26	54	42	92	14	832	1.377	14.815	2.143	3.914	5.155	3.626	0.387	0.468	0.523	0.657	0.421	0.43265	0.04489	0.04853	0.06582	0.05175	0.00434	0.00335	0.00435	0.01006	0.00679	0	.	.	.	.	.	.	.	.	.	no	no	no
ABCD1P2	ENSG00000215151	ATP binding cassette subfamily D member 1 pseudogene 2 [Source:HGNC Symbol;Acc:HGNC:63]	unprocessed_pseudogene	10:38601418-38605609:1	0	0	0	0	0	0	0	0	0	0	0	0	0	0	0	0	0	0	0	0	0	0	0	0	0	0	0	0	0	0	0	0	0	.	.	.	.	.	.	.	.	.	no	no	no
ABCD2	ENSG00000173208	ATP binding cassette subfamily D member 2 [Source:HGNC Symbol;Acc:HGNC:66]	protein_coding	12:39550033-39619803:-1	0	20	2	35	5	58	80	15	15	0	230	0.381	0	0.27	0.067	1.061	0.183	0.864	0.693	0.187	0.107	0	0	0.00328	0.00028	0.01467	0.00371	0.00617	0.00481	0.00247	0.00105	0	0	.	.	.	.	.	.	.	.	.	no	no	no
ABCD3	ENSG00000117528	ATP binding cassette subfamily D member 3 [Source:HGNC Symbol;Acc:HGNC:67]	protein_coding	1:94418389-94518666:1	79	606	286	686	540	574	1185	323	309	52	4640	7.679	19.506	8.168	9.649	20.8	19.78	8.549	10.271	4.021	2.207	1.564	0.54431	0.1664	0.13989	0.35787	0.36606	0.0657	0.09124	0.0377	0.03152	0.03251	0	.	.	.	.	.	.	.	.	.	no	no	no
ABCD4	ENSG00000119688	ATP binding cassette subfamily D member 4 [Source:HGNC Symbol;Acc:HGNC:68]	protein_coding	14:74285269-74303055:-1	28	955	792	625	650	667	643	1138	406	30	5934	9.82	6.914	12.872	26.721	18.951	23.81	9.934	5.573	14.168	2.899	0.902	0.19452	0.31707	0.49358	0.32628	0.48415	0.11306	0.06015	0.21562	0.04086	0.01678	1	Cluster 7 (endothelia/macrophage)	0.267	0.089	0.178	0.178	0.377	2.63e-165	1.33e-160	endothelia/macrophage	no	no	yes
ABCE1	ENSG00000164163	ATP binding cassette subfamily E member 1 [Source:HGNC Symbol;Acc:HGNC:69]	protein_coding	4:145098288-145129524:1	53	1407	744	1576	1589	3035	5130	1521	639	110	15804	26.154	13.086	18.965	25.101	47.787	58.205	45.204	44.466	18.937	4.563	3.308	0.36907	0.4631	0.42287	1.14775	1.81826	0.57606	0.61764	0.23158	0.06814	0.06428	2	Cluster 6 (undiff SPG) | Cluster 8 (diff SPG/early meiosis)	0.478 | 0.582	0.249 | 0.246	0.229 | 0.336	0.336	0.600 | 1.017	3.898e-258 | 0.000e+00	1.972e-253 | 0.000e+00	.	no	no	no
ABCF1	ENSG00000204574	ATP binding cassette subfamily F member 1 [Source:HGNC Symbol;Acc:HGNC:70]	protein_coding	6:30571393-30597179:1	85	1558	815	1784	1376	4115	4768	2205	4071	541	21318	35.279	20.988	21	27.497	54.093	50.403	61.29	41.328	27.453	29.072	16.271	0.63409	0.51456	0.52395	1.42755	1.45549	1.25038	0.59483	0.36092	0.48227	0.37525	3	Cluster 6 (undiff SPG) | Cluster 8 (diff SPG/early meiosis) | Cluster 4 (spermatocyte)	0.541 | 0.504 | 0.613	0.342 | 0.346 | 0.32	0.199 | 0.158 | 0.293	0.293	0.578 | 0.589 | 0.495	2.724e-216 | 6.971e-200 | 0.000e+00	1.378e-211 | 3.526e-195 | 0.000e+00	.	no	no	no
ABCF2	ENSG00000033050	ATP binding cassette subfamily F member 2 [Source:HGNC Symbol;Acc:HGNC:71]	protein_coding	7:151211484-151227205:-1	37	583	366	479	444	2385	3196	1797	2252	194	11733	19.417	9.136	7.858	12.348	14.524	16.264	35.523	27.702	22.373	16.082	5.835	0.22934	0.16813	0.181	0.23098	0.29834	0.41782	0.28519	0.23543	0.18806	0.10162	0	.	.	.	.	.	.	.	.	.	no	no	no
ABCF2-H2BE1	ENSG00000285292	ABCF2-H2BE1 readthrough [Source:HGNC Symbol;Acc:HGNC:54751]	protein_coding	7:151207837-151227166:-1	0	23	26	2	1	2	5	4	9	1	73	0.121	0	0.31	0.877	0.061	0.037	0.03	0.043	0.05	0.064	0.03	0	0.00587	0.01216	0.00045	0.00081	8e-05	0.00025	0.00093	0.00048	0.0008	0	.	.	.	.	.	.	.	.	.	no	no	no
ABCF2P2	ENSG00000228769	ATP binding cassette subfamily F member 2 pseudogene 2 [Source:HGNC Symbol;Acc:HGNC:48842]	unprocessed_pseudogene	7:72103181-72104209:1	0	0	0	6	4	4	1	0	2	0	17	0.028	0	0	0	0.182	0.147	0.06	0.009	0	0.014	0	0	0	0	0.00262	0.00147	0.00022	2e-05	0	5e-05	0	0	.	.	.	.	.	.	.	.	.	no	no	no
ABCF3	ENSG00000161204	ATP binding cassette subfamily F member 3 [Source:HGNC Symbol;Acc:HGNC:72]	protein_coding	3:184186023-184194012:1	29	578	357	502	484	1207	1415	306	406	38	5322	8.807	7.16	7.791	12.045	15.221	17.729	17.977	12.265	3.81	2.899	1.143	0.21281	0.17214	0.17215	0.25002	0.29909	0.16311	0.11372	0.03336	0.03641	0.01715	0	.	.	.	.	.	.	.	.	.	no	no	no
ABCG1	ENSG00000160179	ATP binding cassette subfamily G member 1 [Source:HGNC Symbol;Acc:HGNC:73]	protein_coding	21:42199689-42297244:1	3	94	483	126	40	82	918	267	430	68	2511	4.155	0.741	1.267	16.296	3.82	1.465	1.221	7.957	3.324	3.071	2.045	0.00963	0.02656	0.25157	0.05053	0.01717	0.01091	0.0702	0.02909	0.03181	0.02876	0	.	.	.	.	.	.	.	.	.	no	no	no
ABCG2	ENSG00000118777	ATP binding cassette subfamily G member 2 (Junior blood group) [Source:HGNC Symbol;Acc:HGNC:74]	protein_coding	4:88090150-88231628:-1	3	122	644	485	122	120	331	408	133	11	2379	3.937	0.741	1.644	21.727	14.706	4.469	1.787	2.869	5.08	0.95	0.331	0.01144	0.03674	0.41199	0.22895	0.06173	0.01406	0.02442	0.05689	0.00988	0.0058	0	.	.	.	.	.	.	.	.	.	no	no	no
ABCG4	ENSG00000172350	ATP binding cassette subfamily G member 4 [Source:HGNC Symbol;Acc:HGNC:13884]	protein_coding	11:119149052-119162653:1	0	3	1	22	15	344	163	55	52	14	669	1.107	0	0.04	0.034	0.667	0.549	5.124	1.413	0.685	0.371	0.421	0	0.0007	0.00103	0.0102	0.00676	0.0336	0.01117	0.00629	0.00436	0.00692	0	.	.	.	.	.	.	.	.	.	no	no	no
ABCG5	ENSG00000138075	ATP binding cassette subfamily G member 5 [Source:HGNC Symbol;Acc:HGNC:13886]	protein_coding	2:43812472-43838865:-1	0	46	35	86	34	144	252	66	28	6	697	1.153	0	0.62	1.181	2.608	1.245	2.145	2.184	0.822	0.2	0.18	0	0.01439	0.01398	0.037	0.01709	0.01318	0.01792	0.00951	0.00289	0.00319	0	.	.	.	.	.	.	.	.	.	no	no	no
ABCG8	ENSG00000143921	ATP binding cassette subfamily G member 8 [Source:HGNC Symbol;Acc:HGNC:13887]	protein_coding	2:43831942-43882988:1	0	240	109	218	206	405	648	658	535	42	3061	5.066	0	3.235	3.677	6.61	7.546	6.032	5.617	8.192	3.821	1.263	0	0.07844	0.06402	0.09399	0.12452	0.04303	0.04535	0.1153	0.04405	0.01931	0	.	.	.	.	.	.	.	.	.	no	no	no
ABHD1	ENSG00000143994	abhydrolase domain containing 1 [Source:HGNC Symbol;Acc:HGNC:17553]	protein_coding	2:27123789-27130812:1	53	429	176	306	386	4961	8511	5085	10158	3027	33092	54.764	13.086	5.782	5.938	9.278	14.139	73.89	73.771	63.309	72.542	91.038	0.54922	0.14506	0.11752	0.19683	0.34073	2.47425	2.20413	1.56075	2.20796	6.39079	2	Cluster 4 (spermatocyte) | Cluster 5 (late spermatid 2)	0.739 | 0.91	0.524 | 0.527	0.215 | 0.383	0.383	0.344 | 1.533	2.840e-260 | 0.000e+00	1.437e-255 | 0.000e+00	.	no	no	no
ABHD10	ENSG00000144827	abhydrolase domain containing 10, depalmitoylase [Source:HGNC Symbol;Acc:HGNC:25656]	protein_coding	3:111979010-111993368:1	49	433	273	1295	962	641	240	98	187	20	4198	6.947	12.099	5.836	9.211	39.266	35.238	9.547	2.08	1.22	1.335	0.602	0.35243	0.11843	0.13777	0.8003	0.73477	0.09967	0.01899	0.01653	0.0214	0.00848	2	Cluster 6 (undiff SPG) | Cluster 8 (diff SPG/early meiosis)	0.393 | 0.352	0.051 | 0.056	0.342 | 0.296	0.342	0.732 | 0.665	0.000e+00 | 0.000e+00	0.000e+00 | 0.000e+00	.	no	no	no
ABHD11	ENSG00000106077	abhydrolase domain containing 11 [Source:HGNC Symbol;Acc:HGNC:16407]	protein_coding	7:73736094-73738852:-1	62	226	274	116	175	143	133	61	81	22	1293	2.14	15.309	3.046	9.244	3.517	6.41	2.13	1.153	0.759	0.578	0.662	0.39913	0.06322	0.151	0.05105	0.09525	0.01887	0.01122	0.00979	0.00809	0.00931	0	.	.	.	.	.	.	.	.	.	no	no	no
ABHD11-AS1	ENSG00000225969	ABHD11 antisense RNA 1 (tail to tail) [Source:HGNC Symbol;Acc:HGNC:18289]	transcribed_unitary_pseudogene	7:73735038-73736158:1	4	5	41	26	6	3	4	1	3	1	94	0.156	0.988	0.067	1.383	0.788	0.22	0.045	0.035	0.012	0.021	0.03	0.02173	0.00045	0.01239	0.00853	0.00355	0.00025	0.0002	3e-05	0.00017	0.00023	0	.	.	.	.	.	.	.	.	.	no	no	no
ABHD12	ENSG00000100997	abhydrolase domain containing 12, lysophospholipase [Source:HGNC Symbol;Acc:HGNC:15868]	protein_coding	20:25294742-25390835:-1	31	824	419	996	555	1187	2514	1442	2626	603	11197	18.53	7.654	11.107	14.136	30.2	20.33	17.679	21.791	17.953	18.753	18.135	0.17889	0.2332	0.23493	0.52555	0.36474	0.13758	0.19231	0.15427	0.21946	0.36593	1	Cluster 6 (undiff SPG)	0.302	0.179	0.123	0.123	0.331	6.9e-137	3.49e-132	undiff SPG	no	no	no
ABHD12B	ENSG00000131969	abhydrolase domain containing 12B [Source:HGNC Symbol;Acc:HGNC:19837]	protein_coding	14:50872053-50904970:1	1	59	28	98	22	59	862	501	431	22	2083	3.447	0.247	0.795	0.945	2.971	0.806	0.879	7.472	6.238	3.078	0.662	0.0082	0.01886	0.01666	0.03629	0.01186	0.00845	0.06808	0.06003	0.03105	0.01133	0	.	.	.	.	.	.	.	.	.	no	no	no
ABHD13	ENSG00000139826	abhydrolase domain containing 13 [Source:HGNC Symbol;Acc:HGNC:20293]	protein_coding	13:108218392-108234243:1	29	630	363	423	386	2159	4027	973	654	108	9752	16.138	7.16	8.492	12.247	12.826	14.139	32.157	34.905	12.114	4.67	3.248	0.19924	0.19292	0.1721	0.20102	0.23532	0.35292	0.41018	0.10632	0.05991	0.06497	1	Cluster 1 (early spermatid 1)	0.349	0.117	0.232	0.232	0.287	0	0	early spermatid	no	no	no
ABHD14A	ENSG00000248487	abhydrolase domain containing 14A [Source:HGNC Symbol;Acc:HGNC:24538]	protein_coding	3:51971426-51981199:1	25	2155	417	1002	957	489	367	216	346	77	6051	10.014	6.173	29.047	14.069	30.382	35.055	7.283	3.181	2.689	2.471	2.316	0.16109	0.82275	0.21149	0.56193	0.81976	0.07034	0.03183	0.03042	0.0301	0.04336	3	Cluster 3 (myoid/Leydig) | Cluster 6 (undiff SPG) | Cluster 8 (diff SPG/early meiosis)	0.29 | 0.304 | 0.351	0.073 | 0.088 | 0.088	0.217 | 0.216 | 0.263	0.263	0.701 | 0.396 | 0.627	0.000e+00 | 1.758e-248 | 4.000e-303	0.000e+00 | 8.890e-244 | 2.000e-298	.	no	yes	no
ABHD14A-ACY1	ENSG00000114786	ABHD14A-ACY1 readthrough [Source:HGNC Symbol;Acc:HGNC:38856]	protein_coding	3:51974706-51989183:1	2	131	35	31	28	8	9	177	18	1	440	0.728	0.494	1.766	1.181	0.94	1.026	0.119	0.078	2.204	0.129	0.03	0.00828	0.04026	0.01992	0.01558	0.01401	0.00158	0.00094	0.02537	0.00133	0.00058	0	.	.	.	.	.	.	.	.	.	no	no	no
ABHD14B	ENSG00000114779	abhydrolase domain containing 14B [Source:HGNC Symbol;Acc:HGNC:28235]	protein_coding	3:51968510-51983409:-1	27	1910	876	96	98	41	51	232	367	88	3786	6.265	6.667	25.745	29.555	2.911	3.59	0.611	0.442	2.888	2.621	2.647	0.14226	0.66171	0.55292	0.04061	0.05075	0.00851	0.00403	0.03612	0.02696	0.05184	2	Cluster 3 (myoid/Leydig) | Cluster 7 (endothelia/macrophage)	0.257 | 0.296	0.035 | 0.051	0.222 | 0.245	0.245	0.655 | 0.488	0.000e+00 | 0.000e+00	0.000e+00 | 0.000e+00	.	no	yes	yes
ABHD15	ENSG00000168792	abhydrolase domain containing 15 [Source:HGNC Symbol;Acc:HGNC:26971]	protein_coding	17:29560547-29567037:-1	2	135	94	49	32	32	32	27	19	3	425	0.703	0.494	1.82	3.171	1.486	1.172	0.477	0.277	0.336	0.136	0.09	0.01485	0.03968	0.05563	0.01926	0.01396	0.00474	0.00184	0.00453	0.00141	0.0021	0	.	.	.	.	.	.	.	.	.	no	no	no
ABHD15-AS1	ENSG00000264031	ABHD15 antisense RNA 1 [Source:HGNC Symbol;Acc:HGNC:49685]	lncRNA	17:29560547-29707090:1	0	0	0	0	0	0	3	4	0	0	7	0.012	0	0	0	0	0	0	0.026	0.05	0	0	0	0	0	0	0	0	0.00026	0.00021	0	0	0	.	.	.	.	.	.	.	.	.	no	no	no
ABHD16A	ENSG00000204427	abhydrolase domain containing 16A, phospholipase [Source:HGNC Symbol;Acc:HGNC:13921]	protein_coding	6:31686955-31703356:-1	4	57	46	45	74	458	521	173	50	9	1437	2.378	0.988	0.768	1.552	1.364	2.711	6.822	4.516	2.154	0.357	0.271	0.02641	0.01327	0.01652	0.02268	0.03512	0.05034	0.03461	0.01662	0.00457	0.00509	0	.	.	.	.	.	.	.	.	.	no	no	no
ABHD17A	ENSG00000129968	abhydrolase domain containing 17A, depalmitoylase [Source:HGNC Symbol;Acc:HGNC:28756]	protein_coding	19:1876810-1885496:-1	100	1695	1186	799	521	964	2035	787	906	66	9059	14.992	24.691	22.847	40.013	24.227	19.084	14.358	17.639	9.798	6.47	1.985	0.79818	0.55121	0.91485	0.44834	0.35293	0.14119	0.15628	0.09206	0.07211	0.0423	1	Cluster 7 (endothelia/macrophage)	0.4	0.137	0.263	0.263	0.674	0	0	endothelia/macrophage	no	no	yes
ABHD17AP3	ENSG00000250536	ABHD17A pseudogene 3 [Source:HGNC Symbol;Acc:HGNC:34041]	unprocessed_pseudogene	1:214605470-214608840:-1	0	9	0	79	29	82	81	16	22	0	318	0.526	0	0.121	0	2.395	1.062	1.221	0.702	0.199	0.157	0	0	0.00262	0	0.02865	0.01523	0.01052	0.00636	0.00126	0.00107	0	0	.	.	.	.	.	.	.	.	.	no	no	no
ABHD17AP4	ENSG00000229107	ABHD17A pseudogene 4 [Source:HGNC Symbol;Acc:HGNC:34042]	processed_pseudogene	22:20667836-20670984:-1	0	0	0	3	0	0	0	0	0	0	3	0.005	0	0	0	0.091	0	0	0	0	0	0	0	0	0	0.00208	0	0	0	0	0	0	0	.	.	.	.	.	.	.	.	.	no	no	no
ABHD17AP5	ENSG00000263366	ABHD17A pseudogene 5 [Source:HGNC Symbol;Acc:HGNC:34043]	processed_pseudogene	22:22114844-22118005:-1	0	0	0	3	3	3	1	0	0	0	10	0.017	0	0	0	0.091	0.11	0.045	0.009	0	0	0	0	0	0	0.00159	0.00114	0.00014	4e-05	0	0	0	0	.	.	.	.	.	.	.	.	.	no	no	no
ABHD17AP6	ENSG00000226981	ABHD17A pseudogene 6 [Source:HGNC Symbol;Acc:HGNC:34044]	unprocessed_pseudogene	17:20814620-20844257:1	0	0	0	3	2	8	3	4	2	0	22	0.036	0	0	0	0.091	0.073	0.119	0.026	0.05	0.014	0	0	0	0	0.00126	0.00134	0.00148	0.00021	0.00023	8e-05	0	0	.	.	.	.	.	.	.	.	.	no	no	no
ABHD17B	ENSG00000107362	abhydrolase domain containing 17B, depalmitoylase [Source:HGNC Symbol;Acc:HGNC:24278]	protein_coding	9:71862452-71911193:-1	60	380	222	239	381	2009	2999	849	590	47	7776	12.868	14.815	5.122	7.49	7.247	13.956	29.923	25.995	10.57	4.213	1.414	0.49212	0.1135	0.10846	0.09682	0.24812	0.29596	0.25334	0.09647	0.05506	0.02373	0	.	.	.	.	.	.	.	.	.	no	no	no
ABHD17C	ENSG00000136379	abhydrolase domain containing 17C, depalmitoylase [Source:HGNC Symbol;Acc:HGNC:26925]	protein_coding	15:80679684-80755621:1	31	42	46	207	147	23	13	20	39	6	574	0.95	7.654	0.566	1.552	6.277	5.385	0.343	0.113	0.249	0.279	0.18	0.23344	0.01103	0.02009	0.08695	0.07684	0.00399	0.00092	0.0023	0.00443	0.00391	0	.	.	.	.	.	.	.	.	.	no	no	no
ABHD18	ENSG00000164074	abhydrolase domain containing 18 [Source:HGNC Symbol;Acc:HGNC:26111]	protein_coding	4:127965306-128039953:1	7	451	292	290	209	400	918	487	153	16	3223	5.334	1.728	6.079	9.852	8.793	7.656	5.958	7.957	6.063	1.093	0.481	0.04653	0.14235	0.14508	0.14315	0.13819	0.05448	0.06863	0.06531	0.01312	0.0081	0	.	.	.	.	.	.	.	.	.	no	no	no
ABHD2	ENSG00000140526	abhydrolase domain containing 2, acylglycerol lipase [Source:HGNC Symbol;Acc:HGNC:18717]	protein_coding	15:89087459-89202355:1	62	1522	450	443	745	4875	8254	5588	9150	2260	33349	55.189	15.309	20.515	15.182	13.432	27.289	72.609	71.544	69.572	65.343	67.97	0.43985	0.50542	0.23113	0.24789	0.63337	1.97905	1.82812	2.08075	1.59139	2.48454	3	Cluster 4 (spermatocyte) | Cluster 2 (early spermatid 2) | Cluster 5 (late spermatid 2)	0.726 | 0.696 | 0.68	0.53 | 0.53 | 0.544	0.196 | 0.166 | 0.136	0.196	0.308 | 0.375 | 0.532	1.554e-215 | 7.373e-240 | 1.346e-199	7.861e-211 | 3.729e-235 | 6.810e-195	.	no	no	no
ABHD3	ENSG00000158201	abhydrolase domain containing 3, phospholipase [Source:HGNC Symbol;Acc:HGNC:18718]	protein_coding	18:21650901-21704780:-1	16	328	154	290	152	505	463	403	151	10	2472	4.091	3.951	4.421	5.196	8.793	5.568	7.522	4.013	5.017	1.078	0.301	0.09117	0.09672	0.09794	0.12923	0.0895	0.06022	0.03137	0.0458	0.0158	0.00643	0	.	.	.	.	.	.	.	.	.	no	no	no
ABHD4	ENSG00000100439	abhydrolase domain containing 4, N-acyl phospholipase B [Source:HGNC Symbol;Acc:HGNC:20154]	protein_coding	14:22598237-22613215:1	138	273	146	25	10	58	113	238	234	34	1269	2.1	34.074	3.68	4.926	0.758	0.366	0.864	0.979	2.963	1.671	1.023	1.34953	0.0698	0.05756	0.01321	0.00411	0.00859	0.00847	0.03306	0.0241	0.02052	1	Cluster 9 (Sertoli)	0.341	0.019	0.322	0.322	1.195	2.11e-185	1.07e-180	Sertoli	yes	no	no
ABHD5	ENSG00000011198	abhydrolase domain containing 5, lysophosphatidic acid acyltransferase [Source:HGNC Symbol;Acc:HGNC:21396]	protein_coding	3:43690108-43734371:1	23	735	494	1429	1478	2238	2283	758	752	149	10339	17.11	5.679	9.907	16.667	43.329	54.139	33.333	19.789	9.437	5.37	4.481	0.19286	0.22358	0.33178	0.89332	1.49007	0.38078	0.1886	0.08951	0.07162	0.0831	2	Cluster 6 (undiff SPG) | Cluster 8 (diff SPG/early meiosis)	0.433 | 0.541	0.156 | 0.154	0.277 | 0.387	0.387	0.614 | 1.035	0.000e+00 | 0.000e+00	0.000e+00 | 0.000e+00	.	no	no	no
ABHD6	ENSG00000163686	abhydrolase domain containing 6, acylglycerol lipase [Source:HGNC Symbol;Acc:HGNC:21398]	protein_coding	3:58237532-58295693:1	9	314	551	129	60	37	53	62	67	8	1290	2.135	2.222	4.232	18.59	3.911	2.198	0.551	0.459	0.772	0.478	0.241	0.05202	0.08727	0.28962	0.05559	0.03044	0.00299	0.00354	0.00952	0.00608	0.00401	0	.	.	.	.	.	.	.	.	.	no	no	no
ABHD8	ENSG00000127220	abhydrolase domain containing 8 [Source:HGNC Symbol;Acc:HGNC:23759]	protein_coding	19:17292131-17310236:-1	46	744	230	104	127	3676	5649	2533	5522	1292	19923	32.97	11.358	10.028	7.76	3.153	4.652	54.751	48.964	31.536	39.434	38.857	0.34382	0.2142	0.12179	0.06114	0.07879	1.19637	0.89138	0.38847	0.66941	1.10134	3	Cluster 4 (spermatocyte) | Cluster 1 (early spermatid 1) | Cluster 5 (late spermatid 2)	0.548 | 0.49 | 0.389	0.302 | 0.292 | 0.326	0.246 | 0.198 | 0.063	0.246	0.513 | 0.291 | 0.408	0.000e+00 | 0.000e+00 | 2.204e-143	0.000e+00 | 0.000e+00 | 1.115e-138	.	no	no	no
ABI1	ENSG00000136754	abl interactor 1 [Source:HGNC Symbol;Acc:HGNC:11320]	protein_coding	10:26746593-26861087:-1	82	797	698	570	285	243	479	539	277	34	4004	6.626	20.247	10.743	23.549	17.283	10.44	3.619	4.152	6.711	1.978	1.023	0.69607	0.23762	0.40307	0.2826	0.16177	0.03338	0.03645	0.08113	0.028	0.02188	0	.	.	.	.	.	.	.	.	.	no	no	no
ABI1P1	ENSG00000271484	abl interactor 1 pseudogene 1 [Source:HGNC Symbol;Acc:HGNC:20035]	unprocessed_pseudogene	14:55546674-55548123:1	0	9	1	4	0	1	3	2	0	0	20	0.033	0	0.121	0.034	0.121	0	0.015	0.026	0.025	0	0	0	0.0031	0.00112	0.0013	0	0.00023	8e-05	0.00053	0	0	0	.	.	.	.	.	.	.	.	.	no	no	no
ABI2	ENSG00000138443	abl interactor 2 [Source:HGNC Symbol;Acc:HGNC:24011]	protein_coding	2:203328280-203447728:1	95	1877	862	1546	1169	3775	6909	3483	3775	243	23734	39.277	23.457	25.3	29.082	46.877	42.821	56.226	59.886	43.364	26.959	7.308	0.84052	0.65518	0.58206	1.08299	1.03637	0.9196	1.07514	0.63567	0.37193	0.13932	3	Cluster 6 (undiff SPG) | Cluster 8 (diff SPG/early meiosis) | Cluster 1 (early spermatid 1)	0.469 | 0.428 | 0.599	0.388 | 0.391 | 0.344	0.081 | 0.037 | 0.255	0.255	0.306 | 0.268 | 0.358	5.009e-78 | 2.666e-66 | 0.000e+00	2.534e-73 | 1.348e-61 | 0.000e+00	.	no	no	no
ABI3	ENSG00000108798	ABI family member 3 [Source:HGNC Symbol;Acc:HGNC:29859]	protein_coding	17:49210411-49223225:1	2	7	696	35	6	41	33	12	23	1	856	1.417	0.494	0.094	23.482	1.061	0.22	0.611	0.286	0.149	0.164	0.03	0.00416	0.00265	0.44666	0.01181	0.00313	0.00449	0.00281	0.00129	0.00184	0.00033	0	.	.	.	.	.	.	.	.	.	no	no	no
ABI3BP	ENSG00000154175	ABI family member 3 binding protein [Source:HGNC Symbol;Acc:HGNC:17265]	protein_coding	3:100749156-100993515:-1	7	1718	174	150	91	225	2068	1142	606	67	6248	10.34	1.728	23.157	5.87	4.548	3.333	3.351	17.925	14.218	4.328	2.015	0.04728	0.76718	0.0994	0.06146	0.05599	0.02789	0.18814	0.16936	0.0461	0.0337	0	.	.	.	.	.	.	.	.	.	no	no	no
ABITRAM	ENSG00000119328	actin binding transcription modulator [Source:HGNC Symbol;Acc:HGNC:1364]	protein_coding	9:108934400-108950744:1	15	519	193	257	369	1745	1537	319	389	28	5371	8.888	3.704	6.996	6.511	7.793	13.516	25.99	13.322	3.972	2.778	0.842	0.09677	0.14417	0.08727	0.12186	0.21738	0.27548	0.11664	0.03543	0.03353	0.01948	0	.	.	.	.	.	.	.	.	.	no	no	no
ABITRAMP1	ENSG00000251106	ABITRAM pseudogene 1 [Source:HGNC Symbol;Acc:HGNC:39851]	processed_pseudogene	13:46270077-46270617:1	0	0	0	0	0	1	2	0	0	0	3	0.005	0	0	0	0	0	0.015	0.017	0	0	0	0	0	0	0	0	6e-05	0.00014	0	0	0	0	.	.	.	.	.	.	.	.	.	no	no	no
ABL1	ENSG00000097007	ABL proto-oncogene 1, non-receptor tyrosine kinase [Source:HGNC Symbol;Acc:HGNC:76]	protein_coding	9:130713016-130887675:1	19	707	228	467	414	728	1257	273	348	77	4518	7.477	4.691	9.53	7.692	14.16	15.165	10.843	10.895	3.399	2.485	2.316	0.12569	0.19268	0.09385	0.22423	0.25884	0.08482	0.08442	0.03016	0.0286	0.03792	0	.	.	.	.	.	.	.	.	.	no	no	no
ABL2	ENSG00000143322	ABL proto-oncogene 2, non-receptor tyrosine kinase [Source:HGNC Symbol;Acc:HGNC:77]	protein_coding	1:179099330-179229684:-1	22	983	694	1040	697	837	1301	1054	775	144	7547	12.489	5.432	13.25	23.414	31.534	25.531	12.466	11.277	13.123	5.535	4.331	0.17182	0.31777	0.44612	0.6004	0.49484	0.11257	0.1075	0.15572	0.06785	0.08267	2	Cluster 6 (undiff SPG) | Cluster 8 (diff SPG/early meiosis)	0.315 | 0.255	0.114 | 0.119	0.201 | 0.136	0.201	0.455 | 0.345	6.287e-228 | 4.180e-103	3.180e-223 | 2.114e-98	.	no	no	no
ABLIM1	ENSG00000099204	actin binding LIM protein 1 [Source:HGNC Symbol;Acc:HGNC:78]	protein_coding	10:114431113-114768061:-1	26	4720	1121	319	205	335	3607	3250	3832	449	17864	29.563	6.42	63.62	37.821	9.673	7.509	4.99	31.265	40.463	27.366	13.504	0.16581	3.19534	1.01804	0.16458	0.14467	0.05344	0.42376	0.57736	0.37216	0.26139	1	Cluster 3 (myoid/Leydig)	0.636	0.248	0.388	0.388	1.607	0	0	myoid/Leydig	no	yes	no
ABLIM2	ENSG00000163995	actin binding LIM protein family member 2 [Source:HGNC Symbol;Acc:HGNC:19195]	protein_coding	4:7965310-8158832:-1	4	67	26	160	54	22	64	135	211	29	772	1.278	0.988	0.903	0.877	4.851	1.978	0.328	0.555	1.681	1.507	0.872	0.01009	0.01661	0.01214	0.06367	0.02343	0.00331	0.00356	0.01405	0.01242	0.01263	0	.	.	.	.	.	.	.	.	.	no	no	no
ABLIM3	ENSG00000173210	actin binding LIM protein family member 3 [Source:HGNC Symbol;Acc:HGNC:29132]	protein_coding	5:149141483-149260542:1	2	27	226	58	70	26	32	162	82	5	690	1.142	0.494	0.364	7.625	1.759	2.564	0.387	0.277	2.017	0.586	0.15	0.01254	0.0057	0.09302	0.02145	0.04174	0.0045	0.00193	0.02242	0.00505	0.00199	0	.	.	.	.	.	.	.	.	.	no	no	no
ABO	ENSG00000175164	ABO, alpha 1-3-N-acetylgalactosaminyltransferase and alpha 1-3-galactosyltransferase [Source:HGNC Symbol;Acc:HGNC:79]	protein_coding	9:133233278-133276024:-1	25	605	210	352	210	771	2182	851	440	114	5760	9.532	6.173	8.155	7.085	10.673	7.692	11.483	18.913	10.595	3.142	3.429	0.15632	0.18736	0.09092	0.15016	0.13788	0.08558	0.17934	0.13418	0.04247	0.07315	0	.	.	.	.	.	.	.	.	.	no	no	no
ABR	ENSG00000159842	ABR activator of RhoGEF and GTPase [Source:HGNC Symbol;Acc:HGNC:81]	protein_coding	17:1003519-1229738:-1	13	400	557	327	134	127	375	1387	3399	787	7506	12.422	3.21	5.392	18.792	9.915	4.908	1.892	3.25	17.268	24.273	23.669	0.08457	0.11409	0.3076	0.1449	0.07538	0.02683	0.03156	0.19067	0.32133	0.52438	0	.	.	.	.	.	.	.	.	.	no	no	no
ABRA	ENSG00000174429	actin binding Rho activating protein [Source:HGNC Symbol;Acc:HGNC:30655]	protein_coding	8:106759483-106770244:-1	14	138	76	113	83	365	6813	1985	430	34	10051	16.633	3.457	1.86	2.564	3.426	3.04	5.436	59.053	24.714	3.071	1.023	0.09461	0.04256	0.03758	0.06281	0.05216	0.06676	1.2735	0.36009	0.05477	0.0204	1	Cluster 1 (early spermatid 1)	0.591	0.066	0.525	0.525	1.045	0	0	early spermatid	no	no	no
ABRACL	ENSG00000146386	ABRA C-terminal like [Source:HGNC Symbol;Acc:HGNC:21230]	protein_coding	6:139028745-139043302:1	230	398	710	694	72	121	144	129	313	56	2867	4.745	56.79	5.365	23.954	21.043	2.637	1.802	1.248	1.606	2.235	1.684	3.12257	0.11533	0.46595	0.35745	0.04743	0.02327	0.01298	0.02358	0.04082	0.03991	1	Cluster 9 (Sertoli)	0.568	0.044	0.524	0.524	1.934	0	0	Sertoli	yes	no	no
ABRAXAS1	ENSG00000163322	abraxas 1, BRCA1 A complex subunit [Source:HGNC Symbol;Acc:HGNC:25829]	protein_coding	4:83459517-83523348:-1	19	790	431	1257	1121	1257	3789	2479	2183	255	13581	22.475	4.691	10.648	14.541	38.114	41.062	18.722	32.842	30.864	15.59	7.669	0.13153	0.25076	0.21957	0.78806	0.98579	0.18392	0.3764	0.36447	0.17728	0.13649	2	Cluster 6 (undiff SPG) | Cluster 8 (diff SPG/early meiosis)	0.381 | 0.411	0.216 | 0.216	0.165 | 0.195	0.195	0.468 | 0.625	9.434e-201 | 6.222e-286	4.772e-196 | 3.147e-281	.	no	no	no
ABRAXAS2	ENSG00000165660	abraxas 2, BRISC complex subunit [Source:HGNC Symbol;Acc:HGNC:28975]	protein_coding	10:124801819-124836667:1	28	528	348	475	467	750	1691	472	532	138	5429	8.984	6.914	7.117	11.741	14.403	17.106	11.171	14.657	5.876	3.799	4.15	0.21911	0.1524	0.18319	0.22672	0.28568	0.09077	0.12793	0.05547	0.04736	0.07636	0	.	.	.	.	.	.	.	.	.	no	no	no
ABT1	ENSG00000146109	activator of basal transcription 1 [Source:HGNC Symbol;Acc:HGNC:17369]	protein_coding	6:26596953-26600739:1	101	1040	743	659	935	1424	1140	2029	2327	556	10954	18.128	24.938	14.018	25.067	19.982	34.249	21.209	9.881	25.261	16.618	16.722	0.8261	0.31444	0.42696	0.32137	0.75427	0.19307	0.09101	0.32429	0.21442	0.35494	1	Cluster 8 (diff SPG/early meiosis)	0.342	0.174	0.168	0.168	0.495	1.25e-176	6.3e-172	diff SPG/early meiosis	no	no	no
ABT1P1	ENSG00000250496	activator of basal transcription 1 pseudogene 1 [Source:HGNC Symbol;Acc:HGNC:39557]	processed_pseudogene	4:99022311-99023131:-1	5	10	7	4	9	12	103	600	1286	377	2413	3.993	1.235	0.135	0.236	0.121	0.33	0.179	0.893	7.47	9.184	11.338	0.0373	0.00189	0.00185	0.00215	0.00427	0.00183	0.00724	0.06846	0.09381	0.21323	0	.	.	.	.	.	.	.	.	.	no	no	no
ABTB1	ENSG00000114626	ankyrin repeat and BTB domain containing 1 [Source:HGNC Symbol;Acc:HGNC:18275]	protein_coding	3:127672935-127680926:1	13	877	620	634	152	62	123	38	86	27	2632	4.356	3.21	11.821	20.918	19.224	5.568	0.923	1.066	0.473	0.614	0.812	0.06157	0.2746	0.34978	0.32406	0.07947	0.01017	0.00995	0.00438	0.00719	0.0141	0	.	.	.	.	.	.	.	.	.	no	no	no
ABTB2	ENSG00000166016	ankyrin repeat and BTB domain containing 2 [Source:HGNC Symbol;Acc:HGNC:23842]	protein_coding	11:34150987-34358010:-1	6	117	12	125	14	24	288	101	56	3	746	1.235	1.481	1.577	0.405	3.79	0.513	0.357	2.496	1.257	0.4	0.09	0.03658	0.03251	0.00428	0.05489	0.00702	0.00274	0.02171	0.01245	0.00477	0.00365	0	.	.	.	.	.	.	.	.	.	no	no	no
ACAA1	ENSG00000060971	acetyl-CoA acyltransferase 1 [Source:HGNC Symbol;Acc:HGNC:82]	protein_coding	3:38103129-38137242:-1	13	148	101	65	73	343	265	107	85	10	1210	2.002	3.21	1.995	3.408	1.971	2.674	5.109	2.297	1.332	0.607	0.301	0.08875	0.04363	0.04558	0.02962	0.04094	0.04539	0.02283	0.01353	0.0077	0.00461	0	.	.	.	.	.	.	.	.	.	no	no	no
ACAA2	ENSG00000167315	acetyl-CoA acyltransferase 2 [Source:HGNC Symbol;Acc:HGNC:83]	protein_coding	18:49782164-49813953:-1	71	1850	675	1538	1380	1654	5222	2309	3921	1262	19882	32.903	17.531	24.936	22.773	46.634	50.549	24.635	45.263	28.748	28.001	37.955	0.56511	0.61698	0.39993	1.04001	1.38256	0.26734	0.61655	0.33598	0.38578	0.94385	3	Cluster 6 (undiff SPG) | Cluster 8 (diff SPG/early meiosis) | Cluster 5 (late spermatid 2)	0.466 | 0.505 | 0.38	0.321 | 0.321 | 0.326	0.145 | 0.184 | 0.054	0.184	0.421 | 0.656 | 0.346	1.320e-146 | 2.199e-273 | 5.228e-122	6.676e-142 | 1.112e-268 | 2.644e-117	.	no	no	no
ACACA	ENSG00000278540	acetyl-CoA carboxylase alpha [Source:HGNC Symbol;Acc:HGNC:84]	protein_coding	17:37084992-37406836:-1	30	514	211	438	630	428	3181	2907	2339	259	10937	18.1	7.407	6.928	7.119	13.281	23.077	6.375	27.572	36.193	16.704	7.789	0.1885	0.15239	0.10071	0.21682	0.45607	0.06385	0.31562	0.51531	0.22265	0.14219	1	Cluster 2 (early spermatid 2)	0.362	0.153	0.209	0.209	0.322	0	0	early spermatid	no	no	no
ACACB	ENSG00000076555	acetyl-CoA carboxylase beta [Source:HGNC Symbol;Acc:HGNC:85]	protein_coding	12:109116595-109268226:1	11	1428	980	319	197	385	3190	1681	1484	126	9801	16.22	2.716	19.248	33.063	9.673	7.216	5.734	27.65	20.929	10.598	3.789	0.09824	0.49475	0.76627	0.13734	0.12175	0.05045	0.30907	0.22772	0.12122	0.06064	1	Cluster 7 (endothelia/macrophage)	0.331	0.154	0.177	0.177	0.544	3.54e-221	1.79e-216	endothelia/macrophage	no	no	yes
ACAD10	ENSG00000111271	acyl-CoA dehydrogenase family member 10 [Source:HGNC Symbol;Acc:HGNC:21597]	protein_coding	12:111686053-111757107:1	8	322	203	433	321	638	1923	520	308	34	4710	7.795	1.975	4.34	6.849	13.129	11.758	9.503	16.668	6.474	2.2	1.023	0.08086	0.09687	0.09828	0.19527	0.20361	0.08268	0.17381	0.07479	0.02635	0.01878	0	.	.	.	.	.	.	.	.	.	no	no	no
ACAD11	ENSG00000240303	acyl-CoA dehydrogenase family member 11 [Source:HGNC Symbol;Acc:HGNC:30211]	protein_coding	3:132558138-132660082:-1	1	79	31	48	20	80	73	51	25	1	409	0.677	0.247	1.065	1.046	1.455	0.733	1.192	0.633	0.635	0.179	0.03	0.00256	0.02649	0.01085	0.02024	0.00995	0.00712	0.00451	0.00385	0.00194	0.00033	0	.	.	.	.	.	.	.	.	.	no	no	no
ACAD8	ENSG00000151498	acyl-CoA dehydrogenase family member 8 [Source:HGNC Symbol;Acc:HGNC:87]	protein_coding	11:134253548-134265855:1	44	512	297	487	627	761	806	344	301	28	4207	6.962	10.864	6.901	10.02	14.767	22.967	11.335	6.986	4.283	2.15	0.842	0.30652	0.15183	0.15374	0.22926	0.44311	0.09678	0.06047	0.03856	0.02385	0.01741	0	.	.	.	.	.	.	.	.	.	no	no	no
ACAD9	ENSG00000177646	acyl-CoA dehydrogenase family member 9 [Source:HGNC Symbol;Acc:HGNC:21497]	protein_coding	3:128879596-128924003:1	34	809	400	307	507	2532	3077	1625	1322	79	10692	17.694	8.395	10.904	13.495	9.309	18.571	37.712	26.671	20.232	9.441	2.376	0.20487	0.23914	0.20315	0.14554	0.34432	0.44169	0.27704	0.23444	0.11128	0.04166	1	Cluster 4 (spermatocyte)	0.377	0.152	0.225	0.225	0.267	0	0	spermatocyte	no	no	no
ACADL	ENSG00000115361	acyl-CoA dehydrogenase long chain [Source:HGNC Symbol;Acc:HGNC:88]	protein_coding	2:210187126-210225447:-1	5	1194	148	173	125	243	2934	2373	2469	396	10060	16.648	1.235	16.094	4.993	5.246	4.579	3.619	25.431	29.544	17.632	11.91	0.03156	0.40605	0.07564	0.07305	0.0827	0.03759	0.31056	0.34581	0.22485	0.25342	0	.	.	.	.	.	.	.	.	.	no	no	no
ACADM	ENSG00000117054	acyl-CoA dehydrogenase medium chain [Source:HGNC Symbol;Acc:HGNC:89]	protein_coding	1:75724431-75787575:1	104	1860	915	2464	1572	2560	3967	2546	1489	119	17596	29.119	25.679	25.071	30.87	74.712	57.582	38.129	34.385	31.698	10.633	3.579	0.79025	0.62327	0.59724	2.77477	1.82295	0.55365	0.41543	0.43925	0.13949	0.07154	2	Cluster 6 (undiff SPG) | Cluster 8 (diff SPG/early meiosis)	0.747 | 0.576	0.265 | 0.278	0.482 | 0.298	0.482	1.377 | 0.892	0.000e+00 | 0.000e+00	0.000e+00 | 0.000e+00	.	no	no	no
ACADS	ENSG00000122971	acyl-CoA dehydrogenase short chain [Source:HGNC Symbol;Acc:HGNC:90]	protein_coding	12:120725774-120740008:1	24	753	398	279	238	3638	2347	611	1016	212	9516	15.748	5.926	10.15	13.428	8.46	8.718	54.185	20.343	7.607	7.256	6.376	0.14616	0.22672	0.19842	0.12292	0.13945	0.8981	0.22863	0.06819	0.0954	0.1155	1	Cluster 4 (spermatocyte)	0.542	0.109	0.433	0.433	0.724	0	0	spermatocyte	no	no	no
ACADSB	ENSG00000196177	acyl-CoA dehydrogenase short/branched chain [Source:HGNC Symbol;Acc:HGNC:91]	protein_coding	10:123008979-123058290:1	36	491	250	304	244	773	1286	623	453	50	4510	7.464	8.889	6.618	8.435	9.218	8.938	11.513	11.147	7.756	3.235	1.504	0.26711	0.14141	0.1321	0.15824	0.13414	0.09447	0.09912	0.08272	0.04042	0.02648	0	.	.	.	.	.	.	.	.	.	no	no	no
ACADVL	ENSG00000072778	acyl-CoA dehydrogenase very long chain [Source:HGNC Symbol;Acc:HGNC:92]	protein_coding	17:7217125-7225266:1	46	3573	1104	663	1147	4195	6613	3201	5687	983	27212	45.033	11.358	48.16	37.247	20.103	42.015	62.481	57.32	39.853	40.613	29.564	0.33136	1.56255	0.77151	0.35952	1.15338	1.17639	1.02643	0.54645	0.64102	0.62222	1	Cluster 3 (myoid/Leydig)	0.482	0.446	0.036	0.036	0.517	0	0	myoid/Leydig	no	yes	no
ACAN	ENSG00000157766	aggrecan [Source:HGNC Symbol;Acc:HGNC:319]	protein_coding	15:88803436-88875353:1	0	43	23	156	112	35	64	81	119	23	656	1.086	0	0.58	0.776	4.73	4.103	0.521	0.555	1.008	0.85	0.692	0	0.01037	0.0118	0.0651	0.06944	0.00357	0.00637	0.01351	0.00927	0.00935	0	.	.	.	.	.	.	.	.	.	no	no	no
ACAP1	ENSG00000072818	ArfGAP with coiled-coil, ankyrin repeat and PH domains 1 [Source:HGNC Symbol;Acc:HGNC:16467]	protein_coding	17:7336529-7351477:1	110	1362	484	745	532	1577	6563	6246	12423	3266	33308	55.121	27.16	18.358	16.329	22.589	19.487	23.488	56.887	77.764	88.717	98.226	1.35324	0.51669	0.36354	0.41983	0.47107	0.35634	1.13606	3.29523	7.24463	22.5115	1	Cluster 0 (late spermatid 1) | Cluster 5 (late spermatid 2)	0.887 | 0.982	0.45 | 0.526	0.437 | 0.456	0.456	1.159 | 2.686	0.000e+00 | 0.000e+00	0.000e+00 | 0.000e+00	late spermatid	no	no	no
ACAP2	ENSG00000114331	ArfGAP with coiled-coil, ankyrin repeat and PH domains 2 [Source:HGNC Symbol;Acc:HGNC:16469]	protein_coding	3:195274745-195443044:-1	84	1642	1010	1048	639	2090	2026	457	358	59	9413	15.577	20.741	22.132	34.076	31.777	23.407	31.129	17.561	5.69	2.557	1.774	0.62479	0.553	0.68185	0.7024	0.49312	0.37372	0.20286	0.06753	0.04489	0.03849	2	Cluster 7 (endothelia/macrophage) | Cluster 6 (undiff SPG)	0.341 | 0.318	0.146 | 0.146	0.195 | 0.172	0.195	0.432 | 0.454	8.053e-163 | 1.105e-161	4.073e-158 | 5.591e-157	.	no	no	yes
ACAP2-IT1	ENSG00000229325	ACAP2 intronic transcript 1 [Source:HGNC Symbol;Acc:HGNC:41426]	lncRNA	3:195280723-195282741:-1	0	3	4	7	8	10	3	1	1	3	40	0.066	0	0.04	0.135	0.212	0.293	0.149	0.026	0.012	0.007	0.09	0	0.00098	0.00286	0.00285	0.00399	0.00068	0.00021	0.00027	2e-05	0.00244	0	.	.	.	.	.	.	.	.	.	no	no	no
ACAP3	ENSG00000131584	ArfGAP with coiled-coil, ankyrin repeat and PH domains 3 [Source:HGNC Symbol;Acc:HGNC:16754]	protein_coding	1:1292390-1309609:-1	5	579	111	901	150	81	77	174	334	68	2480	4.104	1.235	7.804	3.745	27.32	5.495	1.206	0.667	2.166	2.385	2.045	0.05386	0.17464	0.05172	0.51664	0.07443	0.01259	0.00542	0.02359	0.02493	0.0357	1	Cluster 6 (undiff SPG)	0.273	0.028	0.245	0.245	0.54	0	0	undiff SPG	no	no	no
ACAT1	ENSG00000075239	acetyl-CoA acetyltransferase 1 [Source:HGNC Symbol;Acc:HGNC:93]	protein_coding	11:108116695-108147603:1	121	2510	984	586	1094	5416	7272	5553	3382	162	27080	44.814	29.877	33.832	33.198	17.768	40.073	80.667	63.032	69.136	24.152	4.872	1.0652	0.90954	0.62006	0.29678	0.94595	3.07189	1.3183	1.99205	0.48169	0.10982	2	Cluster 4 (spermatocyte) | Cluster 2 (early spermatid 2)	0.807 | 0.691	0.403 | 0.411	0.404 | 0.280	0.404	1.064 | 0.539	0.000e+00 | 0.000e+00	0.000e+00 | 0.000e+00	.	no	no	no
ACAT2	ENSG00000120437	acetyl-CoA acetyltransferase 2 [Source:HGNC Symbol;Acc:HGNC:94]	protein_coding	6:159762045-159779112:1	38	435	168	410	481	575	2746	3987	3887	551	13278	21.974	9.383	5.863	5.668	12.432	17.619	8.564	23.802	49.639	27.758	16.571	0.26016	0.1232	0.08483	0.20081	0.3223	0.09141	0.29339	0.90798	0.36807	0.31589	1	Cluster 2 (early spermatid 2)	0.496	0.177	0.319	0.319	0.612	0	0	early spermatid	no	no	no
ACBD3	ENSG00000182827	acyl-CoA binding domain containing 3 [Source:HGNC Symbol;Acc:HGNC:15453]	protein_coding	1:226144679-226186741:-1	108	1406	650	932	1101	1089	2795	970	436	56	9543	15.793	26.667	18.951	21.93	28.26	40.33	16.22	24.226	12.077	3.114	1.684	0.90451	0.46114	0.36926	0.6021	1.32708	0.1674	0.30354	0.15244	0.05744	0.03627	3	Cluster 9 (Sertoli) | Cluster 6 (undiff SPG) | Cluster 8 (diff SPG/early meiosis)	0.267 | 0.283 | 0.403	0.157 | 0.151 | 0.146	0.110 | 0.132 | 0.257	0.257	0.572 | 0.338 | 0.912	2.429e-30 | 6.762e-95 | 0.000e+00	1.228e-25 | 3.420e-90 | 0.000e+00	.	yes	no	no
ACBD3-AS1	ENSG00000234478	ACBD3 antisense RNA 1 [Source:HGNC Symbol;Acc:HGNC:40701]	lncRNA	1:226148003-226155071:1	0	13	4	2	8	3	16	4	7	0	57	0.094	0	0.175	0.135	0.061	0.293	0.045	0.139	0.05	0.05	0	0	0.00281	0.0007	0.00109	0.00494	0.00017	0.00089	0.00086	0.00029	0	0	.	.	.	.	.	.	.	.	.	no	no	no
ACBD4	ENSG00000181513	acyl-CoA binding domain containing 4 [Source:HGNC Symbol;Acc:HGNC:23337]	protein_coding	17:45132600-45144181:1	3	353	196	77	113	38	118	170	125	29	1222	2.022	0.741	4.758	6.613	2.335	4.139	0.566	1.023	2.117	0.893	0.872	0.01034	0.09864	0.09361	0.02791	0.06986	0.00517	0.0096	0.0232	0.00904	0.01451	0	.	.	.	.	.	.	.	.	.	no	no	no
ACBD5	ENSG00000107897	acyl-CoA binding domain containing 5 [Source:HGNC Symbol;Acc:HGNC:23338]	protein_coding	10:27168135-27243046:-1	104	1030	627	544	605	2597	3552	2016	1225	55	12355	20.446	25.679	13.883	21.154	16.495	22.161	38.68	30.788	25.1	8.748	1.654	0.92773	0.32398	0.36366	0.25862	0.4278	0.47332	0.36566	0.32838	0.11039	0.02789	1	Cluster 9 (Sertoli)	0.257	0.204	0.053	0.053	0.584	1.5e-57	7.56e-53	Sertoli	yes	no	no
ACBD6	ENSG00000230124	acyl-CoA binding domain containing 6 [Source:HGNC Symbol;Acc:HGNC:23339]	protein_coding	1:180269653-180502954:-1	85	2039	645	1658	1247	4728	6721	2830	2407	348	22708	37.579	20.988	27.483	21.761	50.273	45.678	70.42	58.256	35.234	17.189	10.466	0.6742	0.70236	0.35979	1.17666	1.13215	1.80506	1.08259	0.4771	0.24518	0.20478	4	Cluster 6 (undiff SPG) | Cluster 8 (diff SPG/early meiosis) | Cluster 4 (spermatocyte) | Cluster 1 (early spermatid 1)	0.503 | 0.457 | 0.704 | 0.583	0.368 | 0.372 | 0.335 | 0.327	0.135 | 0.085 | 0.369 | 0.256	0.369	0.324 | 0.289 | 0.781 | 0.304	1.034e-79 | 1.793e-53 | 0.000e+00 | 0.000e+00	5.230e-75 | 9.070e-49 | 0.000e+00 | 0.000e+00	.	no	no	no
ACBD7	ENSG00000176244	acyl-CoA binding domain containing 7 [Source:HGNC Symbol;Acc:HGNC:17715]	protein_coding	10:15075475-15088776:-1	13	163	130	277	151	1362	1672	896	335	17	5016	8.301	3.21	2.197	4.386	8.399	5.531	20.286	14.493	11.155	2.392	0.511	0.08158	0.0493	0.06375	0.12063	0.08914	0.22513	0.14849	0.1353	0.02934	0.00808	0	.	.	.	.	.	.	.	.	.	no	no	no
ACCS	ENSG00000110455	1-aminocyclopropane-1-carboxylate synthase homolog (inactive) [Source:HGNC Symbol;Acc:HGNC:23989]	protein_coding	11:44065925-44084237:1	6	313	158	88	58	113	116	116	132	21	1121	1.855	1.481	4.219	5.331	2.668	2.125	1.683	1.005	1.444	0.943	0.632	0.0332	0.09476	0.07704	0.04195	0.03475	0.01019	0.00686	0.01646	0.01036	0.01234	0	.	.	.	.	.	.	.	.	.	no	no	no
ACCSL	ENSG00000205126	1-aminocyclopropane-1-carboxylate synthase homolog (inactive) like [Source:HGNC Symbol;Acc:HGNC:34391]	protein_coding	11:44047981-44059977:1	0	3	0	5	1	11	94	39	16	2	171	0.283	0	0.04	0	0.152	0.037	0.164	0.815	0.486	0.114	0.06	0	0.00112	0	0.00141	0.0007	0.00109	0.00542	0.00418	0.00087	0.0006	0	.	.	.	.	.	.	.	.	.	no	no	no
ACD	ENSG00000102977	ACD shelterin complex subunit and telomerase recruitment factor [Source:HGNC Symbol;Acc:HGNC:25070]	protein_coding	16:67657512-67660815:-1	22	685	411	825	951	1557	5112	1797	2724	122	14206	23.509	5.432	9.233	13.866	25.015	34.835	23.19	44.31	22.373	19.453	3.669	0.11269	0.20965	0.21186	0.43938	0.7419	0.29953	0.60532	0.22837	0.23549	0.06377	2	Cluster 8 (diff SPG/early meiosis) | Cluster 1 (early spermatid 1)	0.348 | 0.443	0.23 | 0.186	0.118 | 0.257	0.257	0.409 | 0.341	1.493e-138 | 0.000e+00	7.554e-134 | 0.000e+00	.	no	no	no
ACE	ENSG00000159640	angiotensin I converting enzyme [Source:HGNC Symbol;Acc:HGNC:2707]	protein_coding	17:63477061-63498380:1	59	329	491	525	307	1649	7888	6049	11477	3005	31779	52.591	14.568	4.435	16.565	15.919	11.245	24.561	68.371	75.311	81.961	90.376	0.61742	0.10863	0.34397	0.29388	0.25679	0.35226	1.73506	3.03047	3.83567	6.32697	2	Cluster 2 (early spermatid 2) | Cluster 0 (late spermatid 1) | Cluster 5 (late spermatid 2)	0.753 | 0.82 | 0.904	0.491 | 0.437 | 0.504	0.262 | 0.383 | 0.400	0.4	0.462 | 0.929 | 1.375	0.000e+00 | 0.000e+00 | 0.000e+00	0.000e+00 | 0.000e+00 | 0.000e+00	.	no	no	no
ACE2	ENSG00000130234	angiotensin I converting enzyme 2 [Source:HGNC Symbol;Acc:HGNC:13557]	protein_coding	X:15494566-15607236:-1	34	165	128	112	41	67	126	76	51	9	809	1.339	8.395	2.224	4.318	3.396	1.502	0.998	1.092	0.946	0.364	0.271	0.20028	0.05226	0.0926	0.04939	0.02176	0.00746	0.00831	0.01108	0.00499	0.00545	0	.	.	.	.	.	.	.	.	.	no	no	no
ACE3P	ENSG00000224353	angiotensin I converting enzyme 3, pseudogene [Source:HGNC Symbol;Acc:HGNC:44365]	transcribed_unprocessed_pseudogene	17:63507056-63519806:1	0	1	1	2	2	0	68	194	53	0	321	0.531	0	0.013	0.034	0.061	0.073	0	0.589	2.415	0.378	0	0	0.00051	0.00023	0.00148	0.00192	0	0.00414	0.02651	0.0038	0	0	.	.	.	.	.	.	.	.	.	no	no	no
ACER1	ENSG00000167769	alkaline ceramidase 1 [Source:HGNC Symbol;Acc:HGNC:18356]	protein_coding	19:6306142-6333612:-1	0	26	15	25	43	58	47	33	23	1	271	0.448	0	0.35	0.506	0.758	1.575	0.864	0.407	0.411	0.164	0.03	0	0.00915	0.00694	0.00914	0.02855	0.0052	0.0041	0.00461	0.00215	0.00088	0	.	.	.	.	.	.	.	.	.	no	no	no
ACER2	ENSG00000177076	alkaline ceramidase 2 [Source:HGNC Symbol;Acc:HGNC:23675]	protein_coding	9:19409009-19452505:1	0	6	47	24	24	230	128	281	315	60	1115	1.845	0	0.081	1.586	0.728	0.879	3.426	1.109	3.499	2.25	1.805	0	0.00169	0.01721	0.01491	0.01931	0.02696	0.00914	0.02741	0.02047	0.02889	0	.	.	.	.	.	.	.	.	.	no	no	no
ACER3	ENSG00000078124	alkaline ceramidase 3 [Source:HGNC Symbol;Acc:HGNC:16066]	protein_coding	11:76860859-77026797:1	27	1112	691	1016	1063	3643	6317	2769	1560	138	18336	30.344	6.667	14.989	23.313	30.807	38.938	54.26	54.754	34.475	11.14	4.15	0.1838	0.3702	0.4198	0.57164	0.93321	0.86753	0.89783	0.46274	0.14693	0.07533	3	Cluster 8 (diff SPG/early meiosis) | Cluster 4 (spermatocyte) | Cluster 1 (early spermatid 1)	0.389 | 0.543 | 0.548	0.299 | 0.274 | 0.246	0.090 | 0.269 | 0.302	0.302	0.378 | 0.352 | 0.422	2.443e-100 | 0.000e+00 | 0.000e+00	1.236e-95 | 0.000e+00 | 0.000e+00	.	no	no	no
ACHE	ENSG00000087085	acetylcholinesterase (Cartwright blood group) [Source:HGNC Symbol;Acc:HGNC:108]	protein_coding	7:100889994-100896974:-1	1	107	23	95	172	40	14	9	23	6	490	0.811	0.247	1.442	0.776	2.881	6.3	0.596	0.121	0.112	0.164	0.18	0.00184	0.02968	0.01163	0.0433	0.11396	0.00618	0.00201	0.00075	0.00123	0.00397	0	.	.	.	.	.	.	.	.	.	no	no	no
ACIN1	ENSG00000100813	apoptotic chromatin condensation inducer 1 [Source:HGNC Symbol;Acc:HGNC:17066]	protein_coding	14:23058564-23095614:-1	77	1414	865	1259	912	2897	4768	1988	832	63	15075	24.947	19.012	19.059	29.184	38.175	33.407	43.149	41.328	24.751	5.942	1.895	0.58953	0.49235	0.57197	0.96823	0.74562	0.66225	0.76784	0.61305	0.12291	0.04026	2	Cluster 6 (undiff SPG) | Cluster 1 (early spermatid 1)	0.382 | 0.413	0.242 | 0.211	0.140 | 0.202	0.202	0.406 | 0.285	2.765e-100 | 0.000e+00	1.399e-95 | 0.000e+00	.	no	no	no
ACKR1	ENSG00000213088	atypical chemokine receptor 1 (Duffy blood group) [Source:HGNC Symbol;Acc:HGNC:4035]	protein_coding	1:159203307-159206500:1	3	19	537	25	4	40	173	88	132	30	1051	1.739	0.741	0.256	18.117	0.758	0.147	0.596	1.5	1.096	0.943	0.902	0.06519	0.00623	1.67305	0.00889	0.00182	0.00524	0.01309	0.00947	0.01068	0.02198	0	.	.	.	.	.	.	.	.	.	no	no	no
ACKR2	ENSG00000144648	atypical chemokine receptor 2 [Source:HGNC Symbol;Acc:HGNC:1565]	protein_coding	3:42804752-42887974:1	1	192	117	316	139	278	490	290	95	11	1929	3.192	0.247	2.588	3.947	9.582	5.092	4.141	4.247	3.611	0.678	0.331	0.00959	0.05657	0.0633	0.13951	0.07237	0.03488	0.0368	0.04294	0.00805	0.00407	0	.	.	.	.	.	.	.	.	.	no	no	no
ACKR3	ENSG00000144476	atypical chemokine receptor 3 [Source:HGNC Symbol;Acc:HGNC:23692]	protein_coding	2:236567787-236582354:1	20	99	74	42	8	86	82	177	89	3	680	1.125	4.938	1.334	2.497	1.273	0.293	1.281	0.711	2.204	0.636	0.09	0.12951	0.02397	0.02676	0.02194	0.00539	0.01399	0.0054	0.02519	0.007	0.00151	0	.	.	.	.	.	.	.	.	.	no	no	no
ACKR4	ENSG00000129048	atypical chemokine receptor 4 [Source:HGNC Symbol;Acc:HGNC:1611]	protein_coding	3:132597270-132618967:1	1	100	62	21	12	94	155	324	38	3	810	1.34	0.247	1.348	2.092	0.637	0.44	1.4	1.344	4.034	0.271	0.09	0.00261	0.02479	0.0233	0.01178	0.00842	0.00881	0.01016	0.03456	0.00372	0.00137	0	.	.	.	.	.	.	.	.	.	no	no	no
ACLY	ENSG00000131473	ATP citrate lyase [Source:HGNC Symbol;Acc:HGNC:115]	protein_coding	17:41866917-41930542:-1	35	1084	486	879	592	1130	2583	2985	1689	123	11586	19.174	8.642	14.611	16.397	26.653	21.685	16.831	22.389	37.164	12.062	3.699	0.22299	0.32965	0.22775	0.47525	0.40007	0.16046	0.23567	0.49313	0.1529	0.06208	1	Cluster 2 (early spermatid 2)	0.372	0.164	0.208	0.208	0.28	0	0	early spermatid	no	no	no
ACMSD	ENSG00000153086	aminocarboxymuconate semialdehyde decarboxylase [Source:HGNC Symbol;Acc:HGNC:19288]	protein_coding	2:134838616-134902034:1	0	12	3	63	34	214	40	25	15	2	408	0.675	0	0.162	0.101	1.91	1.245	3.187	0.347	0.311	0.107	0.06	0	0.00357	0.0015	0.02078	0.01585	0.0367	0.00361	0.00339	0.00207	0.00127	0	.	.	.	.	.	.	.	.	.	no	no	no
ACNATP	ENSG00000227411	acyl-CoA:amino acid N-acyltransferase pseudogene [Source:HGNC Symbol;Acc:HGNC:34504]	unitary_pseudogene	9:101334084-101339347:-1	0	0	0	0	0	1	11	5	2	0	19	0.031	0	0	0	0	0	0.015	0.095	0.062	0.014	0	0	0	0	0	0	4e-05	0.00169	0.00048	4e-05	0	0	.	.	.	.	.	.	.	.	.	no	no	no
ACO1	ENSG00000122729	aconitase 1 [Source:HGNC Symbol;Acc:HGNC:117]	protein_coding	9:32384603-32454769:1	119	924	409	448	387	195	471	548	335	36	3872	6.408	29.383	12.455	13.799	13.584	14.176	2.904	4.083	6.823	2.392	1.083	1.02928	0.27256	0.19742	0.22539	0.25165	0.0231	0.03761	0.07663	0.03294	0.02039	1	Cluster 9 (Sertoli)	0.294	0.063	0.231	0.231	0.889	1.39e-84	7.03e-80	Sertoli	yes	no	no
ACO2	ENSG00000100412	aconitase 2 [Source:HGNC Symbol;Acc:HGNC:118]	protein_coding	22:41447830-41529273:1	12	536	273	598	342	610	819	481	241	20	3932	6.507	2.963	7.225	9.211	18.132	12.527	9.085	7.099	5.989	1.721	0.602	0.07288	0.16936	0.14395	0.28247	0.2065	0.07668	0.06675	0.07838	0.01915	0.01119	0	.	.	.	.	.	.	.	.	.	no	no	no
ACOD1	ENSG00000102794	aconitate decarboxylase 1 [Source:HGNC Symbol;Acc:HGNC:33904]	protein_coding	13:76948511-76958638:1	0	0	0	4	0	0	6	12	4	0	26	0.043	0	0	0	0.121	0	0	0.052	0.149	0.029	0	0	0	0	0.00132	0	0	0.00071	0.0017	0.00021	0	0	.	.	.	.	.	.	.	.	.	no	no	no
ACOT1	ENSG00000184227	acyl-CoA thioesterase 1 [Source:HGNC Symbol;Acc:HGNC:33128]	protein_coding	14:73537143-73543796:1	3	33	19	42	25	16	38	85	100	20	381	0.631	0.741	0.445	0.641	1.273	0.916	0.238	0.329	1.058	0.714	0.602	0.02271	0.00663	0.00531	0.01704	0.01354	0.00115	0.00322	0.00963	0.00806	0.00892	0	.	.	.	.	.	.	.	.	.	no	no	no
ACOT11	ENSG00000162390	acyl-CoA thioesterase 11 [Source:HGNC Symbol;Acc:HGNC:18156]	protein_coding	1:54542257-54639192:1	12	872	201	403	203	425	861	1435	2380	568	7360	12.18	2.963	11.754	6.781	12.22	7.436	6.33	7.463	17.866	16.996	17.083	0.08407	0.28953	0.10935	0.17747	0.12539	0.05508	0.06989	0.21992	0.22429	0.36386	0	.	.	.	.	.	.	.	.	.	no	no	no
ACOT12	ENSG00000172497	acyl-CoA thioesterase 12 [Source:HGNC Symbol;Acc:HGNC:24436]	protein_coding	5:81329996-81394179:-1	0	4	1	6	2	89	157	52	74	17	402	0.665	0	0.054	0.034	0.182	0.073	1.326	1.361	0.647	0.528	0.511	0	0.00045	0.00055	0.00209	0.00136	0.01091	0.01076	0.00611	0.00527	0.00922	0	.	.	.	.	.	.	.	.	.	no	no	no
ACOT13	ENSG00000112304	acyl-CoA thioesterase 13 [Source:HGNC Symbol;Acc:HGNC:20999]	protein_coding	6:24667035-24705065:1	85	898	393	924	701	5083	8970	5849	3651	277	26831	44.402	20.988	12.104	13.259	28.017	25.678	75.707	77.75	72.821	26.073	8.331	0.6921	0.28216	0.21259	0.60752	0.5933	2.3758	2.68543	3.54519	0.62875	0.17475	2	Cluster 4 (spermatocyte) | Cluster 1 (early spermatid 1) | Cluster 2 (early spermatid 2)	0.757 | 0.777 | 0.728	0.405 | 0.365 | 0.4	0.352 | 0.412 | 0.328	0.412	0.489 | 0.721 | 1.046	0.000e+00 | 0.000e+00 | 0.000e+00	0.000e+00 | 0.000e+00 | 0.000e+00	.	no	no	no
ACOT2	ENSG00000119673	acyl-CoA thioesterase 2 [Source:HGNC Symbol;Acc:HGNC:18431]	protein_coding	14:73567620-73575658:1	55	327	198	189	85	163	443	734	1376	328	3898	6.451	13.58	4.408	6.68	5.731	3.114	2.428	3.84	9.138	9.826	9.865	0.39463	0.0736	0.07926	0.09435	0.04774	0.02394	0.03399	0.08781	0.11593	0.19216	0	.	.	.	.	.	.	.	.	.	no	no	no
ACOT4	ENSG00000177465	acyl-CoA thioesterase 4 [Source:HGNC Symbol;Acc:HGNC:19748]	protein_coding	14:73591873-73595766:1	3	90	12	770	383	293	467	163	217	14	2412	3.992	0.741	1.213	0.405	23.347	14.029	4.364	4.048	2.029	1.55	0.421	0.01809	0.02275	0.00463	0.40644	0.23603	0.03547	0.03239	0.01745	0.01623	0.00743	0	.	.	.	.	.	.	.	.	.	no	no	no
ACOT6	ENSG00000205669	acyl-CoA thioesterase 6 [Source:HGNC Symbol;Acc:HGNC:33159]	protein_coding	14:73610945-73619888:1	1	3	1	40	7	7	10	7	4	0	80	0.132	0.247	0.04	0.034	1.213	0.256	0.104	0.087	0.087	0.029	0	0.00455	0.0006	0.00034	0.01565	0.00257	0.00094	0.00047	0.00077	0.00035	0	0	.	.	.	.	.	.	.	.	.	no	no	no
ACOT7	ENSG00000097021	acyl-CoA thioesterase 7 [Source:HGNC Symbol;Acc:HGNC:24157]	protein_coding	1:6264269-6393767:-1	26	353	282	1064	777	2492	3803	2470	4939	192	16398	27.137	6.42	4.758	9.514	32.262	28.462	37.116	32.964	30.752	35.271	5.774	0.15685	0.09053	0.13146	0.70092	0.58202	0.43826	0.36452	0.34145	0.51758	0.09428	1	Cluster 6 (undiff SPG)	0.323	0.268	0.055	0.055	0.33	1.88e-150	9.49e-146	undiff SPG	no	no	no
ACOT8	ENSG00000101473	acyl-CoA thioesterase 8 [Source:HGNC Symbol;Acc:HGNC:15919]	protein_coding	20:45841721-45857405:-1	50	360	181	310	247	2190	2940	1115	1859	399	9651	15.971	12.346	4.852	6.107	9.4	9.048	32.618	25.483	13.882	13.276	12	0.33687	0.09664	0.08079	0.1394	0.15429	0.36681	0.2751	0.13328	0.1472	0.21687	0	.	.	.	.	.	.	.	.	.	no	no	no
ACOT9	ENSG00000123130	acyl-CoA thioesterase 9 [Source:HGNC Symbol;Acc:HGNC:17152]	protein_coding	X:23701055-23766475:-1	39	1253	786	736	356	395	651	277	122	13	4628	7.659	9.63	16.889	26.518	22.317	13.04	5.883	5.643	3.449	0.871	0.391	0.2524	0.40305	0.46356	0.35446	0.21059	0.04114	0.05236	0.04198	0.0101	0.00566	1	Cluster 7 (endothelia/macrophage)	0.265	0.067	0.198	0.198	0.401	3.19e-229	1.61e-224	endothelia/macrophage	no	no	yes
ACOX1	ENSG00000161533	acyl-CoA oxidase 1 [Source:HGNC Symbol;Acc:HGNC:119]	protein_coding	17:75941507-75979177:-1	81	1252	401	381	403	1319	1597	1067	632	55	7188	11.895	20	16.876	13.529	11.552	14.762	19.646	13.842	13.284	4.513	1.654	0.62381	0.42593	0.20897	0.19123	0.31723	0.17157	0.1349	0.1436	0.05457	0.02751	0	.	.	.	.	.	.	.	.	.	no	no	no
ACOX2	ENSG00000168306	acyl-CoA oxidase 2 [Source:HGNC Symbol;Acc:HGNC:120]	protein_coding	3:58505136-58537283:-1	17	530	97	97	13	9	22	25	62	6	878	1.453	4.198	7.144	3.273	2.941	0.476	0.134	0.191	0.311	0.443	0.18	0.11717	0.15635	0.04573	0.03949	0.007	0.00305	0.0014	0.0026	0.00398	0.00306	0	.	.	.	.	.	.	.	.	.	no	no	no
ACOX3	ENSG00000087008	acyl-CoA oxidase 3, pristanoyl [Source:HGNC Symbol;Acc:HGNC:121]	protein_coding	4:8366282-8440723:-1	8	441	177	160	124	180	895	157	120	26	2288	3.786	1.975	5.944	5.972	4.851	4.542	2.681	7.758	1.955	0.857	0.782	0.07063	0.12427	0.0812	0.07098	0.07764	0.02065	0.06948	0.01793	0.01171	0.01055	0	.	.	.	.	.	.	.	.	.	no	no	no
ACOXL	ENSG00000153093	acyl-CoA oxidase like [Source:HGNC Symbol;Acc:HGNC:25621]	protein_coding	2:110732539-111120610:1	7	240	102	705	292	1486	2643	1923	1682	239	9319	15.422	1.728	3.235	3.441	21.377	10.696	22.133	22.909	23.942	12.012	7.188	0.05063	0.06851	0.04987	0.34719	0.19795	0.19957	0.23523	0.32974	0.13513	0.14056	0	.	.	.	.	.	.	.	.	.	no	no	no
ACOXL-AS1	ENSG00000204581	ACOXL antisense RNA 1 [Source:HGNC Symbol;Acc:HGNC:41112]	lncRNA	2:111098345-111116407:-1	1	16	7	31	25	194	617	312	302	72	1577	2.61	0.247	0.216	0.236	0.94	0.916	2.889	5.348	3.884	2.157	2.165	0.00059	0.00433	0.00271	0.01576	0.01977	0.02671	0.04552	0.04476	0.02342	0.04102	0	.	.	.	.	.	.	.	.	.	no	no	no
ACP1	ENSG00000143727	acid phosphatase 1 [Source:HGNC Symbol;Acc:HGNC:122]	protein_coding	2:264140-278283:1	222	2937	1215	2483	2039	4385	8309	6768	12750	2532	43640	72.219	54.815	39.588	40.992	75.288	74.689	65.311	72.02	84.263	91.052	76.15	2.72411	1.15118	0.90089	2.87216	3.20361	1.35941	2.06007	5.45565	7.06044	3.88396	2	Cluster 2 (early spermatid 2) | Cluster 0 (late spermatid 1)	0.843 | 0.911	0.704 | 0.665	0.139 | 0.246	0.246	0.572 | 1.168	0.000e+00 | 0.000e+00	0.000e+00 | 0.000e+00	.	no	no	no
ACP2	ENSG00000134575	acid phosphatase 2, lysosomal [Source:HGNC Symbol;Acc:HGNC:123]	protein_coding	11:47239302-47248906:-1	29	447	302	69	384	1162	449	92	131	19	3084	5.104	7.16	6.025	10.189	2.092	14.066	17.307	3.892	1.145	0.936	0.571	0.16168	0.12969	0.13786	0.02735	0.26005	0.15583	0.03977	0.00956	0.0123	0.01175	0	.	.	.	.	.	.	.	.	.	no	no	no
ACP3	ENSG00000014257	acid phosphatase 3 [Source:HGNC Symbol;Acc:HGNC:125]	protein_coding	3:132317369-132368298:1	8	39	24	35	17	40	76	72	15	0	326	0.539	1.975	0.526	0.81	1.061	0.623	0.596	0.659	0.896	0.107	0	0.05157	0.01342	0.0144	0.01223	0.0102	0.00352	0.00592	0.01196	0.0016	0	0	.	.	.	.	.	.	.	.	.	no	no	no
ACP4	ENSG00000142513	acid phosphatase 4 [Source:HGNC Symbol;Acc:HGNC:14376]	protein_coding	19:50790415-50795219:1	12	86	34	48	62	222	911	2732	5796	1570	11473	18.987	2.963	1.159	1.147	1.455	2.271	3.307	7.896	34.014	41.391	47.218	0.08825	0.02475	0.01485	0.03077	0.04828	0.04539	0.09329	0.42793	0.68163	1.31733	1	Cluster 0 (late spermatid 1) | Cluster 5 (late spermatid 2)	0.414 | 0.472	0.122 | 0.173	0.292 | 0.299	0.299	0.476 | 0.879	0.000e+00 | 0.000e+00	0.000e+00 | 0.000e+00	late spermatid	no	no	no
ACP5	ENSG00000102575	acid phosphatase 5, tartrate resistant [Source:HGNC Symbol;Acc:HGNC:124]	protein_coding	19:11574660-11579008:-1	0	1014	50	38	16	31	58	9	19	6	1241	2.054	0	13.668	1.687	1.152	0.586	0.462	0.503	0.112	0.136	0.18	0	0.36152	0.04179	0.01441	0.0082	0.00377	0.00415	0.00091	0.00189	0.00463	0	.	.	.	.	.	.	.	.	.	no	no	no
ACP6	ENSG00000162836	acid phosphatase 6, lysophosphatidic [Source:HGNC Symbol;Acc:HGNC:29609]	protein_coding	1:147629652-147670524:-1	10	282	93	431	298	656	748	414	180	11	3123	5.168	2.469	3.801	3.138	13.069	10.916	9.771	6.483	5.154	1.285	0.331	0.05626	0.07877	0.04567	0.19133	0.18787	0.08862	0.05704	0.0534	0.01653	0.00637	0	.	.	.	.	.	.	.	.	.	no	no	no
ACP7	ENSG00000183760	acid phosphatase 7, tartrate resistant (putative) [Source:HGNC Symbol;Acc:HGNC:33781]	protein_coding	19:39083913-39111493:1	2	57	46	48	30	73	95	67	12	1	431	0.713	0.494	0.768	1.552	1.455	1.099	1.087	0.823	0.834	0.086	0.03	0.01486	0.01746	0.02065	0.01508	0.01477	0.00783	0.00588	0.00966	0.00097	0.00097	0	.	.	.	.	.	.	.	.	.	no	no	no
ACR	ENSG00000100312	acrosin [Source:HGNC Symbol;Acc:HGNC:126]	protein_coding	22:50738196-50745339:1	24	104	101	130	167	4652	8766	4862	3486	176	22468	37.182	5.926	1.402	3.408	3.942	6.117	69.288	75.982	60.533	24.895	5.293	0.1984	0.03324	0.05148	0.08731	0.12729	2.10691	2.40802	1.70397	0.38213	0.09721	2	Cluster 4 (spermatocyte) | Cluster 1 (early spermatid 1) | Cluster 2 (early spermatid 2)	0.693 | 0.76 | 0.605	0.332 | 0.28 | 0.336	0.361 | 0.480 | 0.269	0.48	0.711 | 0.997 | 0.487	0.000e+00 | 0.000e+00 | 0.000e+00	0.000e+00 | 0.000e+00 | 0.000e+00	.	no	no	no
ACRBP	ENSG00000111644	acrosin binding protein [Source:HGNC Symbol;Acc:HGNC:17195]	protein_coding	12:6638075-6647433:-1	105	461	205	544	720	6210	11082	7133	10845	1418	38723	64.082	25.926	6.214	6.916	16.495	26.374	92.493	96.056	88.807	77.448	42.647	1.01571	0.18752	0.15585	0.42278	0.78098	9.70794	9.32014	6.80327	2.86341	1.16526	2	Cluster 4 (spermatocyte) | Cluster 1 (early spermatid 1) | Cluster 2 (early spermatid 2)	0.925 | 0.961 | 0.888	0.605 | 0.565 | 0.603	0.320 | 0.396 | 0.285	0.396	1.114 | 1.208 | 0.573	0.000e+00 | 0.000e+00 | 0.000e+00	0.000e+00 | 0.000e+00 | 0.000e+00	.	no	no	no
ACRP1	ENSG00000175509	ACR pseudogene 1 [Source:HGNC Symbol;Acc:HGNC:54745]	processed_pseudogene	2:113667478-113668621:-1	0	0	0	2	2	30	30	10	3	0	77	0.127	0	0	0	0.061	0.073	0.447	0.26	0.125	0.021	0	0	0	0	0.00049	0.0002	0.00344	0.00175	0.00129	0.00015	0	0	.	.	.	.	.	.	.	.	.	no	no	no
ACRV1	ENSG00000134940	acrosomal vesicle protein 1 [Source:HGNC Symbol;Acc:HGNC:127]	protein_coding	11:125671522-125680874:-1	58	274	101	256	361	1491	9663	6481	4069	552	23306	38.569	14.321	3.693	3.408	7.762	13.223	22.207	83.757	80.69	29.058	16.602	0.50697	0.10201	0.06959	0.16708	0.33949	0.36988	4.68522	5.92003	0.64455	0.37595	1	Cluster 1 (early spermatid 1) | Cluster 2 (early spermatid 2)	0.838 | 0.807	0.279 | 0.321	0.559 | 0.486	0.559	1.313 | 1.573	0.000e+00 | 0.000e+00	0.000e+00 | 0.000e+00	early spermatid	no	no	no
ACSBG1	ENSG00000103740	acyl-CoA synthetase bubblegum family member 1 [Source:HGNC Symbol;Acc:HGNC:29567]	protein_coding	15:78167468-78245688:-1	1	158	113	139	134	326	537	236	291	35	1970	3.26	0.247	2.13	3.812	4.215	4.908	4.856	4.655	2.938	2.078	1.053	0.0061	0.0503	0.06163	0.06267	0.0658	0.03502	0.03878	0.02933	0.02203	0.01771	0	.	.	.	.	.	.	.	.	.	no	no	no
ACSBG2	ENSG00000130377	acyl-CoA synthetase bubblegum family member 2 [Source:HGNC Symbol;Acc:HGNC:24174]	protein_coding	19:6135247-6193094:1	98	359	160	314	339	1307	7786	5827	12310	3246	31746	52.536	24.198	4.839	5.398	9.521	12.418	19.467	67.487	72.547	87.91	97.624	1.1816	0.14634	0.12764	0.23226	0.29831	0.30251	1.83569	2.77584	5.20353	11.7144	1	Cluster 0 (late spermatid 1) | Cluster 5 (late spermatid 2)	0.879 | 0.976	0.419 | 0.499	0.460 | 0.477	0.477	1.099 | 2.020	0.000e+00 | 0.000e+00	0.000e+00 | 0.000e+00	late spermatid	no	no	no
ACSF2	ENSG00000167107	acyl-CoA synthetase family member 2 [Source:HGNC Symbol;Acc:HGNC:26101]	protein_coding	17:50426158-50474845:1	29	563	178	86	50	33	59	56	59	6	1119	1.852	7.16	7.589	6.005	2.608	1.832	0.492	0.511	0.697	0.421	0.18	0.2308	0.16867	0.08923	0.03566	0.02708	0.00495	0.00459	0.00778	0.00592	0.00355	0	.	.	.	.	.	.	.	.	.	no	no	no
ACSF3	ENSG00000176715	acyl-CoA synthetase family member 3 [Source:HGNC Symbol;Acc:HGNC:27288]	protein_coding	16:89088375-89164121:1	49	792	548	521	459	428	847	1654	1447	202	6947	11.497	12.099	10.675	18.489	15.797	16.813	6.375	7.342	20.593	10.333	6.075	0.29122	0.25073	0.33474	0.23858	0.31153	0.05706	0.06865	0.25525	0.11893	0.10923	0	.	.	.	.	.	.	.	.	.	no	no	no
ACSL1	ENSG00000151726	acyl-CoA synthetase long chain family member 1 [Source:HGNC Symbol;Acc:HGNC:3569]	protein_coding	4:184755595-184826818:-1	44	625	247	603	474	880	3524	5768	8505	1429	22099	36.571	10.864	8.424	8.333	18.284	17.363	13.107	30.545	71.813	60.737	42.977	0.34979	0.18459	0.16237	0.32011	0.33431	0.15143	0.43546	2.37576	1.4486	1.04042	2	Cluster 2 (early spermatid 2) | Cluster 0 (late spermatid 1)	0.718 | 0.607	0.312 | 0.293	0.406 | 0.314	0.406	1.038 | 0.526	0.000e+00 | 0.000e+00	0.000e+00 | 0.000e+00	.	no	no	no
ACSL3	ENSG00000123983	acyl-CoA synthetase long chain family member 3 [Source:HGNC Symbol;Acc:HGNC:3570]	protein_coding	2:222860942-222944639:1	94	1410	617	1062	1038	2786	6184	1579	1011	123	15904	26.319	23.21	19.005	20.816	32.201	38.022	41.495	53.601	19.659	7.22	3.699	0.88596	0.46784	0.35527	0.61459	0.8885	0.51419	0.90222	0.26892	0.10842	0.07681	2	Cluster 8 (diff SPG/early meiosis) | Cluster 1 (early spermatid 1)	0.38 | 0.536	0.258 | 0.199	0.122 | 0.337	0.337	0.403 | 0.503	2.115e-107 | 0.000e+00	1.070e-102 | 0.000e+00	.	no	no	no
ACSL3-AS1	ENSG00000234193	ACSL3 antisense RNA 1 [Source:HGNC Symbol;Acc:HGNC:40227]	lncRNA	2:222917387-222919363:-1	0	1	0	0	0	10	220	8	3	2	244	0.404	0	0.013	0	0	0	0.149	1.907	0.1	0.021	0.06	0	5e-05	0	0	0	0.00095	0.01313	0.00041	0.00055	0.0011	0	.	.	.	.	.	.	.	.	.	no	no	no
ACSL4	ENSG00000068366	acyl-CoA synthetase long chain family member 4 [Source:HGNC Symbol;Acc:HGNC:3571]	protein_coding	X:109624244-109733403:-1	166	370	533	479	133	81	118	82	232	46	2240	3.707	40.988	4.987	17.982	14.524	4.872	1.206	1.023	1.021	1.657	1.383	2.08858	0.10178	0.28712	0.27836	0.08943	0.01558	0.01134	0.01492	0.02979	0.0304	1	Cluster 9 (Sertoli)	0.41	0.035	0.375	0.375	1.542	5.3e-207	2.68e-202	Sertoli	yes	no	no
ACSL5	ENSG00000197142	acyl-CoA synthetase long chain family member 5 [Source:HGNC Symbol;Acc:HGNC:16526]	protein_coding	10:112374116-112428379:1	7	501	463	201	90	763	6340	3002	2687	57	14111	23.352	1.728	6.753	15.621	6.095	3.297	11.364	54.954	37.375	19.189	1.714	0.05641	0.15841	0.22363	0.1068	0.05645	0.12547	0.94169	0.47927	0.24732	0.03523	1	Cluster 1 (early spermatid 1)	0.55	0.159	0.391	0.391	0.673	0	0	early spermatid	no	no	no
ACSL6	ENSG00000164398	acyl-CoA synthetase long chain family member 6 [Source:HGNC Symbol;Acc:HGNC:16496]	protein_coding	5:131949973-132012243:-1	21	198	140	228	155	3746	5171	1150	379	37	11225	18.576	5.185	2.669	4.723	6.913	5.678	55.794	44.821	14.318	2.707	1.113	0.15911	0.05836	0.06936	0.10673	0.09108	0.97415	0.61006	0.15799	0.04725	0.02258	2	Cluster 4 (spermatocyte) | Cluster 1 (early spermatid 1)	0.558 | 0.448	0.139 | 0.124	0.419 | 0.324	0.419	0.727 | 0.422	0.000e+00 | 0.000e+00	0.000e+00 | 0.000e+00	.	no	no	no
ACSL6-AS1	ENSG00000223548	ACSL6 antisense RNA 1 [Source:HGNC Symbol;Acc:HGNC:40772]	lncRNA	5:132003592-132007022:1	7	0	1	2	1	0	2	2	2	0	17	0.028	1.728	0	0.034	0.061	0.037	0	0.017	0.025	0.014	0	0.0549	0	0.00056	0.00035	0.00057	0	9e-05	0.0001	0.00013	0	0	.	.	.	.	.	.	.	.	.	no	no	no
ACSM1	ENSG00000166743	acyl-CoA synthetase medium chain family member 1 [Source:HGNC Symbol;Acc:HGNC:18049]	protein_coding	16:20623235-20698890:-1	8	254	81	78	29	171	740	1099	1104	222	3786	6.265	1.975	3.424	2.733	2.365	1.062	2.547	6.414	13.683	7.884	6.677	0.05381	0.07087	0.04006	0.02932	0.01352	0.02237	0.05167	0.13162	0.08505	0.11034	0	.	.	.	.	.	.	.	.	.	no	no	no
ACSM2A	ENSG00000183747	acyl-CoA synthetase medium chain family member 2A [Source:HGNC Symbol;Acc:HGNC:32017]	protein_coding	16:20451461-20487669:1	0	62	96	89	43	69	133	155	30	3	680	1.125	0	0.836	3.239	2.699	1.575	1.028	1.153	1.93	0.214	0.09	0	0.0191	0.0469	0.03955	0.02746	0.0078	0.00813	0.02468	0.00243	0.0005	0	.	.	.	.	.	.	.	.	.	no	no	no
ACSM2B	ENSG00000066813	acyl-CoA synthetase medium chain family member 2B [Source:HGNC Symbol;Acc:HGNC:30931]	protein_coding	16:20536226-20576427:-1	0	34	101	65	18	60	216	73	42	2	611	1.011	0	0.458	3.408	1.971	0.659	0.894	1.872	0.909	0.3	0.06	0	0.00899	0.04616	0.02728	0.00778	0.00742	0.01357	0.00994	0.00262	0.00136	0	.	.	.	.	.	.	.	.	.	no	no	no
ACSM3	ENSG00000005187	acyl-CoA synthetase medium chain family member 3 [Source:HGNC Symbol;Acc:HGNC:10522]	protein_coding	16:20610243-20797581:1	48	514	248	249	132	402	3192	947	480	33	6245	10.335	11.852	6.928	8.367	7.55	4.835	5.987	27.668	11.79	3.428	0.992	0.34492	0.15699	0.12569	0.11319	0.08785	0.04957	0.30165	0.14045	0.03934	0.01855	1	Cluster 1 (early spermatid 1)	0.277	0.062	0.215	0.215	0.257	0	0	early spermatid	no	no	no
ACSM4	ENSG00000215009	acyl-CoA synthetase medium chain family member 4 [Source:HGNC Symbol;Acc:HGNC:32016]	protein_coding	12:7304284-7328724:1	0	9	1	350	21	135	484	206	186	10	1402	2.32	0	0.121	0.034	10.612	0.769	2.011	4.195	2.565	1.328	0.301	0	0.00248	7e-05	0.16352	0.01033	0.0155	0.03994	0.02005	0.01261	0.00464	0	.	.	.	.	.	.	.	.	.	no	no	no
ACSM5	ENSG00000183549	acyl-CoA synthetase medium chain family member 5 [Source:HGNC Symbol;Acc:HGNC:26060]	protein_coding	16:20409534-20441336:1	3	138	22	40	10	51	88	42	43	11	448	0.741	0.741	1.86	0.742	1.213	0.366	0.76	0.763	0.523	0.307	0.331	0.02466	0.04284	0.01609	0.01444	0.00618	0.00392	0.00573	0.00722	0.00384	0.00569	0	.	.	.	.	.	.	.	.	.	no	no	no
ACSM5P1	ENSG00000260762	acyl-CoA synthetase medium chain family member 5 pseudogene 1 [Source:HGNC Symbol;Acc:HGNC:51295]	unprocessed_pseudogene	16:20586550-20607107:-1	0	0	4	1	0	5	9	4	2	0	25	0.041	0	0	0.135	0.03	0	0.074	0.078	0.05	0.014	0	0	0	0.0018	0.00037	0	0.00029	0.00052	0.00015	0.00032	0	0	.	.	.	.	.	.	.	.	.	no	no	no
ACSM6	ENSG00000173124	acyl-CoA synthetase medium chain family member 6 [Source:HGNC Symbol;Acc:HGNC:31665]	protein_coding	10:95194200-95228928:1	2	45	19	50	41	106	1035	692	401	14	2405	3.98	0.494	0.607	0.641	1.516	1.502	1.579	8.971	8.616	2.864	0.421	0.01071	0.01211	0.01133	0.02358	0.02182	0.01327	0.06954	0.07697	0.02611	0.0056	0	.	.	.	.	.	.	.	.	.	no	no	no
ACSS1	ENSG00000154930	acyl-CoA synthetase short chain family member 1 [Source:HGNC Symbol;Acc:HGNC:16091]	protein_coding	20:25006230-25058980:-1	134	910	249	139	102	245	740	3817	3115	120	9571	15.839	33.086	12.266	8.401	4.215	3.736	3.649	6.414	47.522	22.245	3.609	1.12503	0.29539	0.12895	0.06888	0.06991	0.03897	0.07027	1.05603	0.33051	0.06916	2	Cluster 9 (Sertoli) | Cluster 2 (early spermatid 2)	0.331 | 0.475	0.157 | 0.11	0.174 | 0.365	0.365	0.720 | 0.802	1.018e-44 | 0.000e+00	5.150e-40 | 0.000e+00	.	yes	no	no
ACSS2	ENSG00000131069	acyl-CoA synthetase short chain family member 2 [Source:HGNC Symbol;Acc:HGNC:15814]	protein_coding	20:34872146-34927962:1	21	323	341	333	506	824	837	335	318	18	3856	6.381	5.185	4.354	11.505	10.097	18.535	12.273	7.255	4.171	2.271	0.541	0.12187	0.0871	0.16335	0.1414	0.43617	0.10209	0.06598	0.04345	0.02521	0.01245	0	.	.	.	.	.	.	.	.	.	no	no	no
ACSS3	ENSG00000111058	acyl-CoA synthetase short chain family member 3 [Source:HGNC Symbol;Acc:HGNC:24723]	protein_coding	12:80936414-81261210:1	11	716	51	139	95	1291	5198	1779	503	41	9824	16.258	2.716	9.651	1.721	4.215	3.48	19.228	45.055	22.149	3.592	1.233	0.08366	0.21588	0.02252	0.06057	0.06867	0.18043	0.6766	0.24008	0.05426	0.0242	1	Cluster 1 (early spermatid 1)	0.451	0.095	0.356	0.356	0.577	0	0	early spermatid	no	no	no
ACTA1	ENSG00000143632	actin alpha 1, skeletal muscle [Source:HGNC Symbol;Acc:HGNC:129]	protein_coding	1:229430365-229434104:-1	0	16	10	15	16	98	171	54	55	1	436	0.722	0	0.216	0.337	0.455	0.586	1.46	1.482	0.672	0.393	0.03	0	0.00891	0.00495	0.00699	0.00995	0.01839	0.02059	0.00759	0.00426	0.00055	0	.	.	.	.	.	.	.	.	.	no	no	no
ACTA2	ENSG00000107796	actin alpha 2, smooth muscle [Source:HGNC Symbol;Acc:HGNC:130]	protein_coding	10:88935074-88991339:-1	19	4820	202	451	230	399	729	538	474	78	7940	13.14	4.691	64.968	6.815	13.675	8.425	5.943	6.319	6.698	3.385	2.346	0.94772	19.1711	0.2371	0.26032	0.37832	0.13392	0.14121	0.10838	0.08593	0.09465	1	Cluster 3 (myoid/Leydig)	0.65	0.059	0.591	0.591	4.134	0	0	myoid/Leydig	no	yes	no
ACTA2-AS1	ENSG00000180139	ACTA2 antisense RNA 1 [Source:HGNC Symbol;Acc:HGNC:45169]	lncRNA	10:88932390-88940820:1	6	300	11	8	20	65	146	1581	1812	147	4096	6.778	1.481	4.044	0.371	0.243	0.733	0.968	1.265	19.684	12.94	4.421	0.03718	0.08657	0.00355	0.00223	0.01087	0.01266	0.00953	0.22016	0.14505	0.07798	0	.	.	.	.	.	.	.	.	.	no	no	no
ACTB	ENSG00000075624	actin beta [Source:HGNC Symbol;Acc:HGNC:132]	protein_coding	7:5526409-5563902:-1	400	7307	2947	2752	2342	3473	5525	3168	4777	715	33406	55.283	98.765	98.49	99.426	83.445	85.788	51.728	47.889	39.442	34.114	21.504	28.484	28.0558	32.0748	4.93265	9.03877	1.01919	0.88872	0.73279	0.83444	0.70226	4	Cluster 9 (Sertoli) | Cluster 3 (myoid/Leydig) | Cluster 7 (endothelia/macrophage) | Cluster 8 (diff SPG/early meiosis)	0.988 | 0.985 | 0.994 | 0.858	0.55 | 0.492 | 0.53 | 0.538	0.438 | 0.493 | 0.464 | 0.320	0.493	2.004 | 2.697 | 2.420 | 0.444	2.012e-216 | 0.000e+00 | 0.000e+00 | 0.000e+00	1.018e-211 | 0.000e+00 | 0.000e+00 | 0.000e+00	.	yes	yes	yes
ACTBL2	ENSG00000169067	actin beta like 2 [Source:HGNC Symbol;Acc:HGNC:17780]	protein_coding	5:57480018-57482811:-1	0	3	2	0	3	2	64	255	50	2	381	0.631	0	0.04	0.067	0	0.11	0.03	0.555	3.175	0.357	0.06	0	0.00086	0.00033	0	0.00279	0.00028	0.00404	0.02799	0.0039	0.00117	0	.	.	.	.	.	.	.	.	.	no	no	no
ACTBP1	ENSG00000229145	ACTB pseudogene 1 [Source:HGNC Symbol;Acc:HGNC:134]	processed_pseudogene	X:46288016-46289128:-1	0	2	0	1	0	0	0	0	0	0	3	0.005	0	0.027	0	0.03	0	0	0	0	0	0	0	0.00035	0	0.00058	0	0	0	0	0	0	0	.	.	.	.	.	.	.	.	.	no	no	no
ACTBP11	ENSG00000188460	ACTB pseudogene 11 [Source:HGNC Symbol;Acc:HGNC:33971]	processed_pseudogene	1:223863726-223864851:-1	0	2	0	0	0	0	0	0	0	0	2	0.003	0	0.027	0	0	0	0	0	0	0	0	0	0.00062	0	0	0	0	0	0	0	0	0	.	.	.	.	.	.	.	.	.	no	no	no
ACTBP12	ENSG00000233125	ACTB pseudogene 12 [Source:HGNC Symbol;Acc:HGNC:150]	processed_pseudogene	1:92229018-92229435:-1	0	5	0	2	1	0	0	0	1	0	9	0.015	0	0.067	0	0.061	0.037	0	0	0	0.007	0	0	0.00158	0	0.00038	0.0003	0	0	0	9e-05	0	0	.	.	.	.	.	.	.	.	.	no	no	no
ACTBP14	ENSG00000229001	ACTB pseudogene 14 [Source:HGNC Symbol;Acc:HGNC:45086]	processed_pseudogene	10:69022778-69023866:1	0	1	0	1	0	6	16	21	8	4	57	0.094	0	0.013	0	0.03	0	0.089	0.139	0.261	0.057	0.12	0	0.00012	0	0.0005	0	0.00077	0.00101	0.00236	0.00052	0.00185	0	.	.	.	.	.	.	.	.	.	no	no	no
ACTBP15	ENSG00000213857	ACTB pseudogene 15 [Source:HGNC Symbol;Acc:HGNC:55065]	processed_pseudogene	22:41074180-41075239:-1	0	0	0	0	1	1	0	2	1	1	6	0.01	0	0	0	0	0.037	0.015	0	0.025	0.007	0.03	0	0	0	0	0.00015	0.00019	0	0.00015	5e-05	0.00044	0	.	.	.	.	.	.	.	.	.	no	no	no
ACTBP2	ENSG00000213763	ACTB pseudogene 2 [Source:HGNC Symbol;Acc:HGNC:135]	processed_pseudogene	5:77784881-77786003:1	0	0	1	3	0	3	3	1	1	0	12	0.02	0	0	0.034	0.091	0	0.045	0.026	0.012	0.007	0	0	0	7e-05	0.00092	0	0.00029	0.00033	4e-05	2e-05	0	0	.	.	.	.	.	.	.	.	.	no	no	no
ACTBP4	ENSG00000286676	ACTB pseudogene 4 [Source:HGNC Symbol;Acc:HGNC:137]	processed_pseudogene	5:131659046-131660115:-1	0	1	1	0	1	3	2	2	6	1	17	0.028	0	0.013	0.034	0	0.037	0.045	0.017	0.025	0.043	0.03	0	0.00023	0.00082	0	0.00019	0.00013	0.00026	9e-05	0.00032	0.00108	0	.	.	.	.	.	.	.	.	.	no	no	no
ACTBP7	ENSG00000185607	ACTB pseudogene 7 [Source:HGNC Symbol;Acc:HGNC:140]	processed_pseudogene	15:43989061-43990184:-1	0	0	1	1	2	3	12	25	37	8	89	0.147	0	0	0.034	0.03	0.073	0.045	0.104	0.311	0.264	0.241	0	0	0.00039	0.00109	0.0012	0.00022	0.00067	0.00323	0.00245	0.0051	0	.	.	.	.	.	.	.	.	.	no	no	no
ACTBP8	ENSG00000220267	ACTB pseudogene 8 [Source:HGNC Symbol;Acc:HGNC:141]	processed_pseudogene	6:88275882-88276989:-1	0	1	0	0	0	4	28	25	104	12	174	0.288	0	0.013	0	0	0	0.06	0.243	0.311	0.743	0.361	0	7e-05	0	0	0	0.00107	0.00192	0.00228	0.00747	0.0067	0	.	.	.	.	.	.	.	.	.	no	no	no
ACTC1	ENSG00000159251	actin alpha cardiac muscle 1 [Source:HGNC Symbol;Acc:HGNC:143]	protein_coding	15:34790230-34795549:-1	2	8	2	34	5	97	176	86	82	5	497	0.822	0.494	0.108	0.067	1.031	0.183	1.445	1.526	1.071	0.586	0.15	0.00137	0.00931	0.00049	0.0128	0.00321	0.00995	0.01317	0.00668	0.00545	0.00166	0	.	.	.	.	.	.	.	.	.	no	no	no
ACTE1P	ENSG00000172900	actin epsilon 1, pseudogene [Source:HGNC Symbol;Acc:HGNC:51491]	transcribed_unitary_pseudogene	11:71382601-71423423:-1	2	49	45	94	45	108	238	754	842	125	2302	3.81	0.494	0.66	1.518	2.85	1.648	1.609	2.063	9.387	6.013	3.759	0.01784	0.01522	0.02281	0.04202	0.02718	0.01423	0.01872	0.08616	0.05981	0.06665	0	.	.	.	.	.	.	.	.	.	no	no	no
ACTG1	ENSG00000184009	actin gamma 1 [Source:HGNC Symbol;Acc:HGNC:144]	protein_coding	17:81509413-81523847:-1	251	7130	2892	3150	2419	6412	9065	4646	6595	827	43387	71.801	61.975	96.105	97.571	95.512	88.608	95.502	78.573	57.844	47.097	24.872	4.69056	14.989	15.7813	14.8139	15.1666	10.0455	3.05054	1.22703	1.11927	0.65406	5	Cluster 3 (myoid/Leydig) | Cluster 7 (endothelia/macrophage) | Cluster 6 (undiff SPG) | Cluster 8 (diff SPG/early meiosis) | Cluster 4 (spermatocyte)	0.961 | 0.976 | 0.955 | 0.886 | 0.955	0.684 | 0.705 | 0.704 | 0.71 | 0.688	0.277 | 0.271 | 0.251 | 0.176 | 0.267	0.277	1.395 | 1.302 | 1.217 | 1.233 | 0.694	0.000e+00 | 0.000e+00 | 0.000e+00 | 0.000e+00 | 0.000e+00	0.000e+00 | 0.000e+00 | 0.000e+00 | 0.000e+00 | 0.000e+00	.	no	yes	yes
ACTG1P1	ENSG00000178631	actin gamma 1 pseudogene 1 [Source:HGNC Symbol;Acc:HGNC:146]	processed_pseudogene	3:139493809-139494937:1	0	0	0	0	0	4	5	3	3	1	16	0.026	0	0	0	0	0	0.06	0.043	0.037	0.021	0.03	0	0	0	0	0	0.00058	0.00033	0.00038	0.0001	0.0003	0	.	.	.	.	.	.	.	.	.	no	no	no
ACTG1P10	ENSG00000231340	actin gamma 1 pseudogene 10 [Source:HGNC Symbol;Acc:HGNC:155]	processed_pseudogene	X:53142832-53143913:-1	0	19	21	4	4	0	1	1	2	0	52	0.086	0	0.256	0.709	0.121	0.147	0	0.009	0.012	0.014	0	0	0.00507	0.00999	0.00198	0.00289	0	4e-05	0.00043	0.00053	0	0	.	.	.	.	.	.	.	.	.	no	no	no
ACTG1P12	ENSG00000226642	actin gamma 1 pseudogene 12 [Source:HGNC Symbol;Acc:HGNC:44496]	processed_pseudogene	3:12070195-12071360:1	0	0	0	10	9	10	6	10	2	0	47	0.078	0	0	0	0.303	0.33	0.149	0.052	0.125	0.014	0	0	0	0	0.00356	0.00684	0.00079	0.00022	0.00122	0.00027	0	0	.	.	.	.	.	.	.	.	.	no	no	no
ACTG1P13	ENSG00000241305	actin gamma 1 pseudogene 13 [Source:HGNC Symbol;Acc:HGNC:49058]	processed_pseudogene	3:99215224-99216266:-1	0	0	0	0	0	0	2	14	2	1	19	0.031	0	0	0	0	0	0	0.017	0.174	0.014	0.03	0	0	0	0	0	0	0.0001	0.00244	9e-05	0.00084	0	.	.	.	.	.	.	.	.	.	no	no	no
ACTG1P14	ENSG00000230581	actin gamma 1 pseudogene 14 [Source:HGNC Symbol;Acc:HGNC:49751]	processed_pseudogene	9:6834456-6835577:1	0	2	1	6	4	8	3	1	4	0	29	0.048	0	0.027	0.034	0.182	0.147	0.119	0.026	0.012	0.029	0	0	0.00078	0.00036	0.00216	0.00264	0.00114	0.00049	0.00037	0.00014	0	0	.	.	.	.	.	.	.	.	.	no	no	no
ACTG1P15	ENSG00000259904	actin gamma 1 pseudogene 15 [Source:HGNC Symbol;Acc:HGNC:51495]	processed_pseudogene	15:34373541-34374603:-1	0	0	0	0	0	1	14	17	26	6	64	0.106	0	0	0	0	0	0.015	0.121	0.212	0.186	0.18	0	0	0	0	0	6e-05	0.00061	0.00249	0.00196	0.00428	0	.	.	.	.	.	.	.	.	.	no	no	no
ACTG1P17	ENSG00000259315	actin gamma 1 pseudogene 17 [Source:HGNC Symbol;Acc:HGNC:51497]	transcribed_processed_pseudogene	15:82725873-82738904:-1	1	57	27	56	41	183	155	585	340	12	1457	2.411	0.247	0.768	0.911	1.698	1.502	2.726	1.344	7.283	2.428	0.361	0.00499	0.01684	0.01553	0.02319	0.02029	0.02143	0.01167	0.09252	0.03181	0.007	0	.	.	.	.	.	.	.	.	.	no	no	no
ACTG1P18	ENSG00000218475	actin gamma 1 pseudogene 18 [Source:HGNC Symbol;Acc:HGNC:51498]	processed_pseudogene	6:101430411-101431553:-1	0	0	0	0	0	0	0	0	0	0	0	0	0	0	0	0	0	0	0	0	0	0	0	0	0	0	0	0	0	0	0	0	0	.	.	.	.	.	.	.	.	.	no	no	no
ACTG1P19	ENSG00000237999	actin gamma 1 pseudogene 19 [Source:HGNC Symbol;Acc:HGNC:51499]	processed_pseudogene	9:100731240-100732355:1	0	0	0	0	0	0	0	4	2	1	7	0.012	0	0	0	0	0	0	0	0.05	0.014	0.03	0	0	0	0	0	0	0	0.00047	6e-05	0.00092	0	.	.	.	.	.	.	.	.	.	no	no	no
ACTG1P20	ENSG00000241547	actin gamma 1 pseudogene 20 [Source:HGNC Symbol;Acc:HGNC:51500]	processed_pseudogene	1:27325329-27325796:1	0	0	1	0	1	0	0	1	0	0	3	0.005	0	0	0.034	0	0.037	0	0	0.012	0	0	0	0	0.00028	0	0.00073	0	0	3e-05	0	0	0	.	.	.	.	.	.	.	.	.	no	no	no
ACTG1P22	ENSG00000271615	actin gamma 1 pseudogene 22 [Source:HGNC Symbol;Acc:HGNC:51502]	transcribed_processed_pseudogene	2:57755428-57766052:1	0	0	2	1	0	10	37	16	17	1	84	0.139	0	0	0.067	0.03	0	0.149	0.321	0.199	0.121	0.03	0	0	0.00062	0.00132	0	0.00084	0.00197	0.00185	0.00162	0.00032	0	.	.	.	.	.	.	.	.	.	no	no	no
ACTG1P24	ENSG00000226359	actin gamma 1 pseudogene 24 [Source:HGNC Symbol;Acc:HGNC:49661]	processed_pseudogene	17:17242010-17242886:1	0	0	1	1	0	0	2	1	1	0	6	0.01	0	0	0.034	0.03	0	0	0.017	0.012	0.007	0	0	0	9e-05	0.00014	0	0	0.0001	0.0001	4e-05	0	0	.	.	.	.	.	.	.	.	.	no	no	no
ACTG1P25	ENSG00000234996	actin gamma 1 pseudogene 25 [Source:HGNC Symbol;Acc:HGNC:54872]	transcribed_processed_pseudogene	1:202861754-202875241:1	2	59	24	96	46	34	231	211	29	2	734	1.215	0.494	0.795	0.81	2.911	1.685	0.506	2.002	2.627	0.207	0.06	0.00832	0.02126	0.0129	0.04385	0.02645	0.00314	0.01473	0.02934	0.00347	0.00079	0	.	.	.	.	.	.	.	.	.	no	no	no
ACTG1P3	ENSG00000215388	actin gamma 1 pseudogene 3 [Source:HGNC Symbol;Acc:HGNC:148]	processed_pseudogene	20:1160584-1161697:1	0	0	0	1	1	2	3	10	3	0	20	0.033	0	0	0	0.03	0.037	0.03	0.026	0.125	0.021	0	0	0	0	0.00093	0.00012	9e-05	0.0001	0.00131	0.00049	0	0	.	.	.	.	.	.	.	.	.	no	no	no
ACTG1P9	ENSG00000229349	actin gamma 1 pseudogene 9 [Source:HGNC Symbol;Acc:HGNC:154]	processed_pseudogene	6:46204729-46207386:1	1	56	27	32	19	32	101	101	10	2	381	0.631	0.247	0.755	0.911	0.97	0.696	0.477	0.875	1.257	0.071	0.06	0.01211	0.01778	0.01342	0.01053	0.011	0.00298	0.00816	0.01286	0.00084	0.00058	0	.	.	.	.	.	.	.	.	.	no	no	no
ACTG2	ENSG00000163017	actin gamma 2, smooth muscle [Source:HGNC Symbol;Acc:HGNC:145]	protein_coding	2:73892314-73919865:1	5	386	21	630	29	44	677	596	937	119	3444	5.699	1.235	5.203	0.709	19.102	1.062	0.655	5.868	7.42	6.691	3.579	0.02002	0.24993	0.01086	0.33359	0.01946	0.00781	0.043	0.06768	0.07193	0.05631	0	.	.	.	.	.	.	.	.	.	no	no	no
ACTL10	ENSG00000288649	actin like 10 [Source:HGNC Symbol;Acc:HGNC:16127]	protein_coding	20:33666943-33668525:1	50	227	116	114	133	825	6670	4859	8186	2301	23481	38.858	12.346	3.06	3.914	3.457	4.872	12.288	57.814	60.496	58.459	69.203	0.39791	0.06993	0.06176	0.07524	0.09108	0.13732	1.46513	1.77308	1.40597	2.86139	2	Cluster 1 (early spermatid 1) | Cluster 2 (early spermatid 2) | Cluster 0 (late spermatid 1) | Cluster 5 (late spermatid 2)	0.578 | 0.605 | 0.585 | 0.692	0.344 | 0.355 | 0.329 | 0.371	0.234 | 0.250 | 0.256 | 0.321	0.321	0.349 | 0.528 | 0.322 | 1.000	0.000e+00 | 0.000e+00 | 0.000e+00 | 0.000e+00	0.000e+00 | 0.000e+00 | 0.000e+00 | 0.000e+00	.	no	no	no
ACTL11P	ENSG00000234667	actin like 11, pseudogene [Source:HGNC Symbol;Acc:HGNC:44626]	unitary_pseudogene	3:49873347-49877305:-1	3	66	30	41	23	85	617	461	567	84	1977	3.272	0.741	0.89	1.012	1.243	0.842	1.266	5.348	5.74	4.049	2.526	0.01263	0.01859	0.01834	0.01833	0.01111	0.01241	0.03895	0.06049	0.04271	0.04424	0	.	.	.	.	.	.	.	.	.	no	no	no
ACTL6A	ENSG00000136518	actin like 6A [Source:HGNC Symbol;Acc:HGNC:24124]	protein_coding	3:179562886-179588407:1	51	1169	613	1380	1887	5368	6322	834	698	89	18411	30.468	12.593	15.757	20.682	41.844	69.121	79.952	54.798	10.383	4.985	2.677	0.3707	0.35425	0.3231	0.9938	2.6265	2.9518	1.03215	0.13114	0.10293	0.06017	2	Cluster 8 (diff SPG/early meiosis) | Cluster 4 (spermatocyte)	0.691 | 0.8	0.286 | 0.243	0.405 | 0.557	0.557	1.078 | 1.363	0.000e+00 | 0.000e+00	0.000e+00 | 0.000e+00	.	no	no	no
ACTL6B	ENSG00000077080	actin like 6B [Source:HGNC Symbol;Acc:HGNC:160]	protein_coding	7:100643097-100656448:-1	0	5	1	67	40	21	270	84	133	17	638	1.056	0	0.067	0.034	2.032	1.465	0.313	2.34	1.046	0.95	0.511	0	0.00165	0.00027	0.0273	0.02477	0.00301	0.02242	0.01044	0.00783	0.01066	0	.	.	.	.	.	.	.	.	.	no	no	no
ACTL7A	ENSG00000187003	actin like 7A [Source:HGNC Symbol;Acc:HGNC:161]	protein_coding	9:108862266-108863756:1	160	750	300	561	666	2658	9659	7190	13468	2931	38343	63.453	39.506	10.109	10.121	17.01	24.396	39.589	83.722	89.517	96.179	88.15	2.25491	0.32871	0.26325	0.5104	0.77508	0.8134	4.45696	7.42885	12.0112	11.7584	2	Cluster 2 (early spermatid 2) | Cluster 0 (late spermatid 1) | Cluster 5 (late spermatid 2)	0.895 | 0.962 | 0.882	0.595 | 0.536 | 0.62	0.300 | 0.426 | 0.262	0.426	0.445 | 1.524 | 1.059	0.000e+00 | 0.000e+00 | 0.000e+00	0.000e+00 | 0.000e+00 | 0.000e+00	.	no	no	no
ACTL7B	ENSG00000148156	actin like 7B [Source:HGNC Symbol;Acc:HGNC:162]	protein_coding	9:108854588-108855986:-1	78	326	142	322	369	2635	9907	7170	8953	323	30225	50.019	19.259	4.394	4.791	9.763	13.516	39.246	85.872	89.268	63.936	9.714	0.72192	0.1178	0.08477	0.23707	0.34663	0.79224	4.10816	6.1232	2.52574	0.20835	1	Cluster 1 (early spermatid 1) | Cluster 2 (early spermatid 2)	0.859 | 0.893	0.416 | 0.44	0.443 | 0.453	0.453	0.808 | 1.371	0.000e+00 | 0.000e+00	0.000e+00 | 0.000e+00	early spermatid	no	no	no
ACTL8	ENSG00000117148	actin like 8 [Source:HGNC Symbol;Acc:HGNC:24018]	protein_coding	1:17755333-17827063:1	2	38	19	738	747	58	432	252	159	9	2454	4.061	0.494	0.512	0.641	22.377	27.363	0.864	3.744	3.137	1.135	0.271	0.0102	0.01113	0.00861	0.44268	0.74231	0.01039	0.03544	0.04496	0.01376	0.00623	1	Cluster 8 (diff SPG/early meiosis)	0.274	0.03	0.244	0.244	0.737	0	0	diff SPG/early meiosis	no	no	no
ACTL9	ENSG00000181786	actin like 9 [Source:HGNC Symbol;Acc:HGNC:28494]	protein_coding	19:8697400-8698795:-1	109	473	182	366	470	1681	7429	6756	12611	2024	32101	53.124	26.914	6.376	6.14	11.098	17.216	25.037	64.393	84.114	90.059	60.872	1.2918	0.18611	0.15502	0.28723	0.50082	0.46361	2.32509	5.77009	7.29627	2.95038	2	Cluster 2 (early spermatid 2) | Cluster 0 (late spermatid 1)	0.841 | 0.901	0.484 | 0.42	0.357 | 0.481	0.481	0.834 | 1.489	0.000e+00 | 0.000e+00	0.000e+00 | 0.000e+00	.	no	no	no
ACTN1	ENSG00000072110	actinin alpha 1 [Source:HGNC Symbol;Acc:HGNC:163]	protein_coding	14:68874128-68979440:-1	20	3418	1383	1186	295	2066	2243	1627	698	104	13040	21.58	4.938	46.071	46.66	35.961	10.806	30.772	19.442	20.256	4.985	3.128	0.13866	1.92218	1.36327	0.71143	0.18106	0.33494	0.19657	0.21936	0.06854	0.05482	2	Cluster 3 (myoid/Leydig) | Cluster 7 (endothelia/macrophage)	0.461 | 0.467	0.182 | 0.203	0.279 | 0.264	0.279	1.201 | 0.727	0.000e+00 | 1.453e-294	0.000e+00 | 7.350e-290	.	no	yes	yes
ACTN1-AS1	ENSG00000259062	ACTN1 antisense RNA 1 [Source:HGNC Symbol;Acc:HGNC:20131]	lncRNA	14:68979682-68987463:1	0	13	3	7	2	356	128	22	25	4	560	0.927	0	0.175	0.101	0.212	0.073	5.302	1.109	0.274	0.179	0.12	0	0.00355	0.00191	0.00338	0.00023	0.04692	0.01059	0.00192	0.00225	0.00245	0	.	.	.	.	.	.	.	.	.	no	no	no
ACTN2	ENSG00000077522	actinin alpha 2 [Source:HGNC Symbol;Acc:HGNC:164]	protein_coding	1:236664141-236764631:1	7	74	21	221	88	535	908	397	608	102	2961	4.9	1.728	0.997	0.709	6.701	3.223	7.968	7.87	4.943	4.342	3.068	0.06267	0.02293	0.01371	0.09787	0.05637	0.11105	0.09727	0.06002	0.06111	0.05807	0	.	.	.	.	.	.	.	.	.	no	no	no
ACTN3	ENSG00000248746	actinin alpha 3 [Source:HGNC Symbol;Acc:HGNC:165]	protein_coding	11:66546395-66563334:1	0	51	12	47	24	420	532	230	367	158	1841	3.047	0	0.687	0.405	1.425	0.879	6.256	4.611	2.864	2.621	4.752	0	0.01619	0.006	0.01927	0.01336	0.0437	0.03741	0.02618	0.02618	0.08729	0	.	.	.	.	.	.	.	.	.	no	no	no
ACTN4	ENSG00000130402	actinin alpha 4 [Source:HGNC Symbol;Acc:HGNC:166]	protein_coding	19:38647649-38731589:1	42	1142	1560	387	453	533	204	89	153	28	4591	7.598	10.37	15.393	52.632	11.734	16.593	7.939	1.768	1.108	1.093	0.842	0.26113	0.3753	1.60782	0.18143	0.32801	0.08146	0.01804	0.01176	0.0167	0.01445	1	Cluster 7 (endothelia/macrophage)	0.526	0.053	0.473	0.473	1.251	0	0	endothelia/macrophage	no	no	yes
ACTN4P1	ENSG00000213493	actinin alpha 4 pseudogene 1 [Source:HGNC Symbol;Acc:HGNC:44028]	processed_pseudogene	4:116598161-116599611:1	0	0	0	0	2	3	1	0	0	0	6	0.01	0	0	0	0	0.073	0.045	0.009	0	0	0	0	0	0	0	0.00167	0.00017	5e-05	0	0	0	0	.	.	.	.	.	.	.	.	.	no	no	no
ACTN4P2	ENSG00000214141	actinin alpha 4 pseudogene 2 [Source:HGNC Symbol;Acc:HGNC:44032]	processed_pseudogene	1:37776670-37779418:1	0	0	0	0	2	1	1	0	0	0	4	0.007	0	0	0	0	0.073	0.015	0.009	0	0	0	0	0	0	0	0.00023	3e-05	3e-05	0	0	0	0	.	.	.	.	.	.	.	.	.	no	no	no
ACTP1	ENSG00000229890	actin family pseudogene 1 [Source:HGNC Symbol;Acc:HGNC:51621]	processed_pseudogene	2:108099110-108099492:1	0	0	0	2	0	0	12	7	0	0	21	0.035	0	0	0	0.061	0	0	0.104	0.087	0	0	0	0	0	0.00055	0	0	0.00067	0.0005	0	0	0	.	.	.	.	.	.	.	.	.	no	no	no
ACTR10	ENSG00000131966	actin related protein 10 [Source:HGNC Symbol;Acc:HGNC:17372]	protein_coding	14:58200080-58235636:1	118	2606	1038	1521	1499	2717	1826	573	536	94	12528	20.732	29.136	35.126	35.02	46.119	54.908	40.468	15.827	7.134	3.828	2.827	0.99113	0.94266	0.69324	1.04036	1.66049	0.72928	0.16158	0.08235	0.057	0.05454	6	Cluster 9 (Sertoli) | Cluster 3 (myoid/Leydig) | Cluster 7 (endothelia/macrophage) | Cluster 6 (undiff SPG) | Cluster 8 (diff SPG/early meiosis) | Cluster 4 (spermatocyte)	0.291 | 0.351 | 0.35 | 0.461 | 0.549 | 0.405	0.207 | 0.187 | 0.2 | 0.193 | 0.191 | 0.183	0.084 | 0.164 | 0.150 | 0.268 | 0.358 | 0.222	0.358	0.484 | 0.520 | 0.261 | 0.552 | 0.959 | 0.316	4.151e-21 | 0.000e+00 | 5.690e-75 | 3.677e-263 | 0.000e+00 | 0.000e+00	2.099e-16 | 0.000e+00 | 2.878e-70 | 1.860e-258 | 0.000e+00 | 0.000e+00	.	yes	yes	yes
ACTR1A	ENSG00000138107	actin related protein 1A [Source:HGNC Symbol;Acc:HGNC:167]	protein_coding	10:102461881-102502712:-1	100	1523	882	552	690	4018	4713	1959	2004	204	16645	27.546	24.691	20.528	29.757	16.737	25.275	59.845	40.851	24.39	14.311	6.135	0.73077	0.49327	0.52023	0.27724	0.4939	1.10631	0.53258	0.26695	0.17243	0.10833	1	Cluster 4 (spermatocyte)	0.598	0.235	0.363	0.363	0.641	0	0	spermatocyte	no	no	no
ACTR1AP1	ENSG00000233370	ACTR1A pseudogene 1 [Source:HGNC Symbol;Acc:HGNC:54703]	processed_pseudogene	2:110184054-110185179:1	0	0	1	1	0	8	169	15	7	0	201	0.333	0	0	0.034	0.03	0	0.119	1.465	0.187	0.05	0	0	0	0.00026	9e-05	0	0.00051	0.0105	0.00231	0.00034	0	0	.	.	.	.	.	.	.	.	.	no	no	no
ACTR1B	ENSG00000115073	actin related protein 1B [Source:HGNC Symbol;Acc:HGNC:168]	protein_coding	2:97655939-97664044:-1	43	1190	887	1013	441	361	885	307	410	31	5568	9.214	10.617	16.04	29.926	30.716	16.154	5.377	7.671	3.822	2.928	0.932	0.30358	0.37133	0.58622	0.57027	0.26819	0.05363	0.0795	0.03662	0.03126	0.01462	2	Cluster 7 (endothelia/macrophage) | Cluster 6 (undiff SPG)	0.299 | 0.307	0.081 | 0.08	0.218 | 0.227	0.227	0.488 | 0.475	2.669e-252 | 2.000e-299	1.350e-247 | 1.036e-294	.	no	no	yes
ACTR2	ENSG00000138071	actin related protein 2 [Source:HGNC Symbol;Acc:HGNC:169]	protein_coding	2:65227788-65271253:1	128	2016	1449	1418	785	2747	3226	1348	2305	669	16091	26.629	31.605	27.173	48.887	42.996	28.755	40.915	27.962	16.783	16.461	20.12	1.25026	0.70011	1.30605	0.99439	0.60991	0.49711	0.29178	0.15571	0.21376	0.45016	4	Cluster 9 (Sertoli) | Cluster 3 (myoid/Leydig) | Cluster 7 (endothelia/macrophage) | Cluster 6 (undiff SPG)	0.316 | 0.272 | 0.489 | 0.43	0.266 | 0.266 | 0.255 | 0.257	0.050 | 0.006 | 0.234 | 0.173	0.234	0.643 | 0.269 | 0.718 | 0.496	3.379e-50 | 1.136e-263 | 0.000e+00 | 1.606e-180	1.709e-45 | 5.748e-259 | 0.000e+00 | 8.122e-176	.	yes	yes	yes
ACTR3	ENSG00000115091	actin related protein 3 [Source:HGNC Symbol;Acc:HGNC:170]	protein_coding	2:113890063-113962596:1	144	2072	1394	1205	1780	4808	7441	3208	3340	609	26001	43.029	35.556	27.928	47.031	36.537	65.201	71.612	64.497	39.94	23.852	18.316	1.36238	0.72143	1.14261	0.77554	2.7963	1.75923	1.35174	0.57821	0.34876	0.38544	3	Cluster 8 (diff SPG/early meiosis) | Cluster 4 (spermatocyte) | Cluster 1 (early spermatid 1)	0.652 | 0.716 | 0.645	0.42 | 0.395 | 0.38	0.232 | 0.321 | 0.265	0.321	1.023 | 0.573 | 0.338	0.000e+00 | 0.000e+00 | 0.000e+00	0.000e+00 | 0.000e+00 | 0.000e+00	.	no	no	no
ACTR3B	ENSG00000133627	actin related protein 3B [Source:HGNC Symbol;Acc:HGNC:17256]	protein_coding	7:152759749-152855378:1	23	1248	282	654	736	1011	1771	1478	1503	234	8940	14.795	5.679	16.822	9.514	19.83	26.96	15.058	15.351	18.401	10.733	7.038	0.13688	0.44311	0.15643	0.31957	0.50751	0.15092	0.14351	0.20762	0.12226	0.14404	1	Cluster 8 (diff SPG/early meiosis)	0.27	0.142	0.128	0.128	0.332	2.4e-98	1.21e-93	diff SPG/early meiosis	no	no	no
ACTR3BP1	ENSG00000270242	ACTR3B pseudogene 1 [Source:HGNC Symbol;Acc:HGNC:37724]	processed_pseudogene	Y:11395699-11397076:1	0	0	0	0	0	2	0	0	0	0	2	0.003	0	0	0	0	0	0.03	0	0	0	0	0	0	0	0	0	0.00011	0	0	0	0	0	.	.	.	.	.	.	.	.	.	no	no	no
ACTR3BP4	ENSG00000249283	ACTR3B pseudogene 4 [Source:HGNC Symbol;Acc:HGNC:38681]	processed_pseudogene	4:102961956-102963327:1	0	1	0	0	2	4	0	1	1	0	9	0.015	0	0.013	0	0	0.073	0.06	0	0.012	0.007	0	0	0.00034	0	0	0.00038	0.00032	0	3e-05	5e-05	0	0	.	.	.	.	.	.	.	.	.	no	no	no
ACTR3BP5	ENSG00000227264	ACTR3B pseudogene 5 [Source:HGNC Symbol;Acc:HGNC:38682]	processed_pseudogene	10:38696424-38697902:1	0	0	0	0	0	1	0	0	0	0	1	0.002	0	0	0	0	0	0.015	0	0	0	0	0	0	0	0	0	7e-05	0	0	0	0	0	.	.	.	.	.	.	.	.	.	no	no	no
ACTR3C	ENSG00000106526	actin related protein 3C [Source:HGNC Symbol;Acc:HGNC:37282]	protein_coding	7:150243916-150323725:-1	1	120	58	112	87	909	475	272	157	19	2210	3.657	0.247	1.617	1.957	3.396	3.187	13.539	4.117	3.386	1.121	0.571	0.01128	0.04237	0.03847	0.04485	0.05226	0.11913	0.03934	0.0322	0.01133	0.00919	0	.	.	.	.	.	.	.	.	.	no	no	no
ACTR5	ENSG00000101442	actin related protein 5 [Source:HGNC Symbol;Acc:HGNC:14671]	protein_coding	20:38748460-38772520:1	6	280	138	392	422	2281	1615	277	217	19	5647	9.345	1.481	3.774	4.656	11.886	15.458	33.974	13.998	3.449	1.55	0.571	0.03888	0.07858	0.06906	0.19643	0.27556	0.36283	0.1344	0.03109	0.02281	0.01114	1	Cluster 4 (spermatocyte)	0.34	0.063	0.277	0.277	0.334	0	0	spermatocyte	no	no	no
ACTR6	ENSG00000075089	actin related protein 6 [Source:HGNC Symbol;Acc:HGNC:24025]	protein_coding	12:100199122-100241865:1	65	884	621	929	746	3925	6885	3788	1733	176	19752	32.687	16.049	11.915	20.951	28.169	27.326	58.46	59.678	47.161	12.376	5.293	0.56609	0.26823	0.3595	0.56471	0.54493	1.37875	1.34646	0.85553	0.19509	0.10679	2	Cluster 4 (spermatocyte) | Cluster 1 (early spermatid 1)	0.585 | 0.597	0.295 | 0.263	0.290 | 0.334	0.334	0.574 | 0.618	0.000e+00 | 0.000e+00	0.000e+00 | 0.000e+00	.	no	no	no
ACTR6P1	ENSG00000248915	ACTR6 pseudogene 1 [Source:HGNC Symbol;Acc:HGNC:44210]	processed_pseudogene	4:106836498-106837601:-1	0	0	0	0	0	0	0	0	0	0	0	0	0	0	0	0	0	0	0	0	0	0	0	0	0	0	0	0	0	0	0	0	0	.	.	.	.	.	.	.	.	.	no	no	no
ACTR8	ENSG00000113812	actin related protein 8 [Source:HGNC Symbol;Acc:HGNC:14672]	protein_coding	3:53867066-53882152:-1	37	451	173	1252	430	2681	3633	1686	2313	362	13018	21.543	9.136	6.079	5.837	37.962	15.751	39.931	31.49	20.991	16.518	10.887	0.26224	0.12675	0.07755	0.76692	0.27305	0.46527	0.3381	0.20713	0.2003	0.20321	1	Cluster 6 (undiff SPG)	0.38	0.206	0.174	0.174	0.501	3.59e-272	1.82e-267	undiff SPG	no	no	no
ACTRT1	ENSG00000123165	actin related protein T1 [Source:HGNC Symbol;Acc:HGNC:24027]	protein_coding	X:128050962-128052403:-1	4	11	5	13	17	39	358	957	2069	184	3657	6.052	0.988	0.148	0.169	0.394	0.623	0.581	3.103	11.915	14.775	5.534	0.03542	0.00242	0.00282	0.00803	0.0102	0.00924	0.02982	0.13607	0.18499	0.0963	0	.	.	.	.	.	.	.	.	.	no	no	no
ACTRT1P1	ENSG00000235239	ACTRT1 pseudogene 1 [Source:HGNC Symbol;Acc:HGNC:55127]	processed_pseudogene	X:128127090-128128212:-1	0	0	0	0	0	1	14	3	3	0	21	0.035	0	0	0	0	0	0.015	0.121	0.037	0.021	0	0	0	0	0	0	0.00012	0.00114	0.00029	0.0001	0	0	.	.	.	.	.	.	.	.	.	no	no	no
ACTRT2	ENSG00000169717	actin related protein T2 [Source:HGNC Symbol;Acc:HGNC:24026]	protein_coding	1:3021467-3022903:1	145	646	254	520	620	2773	9938	7253	13257	3156	38562	63.816	35.802	8.707	8.57	15.767	22.711	41.302	86.14	90.301	94.673	94.917	1.82466	0.28421	0.1909	0.48325	0.70397	0.84675	4.93114	7.0906	8.82665	12.3802	2	Cluster 2 (early spermatid 2) | Cluster 0 (late spermatid 1) | Cluster 5 (late spermatid 2)	0.903 | 0.947 | 0.949	0.598 | 0.545 | 0.62	0.305 | 0.402 | 0.329	0.402	0.564 | 1.092 | 1.315	0.000e+00 | 0.000e+00 | 0.000e+00	0.000e+00 | 0.000e+00 | 0.000e+00	.	no	no	no
ACTRT3	ENSG00000184378	actin related protein T3 [Source:HGNC Symbol;Acc:HGNC:24022]	protein_coding	3:169766921-169769561:-1	88	442	132	401	532	2241	10063	6750	5493	351	26493	43.843	21.728	5.958	4.453	12.159	19.487	33.378	87.224	84.039	39.227	10.556	0.85187	0.16733	0.09313	0.29792	0.51157	0.61409	5.61665	6.20664	1.08296	0.22981	1	Cluster 1 (early spermatid 1) | Cluster 2 (early spermatid 2)	0.872 | 0.84	0.336 | 0.377	0.536 | 0.463	0.536	1.395 | 1.416	0.000e+00 | 0.000e+00	0.000e+00 | 0.000e+00	early spermatid	no	no	no
ACVR1	ENSG00000115170	activin A receptor type 1 [Source:HGNC Symbol;Acc:HGNC:171]	protein_coding	2:157736251-157876330:-1	7	545	423	180	92	76	514	236	133	17	2223	3.679	1.728	7.346	14.271	5.458	3.37	1.132	4.455	2.938	0.95	0.511	0.03494	0.15403	0.21895	0.07663	0.04869	0.00788	0.03464	0.03415	0.01034	0.00966	0	.	.	.	.	.	.	.	.	.	no	no	no
ACVR1B	ENSG00000135503	activin A receptor type 1B [Source:HGNC Symbol;Acc:HGNC:172]	protein_coding	12:51951699-51997078:1	22	337	170	766	417	176	462	385	756	146	3637	6.019	5.432	4.542	5.735	23.226	15.275	2.621	4.005	4.793	5.399	4.391	0.14527	0.09558	0.08057	0.41283	0.24633	0.02131	0.03745	0.05174	0.05797	0.07781	0	.	.	.	.	.	.	.	.	.	no	no	no
ACVR1C	ENSG00000123612	activin A receptor type 1C [Source:HGNC Symbol;Acc:HGNC:18123]	protein_coding	2:157526767-157628864:-1	3	212	20	109	33	53	512	55	38	2	1037	1.716	0.741	2.858	0.675	3.305	1.209	0.789	4.438	0.685	0.271	0.06	0.02495	0.07258	0.00986	0.04996	0.02138	0.00444	0.0323	0.0062	0.00367	0.00045	0	.	.	.	.	.	.	.	.	.	no	no	no
ACVR2A	ENSG00000121989	activin A receptor type 2A [Source:HGNC Symbol;Acc:HGNC:173]	protein_coding	2:147844517-147930826:1	34	1416	674	1528	1139	2101	1441	374	324	49	9080	15.026	8.395	19.086	22.74	46.331	41.722	31.293	12.49	4.656	2.314	1.474	0.30159	0.51044	0.47076	1.07656	0.97059	0.33053	0.11674	0.05098	0.04158	0.02839	2	Cluster 6 (undiff SPG) | Cluster 8 (diff SPG/early meiosis)	0.463 | 0.417	0.132 | 0.138	0.331 | 0.279	0.331	0.767 | 0.675	0.000e+00 | 0.000e+00	0.000e+00 | 0.000e+00	.	no	no	no
ACVR2B	ENSG00000114739	activin A receptor type 2B [Source:HGNC Symbol;Acc:HGNC:174]	protein_coding	3:38453890-38493142:1	21	276	210	830	428	539	903	495	528	71	4301	7.118	5.185	3.72	7.085	25.167	15.678	8.028	7.827	6.163	3.771	2.135	0.13009	0.08609	0.10522	0.47968	0.26703	0.06821	0.08896	0.08326	0.04707	0.03756	1	Cluster 6 (undiff SPG)	0.252	0.061	0.191	0.191	0.452	1.13e-289	5.74e-285	undiff SPG	no	no	no
ACVR2B-AS1	ENSG00000229589	ACVR2B antisense RNA 1 [Source:HGNC Symbol;Acc:HGNC:44161]	lncRNA	3:38451027-38454820:-1	0	88	39	106	47	91	236	173	71	9	860	1.423	0	1.186	1.316	3.214	1.722	1.355	2.046	2.154	0.507	0.271	0	0.02584	0.02421	0.04956	0.02201	0.01118	0.02025	0.02558	0.00582	0.00487	0	.	.	.	.	.	.	.	.	.	no	no	no
ACVRL1	ENSG00000139567	activin A receptor like type 1 [Source:HGNC Symbol;Acc:HGNC:175]	protein_coding	12:51906908-51923361:1	6	247	644	123	33	39	94	151	59	10	1406	2.327	1.481	3.329	21.727	3.73	1.209	0.581	0.815	1.88	0.421	0.301	0.01323	0.07919	0.39333	0.04946	0.02425	0.00385	0.00696	0.02622	0.00417	0.00602	0	.	.	.	.	.	.	.	.	.	no	no	no
ACY1	ENSG00000243989	aminoacylase 1 [Source:HGNC Symbol;Acc:HGNC:177]	protein_coding	3:51983340-51989197:1	1	28	26	16	16	19	20	78	43	4	251	0.415	0.247	0.377	0.877	0.485	0.586	0.283	0.173	0.971	0.307	0.12	0.00256	0.00741	0.01061	0.0092	0.0079	0.00187	0.00177	0.01193	0.00271	0.00166	0	.	.	.	.	.	.	.	.	.	no	no	no
ACY3	ENSG00000132744	aminoacylase 3 [Source:HGNC Symbol;Acc:HGNC:24104]	protein_coding	11:67642555-67650730:-1	0	3	6	39	0	1	0	3	0	1	53	0.088	0	0.04	0.202	1.183	0	0.015	0	0.037	0	0.03	0	0.00053	0.00584	0.01424	0	7e-05	0	0.00035	0	0.00104	0	.	.	.	.	.	.	.	.	.	no	no	no
ACYP1	ENSG00000119640	acylphosphatase 1 [Source:HGNC Symbol;Acc:HGNC:179]	protein_coding	14:75053237-75069483:-1	50	526	421	249	679	3865	3813	912	444	48	11007	18.215	12.346	7.09	14.204	7.55	24.872	57.566	33.05	11.355	3.171	1.444	0.3593	0.1583	0.2341	0.12498	0.55719	1.20408	0.39068	0.11668	0.05711	0.02654	1	Cluster 4 (spermatocyte)	0.576	0.133	0.443	0.443	0.888	0	0	spermatocyte	no	no	no
ACYP2	ENSG00000170634	acylphosphatase 2 [Source:HGNC Symbol;Acc:HGNC:180]	protein_coding	2:53970838-54305300:1	87	1030	604	570	483	2731	5046	2945	2151	317	15964	26.419	21.481	13.883	20.378	17.283	17.692	40.676	43.738	36.666	15.361	9.534	0.71509	0.3035	0.33207	0.27605	0.31607	0.49139	0.58475	0.54377	0.19742	0.18092	0	.	.	.	.	.	.	.	.	.	no	no	no
ADA	ENSG00000196839	adenosine deaminase [Source:HGNC Symbol;Acc:HGNC:186]	protein_coding	20:44619522-44652233:-1	3	334	163	711	71	87	82	42	69	7	1569	2.597	0.741	4.502	5.499	21.559	2.601	1.296	0.711	0.523	0.493	0.211	0.01529	0.12213	0.0757	0.34699	0.04214	0.00948	0.00633	0.00565	0.00579	0.00337	0	.	.	.	.	.	.	.	.	.	no	no	no
ADA2	ENSG00000093072	adenosine deaminase 2 [Source:HGNC Symbol;Acc:HGNC:1839]	protein_coding	22:17178790-17258235:-1	21	492	483	169	165	218	2546	2628	1521	167	8410	13.918	5.185	6.632	16.296	5.124	6.044	3.247	22.068	32.719	10.862	5.023	0.1656	0.14001	0.27669	0.07206	0.09737	0.02964	0.24507	0.53724	0.12517	0.08926	1	Cluster 2 (early spermatid 2)	0.327	0.11	0.217	0.217	0.427	0	0	early spermatid	no	no	no
ADAD1	ENSG00000164113	adenosine deaminase domain containing 1 [Source:HGNC Symbol;Acc:HGNC:30713]	protein_coding	4:122378966-122429802:1	116	428	174	1071	1037	5780	10676	6871	10863	2194	39210	64.888	28.642	5.769	5.87	32.474	37.985	86.089	92.537	85.545	77.576	65.985	1.12737	0.16292	0.13449	0.72469	1.04552	5.39027	7.56838	5.58868	2.80617	2.38941	2	Cluster 4 (spermatocyte) | Cluster 1 (early spermatid 1) | Cluster 2 (early spermatid 2)	0.861 | 0.925 | 0.855	0.622 | 0.584 | 0.617	0.239 | 0.341 | 0.238	0.341	0.513 | 1.183 | 0.583	0.000e+00 | 0.000e+00 | 0.000e+00	0.000e+00 | 0.000e+00 | 0.000e+00	.	no	no	no
ADAD1P2	ENSG00000267511	adenosine deaminase domain containing 1 pseudogene 2 [Source:HGNC Symbol;Acc:HGNC:44552]	processed_pseudogene	18:50063795-50064440:1	0	0	0	0	0	0	0	0	0	0	0	0	0	0	0	0	0	0	0	0	0	0	0	0	0	0	0	0	0	0	0	0	0	.	.	.	.	.	.	.	.	.	no	no	no
ADAD2	ENSG00000140955	adenosine deaminase domain containing 2 [Source:HGNC Symbol;Acc:HGNC:30714]	protein_coding	16:84191138-84197168:1	26	107	163	1096	752	4667	5766	2227	1398	95	16297	26.97	6.42	1.442	5.499	33.232	27.546	69.511	49.978	27.727	9.984	2.857	0.17514	0.03003	0.08309	0.62591	0.5873	1.57155	0.75834	0.29517	0.13739	0.05587	2	Cluster 4 (spermatocyte) | Cluster 1 (early spermatid 1)	0.695 | 0.5	0.217 | 0.215	0.478 | 0.285	0.478	0.957 | 0.335	0.000e+00 | 0.000e+00	0.000e+00 | 0.000e+00	.	no	no	no
ADAL	ENSG00000168803	adenosine deaminase like [Source:HGNC Symbol;Acc:HGNC:31853]	protein_coding	15:43330672-43354569:1	26	496	194	1809	1215	1221	2498	589	522	86	8656	14.325	6.42	6.686	6.545	54.851	44.505	18.186	21.652	7.333	3.728	2.586	0.2071	0.15111	0.11076	1.41335	1.21234	0.17282	0.24114	0.08337	0.05387	0.04219	2	Cluster 6 (undiff SPG) | Cluster 8 (diff SPG/early meiosis)	0.549 | 0.445	0.12 | 0.129	0.429 | 0.316	0.429	1.031 | 0.879	0.000e+00 | 0.000e+00	0.000e+00 | 0.000e+00	.	no	no	no
ADAM10	ENSG00000137845	ADAM metallopeptidase domain 10 [Source:HGNC Symbol;Acc:HGNC:188]	protein_coding	15:58588809-58749791:-1	51	772	876	822	520	825	1094	1459	1145	143	7707	12.754	12.593	10.406	29.555	24.924	19.048	12.288	9.483	18.165	8.177	4.301	0.37268	0.23202	0.54733	0.47131	0.38028	0.11101	0.0935	0.21904	0.09965	0.08089	1	Cluster 7 (endothelia/macrophage)	0.296	0.119	0.177	0.177	0.404	3.85e-163	1.95e-158	endothelia/macrophage	no	no	yes
ADAM11	ENSG00000073670	ADAM metallopeptidase domain 11 [Source:HGNC Symbol;Acc:HGNC:189]	protein_coding	17:44758988-44781846:1	2	36	4	21	42	111	104	204	180	43	747	1.236	0.494	0.485	0.135	0.637	1.538	1.653	0.901	2.54	1.285	1.293	0.01207	0.0085	0.00247	0.01126	0.02102	0.01327	0.00943	0.02731	0.01305	0.02277	0	.	.	.	.	.	.	.	.	.	no	no	no
ADAM12	ENSG00000148848	ADAM metallopeptidase domain 12 [Source:HGNC Symbol;Acc:HGNC:190]	protein_coding	10:126012381-126388477:-1	3	471	34	308	132	863	1569	713	212	17	4322	7.152	0.741	6.349	1.147	9.339	4.835	12.854	13.6	8.877	1.514	0.511	0.01978	0.1831	0.0149	0.1457	0.06497	0.1155	0.14797	0.13421	0.02116	0.00824	0	.	.	.	.	.	.	.	.	.	no	no	no
ADAM15	ENSG00000143537	ADAM metallopeptidase domain 15 [Source:HGNC Symbol;Acc:HGNC:193]	protein_coding	1:155050566-155062775:1	10	680	1536	172	158	50	292	76	125	26	3125	5.172	2.469	9.166	51.822	5.215	5.788	0.745	2.531	0.946	0.893	0.782	0.05119	0.21423	1.73157	0.06501	0.08446	0.01032	0.02126	0.00993	0.00921	0.01419	1	Cluster 7 (endothelia/macrophage)	0.518	0.028	0.49	0.49	1.385	0	0	endothelia/macrophage	no	no	yes
ADAM17	ENSG00000151694	ADAM metallopeptidase domain 17 [Source:HGNC Symbol;Acc:HGNC:195]	protein_coding	2:9488486-9556732:-1	46	633	458	475	423	720	1902	3548	1900	140	10245	16.954	11.358	8.532	15.452	14.403	15.495	10.724	16.486	44.173	13.569	4.211	0.33688	0.19809	0.28245	0.25503	0.28627	0.09791	0.18819	0.72919	0.17388	0.07341	1	Cluster 2 (early spermatid 2)	0.442	0.128	0.314	0.314	0.548	0	0	early spermatid	no	no	no
ADAM18	ENSG00000168619	ADAM metallopeptidase domain 18 [Source:HGNC Symbol;Acc:HGNC:196]	protein_coding	8:39584489-39730065:1	21	89	31	164	296	5059	5567	1700	984	74	13985	23.144	5.185	1.2	1.046	4.973	10.842	75.35	48.253	21.165	7.027	2.226	0.13001	0.03034	0.01555	0.08218	0.19975	2.62995	0.742	0.2512	0.11416	0.04743	2	Cluster 4 (spermatocyte) | Cluster 1 (early spermatid 1)	0.754 | 0.483	0.166 | 0.172	0.588 | 0.311	0.588	1.537 | 0.253	0.000e+00 | 0.000e+00	0.000e+00 | 0.000e+00	.	no	no	no
ADAM19	ENSG00000135074	ADAM metallopeptidase domain 19 [Source:HGNC Symbol;Acc:HGNC:197]	protein_coding	5:157395534-157575775:-1	0	289	50	137	73	43	408	304	196	6	1506	2.492	0	3.895	1.687	4.154	2.674	0.64	3.536	3.785	1.4	0.18	0	0.11083	0.03566	0.06651	0.0412	0.00838	0.03427	0.04683	0.0152	0.00382	0	.	.	.	.	.	.	.	.	.	no	no	no
ADAM1B	ENSG00000226469	ADAM metallopeptidase domain 1B (pseudogene) [Source:HGNC Symbol;Acc:HGNC:44366]	unitary_pseudogene	12:111927018-111929017:1	0	6	2	8	15	18	14	7	5	0	75	0.124	0	0.081	0.067	0.243	0.549	0.268	0.121	0.087	0.036	0	0	0.00133	0.00148	0.00372	0.00735	0.00174	0.00092	0.00075	0.00019	0	0	.	.	.	.	.	.	.	.	.	no	no	no
ADAM2	ENSG00000104755	ADAM metallopeptidase domain 2 [Source:HGNC Symbol;Acc:HGNC:198]	protein_coding	8:39743735-39838289:-1	15	57	20	138	106	4652	4678	1044	547	64	11321	18.735	3.704	0.768	0.675	4.184	3.883	69.288	40.548	12.998	3.906	1.925	0.15947	0.01723	0.01094	0.06871	0.06281	2.05559	0.57167	0.14097	0.07747	0.03814	1	Cluster 4 (spermatocyte)	0.693	0.124	0.569	0.569	1.375	0	0	spermatocyte	no	no	no
ADAM20	ENSG00000134007	ADAM metallopeptidase domain 20 [Source:HGNC Symbol;Acc:HGNC:199]	protein_coding	14:70522358-70535015:-1	5	38	15	51	46	992	3083	2775	853	51	7909	13.089	1.235	0.512	0.506	1.546	1.685	14.775	26.723	34.549	6.092	1.534	0.02983	0.00927	0.00618	0.02416	0.03179	0.12431	0.31106	0.56574	0.08035	0.03281	1	Cluster 2 (early spermatid 2)	0.345	0.098	0.247	0.247	0.492	0	0	early spermatid	no	no	no
ADAM20P1	ENSG00000259158	ADAM metallopeptidase domain 20 pseudogene 1 [Source:HGNC Symbol;Acc:HGNC:20102]	transcribed_unprocessed_pseudogene	14:70453541-70483775:-1	15	40	19	92	76	474	2058	3366	2359	80	8579	14.197	3.704	0.539	0.641	2.79	2.784	7.06	17.838	41.907	16.846	2.406	0.10304	0.01272	0.01123	0.04479	0.04696	0.06413	0.18032	0.61595	0.20733	0.0469	1	Cluster 2 (early spermatid 2)	0.419	0.099	0.32	0.32	0.536	0	0	early spermatid	no	no	no
ADAM20P2	ENSG00000248574	ADAM metallopeptidase domain 20 pseudogene 2 [Source:HGNC Symbol;Acc:HGNC:43901]	processed_pseudogene	4:175574868-175576140:1	0	0	0	15	0	2	9	0	1	0	27	0.045	0	0	0	0.455	0	0.03	0.078	0	0.007	0	0	0	0	0.00419	0	0.00013	0.00057	0	7e-05	0	0	.	.	.	.	.	.	.	.	.	no	no	no
ADAM20P3	ENSG00000249162	ADAM metallopeptidase domain 20 pseudogene 3 [Source:HGNC Symbol;Acc:HGNC:43902]	processed_pseudogene	4:187746094-187748199:-1	0	0	0	0	0	1	7	12	14	3	37	0.061	0	0	0	0	0	0.015	0.061	0.149	0.1	0.09	0	0	0	0	0	3e-05	0.00033	0.00089	0.00114	0.00057	0	.	.	.	.	.	.	.	.	.	no	no	no
ADAM21	ENSG00000139985	ADAM metallopeptidase domain 21 [Source:HGNC Symbol;Acc:HGNC:200]	protein_coding	14:70417107-70460427:1	11	53	31	67	75	215	3784	2442	3681	893	11252	18.621	2.716	0.714	1.046	2.032	2.747	3.202	32.799	30.403	26.287	26.857	0.06692	0.01534	0.01033	0.03133	0.04098	0.03302	0.3901	0.35602	0.3467	0.58629	1	Cluster 5 (late spermatid 2)	0.269	0.181	0.088	0.088	0.373	1.73e-177	8.77e-173	late spermatid	no	no	no
ADAM21P1	ENSG00000235812	ADAM metallopeptidase domain 21 pseudogene 1 [Source:HGNC Symbol;Acc:HGNC:19822]	transcribed_processed_pseudogene	14:70245491-70247801:-1	1	1	0	1	1	7	59	66	81	6	223	0.369	0.247	0.013	0	0.03	0.037	0.104	0.511	0.822	0.578	0.18	0.00732	0.00061	0	9e-05	0.00036	0.00119	0.00372	0.0077	0.00541	0.00309	0	.	.	.	.	.	.	.	.	.	no	no	no
ADAM22	ENSG00000008277	ADAM metallopeptidase domain 22 [Source:HGNC Symbol;Acc:HGNC:201]	protein_coding	7:87934143-88202889:1	5	100	45	243	75	87	2144	963	394	25	4081	6.754	1.235	1.348	1.518	7.368	2.747	1.296	18.584	11.99	2.814	0.752	0.01999	0.02964	0.02065	0.11619	0.03824	0.01775	0.16787	0.11516	0.03281	0.01204	0	.	.	.	.	.	.	.	.	.	no	no	no
ADAM23	ENSG00000114948	ADAM metallopeptidase domain 23 [Source:HGNC Symbol;Acc:HGNC:202]	protein_coding	2:206443532-206621127:1	7	230	57	585	244	282	341	591	1225	78	3640	6.024	1.728	3.1	1.923	17.738	8.938	4.2	2.956	7.358	8.748	2.346	0.0295	0.06937	0.01824	0.32122	0.13931	0.03568	0.02367	0.06642	0.09314	0.03868	0	.	.	.	.	.	.	.	.	.	no	no	no
ADAM28	ENSG00000042980	ADAM metallopeptidase domain 28 [Source:HGNC Symbol;Acc:HGNC:206]	protein_coding	8:24294069-24359014:1	3	79	264	81	24	47	126	51	50	4	729	1.206	0.741	1.065	8.907	2.456	0.879	0.7	1.092	0.635	0.357	0.12	0.01323	0.02304	0.27242	0.03481	0.01013	0.00448	0.01092	0.00663	0.0042	0.00207	0	.	.	.	.	.	.	.	.	.	no	no	no
ADAM29	ENSG00000168594	ADAM metallopeptidase domain 29 [Source:HGNC Symbol;Acc:HGNC:207]	protein_coding	4:174829668-174978180:1	51	198	82	239	265	1173	8569	5846	7299	1032	24754	40.965	12.593	2.669	2.767	7.247	9.707	17.471	74.274	72.784	52.125	31.038	0.47435	0.06197	0.04538	0.12332	0.20983	0.22842	2.24804	2.36602	1.14438	0.75147	1	Cluster 1 (early spermatid 1) | Cluster 2 (early spermatid 2)	0.743 | 0.728	0.331 | 0.361	0.412 | 0.367	0.412	0.824 | 0.816	0.000e+00 | 0.000e+00	0.000e+00 | 0.000e+00	early spermatid	no	no	no
ADAM30	ENSG00000134249	ADAM metallopeptidase domain 30 [Source:HGNC Symbol;Acc:HGNC:208]	protein_coding	1:119893533-119896515:-1	15	64	26	67	93	4036	6776	2596	697	45	14415	23.855	3.704	0.863	0.877	2.032	3.407	60.113	58.733	32.321	4.978	1.353	0.1122	0.02169	0.01498	0.03489	0.06155	1.46851	1.10753	0.47414	0.08534	0.02625	2	Cluster 4 (spermatocyte) | Cluster 1 (early spermatid 1)	0.601 | 0.587	0.193 | 0.156	0.408 | 0.431	0.431	0.879 | 0.679	0.000e+00 | 0.000e+00	0.000e+00 | 0.000e+00	.	no	no	no
ADAM32	ENSG00000197140	ADAM metallopeptidase domain 32 [Source:HGNC Symbol;Acc:HGNC:15479]	protein_coding	8:39106990-39284917:1	27	646	322	941	579	4870	8825	5064	2213	211	23698	39.218	6.667	8.707	10.864	28.532	21.209	72.535	76.493	63.048	15.804	6.346	0.1724	0.20549	0.14972	0.55487	0.46671	2.45972	2.44828	1.69391	0.27167	0.12086	2	Cluster 4 (spermatocyte) | Cluster 1 (early spermatid 1) | Cluster 2 (early spermatid 2)	0.725 | 0.765 | 0.63	0.351 | 0.304 | 0.356	0.374 | 0.461 | 0.274	0.461	0.825 | 0.932 | 0.406	0.000e+00 | 0.000e+00 | 0.000e+00	0.000e+00 | 0.000e+00 | 0.000e+00	.	no	no	no
ADAM33	ENSG00000149451	ADAM metallopeptidase domain 33 [Source:HGNC Symbol;Acc:HGNC:15478]	protein_coding	20:3667965-3682246:-1	8	342	23	50	26	34	40	51	40	10	624	1.033	1.975	4.61	0.776	1.516	0.952	0.506	0.347	0.635	0.286	0.301	0.03671	0.11193	0.00765	0.02143	0.02109	0.00458	0.00263	0.00543	0.0032	0.00576	0	.	.	.	.	.	.	.	.	.	no	no	no
ADAM3A	ENSG00000197475	ADAM metallopeptidase domain 3A (pseudogene) [Source:HGNC Symbol;Acc:HGNC:209]	transcribed_unitary_pseudogene	8:39451045-39522852:-1	19	134	58	107	87	2921	4505	2081	3852	1169	14933	24.712	4.691	1.806	1.957	3.244	3.187	43.506	39.048	25.909	27.508	35.158	0.17433	0.03881	0.03276	0.06116	0.05627	0.78251	0.66834	0.36142	0.43978	0.91691	3	Cluster 4 (spermatocyte) | Cluster 1 (early spermatid 1) | Cluster 5 (late spermatid 2)	0.435 | 0.39 | 0.352	0.224 | 0.213 | 0.241	0.211 | 0.177 | 0.111	0.211	0.365 | 0.282 | 0.453	4.877e-285 | 0.000e+00 | 1.221e-151	2.467e-280 | 0.000e+00 | 6.175e-147	.	no	no	no
ADAM3B	ENSG00000260089	ADAM metallopeptidase domain 3B (pseudogene) [Source:HGNC Symbol;Acc:HGNC:210]	processed_pseudogene	16:49517762-49518601:-1	0	36	8	7	7	142	150	65	104	41	560	0.927	0	0.485	0.27	0.212	0.256	2.115	1.3	0.809	0.743	1.233	0	0.00994	0.00585	0.00261	0.00175	0.01286	0.00807	0.00582	0.00747	0.01896	0	.	.	.	.	.	.	.	.	.	no	no	no
ADAM5	ENSG00000196115	ADAM metallopeptidase domain 5 (pseudogene) [Source:HGNC Symbol;Acc:HGNC:212]	transcribed_unitary_pseudogene	8:39314591-39417378:1	44	119	50	259	150	4697	7709	3567	4936	416	21947	36.32	10.864	1.604	1.687	7.853	5.495	69.958	66.82	44.41	35.25	12.511	0.34242	0.03837	0.03246	0.15549	0.13385	2.2555	1.78538	0.80853	0.72123	0.27737	2	Cluster 4 (spermatocyte) | Cluster 1 (early spermatid 1)	0.7 | 0.668	0.321 | 0.291	0.379 | 0.377	0.379	0.907 | 0.715	0.000e+00 | 0.000e+00	0.000e+00 | 0.000e+00	.	no	no	no
ADAM6	ENSG00000271968	ADAM metallopeptidase domain 6 (pseudogene) [Source:HGNC Symbol;Acc:HGNC:213]	transcribed_unprocessed_pseudogene	14:105969729-105972269:-1	8	37	14	28	42	111	1104	3152	3078	237	7811	12.926	1.975	0.499	0.472	0.849	1.538	1.653	9.569	39.243	21.981	7.128	0.05358	0.01057	0.00888	0.01598	0.02705	0.01957	0.10262	0.63433	0.28315	0.12751	1	Cluster 2 (early spermatid 2)	0.392	0.089	0.303	0.303	0.553	0	0	early spermatid	no	no	no
ADAM7	ENSG00000069206	ADAM metallopeptidase domain 7 [Source:HGNC Symbol;Acc:HGNC:214]	protein_coding	8:24440930-24526970:1	25	56	32	91	57	338	6135	3757	1679	100	12270	20.305	6.173	0.755	1.08	2.759	2.088	5.034	53.177	46.775	11.99	3.008	0.21381	0.01594	0.01317	0.04773	0.04286	0.04852	1.46849	1.08543	0.19719	0.05556	1	Cluster 1 (early spermatid 1) | Cluster 2 (early spermatid 2)	0.532 | 0.468	0.125 | 0.162	0.407 | 0.306	0.407	0.975 | 0.579	0.000e+00 | 0.000e+00	0.000e+00 | 0.000e+00	early spermatid	no	no	no
ADAM8	ENSG00000151651	ADAM metallopeptidase domain 8 [Source:HGNC Symbol;Acc:HGNC:215]	protein_coding	10:133262420-133276868:-1	0	25	84	39	24	22	32	59	93	2	380	0.629	0	0.337	2.834	1.183	0.879	0.328	0.277	0.735	0.664	0.06	0	0.00729	0.06783	0.01573	0.01517	0.00364	0.00249	0.00969	0.00672	0.00097	0	.	.	.	.	.	.	.	.	.	no	no	no
ADAM9	ENSG00000168615	ADAM metallopeptidase domain 9 [Source:HGNC Symbol;Acc:HGNC:216]	protein_coding	8:38996754-39105445:1	58	1145	485	395	198	856	1818	1227	497	48	6727	11.132	14.321	15.433	16.363	11.977	7.253	12.749	15.758	15.276	3.549	1.444	0.4012	0.35831	0.27868	0.18154	0.11068	0.10562	0.14732	0.18232	0.04078	0.02406	0	.	.	.	.	.	.	.	.	.	no	no	no
ADAMDEC1	ENSG00000134028	ADAM like decysin 1 [Source:HGNC Symbol;Acc:HGNC:16299]	protein_coding	8:24384285-24406013:1	0	2	13	89	4	3	24	15	11	0	161	0.266	0	0.027	0.439	2.699	0.147	0.045	0.208	0.187	0.079	0	0	0.00086	0.00898	0.03542	0.00241	0.00053	0.00209	0.00227	0.00153	0	0	.	.	.	.	.	.	.	.	.	no	no	no
ADAMTS1	ENSG00000154734	ADAM metallopeptidase with thrombospondin type 1 motif 1 [Source:HGNC Symbol;Acc:HGNC:217]	protein_coding	21:26835755-26845409:-1	11	2128	587	104	45	59	171	141	187	29	3462	5.729	2.716	28.683	19.804	3.153	1.648	0.879	1.482	1.755	1.335	0.872	0.19134	1.11108	0.47602	0.04888	0.02226	0.00924	0.01473	0.01955	0.02372	0.01534	1	Cluster 3 (myoid/Leydig)	0.287	0.025	0.262	0.262	1.012	0	0	myoid/Leydig	no	yes	no
ADAMTS10	ENSG00000142303	ADAM metallopeptidase with thrombospondin type 1 motif 10 [Source:HGNC Symbol;Acc:HGNC:13201]	protein_coding	19:8580240-8610735:-1	2	232	111	53	9	17	34	354	190	15	1017	1.683	0.494	3.127	3.745	1.607	0.33	0.253	0.295	4.407	1.357	0.451	0.01637	0.07057	0.05241	0.02271	0.0047	0.0048	0.00331	0.06934	0.01281	0.008	0	.	.	.	.	.	.	.	.	.	no	no	no
ADAMTS12	ENSG00000151388	ADAM metallopeptidase with thrombospondin type 1 motif 12 [Source:HGNC Symbol;Acc:HGNC:14605]	protein_coding	5:33523535-33892019:-1	2	970	25	525	74	66	1790	470	331	34	4287	7.095	0.494	13.075	0.843	15.919	2.711	0.983	15.515	5.852	2.364	1.023	0.00293	0.31511	0.01362	0.23083	0.03816	0.00987	0.1557	0.05958	0.02823	0.02273	0	.	.	.	.	.	.	.	.	.	no	no	no
ADAMTS13	ENSG00000160323	ADAM metallopeptidase with thrombospondin type 1 motif 13 [Source:HGNC Symbol;Acc:HGNC:1366]	protein_coding	9:133414358-133459402:1	2	44	20	146	122	261	540	1582	973	169	3859	6.386	0.494	0.593	0.675	4.427	4.469	3.887	4.681	19.696	6.949	5.083	0.0191	0.01034	0.00738	0.07615	0.08114	0.03382	0.04996	0.26147	0.07425	0.09526	0	.	.	.	.	.	.	.	.	.	no	no	no
ADAMTS14	ENSG00000138316	ADAM metallopeptidase with thrombospondin type 1 motif 14 [Source:HGNC Symbol;Acc:HGNC:14899]	protein_coding	10:70672506-70762441:1	0	9	1	15	2	2	4	7	2	1	43	0.071	0	0.121	0.034	0.455	0.073	0.03	0.035	0.087	0.014	0.03	0	0.00284	0.00117	0.00514	0.00068	0.00016	0.00024	0.00149	4e-05	0.00079	0	.	.	.	.	.	.	.	.	.	no	no	no
ADAMTS15	ENSG00000166106	ADAM metallopeptidase with thrombospondin type 1 motif 15 [Source:HGNC Symbol;Acc:HGNC:16305]	protein_coding	11:130448645-130476645:1	1	68	1	26	5	14	15	3	10	0	143	0.237	0.247	0.917	0.034	0.788	0.183	0.209	0.13	0.037	0.071	0	0.00383	0.02281	0.0008	0.00959	0.00211	0.00301	0.00095	0.00016	0.00114	0	0	.	.	.	.	.	.	.	.	.	no	no	no
ADAMTS16	ENSG00000145536	ADAM metallopeptidase with thrombospondin type 1 motif 16 [Source:HGNC Symbol;Acc:HGNC:17108]	protein_coding	5:5140330-5320304:1	0	36	30	127	59	185	370	127	42	3	979	1.62	0	0.485	1.012	3.851	2.161	2.755	3.207	1.581	0.3	0.09	0	0.01228	0.01487	0.05621	0.03238	0.02084	0.02768	0.01611	0.0057	0.00096	0	.	.	.	.	.	.	.	.	.	no	no	no
ADAMTS17	ENSG00000140470	ADAM metallopeptidase with thrombospondin type 1 motif 17 [Source:HGNC Symbol;Acc:HGNC:17109]	protein_coding	15:99971437-100342005:-1	19	89	27	223	91	332	924	3520	2895	313	8433	13.956	4.691	1.2	0.911	6.762	3.333	4.945	8.009	43.825	20.674	9.414	0.12846	0.02652	0.0136	0.09777	0.05543	0.04855	0.08456	0.73288	0.26396	0.17499	1	Cluster 2 (early spermatid 2)	0.438	0.094	0.344	0.344	0.628	0	0	early spermatid	no	no	no
ADAMTS18	ENSG00000140873	ADAM metallopeptidase with thrombospondin type 1 motif 18 [Source:HGNC Symbol;Acc:HGNC:17110]	protein_coding	16:77247813-77435034:-1	4	13	14	67	18	66	125	50	13	0	370	0.612	0.988	0.175	0.472	2.032	0.659	0.983	1.083	0.623	0.093	0	0.02681	0.00503	0.00529	0.02741	0.00873	0.00756	0.00637	0.00733	0.00164	0	0	.	.	.	.	.	.	.	.	.	no	no	no
ADAMTS19	ENSG00000145808	ADAM metallopeptidase with thrombospondin type 1 motif 19 [Source:HGNC Symbol;Acc:HGNC:17111]	protein_coding	5:129460281-129738683:1	1	3	10	29	3	41	358	69	43	5	562	0.93	0.247	0.04	0.337	0.879	0.11	0.611	3.103	0.859	0.307	0.15	0.00308	0.00036	0.00396	0.01106	0.00074	0.00311	0.02158	0.00764	0.00382	0.00272	0	.	.	.	.	.	.	.	.	.	no	no	no
ADAMTS19-AS1	ENSG00000249421	ADAMTS19 antisense RNA 1 [Source:HGNC Symbol;Acc:HGNC:40797]	lncRNA	5:129424782-129461076:-1	0	0	0	2	0	4	12	12	8	0	38	0.063	0	0	0	0.061	0	0.06	0.104	0.149	0.057	0	0	0	0	0.00075	0	0.00024	0.0005	0.00132	0.00041	0	0	.	.	.	.	.	.	.	.	.	no	no	no
ADAMTS2	ENSG00000087116	ADAM metallopeptidase with thrombospondin type 1 motif 2 [Source:HGNC Symbol;Acc:HGNC:218]	protein_coding	5:179110853-179345461:-1	8	398	131	262	162	469	417	130	195	34	2206	3.651	1.975	5.365	4.42	7.944	5.934	6.985	3.614	1.619	1.393	1.023	0.03414	0.12021	0.05983	0.10975	0.09742	0.05444	0.03228	0.01488	0.01541	0.01649	0	.	.	.	.	.	.	.	.	.	no	no	no
ADAMTS20	ENSG00000173157	ADAM metallopeptidase with thrombospondin type 1 motif 20 [Source:HGNC Symbol;Acc:HGNC:17178]	protein_coding	12:43353866-43552203:-1	0	0	1	29	4	8	87	26	17	3	175	0.29	0	0	0.034	0.879	0.147	0.119	0.754	0.324	0.121	0.09	0	0	0.00027	0.01401	0.00223	0.00103	0.00604	0.00325	0.00127	0.00141	0	.	.	.	.	.	.	.	.	.	no	no	no
ADAMTS3	ENSG00000156140	ADAM metallopeptidase with thrombospondin type 1 motif 3 [Source:HGNC Symbol;Acc:HGNC:219]	protein_coding	4:72280969-72569221:-1	3	343	76	172	33	1105	1914	325	214	9	4194	6.941	0.741	4.623	2.564	5.215	1.209	16.458	16.59	4.046	1.528	0.271	0.02788	0.11831	0.03606	0.08347	0.01565	0.1395	0.15384	0.03953	0.02062	0.00541	0	.	.	.	.	.	.	.	.	.	no	no	no
ADAMTS4	ENSG00000158859	ADAM metallopeptidase with thrombospondin type 1 motif 4 [Source:HGNC Symbol;Acc:HGNC:220]	protein_coding	1:161184302-161199054:-1	6	418	229	417	160	488	1123	708	224	17	3790	6.272	1.481	5.634	7.726	12.644	5.861	7.268	9.734	8.815	1.6	0.511	0.02986	0.14045	0.1277	0.18911	0.08918	0.05808	0.0941	0.11835	0.02385	0.01202	0	.	.	.	.	.	.	.	.	.	no	no	no
ADAMTS5	ENSG00000154736	ADAM metallopeptidase with thrombospondin type 1 motif 5 [Source:HGNC Symbol;Acc:HGNC:221]	protein_coding	21:26917922-26967088:-1	2	1160	24	136	33	40	748	181	157	13	2494	4.127	0.494	15.636	0.81	4.124	1.209	0.596	6.483	2.253	1.121	0.391	0.00275	0.54552	0.01771	0.06027	0.01734	0.00431	0.06188	0.03903	0.01722	0.00726	0	.	.	.	.	.	.	.	.	.	no	no	no
ADAMTS6	ENSG00000049192	ADAM metallopeptidase with thrombospondin type 1 motif 6 [Source:HGNC Symbol;Acc:HGNC:222]	protein_coding	5:65148738-65481920:-1	7	698	308	348	54	768	1299	816	548	92	4938	8.172	1.728	9.408	10.391	10.552	1.978	11.439	11.259	10.159	3.913	2.767	0.05482	0.22914	0.19912	0.2131	0.03177	0.08028	0.09797	0.10722	0.04824	0.05165	0	.	.	.	.	.	.	.	.	.	no	no	no
ADAMTS7	ENSG00000136378	ADAM metallopeptidase with thrombospondin type 1 motif 7 [Source:HGNC Symbol;Acc:HGNC:223]	protein_coding	15:78759206-78811464:-1	2	105	44	55	119	30	40	440	134	19	988	1.635	0.494	1.415	1.484	1.668	4.359	0.447	0.347	5.478	0.957	0.571	0.00434	0.03161	0.01764	0.0217	0.07311	0.00724	0.00282	0.05898	0.00991	0.01101	0	.	.	.	.	.	.	.	.	.	no	no	no
ADAMTS7P1	ENSG00000274376	ADAMTS7 pseudogene 1 [Source:HGNC Symbol;Acc:HGNC:49407]	transcribed_unprocessed_pseudogene	15:82298553-82334609:1	0	1	2	24	15	44	65	136	39	5	331	0.548	0	0.013	0.067	0.728	0.549	0.655	0.563	1.693	0.279	0.15	0	0.00033	0.0014	0.00814	0.00672	0.00542	0.00507	0.01489	0.0025	0.00259	0	.	.	.	.	.	.	.	.	.	no	no	no
ADAMTS7P3	ENSG00000261143	ADAMTS7 pseudogene 3 [Source:HGNC Symbol;Acc:HGNC:49409]	transcribed_unprocessed_pseudogene	15:77976042-77993057:1	0	10	1	2	3	25	27	188	46	4	306	0.506	0	0.135	0.034	0.061	0.11	0.372	0.234	2.341	0.329	0.12	0	0.00336	7e-05	0.00124	0.00167	0.0023	0.0026	0.02426	0.00417	0.00255	0	.	.	.	.	.	.	.	.	.	no	no	no
ADAMTS7P4	ENSG00000218052	ADAMTS7 pseudogene 4 [Source:HGNC Symbol;Acc:HGNC:49410]	transcribed_unprocessed_pseudogene	15:85255369-85330334:-1	1	161	13	69	27	493	476	212	85	7	1544	2.555	0.247	2.17	0.439	2.092	0.989	7.343	4.126	2.639	0.607	0.211	0.00433	0.05243	0.01017	0.02738	0.0135	0.05233	0.03171	0.02325	0.00642	0.00268	0	.	.	.	.	.	.	.	.	.	no	no	no
ADAMTS8	ENSG00000134917	ADAM metallopeptidase with thrombospondin type 1 motif 8 [Source:HGNC Symbol;Acc:HGNC:224]	protein_coding	11:130404923-130428609:-1	0	89	1	70	33	148	88	75	63	12	579	0.958	0	1.2	0.034	2.122	1.209	2.204	0.763	0.934	0.45	0.361	0	0.02723	0.00018	0.02956	0.01894	0.01338	0.00648	0.01038	0.00554	0.0058	0	.	.	.	.	.	.	.	.	.	no	no	no
ADAMTS9	ENSG00000163638	ADAM metallopeptidase with thrombospondin type 1 motif 9 [Source:HGNC Symbol;Acc:HGNC:13202]	protein_coding	3:64515654-64688000:-1	4	257	430	109	25	88	362	137	65	4	1481	2.451	0.988	3.464	14.507	3.305	0.916	1.311	3.138	1.706	0.464	0.12	0.0143	0.08031	0.25017	0.04791	0.01012	0.00899	0.02939	0.01982	0.00654	0.00272	0	.	.	.	.	.	.	.	.	.	no	no	no
ADAMTS9-AS1	ENSG00000241158	ADAMTS9 antisense RNA 1 [Source:HGNC Symbol;Acc:HGNC:40625]	lncRNA	3:64561322-64592757:1	3	467	93	14	11	44	63	36	27	2	760	1.258	0.741	6.295	3.138	0.424	0.403	0.655	0.546	0.448	0.193	0.06	0.01424	0.15352	0.04484	0.00496	0.00595	0.00345	0.00291	0.00393	0.00267	0.00104	0	.	.	.	.	.	.	.	.	.	no	no	no
ADAMTS9-AS2	ENSG00000241684	ADAMTS9 antisense RNA 2 [Source:HGNC Symbol;Acc:HGNC:42435]	lncRNA	3:64684909-65053439:1	3	971	247	108	84	276	2695	1321	885	69	6659	11.02	0.741	13.088	8.333	3.275	3.077	4.111	23.36	16.447	6.32	2.075	0.01983	0.34168	0.12837	0.05558	0.04919	0.03907	0.27007	0.17686	0.07285	0.03225	0	.	.	.	.	.	.	.	.	.	no	no	no
ADAMTSL1	ENSG00000178031	ADAMTS like 1 [Source:HGNC Symbol;Acc:HGNC:14632]	protein_coding	9:17906563-18910950:1	1	128	31	67	58	148	928	679	265	23	2328	3.853	0.247	1.725	1.046	2.032	2.125	2.204	8.044	8.454	1.892	0.692	0.00111	0.03917	0.01197	0.02637	0.03823	0.02132	0.06889	0.08434	0.02219	0.01284	0	.	.	.	.	.	.	.	.	.	no	no	no
ADAMTSL2	ENSG00000197859	ADAMTS like 2 [Source:HGNC Symbol;Acc:HGNC:14631]	protein_coding	9:133532164-133575519:1	2	227	30	227	23	26	69	23	24	4	655	1.084	0.494	3.06	1.012	6.883	0.842	0.387	0.598	0.286	0.171	0.12	0.01239	0.07149	0.01251	0.09395	0.00883	0.0039	0.00524	0.00357	0.00214	0.00159	0	.	.	.	.	.	.	.	.	.	no	no	no
ADAMTSL3	ENSG00000156218	ADAMTS like 3 [Source:HGNC Symbol;Acc:HGNC:14633]	protein_coding	15:83654088-84039842:1	5	986	99	579	224	519	1877	1317	1145	297	7048	11.664	1.235	13.29	3.34	17.556	8.205	7.73	16.269	16.397	8.177	8.932	0.02285	0.34993	0.04123	0.28674	0.1379	0.05731	0.16361	0.20269	0.10043	0.1753	0	.	.	.	.	.	.	.	.	.	no	no	no
ADAMTSL4	ENSG00000143382	ADAMTS like 4 [Source:HGNC Symbol;Acc:HGNC:19706]	protein_coding	1:150549369-150560937:1	0	342	112	146	39	53	112	89	41	6	940	1.556	0	4.61	3.779	4.427	1.429	0.789	0.971	1.108	0.293	0.18	0	0.1148	0.05532	0.05827	0.01941	0.00534	0.0077	0.01435	0.00436	0.00264	0	.	.	.	.	.	.	.	.	.	no	no	no
ADAMTSL4-AS1	ENSG00000203804	ADAMTSL4 antisense RNA 1 [Source:HGNC Symbol;Acc:HGNC:32041]	lncRNA	1:150560202-150562115:-1	1	76	48	14	6	49	49	40	51	9	343	0.568	0.247	1.024	1.619	0.424	0.22	0.73	0.425	0.498	0.364	0.271	0.00063	0.02409	0.02773	0.00661	0.00237	0.00709	0.00382	0.00542	0.00399	0.00321	0	.	.	.	.	.	.	.	.	.	no	no	no
ADAMTSL4-AS2	ENSG00000237781	ADAMTSL4 antisense RNA 2 [Source:HGNC Symbol;Acc:HGNC:40895]	lncRNA	1:150548562-150557724:-1	0	8	3	1	0	3	14	12	13	3	57	0.094	0	0.108	0.101	0.03	0	0.045	0.121	0.149	0.093	0.09	0	0.00216	0.00084	0.0007	0	0.00023	0.00079	0.00121	0.00048	0.002	0	.	.	.	.	.	.	.	.	.	no	no	no
ADAMTSL5	ENSG00000185761	ADAMTS like 5 [Source:HGNC Symbol;Acc:HGNC:27912]	protein_coding	19:1505022-1513604:-1	2	658	28	82	50	37	111	86	74	13	1141	1.888	0.494	8.869	0.945	2.486	1.832	0.551	0.962	1.071	0.528	0.391	0.0104	0.19976	0.01492	0.0386	0.02395	0.00426	0.00858	0.01019	0.00548	0.00691	0	.	.	.	.	.	.	.	.	.	no	no	no
ADAP1	ENSG00000105963	ArfGAP with dual PH domains 1 [Source:HGNC Symbol;Acc:HGNC:16486]	protein_coding	7:897900-955407:-1	3	209	147	325	63	339	175	42	61	7	1371	2.269	0.741	2.817	4.96	9.854	2.308	5.049	1.517	0.523	0.436	0.211	0.01056	0.08266	0.14514	0.18819	0.05847	0.07277	0.01851	0.00608	0.00929	0.00397	0	.	.	.	.	.	.	.	.	.	no	no	no
ADAP2	ENSG00000184060	ArfGAP with dual PH domains 2 [Source:HGNC Symbol;Acc:HGNC:16487]	protein_coding	17:30906344-30959322:1	1	107	275	91	47	80	92	54	43	4	794	1.314	0.247	1.442	9.278	2.759	1.722	1.192	0.797	0.672	0.307	0.12	0.00091	0.03938	0.29433	0.03752	0.0237	0.007	0.00683	0.00972	0.00449	0.00094	0	.	.	.	.	.	.	.	.	.	no	no	no
ADAR	ENSG00000160710	adenosine deaminase RNA specific [Source:HGNC Symbol;Acc:HGNC:225]	protein_coding	1:154581695-154628013:-1	83	1875	1254	1495	433	484	831	538	650	126	7769	12.857	20.494	25.273	42.308	45.331	15.861	7.209	7.203	6.698	4.642	3.789	0.6292	0.65772	0.97095	1.08915	0.29931	0.06083	0.06603	0.08195	0.06611	0.07137	3	Cluster 3 (myoid/Leydig) | Cluster 7 (endothelia/macrophage) | Cluster 6 (undiff SPG)	0.253 | 0.423 | 0.453	0.111 | 0.113 | 0.11	0.142 | 0.310 | 0.343	0.343	0.468 | 0.694 | 0.792	0.000e+00 | 0.000e+00 | 0.000e+00	0.000e+00 | 0.000e+00 | 0.000e+00	.	no	yes	yes
ADARB1	ENSG00000197381	adenosine deaminase RNA specific B1 [Source:HGNC Symbol;Acc:HGNC:226]	protein_coding	21:45073853-45226560:1	7	196	474	464	605	511	397	203	278	30	3165	5.238	1.728	2.642	15.992	14.069	22.161	7.611	3.441	2.527	1.985	0.902	0.05432	0.0509	0.25633	0.24059	0.46009	0.06207	0.03399	0.02617	0.02552	0.0169	0	.	.	.	.	.	.	.	.	.	no	no	no
ADARB2	ENSG00000185736	adenosine deaminase RNA specific B2 (inactive) [Source:HGNC Symbol;Acc:HGNC:227]	protein_coding	10:1177313-1737525:-1	36	98	64	106	80	221	735	2143	3611	787	7881	13.042	8.889	1.321	2.159	3.214	2.93	3.292	6.371	26.681	25.787	23.669	0.28407	0.03088	0.03322	0.04689	0.05229	0.03874	0.0601	0.3064	0.33305	0.48134	0	.	.	.	.	.	.	.	.	.	no	no	no
ADARB2-AS1	ENSG00000205696	ADARB2 antisense RNA 1 [Source:HGNC Symbol;Acc:HGNC:23299]	lncRNA	10:1526637-1556984:1	0	0	0	2	0	0	0	3	0	0	5	0.008	0	0	0	0.061	0	0	0	0.037	0	0	0	0	0	0.00038	0	0	0	0.00038	0	0	0	.	.	.	.	.	.	.	.	.	no	no	no
ADAT1	ENSG00000065457	adenosine deaminase tRNA specific 1 [Source:HGNC Symbol;Acc:HGNC:228]	protein_coding	16:75596868-75623300:-1	35	715	525	568	527	1390	5426	3841	5143	1319	19489	32.252	8.642	9.637	17.713	17.223	19.304	20.703	47.031	47.821	36.728	39.669	0.24135	0.22906	0.27493	0.28655	0.35792	0.20674	0.68406	0.80689	0.56175	0.99722	2	Cluster 2 (early spermatid 2) | Cluster 5 (late spermatid 2)	0.478 | 0.397	0.299 | 0.318	0.179 | 0.079	0.179	0.291 | 0.420	2.976e-213 | 6.380e-180	1.505e-208 | 3.227e-175	.	no	no	no
ADAT2	ENSG00000189007	adenosine deaminase tRNA specific 2 [Source:HGNC Symbol;Acc:HGNC:21172]	protein_coding	6:143422832-143450695:-1	8	304	145	319	215	119	335	232	151	11	1839	3.043	1.975	4.098	4.892	9.673	7.875	1.772	2.904	2.888	1.078	0.331	0.04772	0.09016	0.07493	0.14851	0.126	0.01543	0.02793	0.03245	0.01482	0.00535	0	.	.	.	.	.	.	.	.	.	no	no	no
ADAT3	ENSG00000213638	adenosine deaminase tRNA specific 3 [Source:HGNC Symbol;Acc:HGNC:25151]	protein_coding	19:1905399-1913447:1	1	25	35	143	35	58	16	3	11	2	329	0.544	0.247	0.337	1.181	4.336	1.282	0.864	0.139	0.037	0.079	0.06	0.00082	0.00532	0.01537	0.05116	0.01798	0.00703	0.00098	0.00022	0.00104	0.00047	0	.	.	.	.	.	.	.	.	.	no	no	no
ADCK1	ENSG00000063761	aarF domain containing kinase 1 [Source:HGNC Symbol;Acc:HGNC:19038]	protein_coding	14:77800109-77935014:1	2	88	52	173	180	79	192	64	57	12	899	1.488	0.494	1.186	1.754	5.246	6.593	1.177	1.664	0.797	0.407	0.361	0.01263	0.02371	0.01892	0.06941	0.10801	0.00968	0.01515	0.00806	0.00489	0.00589	0	.	.	.	.	.	.	.	.	.	no	no	no
ADCK2	ENSG00000133597	aarF domain containing kinase 2 [Source:HGNC Symbol;Acc:HGNC:19039]	protein_coding	7:140672945-140696261:1	17	388	292	133	172	193	3899	871	834	173	6972	11.538	4.198	5.23	9.852	4.033	6.3	2.875	33.796	10.844	5.956	5.203	0.10919	0.11044	0.13276	0.05943	0.11052	0.03684	0.44738	0.09975	0.07071	0.09394	1	Cluster 1 (early spermatid 1)	0.338	0.063	0.275	0.275	0.417	0	0	early spermatid	no	no	no
ADCK5	ENSG00000173137	aarF domain containing kinase 5 [Source:HGNC Symbol;Acc:HGNC:21738]	protein_coding	8:144373101-144393242:1	12	235	144	289	474	836	846	289	456	89	3670	6.073	2.963	3.168	4.858	8.763	17.363	12.452	7.333	3.598	3.256	2.677	0.09921	0.06587	0.07357	0.13737	0.33538	0.11544	0.06724	0.03441	0.03588	0.05035	0	.	.	.	.	.	.	.	.	.	no	no	no
ADCY1	ENSG00000164742	adenylate cyclase 1 [Source:HGNC Symbol;Acc:HGNC:232]	protein_coding	7:45574140-45723116:1	2	224	144	535	119	91	254	580	211	17	2177	3.603	0.494	3.019	4.858	16.222	4.359	1.355	2.202	7.221	1.507	0.511	0.01264	0.06452	0.08287	0.27003	0.06313	0.01065	0.01755	0.07367	0.01863	0.01128	0	.	.	.	.	.	.	.	.	.	no	no	no
ADCY10	ENSG00000143199	adenylate cyclase 10 [Source:HGNC Symbol;Acc:HGNC:21285]	protein_coding	1:167809386-167914215:-1	9	49	19	70	75	1802	4449	2585	2851	119	12028	19.905	2.222	0.66	0.641	2.122	2.747	26.839	38.563	32.184	20.36	3.579	0.07004	0.0115	0.01001	0.03846	0.04341	0.25621	0.48775	0.41764	0.25576	0.05916	1	Cluster 1 (early spermatid 1)	0.386	0.155	0.231	0.231	0.323	0	0	early spermatid	no	no	no
ADCY10P1	ENSG00000161912	ADCY10 pseudogene 1 [Source:HGNC Symbol;Acc:HGNC:44143]	transcribed_unprocessed_pseudogene	6:41101022-41140835:1	4	47	26	81	67	655	549	671	299	30	2429	4.02	0.988	0.634	0.877	2.456	2.454	9.756	4.759	8.354	2.135	0.902	0.03538	0.01301	0.00923	0.03955	0.03826	0.06883	0.0499	0.12096	0.03176	0.01498	0	.	.	.	.	.	.	.	.	.	no	no	no
ADCY2	ENSG00000078295	adenylate cyclase 2 [Source:HGNC Symbol;Acc:HGNC:233]	protein_coding	5:7396138-7830081:1	13	263	80	295	87	222	558	370	467	119	2474	4.094	3.21	3.545	2.699	8.945	3.187	3.307	4.837	4.607	3.335	3.579	0.09145	0.07994	0.04223	0.1341	0.0451	0.02539	0.04183	0.04812	0.03383	0.06346	0	.	.	.	.	.	.	.	.	.	no	no	no
ADCY3	ENSG00000138031	adenylate cyclase 3 [Source:HGNC Symbol;Acc:HGNC:234]	protein_coding	2:24819169-24920237:-1	5	899	59	110	46	45	34	20	48	12	1278	2.115	1.235	12.118	1.991	3.335	1.685	0.67	0.295	0.249	0.343	0.361	0.01716	0.28102	0.02345	0.04664	0.02519	0.00781	0.00264	0.00223	0.00555	0.00696	0	.	.	.	.	.	.	.	.	.	no	no	no
ADCY4	ENSG00000129467	adenylate cyclase 4 [Source:HGNC Symbol;Acc:HGNC:235]	protein_coding	14:24318349-24335093:-1	3	34	1013	24	13	19	52	51	142	24	1375	2.275	0.741	0.458	34.177	0.728	0.476	0.283	0.451	0.635	1.014	0.722	0.02194	0.01161	0.73784	0.00944	0.0102	0.00285	0.00451	0.00517	0.01039	0.01175	1	Cluster 7 (endothelia/macrophage)	0.342	0.006	0.336	0.336	0.786	0	0	endothelia/macrophage	no	no	yes
ADCY5	ENSG00000173175	adenylate cyclase 5 [Source:HGNC Symbol;Acc:HGNC:236]	protein_coding	3:123282296-123449090:-1	2	1405	24	297	111	59	99	113	139	19	2268	3.753	0.494	18.938	0.81	9.005	4.066	0.879	0.858	1.407	0.993	0.571	0.00295	0.4788	0.01255	0.14774	0.05921	0.00686	0.00908	0.01726	0.01469	0.0117	0	.	.	.	.	.	.	.	.	.	no	no	no
ADCY6	ENSG00000174233	adenylate cyclase 6 [Source:HGNC Symbol;Acc:HGNC:237]	protein_coding	12:48766194-48789089:-1	2	297	109	70	44	111	288	173	101	15	1210	2.002	0.494	4.003	3.677	2.122	1.612	1.653	2.496	2.154	0.721	0.451	0.00709	0.09037	0.04463	0.0309	0.02329	0.01237	0.01903	0.0222	0.00747	0.00894	0	.	.	.	.	.	.	.	.	.	no	no	no
ADCY6-DT	ENSG00000257660	ADCY6 divergent transcript [Source:HGNC Symbol;Acc:HGNC:53332]	lncRNA	12:48789147-48790535:1	2	12	12	25	56	539	594	234	582	64	2120	3.508	0.494	0.162	0.405	0.758	2.051	8.028	5.149	2.913	4.156	1.925	0.00592	0.00357	0.00501	0.01157	0.02708	0.07522	0.04374	0.02174	0.04952	0.03078	0	.	.	.	.	.	.	.	.	.	no	no	no
ADCY7	ENSG00000121281	adenylate cyclase 7 [Source:HGNC Symbol;Acc:HGNC:238]	protein_coding	16:50246137-50318135:1	0	94	47	68	36	59	152	130	106	13	705	1.167	0	1.267	1.586	2.062	1.319	0.879	1.318	1.619	0.757	0.391	0	0.02894	0.02291	0.02462	0.02083	0.0074	0.01086	0.01462	0.00974	0.0063	0	.	.	.	.	.	.	.	.	.	no	no	no
ADCY8	ENSG00000155897	adenylate cyclase 8 [Source:HGNC Symbol;Acc:HGNC:239]	protein_coding	8:130780301-131040909:-1	1	28	6	19	3	46	1401	175	67	2	1748	2.893	0.247	0.377	0.202	0.576	0.11	0.685	12.144	2.179	0.478	0.06	0.00945	0.00658	0.00195	0.00563	0.00172	0.00568	0.09662	0.01577	0.00556	0.00122	0	.	.	.	.	.	.	.	.	.	no	no	no
ADCY9	ENSG00000162104	adenylate cyclase 9 [Source:HGNC Symbol;Acc:HGNC:240]	protein_coding	16:3953387-4116442:-1	7	282	105	182	76	44	103	78	64	6	947	1.567	1.728	3.801	3.543	5.518	2.784	0.655	0.893	0.971	0.457	0.18	0.0468	0.07872	0.04468	0.07364	0.04209	0.0053	0.00715	0.01154	0.00599	0.00246	0	.	.	.	.	.	.	.	.	.	no	no	no
ADCYAP1	ENSG00000141433	adenylate cyclase activating polypeptide 1 [Source:HGNC Symbol;Acc:HGNC:241]	protein_coding	18:904871-912172:1	19	7	5	14	8	726	659	141	199	37	1815	3.004	4.691	0.094	0.169	0.424	0.293	10.813	5.712	1.755	1.421	1.113	0.15853	0.00247	0.00074	0.00883	0.00285	0.08765	0.04906	0.01422	0.0174	0.01656	0	.	.	.	.	.	.	.	.	.	no	no	no
ADCYAP1R1	ENSG00000078549	ADCYAP receptor type I [Source:HGNC Symbol;Acc:HGNC:242]	protein_coding	7:31052308-31111479:1	0	200	7	88	28	14	20	17	15	3	392	0.649	0	2.696	0.236	2.668	1.026	0.209	0.173	0.212	0.107	0.09	0	0.06436	0.00455	0.0363	0.01599	0.00208	0.00202	0.00211	0.00125	0.00199	0	.	.	.	.	.	.	.	.	.	no	no	no
ADD1	ENSG00000087274	adducin 1 [Source:HGNC Symbol;Acc:HGNC:243]	protein_coding	4:2843844-2930076:1	103	2751	1354	812	968	1716	2027	2989	2260	245	15225	25.196	25.432	37.08	45.682	24.621	35.458	25.559	17.57	37.214	16.139	7.368	0.86741	1.04615	1.18806	0.43704	0.78949	0.28853	0.17254	0.73986	0.2364	0.15137	5	Cluster 9 (Sertoli) | Cluster 3 (myoid/Leydig) | Cluster 7 (endothelia/macrophage) | Cluster 8 (diff SPG/early meiosis) | Cluster 2 (early spermatid 2)	0.254 | 0.371 | 0.457 | 0.355 | 0.372	0.252 | 0.235 | 0.241 | 0.247 | 0.234	0.002 | 0.136 | 0.216 | 0.108 | 0.138	0.216	0.339 | 0.548 | 0.602 | 0.290 | 0.274	6.727e-17 | 0.000e+00 | 2.569e-215 | 4.168e-55 | 1.131e-144	3.403e-12 | 0.000e+00 | 1.300e-210 | 2.108e-50 | 5.722e-140	.	yes	yes	yes
ADD2	ENSG00000075340	adducin 2 [Source:HGNC Symbol;Acc:HGNC:244]	protein_coding	2:70607618-70768225:-1	5	53	57	148	179	104	761	1957	1884	237	5385	8.912	1.235	0.714	1.923	4.488	6.557	1.549	6.596	24.365	13.454	7.128	0.03237	0.01824	0.02691	0.06903	0.12799	0.01694	0.0605	0.31363	0.16757	0.12841	0	.	.	.	.	.	.	.	.	.	no	no	no
ADD3	ENSG00000148700	adducin 3 [Source:HGNC Symbol;Acc:HGNC:245]	protein_coding	10:109996368-110135565:1	144	3855	654	1439	1322	3412	4037	2207	1257	141	18468	30.562	35.556	51.961	22.065	43.633	48.425	50.819	34.992	27.478	8.977	4.241	1.36638	1.97846	0.40455	1.03779	1.25947	0.76796	0.42561	0.34974	0.14049	0.09211	4	Cluster 9 (Sertoli) | Cluster 3 (myoid/Leydig) | Cluster 6 (undiff SPG) | Cluster 8 (diff SPG/early meiosis)	0.356 | 0.52 | 0.436 | 0.484	0.305 | 0.276 | 0.298 | 0.297	0.051 | 0.244 | 0.138 | 0.187	0.244	0.537 | 1.040 | 0.337 | 0.492	6.095e-31 | 0.000e+00 | 2.147e-79 | 5.817e-143	3.083e-26 | 0.000e+00 | 1.086e-74 | 2.942e-138	.	yes	yes	no
ADD3-AS1	ENSG00000203876	ADD3 antisense RNA 1 [Source:HGNC Symbol;Acc:HGNC:48682]	lncRNA	10:109940104-110008381:-1	31	554	204	604	545	5412	7712	3246	5479	1094	24881	41.175	7.654	7.467	6.883	18.314	19.963	80.608	66.846	40.413	39.127	32.902	0.26487	0.16605	0.11271	0.31436	0.38695	3.0251	1.60131	0.58842	0.66568	0.77434	2	Cluster 4 (spermatocyte) | Cluster 1 (early spermatid 1)	0.806 | 0.668	0.362 | 0.351	0.444 | 0.317	0.444	1.224 | 0.505	0.000e+00 | 0.000e+00	0.000e+00 | 0.000e+00	.	no	no	no
ADGB	ENSG00000118492	androglobin [Source:HGNC Symbol;Acc:HGNC:21212]	protein_coding	6:146598967-146815462:1	36	131	42	275	242	4055	8430	4097	2372	128	19808	32.78	8.889	1.766	1.417	8.338	8.864	60.396	73.069	51.008	16.939	3.85	0.30138	0.04366	0.02337	0.14034	0.18031	1.37588	2.36071	1.11888	0.27528	0.07586	2	Cluster 4 (spermatocyte) | Cluster 1 (early spermatid 1)	0.604 | 0.731	0.293 | 0.233	0.311 | 0.498	0.498	0.418 | 1.177	0.000e+00 | 0.000e+00	0.000e+00 | 0.000e+00	.	no	no	no
ADGRA1	ENSG00000197177	adhesion G protein-coupled receptor A1 [Source:HGNC Symbol;Acc:HGNC:13838]	protein_coding	10:133087924-133131675:1	0	0	0	29	10	12	5	12	16	1	85	0.141	0	0	0	0.879	0.366	0.179	0.043	0.149	0.114	0.03	0	0	0	0.01067	0.00814	0.00196	0.00021	0.0008	0.00141	0.00087	0	.	.	.	.	.	.	.	.	.	no	no	no
ADGRA1-AS1	ENSG00000256925	ADGRA1 antisense RNA 1 [Source:HGNC Symbol;Acc:HGNC:49543]	lncRNA	10:133083073-133088491:-1	0	2	2	59	10	26	21	20	97	10	247	0.409	0	0.027	0.067	1.789	0.366	0.387	0.182	0.249	0.693	0.301	0	0.00049	0.00089	0.02662	0.00447	0.00308	0.00121	0.00401	0.00722	0.00681	0	.	.	.	.	.	.	.	.	.	no	no	no
ADGRA2	ENSG00000020181	adhesion G protein-coupled receptor A2 [Source:HGNC Symbol;Acc:HGNC:17849]	protein_coding	8:37784191-37844896:1	0	131	40	15	5	2	4	7	7	1	212	0.351	0	1.766	1.35	0.455	0.183	0.03	0.035	0.087	0.05	0.03	0	0.04075	0.01489	0.00918	0.00324	6e-05	0.00063	0.00084	0.00055	0.00115	0	.	.	.	.	.	.	.	.	.	no	no	no
ADGRA3	ENSG00000152990	adhesion G protein-coupled receptor A3 [Source:HGNC Symbol;Acc:HGNC:13839]	protein_coding	4:22345071-22516066:-1	18	444	83	372	190	79	1418	662	283	46	3595	5.949	4.444	5.985	2.8	11.28	6.96	1.177	12.291	8.242	2.021	1.383	0.09128	0.12914	0.0436	0.17791	0.10033	0.00957	0.10482	0.08682	0.02292	0.02364	0	.	.	.	.	.	.	.	.	.	no	no	no
ADGRB1	ENSG00000181790	adhesion G protein-coupled receptor B1 [Source:HGNC Symbol;Acc:HGNC:943]	protein_coding	8:142449430-142545009:1	0	271	27	105	18	10	19	38	69	21	578	0.957	0	3.653	0.911	3.184	0.659	0.149	0.165	0.473	0.493	0.632	0	0.07893	0.01033	0.0455	0.00635	0.00265	0.00118	0.00482	0.00584	0.01158	0	.	.	.	.	.	.	.	.	.	no	no	no
ADGRB2	ENSG00000121753	adhesion G protein-coupled receptor B2 [Source:HGNC Symbol;Acc:HGNC:944]	protein_coding	1:31727117-31764893:-1	13	75	7	117	58	30	404	142	308	136	1290	2.135	3.21	1.011	0.236	3.548	2.125	0.447	3.502	1.768	2.2	4.09	0.0841	0.0215	0.00246	0.04874	0.02545	0.00464	0.0315	0.01492	0.02625	0.07538	0	.	.	.	.	.	.	.	.	.	no	no	no
ADGRB3	ENSG00000135298	adhesion G protein-coupled receptor B3 [Source:HGNC Symbol;Acc:HGNC:945]	protein_coding	6:68635282-69390571:1	2	241	14	316	115	1579	2256	776	434	35	5768	9.545	0.494	3.248	0.472	9.582	4.212	23.518	19.554	9.661	3.099	1.053	0.00993	0.06674	0.00685	0.14485	0.06876	0.21252	0.17084	0.07754	0.03462	0.01929	0	.	.	.	.	.	.	.	.	.	no	no	no
ADGRD1	ENSG00000111452	adhesion G protein-coupled receptor D1 [Source:HGNC Symbol;Acc:HGNC:19893]	protein_coding	12:130953907-131141469:1	20	554	41	246	232	833	4910	1757	1064	187	9844	16.291	4.938	7.467	1.383	7.459	8.498	12.407	42.559	21.875	7.598	5.624	0.10823	0.16459	0.01932	0.11154	0.12625	0.1174	0.56361	0.27262	0.09239	0.09979	1	Cluster 1 (early spermatid 1)	0.426	0.101	0.325	0.325	0.461	0	0	early spermatid	no	no	no
ADGRD1-AS1	ENSG00000256151	ADGRD1 antisense RNA 1 [Source:HGNC Symbol;Acc:HGNC:53314]	lncRNA	12:130990138-130993976:-1	1	6	0	36	68	104	104	19	31	5	374	0.619	0.247	0.081	0	1.092	2.491	1.549	0.901	0.237	0.221	0.15	0.0042	0.00138	0	0.01726	0.03629	0.01014	0.00789	0.00347	0.00362	0.00261	0	.	.	.	.	.	.	.	.	.	no	no	no
ADGRD2	ENSG00000180264	adhesion G protein-coupled receptor D2 [Source:HGNC Symbol;Acc:HGNC:18651]	protein_coding	9:124451425-124478589:1	7	102	99	148	77	172	2445	1440	2582	956	8028	13.285	1.728	1.375	3.34	4.488	2.821	2.562	21.193	17.928	18.439	28.752	0.04538	0.02954	0.06135	0.0614	0.04759	0.0319	0.2308	0.2009	0.23361	0.66474	1	Cluster 5 (late spermatid 2)	0.288	0.124	0.164	0.164	0.535	0	1e-303	late spermatid	no	no	no
ADGRE1	ENSG00000174837	adhesion G protein-coupled receptor E1 [Source:HGNC Symbol;Acc:HGNC:3336]	protein_coding	19:6887566-6940459:1	3	6	5	142	25	44	178	554	147	11	1115	1.845	0.741	0.081	0.169	4.306	0.916	0.655	1.543	6.897	1.05	0.331	0.0145	0.00078	0.00441	0.05743	0.0152	0.00486	0.0158	0.09913	0.01152	0.00504	0	.	.	.	.	.	.	.	.	.	no	no	no
ADGRE2	ENSG00000127507	adhesion G protein-coupled receptor E2 [Source:HGNC Symbol;Acc:HGNC:3337]	protein_coding	19:14732392-14778560:-1	5	161	144	215	86	242	482	372	165	24	1896	3.138	1.235	2.17	4.858	6.519	3.15	3.604	4.178	4.631	1.178	0.722	0.03266	0.04884	0.08065	0.08448	0.04641	0.02786	0.03542	0.05143	0.01235	0.01149	0	.	.	.	.	.	.	.	.	.	no	no	no
ADGRE3	ENSG00000131355	adhesion G protein-coupled receptor E3 [Source:HGNC Symbol;Acc:HGNC:23647]	protein_coding	19:14619117-14690027:-1	1	1	1	4	0	18	14	11	2	0	52	0.086	0.247	0.013	0.034	0.121	0	0.268	0.121	0.137	0.014	0	0.00567	0.00014	0.00114	0.00217	0	0.00231	0.00089	0.00153	7e-05	0	0	.	.	.	.	.	.	.	.	.	no	no	no
ADGRE4P	ENSG00000268758	adhesion G protein-coupled receptor E4, pseudogene [Source:HGNC Symbol;Acc:HGNC:19240]	transcribed_unprocessed_pseudogene	19:6952500-6997872:-1	1	12	10	54	43	1151	1064	148	152	20	2655	4.394	0.247	0.162	0.337	1.637	1.575	17.143	9.223	1.843	1.085	0.602	0.0034	0.00363	0.00602	0.02055	0.02104	0.15005	0.06869	0.0172	0.01416	0.01234	0	.	.	.	.	.	.	.	.	.	no	no	no
ADGRE5	ENSG00000123146	adhesion G protein-coupled receptor E5 [Source:HGNC Symbol;Acc:HGNC:1711]	protein_coding	19:14380501-14408725:1	7	410	350	293	116	133	157	100	69	11	1646	2.724	1.728	5.526	11.808	8.884	4.249	1.981	1.361	1.245	0.493	0.331	0.02399	0.12157	0.22078	0.12905	0.06602	0.01609	0.01154	0.01547	0.00516	0.00608	0	.	.	.	.	.	.	.	.	.	no	no	no
ADGRF1	ENSG00000153292	adhesion G protein-coupled receptor F1 [Source:HGNC Symbol;Acc:HGNC:18990]	protein_coding	6:46997708-47042350:-1	9	150	92	205	107	168	443	237	105	13	1529	2.53	2.222	2.022	3.104	6.216	3.919	2.502	3.84	2.951	0.75	0.391	0.07315	0.04526	0.04108	0.08644	0.06225	0.01883	0.03401	0.03457	0.00922	0.0062	0	.	.	.	.	.	.	.	.	.	no	no	no
ADGRF2	ENSG00000164393	adhesion G protein-coupled receptor F2 [Source:HGNC Symbol;Acc:HGNC:18991]	protein_coding	6:47656436-47697797:1	0	38	226	48	17	31	321	160	80	3	924	1.529	0	0.512	7.625	1.455	0.623	0.462	2.782	1.992	0.571	0.09	0	0.01224	0.12482	0.01796	0.00956	0.00268	0.0209	0.01982	0.00492	0.00163	0	.	.	.	.	.	.	.	.	.	no	no	no
ADGRF3	ENSG00000173567	adhesion G protein-coupled receptor F3 [Source:HGNC Symbol;Acc:HGNC:18989]	protein_coding	2:26308173-26346817:-1	1	22	15	17	36	290	595	759	885	91	2711	4.486	0.247	0.297	0.506	0.515	1.319	4.319	5.157	9.45	6.32	2.737	0.00059	0.00592	0.00519	0.00803	0.0221	0.02961	0.04513	0.08753	0.06875	0.05084	0	.	.	.	.	.	.	.	.	.	no	no	no
ADGRF4	ENSG00000153294	adhesion G protein-coupled receptor F4 [Source:HGNC Symbol;Acc:HGNC:19011]	protein_coding	6:47685864-47722021:1	2	3	92	11	1	7	197	40	26	3	382	0.632	0.494	0.04	3.104	0.334	0.037	0.104	1.708	0.498	0.186	0.09	0.0168	0.00105	0.0487	0.00466	0.00017	0.0022	0.01467	0.00572	0.00252	0.00164	0	.	.	.	.	.	.	.	.	.	no	no	no
ADGRF5	ENSG00000069122	adhesion G protein-coupled receptor F5 [Source:HGNC Symbol;Acc:HGNC:19030]	protein_coding	6:46852522-46954943:-1	7	157	1563	108	35	138	836	386	199	46	3475	5.751	1.728	2.116	52.733	3.275	1.282	2.055	7.246	4.806	1.421	1.383	0.01864	0.08245	2.74406	0.04185	0.01341	0.01736	0.05929	0.04272	0.01845	0.02528	1	Cluster 7 (endothelia/macrophage)	0.527	0.033	0.494	0.494	1.848	0	0	endothelia/macrophage	no	no	yes
ADGRF5-AS1	ENSG00000225730	ADGRF5 antisense RNA 1 [Source:HGNC Symbol;Acc:HGNC:40864]	lncRNA	6:46903471-46909078:1	0	0	2	1	0	0	50	66	58	4	181	0.3	0	0	0.067	0.03	0	0	0.433	0.822	0.414	0.12	0	0	0.00053	0.00057	0	0	0.00349	0.00761	0.00383	0.00201	0	.	.	.	.	.	.	.	.	.	no	no	no
ADGRF5P1	ENSG00000227582	adhesion G protein-coupled receptor F5 pseudogene 1 [Source:HGNC Symbol;Acc:HGNC:32922]	transcribed_processed_pseudogene	9:62860873-62864957:-1	0	3	1	22	4	25	120	49	67	8	299	0.495	0	0.04	0.034	0.667	0.147	0.372	1.04	0.61	0.478	0.241	0	0.00113	0.00014	0.00756	0.00185	0.00303	0.00703	0.00598	0.0047	0.00388	0	.	.	.	.	.	.	.	.	.	no	no	no
ADGRG1	ENSG00000205336	adhesion G protein-coupled receptor G1 [Source:HGNC Symbol;Acc:HGNC:4512]	protein_coding	16:57610652-57665580:1	106	125	682	121	66	156	624	3549	2767	155	8351	13.82	26.173	1.685	23.009	3.669	2.418	2.324	5.409	44.186	19.76	4.662	1.17912	0.03734	0.41029	0.06319	0.04929	0.02422	0.06064	0.94489	0.33941	0.08826	2	Cluster 9 (Sertoli) | Cluster 2 (early spermatid 2)	0.262 | 0.442	0.137 | 0.092	0.125 | 0.350	0.35	0.796 | 0.749	3.801e-51 | 0.000e+00	1.923e-46 | 0.000e+00	.	yes	no	no
ADGRG2	ENSG00000173698	adhesion G protein-coupled receptor G2 [Source:HGNC Symbol;Acc:HGNC:4516]	protein_coding	X:18989307-19122637:-1	9	222	124	366	90	129	313	194	67	11	1525	2.524	2.222	2.992	4.184	11.098	3.297	1.921	2.713	2.415	0.478	0.331	0.05294	0.07377	0.06657	0.17944	0.04786	0.01436	0.02412	0.02584	0.007	0.0046	0	.	.	.	.	.	.	.	.	.	no	no	no
ADGRG3	ENSG00000182885	adhesion G protein-coupled receptor G3 [Source:HGNC Symbol;Acc:HGNC:13728]	protein_coding	16:57668277-57689378:1	0	5	17	87	1	12	37	293	301	49	802	1.327	0	0.067	0.574	2.638	0.037	0.179	0.321	3.648	2.15	1.474	0	0.00157	0.01315	0.03169	0.0005	0.00136	0.00182	0.04181	0.02499	0.02943	0	.	.	.	.	.	.	.	.	.	no	no	no
ADGRG4	ENSG00000156920	adhesion G protein-coupled receptor G4 [Source:HGNC Symbol;Acc:HGNC:18992]	protein_coding	X:136300963-136416890:1	1	36	4	37	9	11	74	20	9	1	202	0.334	0.247	0.485	0.135	1.122	0.33	0.164	0.641	0.249	0.064	0.03	0.00688	0.01147	0.00145	0.01756	0.00481	0.00071	0.00516	0.00249	0.00117	0.00058	0	.	.	.	.	.	.	.	.	.	no	no	no
ADGRG5	ENSG00000159618	adhesion G protein-coupled receptor G5 [Source:HGNC Symbol;Acc:HGNC:19010]	protein_coding	16:57542643-57591681:1	2	7	16	90	24	17	20	258	815	217	1466	2.426	0.494	0.094	0.54	2.729	0.879	0.253	0.173	3.212	5.82	6.526	0.01089	0.00115	0.00996	0.03136	0.01467	0.00296	0.00169	0.02729	0.05972	0.13018	0	.	.	.	.	.	.	.	.	.	no	no	no
ADGRG6	ENSG00000112414	adhesion G protein-coupled receptor G6 [Source:HGNC Symbol;Acc:HGNC:13841]	protein_coding	6:142301854-142446266:1	0	15	103	236	105	11	30	10	32	7	549	0.909	0	0.202	3.475	7.156	3.846	0.164	0.26	0.125	0.229	0.211	0	0.00486	0.05321	0.12897	0.06988	0.00173	0.00365	0.0019	0.00594	0.00382	0	.	.	.	.	.	.	.	.	.	no	no	no
ADGRG7	ENSG00000144820	adhesion G protein-coupled receptor G7 [Source:HGNC Symbol;Acc:HGNC:19241]	protein_coding	3:100609601-100695479:1	0	0	0	9	1	2	11	3	6	0	32	0.053	0	0	0	0.273	0.037	0.03	0.095	0.037	0.043	0	0	0	0	0.00219	0.0007	0.00055	0.00093	0.00059	0.00056	0	0	.	.	.	.	.	.	.	.	.	no	no	no
ADGRL1	ENSG00000072071	adhesion G protein-coupled receptor L1 [Source:HGNC Symbol;Acc:HGNC:20973]	protein_coding	19:14147743-14206187:-1	15	432	206	571	302	139	111	175	217	45	2213	3.662	3.704	5.823	6.95	17.314	11.062	2.07	0.962	2.179	1.55	1.353	0.08352	0.12607	0.09385	0.31374	0.1935	0.01884	0.00906	0.02543	0.02069	0.02473	0	.	.	.	.	.	.	.	.	.	no	no	no
ADGRL1-AS1	ENSG00000267169	ADGRL1 antisense RNA 1 [Source:HGNC Symbol;Acc:HGNC:55309]	lncRNA	19:14137146-14171267:1	7	98	106	81	212	104	410	1321	788	33	3160	5.229	1.728	1.321	3.576	2.456	7.766	1.549	3.554	16.447	5.627	0.992	0.02915	0.03038	0.05436	0.03717	0.13407	0.01298	0.02678	0.23635	0.06551	0.01901	0	.	.	.	.	.	.	.	.	.	no	no	no
ADGRL2	ENSG00000117114	adhesion G protein-coupled receptor L2 [Source:HGNC Symbol;Acc:HGNC:18582]	protein_coding	1:81306147-81992436:1	9	551	410	369	142	154	457	388	148	19	2647	4.38	2.222	7.427	13.833	11.189	5.201	2.294	3.961	4.831	1.057	0.571	0.04557	0.16974	0.19044	0.1702	0.07717	0.01614	0.03122	0.04914	0.01386	0.01087	0	.	.	.	.	.	.	.	.	.	no	no	no
ADGRL3	ENSG00000150471	adhesion G protein-coupled receptor L3 [Source:HGNC Symbol;Acc:HGNC:20974]	protein_coding	4:61200326-62078335:1	22	110	44	331	89	273	4133	2614	3083	428	11127	18.414	5.432	1.483	1.484	10.036	3.26	4.066	35.824	32.545	22.017	12.872	0.13148	0.03791	0.01885	0.16098	0.0555	0.04844	0.47813	0.40012	0.28749	0.27272	1	Cluster 1 (early spermatid 1)	0.358	0.143	0.215	0.215	0.306	0	0	early spermatid	no	no	no
ADGRL3-AS1	ENSG00000248692	ADGRL3 antisense RNA 1 [Source:HGNC Symbol;Acc:HGNC:50604]	lncRNA	4:62071752-62165554:-1	16	45	30	46	58	141	3358	2747	3560	431	10432	17.264	3.951	0.607	1.012	1.395	2.125	2.1	29.106	34.201	25.423	12.962	0.13309	0.01412	0.01557	0.0263	0.03207	0.02536	0.40518	0.44658	0.34996	0.28258	1	Cluster 2 (early spermatid 2)	0.342	0.147	0.195	0.195	0.256	0	0	early spermatid	no	no	no
ADGRL4	ENSG00000162618	adhesion G protein-coupled receptor L4 [Source:HGNC Symbol;Acc:HGNC:20822]	protein_coding	1:78889764-79282124:-1	4	70	1777	315	64	1905	3572	1519	1415	309	10950	18.121	0.988	0.944	59.953	9.551	2.344	28.374	30.961	18.912	10.105	9.293	0.01965	0.01824	2.69998	0.14536	0.03671	0.27417	0.32344	0.19139	0.12383	0.19032	1	Cluster 7 (endothelia/macrophage)	0.6	0.16	0.44	0.44	1.652	0	0	endothelia/macrophage	no	no	yes
ADGRV1	ENSG00000164199	adhesion G protein-coupled receptor V1 [Source:HGNC Symbol;Acc:HGNC:17416]	protein_coding	5:90529344-91164437:1	9	431	252	726	319	835	4058	2141	2083	256	11110	18.386	2.222	5.809	8.502	22.013	11.685	12.437	35.174	26.656	14.875	7.699	0.05449	0.13517	0.13945	0.36073	0.20195	0.11865	0.44009	0.32854	0.17792	0.13717	1	Cluster 1 (early spermatid 1)	0.352	0.144	0.208	0.208	0.268	0	0	early spermatid	no	no	no
ADH1A	ENSG00000187758	alcohol dehydrogenase 1A (class I), alpha polypeptide [Source:HGNC Symbol;Acc:HGNC:249]	protein_coding	4:99276369-99291003:-1	0	9	1	27	6	17	214	224	49	2	549	0.909	0	0.121	0.034	0.819	0.22	0.253	1.855	2.789	0.35	0.06	0	0.00231	0.00012	0.01155	0.00455	0.00221	0.01411	0.03004	0.00413	0.00175	0	.	.	.	.	.	.	.	.	.	no	no	no
ADH1B	ENSG00000196616	alcohol dehydrogenase 1B (class I), beta polypeptide [Source:HGNC Symbol;Acc:HGNC:250]	protein_coding	4:99304971-99352760:-1	2	242	39	107	34	160	496	837	211	14	2142	3.545	0.494	3.262	1.316	3.244	1.245	2.383	4.299	10.421	1.507	0.421	0.02096	0.18045	0.02021	0.04059	0.01554	0.01863	0.04255	0.15027	0.01789	0.00809	0	.	.	.	.	.	.	.	.	.	no	no	no
ADH1C	ENSG00000248144	alcohol dehydrogenase 1C (class I), gamma polypeptide [Source:HGNC Symbol;Acc:HGNC:251]	protein_coding	4:99336497-99352746:-1	0	48	0	71	7	10	44	149	114	1	444	0.735	0	0.647	0	2.153	0.256	0.149	0.381	1.855	0.814	0.03	0	0.01798	0	0.02792	0.00405	0.00312	0.00224	0.01557	0.0089	0.00068	0	.	.	.	.	.	.	.	.	.	no	no	no
ADH4	ENSG00000198099	alcohol dehydrogenase 4 (class II), pi polypeptide [Source:HGNC Symbol;Acc:HGNC:252]	protein_coding	4:99123657-99157792:-1	2	54	64	122	71	98	1938	804	257	18	3428	5.673	0.494	0.728	2.159	3.699	2.601	1.46	16.798	10.01	1.835	0.541	0.01236	0.01882	0.02605	0.04795	0.04551	0.01572	0.16592	0.10081	0.02336	0.00877	0	.	.	.	.	.	.	.	.	.	no	no	no
ADH5	ENSG00000197894	alcohol dehydrogenase 5 (class III), chi polypeptide [Source:HGNC Symbol;Acc:HGNC:253]	protein_coding	4:99070978-99088801:-1	243	4330	1235	1353	818	2584	2631	1149	881	157	15381	25.454	60	58.364	41.667	41.025	29.963	38.487	22.805	14.305	6.292	4.722	3.01293	2.22891	0.93245	0.88036	0.61885	0.45618	0.23388	0.15569	0.1025	0.10422	4	Cluster 9 (Sertoli) | Cluster 3 (myoid/Leydig) | Cluster 7 (endothelia/macrophage) | Cluster 6 (undiff SPG)	0.6 | 0.584 | 0.417 | 0.41	0.252 | 0.208 | 0.246 | 0.246	0.348 | 0.376 | 0.171 | 0.164	0.376	1.377 | 1.282 | 0.326 | 0.286	1.562e-130 | 0.000e+00 | 2.594e-91 | 9.689e-91	7.902e-126 | 0.000e+00 | 1.312e-86 | 4.901e-86	.	yes	yes	yes
ADH5P2	ENSG00000232676	ADH5 pseudogene 2 [Source:HGNC Symbol;Acc:HGNC:22976]	processed_pseudogene	1:79521080-79522203:1	0	1	0	1	0	0	13	18	4	0	37	0.061	0	0.013	0	0.03	0	0	0.113	0.224	0.029	0	0	0.00047	0	0.00023	0	0	0.00089	0.00094	0.00024	0	0	.	.	.	.	.	.	.	.	.	no	no	no
ADH5P3	ENSG00000223694	ADH5 pseudogene 3 [Source:HGNC Symbol;Acc:HGNC:22991]	processed_pseudogene	1:240170155-240171291:1	0	0	0	0	0	0	0	1	4	0	5	0.008	0	0	0	0	0	0	0	0.012	0.029	0	0	0	0	0	0	0	0	0.00016	0.00017	0	0	.	.	.	.	.	.	.	.	.	no	no	no
ADH5P4	ENSG00000233859	ADH5 pseudogene 4 [Source:HGNC Symbol;Acc:HGNC:21377]	processed_pseudogene	6:65836930-65838039:-1	0	0	0	0	0	0	0	1	0	0	1	0.002	0	0	0	0	0	0	0	0.012	0	0	0	0	0	0	0	0	0	0.00033	0	0	0	.	.	.	.	.	.	.	.	.	no	no	no
ADH5P5	ENSG00000234865	ADH5 pseudogene 5 [Source:HGNC Symbol;Acc:HGNC:54523]	transcribed_processed_pseudogene	5:23980587-23980938:1	0	0	0	0	0	0	0	0	0	0	0	0	0	0	0	0	0	0	0	0	0	0	0	0	0	0	0	0	0	0	0	0	0	.	.	.	.	.	.	.	.	.	no	no	no
ADH6	ENSG00000172955	alcohol dehydrogenase 6 (class V) [Source:HGNC Symbol;Acc:HGNC:255]	protein_coding	4:99202638-99219537:-1	4	29	19	85	22	49	955	1227	609	70	3069	5.079	0.988	0.391	0.641	2.577	0.806	0.73	8.278	15.276	4.349	2.105	0.02725	0.00894	0.01059	0.03716	0.01062	0.00706	0.08239	0.20489	0.04422	0.03694	0	.	.	.	.	.	.	.	.	.	no	no	no
ADH7	ENSG00000196344	alcohol dehydrogenase 7 (class IV), mu or sigma polypeptide [Source:HGNC Symbol;Acc:HGNC:256]	protein_coding	4:99412261-99435510:-1	0	2	1	11	1	1	44	74	8	0	142	0.235	0	0.027	0.034	0.334	0.037	0.015	0.381	0.921	0.057	0	0	0.00062	8e-05	0.00291	9e-05	0.00038	0.00267	0.00826	0.00076	0	0	.	.	.	.	.	.	.	.	.	no	no	no
ADHFE1	ENSG00000147576	alcohol dehydrogenase iron containing 1 [Source:HGNC Symbol;Acc:HGNC:16354]	protein_coding	8:66432492-66468907:1	6	617	67	44	22	100	64	25	39	13	997	1.65	1.481	8.316	2.26	1.334	0.806	1.489	0.555	0.311	0.279	0.391	0.04848	0.19698	0.03461	0.02232	0.01151	0.0095	0.00517	0.00416	0.00472	0.00886	0	.	.	.	.	.	.	.	.	.	no	no	no
ADI1	ENSG00000182551	acireductone dioxygenase 1 [Source:HGNC Symbol;Acc:HGNC:30576]	protein_coding	2:3497366-3519531:-1	184	3370	931	956	351	923	1243	641	776	148	9523	15.76	45.432	45.424	31.41	28.987	12.857	13.747	10.774	7.981	5.542	4.451	1.8696	1.54892	0.59763	0.52845	0.21766	0.11839	0.09769	0.08685	0.0752	0.08562	3	Cluster 9 (Sertoli) | Cluster 3 (myoid/Leydig) | Cluster 7 (endothelia/macrophage)	0.454 | 0.454 | 0.314	0.156 | 0.116 | 0.15	0.298 | 0.338 | 0.164	0.338	1.114 | 1.128 | 0.272	3.882e-84 | 0.000e+00 | 2.010e-104	1.964e-79 | 0.000e+00 | 1.016e-99	.	yes	yes	yes
ADI1P1	ENSG00000235102	acireductone dioxygenase 1 pseudogene 1 [Source:HGNC Symbol;Acc:HGNC:52339]	processed_pseudogene	20:41331123-41331660:1	0	0	0	2	0	0	0	0	0	0	2	0.003	0	0	0	0.061	0	0	0	0	0	0	0	0	0	0.00089	0	0	0	0	0	0	0	.	.	.	.	.	.	.	.	.	no	no	no
ADI1P2	ENSG00000250684	acireductone dioxygenase 1 pseudogene 2 [Source:HGNC Symbol;Acc:HGNC:52340]	processed_pseudogene	8:102688317-102688906:-1	0	0	0	4	0	8	2	20	96	1	131	0.217	0	0	0	0.121	0	0.119	0.017	0.249	0.686	0.03	0	0	0	0.00266	0	0.00037	0.00033	0.0015	0.00514	0.00041	0	.	.	.	.	.	.	.	.	.	no	no	no
ADIG	ENSG00000182035	adipogenin [Source:HGNC Symbol;Acc:HGNC:28606]	protein_coding	20:38581195-38588463:1	66	309	104	233	298	1047	3101	6050	11865	2257	25330	41.918	16.296	4.165	3.509	7.065	10.916	15.594	26.879	75.324	84.732	67.88	0.61935	0.12141	0.08658	0.16745	0.27629	0.25882	0.47581	2.85635	4.49114	3.97816	2	Cluster 2 (early spermatid 2) | Cluster 0 (late spermatid 1) | Cluster 5 (late spermatid 2)	0.753 | 0.847 | 0.679	0.368 | 0.29 | 0.404	0.385 | 0.557 | 0.275	0.557	0.545 | 1.462 | 0.895	0.000e+00 | 0.000e+00 | 0.000e+00	0.000e+00 | 0.000e+00 | 0.000e+00	.	no	no	no
ADIPOQ	ENSG00000181092	adiponectin, C1Q and collagen domain containing [Source:HGNC Symbol;Acc:HGNC:13633]	protein_coding	3:186842704-186858463:1	1	36	31	58	27	71	331	147	35	0	737	1.22	0.247	0.485	1.046	1.759	0.989	1.057	2.869	1.83	0.25	0	0.00075	0.01065	0.01588	0.02435	0.01941	0.00587	0.02943	0.02294	0.00267	0	0	.	.	.	.	.	.	.	.	.	no	no	no
ADIPOQ-AS1	ENSG00000226482	ADIPOQ antisense RNA 1 [Source:HGNC Symbol;Acc:HGNC:40648]	lncRNA	3:186851886-186856123:-1	0	11	1	29	8	62	717	132	88	27	1075	1.779	0	0.148	0.034	0.879	0.293	0.923	6.215	1.643	0.628	0.812	0	0.0037	0.00011	0.01245	0.00319	0.0061	0.05072	0.01874	0.00758	0.01699	0	.	.	.	.	.	.	.	.	.	no	no	no
ADIPOR1	ENSG00000159346	adiponectin receptor 1 [Source:HGNC Symbol;Acc:HGNC:24040]	protein_coding	1:202940826-202958572:-1	135	1088	787	874	616	2169	5307	2169	1865	417	15427	25.53	33.333	14.665	26.552	26.501	22.564	32.306	46	27.004	13.319	12.541	1.28828	0.32741	0.48168	0.47208	0.39407	0.34424	0.62761	0.29654	0.1636	0.2426	2	Cluster 9 (Sertoli) | Cluster 1 (early spermatid 1)	0.333 | 0.46	0.255 | 0.207	0.078 | 0.253	0.253	0.752 | 0.321	5.262e-86 | 0.000e+00	2.661e-81 | 0.000e+00	.	yes	no	no
ADIPOR1P1	ENSG00000232497	adiponectin receptor 1 pseudogene 1 [Source:HGNC Symbol;Acc:HGNC:44910]	processed_pseudogene	10:22162992-22165794:1	1	0	0	4	0	13	39	0	1	0	58	0.096	0.247	0	0	0.121	0	0.194	0.338	0	0.007	0	0.01082	0	0	0.00127	0	0.00134	0.0038	0	5e-05	0	0	.	.	.	.	.	.	.	.	.	no	no	no
ADIPOR1P2	ENSG00000258805	adiponectin receptor 1 pseudogene 2 [Source:HGNC Symbol;Acc:HGNC:44911]	processed_pseudogene	14:94631863-94634528:1	0	0	0	0	0	0	0	0	0	0	0	0	0	0	0	0	0	0	0	0	0	0	0	0	0	0	0	0	0	0	0	0	0	.	.	.	.	.	.	.	.	.	no	no	no
ADIPOR2	ENSG00000006831	adiponectin receptor 2 [Source:HGNC Symbol;Acc:HGNC:24041]	protein_coding	12:1688574-1788674:1	97	776	892	959	1013	1888	4150	2088	2816	514	15193	25.143	23.951	10.46	30.094	29.078	37.106	28.12	35.971	25.996	20.11	15.459	0.85546	0.23309	0.67256	0.55533	0.80301	0.29225	0.4348	0.29417	0.2581	0.28462	2	Cluster 7 (endothelia/macrophage) | Cluster 8 (diff SPG/early meiosis)	0.301 | 0.371	0.249 | 0.246	0.052 | 0.125	0.125	0.311 | 0.425	5.023e-94 | 1.044e-147	2.541e-89 | 5.278e-143	.	no	no	yes
ADIRF	ENSG00000148671	adipogenesis regulatory factor [Source:HGNC Symbol;Acc:HGNC:24043]	protein_coding	10:86968432-86983934:1	16	4605	1134	115	80	187	333	185	521	148	7324	12.12	3.951	62.07	38.259	3.487	2.93	2.785	2.886	2.303	3.721	4.451	0.52621	4.47866	1.61059	0.06609	0.07343	0.03844	0.03736	0.03049	0.05368	0.09487	2	Cluster 3 (myoid/Leydig) | Cluster 7 (endothelia/macrophage)	0.621 | 0.383	0.051 | 0.108	0.570 | 0.275	0.57	2.265 | 0.685	0.000e+00 | 0.000e+00	0.000e+00 | 0.000e+00	.	no	yes	yes
ADIRF-AS1	ENSG00000272734	ADIRF antisense RNA 1 [Source:HGNC Symbol;Acc:HGNC:45127]	lncRNA	10:86965345-86971311:-1	6	569	138	197	86	933	1445	1043	1359	287	6063	10.034	1.481	7.669	4.656	5.973	3.15	13.896	12.525	12.986	9.705	8.632	0.02913	0.17539	0.06647	0.08969	0.05018	0.11326	0.10929	0.13971	0.10369	0.16752	0	.	.	.	.	.	.	.	.	.	no	no	no
ADK	ENSG00000156110	adenosine kinase [Source:HGNC Symbol;Acc:HGNC:257]	protein_coding	10:74151202-74709963:1	119	797	312	599	501	1570	6120	2835	1679	138	14670	24.277	29.383	10.743	10.526	18.163	18.352	23.384	53.047	35.296	11.99	4.15	1.11185	0.24464	0.15422	0.28001	0.32987	0.2284	0.86563	0.50069	0.16099	0.07327	2	Cluster 9 (Sertoli) | Cluster 1 (early spermatid 1)	0.294 | 0.53	0.242 | 0.175	0.052 | 0.355	0.355	0.626 | 0.569	1.148e-55 | 0.000e+00	5.804e-51 | 0.000e+00	.	yes	no	no
ADM	ENSG00000148926	adrenomedullin [Source:HGNC Symbol;Acc:HGNC:259]	protein_coding	11:10305073-10307397:1	1	895	496	36	107	33	29	17	33	7	1654	2.737	0.247	12.064	16.734	1.092	3.919	0.492	0.251	0.212	0.236	0.211	0.00082	0.42816	0.50866	0.01587	0.06573	0.00365	0.00293	0.00239	0.00419	0.00412	0	.	.	.	.	.	.	.	.	.	no	no	no
ADM2	ENSG00000128165	adrenomedullin 2 [Source:HGNC Symbol;Acc:HGNC:28898]	protein_coding	22:50481543-50486440:1	0	111	27	125	85	150	83	66	17	1	665	1.101	0	1.496	0.911	3.79	3.114	2.234	0.719	0.822	0.121	0.03	0	0.0356	0.01208	0.05302	0.05461	0.01695	0.00657	0.00817	0.00204	0.00063	0	.	.	.	.	.	.	.	.	.	no	no	no
ADM5	ENSG00000224420	adrenomedullin 5 (putative) [Source:HGNC Symbol;Acc:HGNC:27293]	protein_coding	19:49688664-49690575:1	1	16	543	8	31	9	139	315	127	31	1220	2.019	0.247	0.216	18.32	0.243	1.136	0.134	1.205	3.922	0.907	0.932	0.00742	0.00452	0.32637	0.00296	0.02135	0.00136	0.01278	0.03108	0.0076	0.01844	0	.	.	.	.	.	.	.	.	.	no	no	no
ADNP	ENSG00000101126	activity dependent neuroprotector homeobox [Source:HGNC Symbol;Acc:HGNC:15766]	protein_coding	20:50888916-50931437:-1	95	1652	884	1683	804	2126	3816	2395	3491	644	17590	29.11	23.457	22.267	29.825	51.031	29.451	31.665	33.076	29.818	24.93	19.368	0.94104	0.59295	0.5878	1.58946	0.69031	0.47794	0.51166	0.50243	0.40035	0.43841	1	Cluster 6 (undiff SPG)	0.51	0.278	0.232	0.232	0.787	0	0	undiff SPG	no	no	no
ADNP-AS1	ENSG00000259456	ADNP antisense RNA 1 [Source:HGNC Symbol;Acc:HGNC:51227]	lncRNA	20:50930984-50945148:1	11	132	74	147	492	4872	5465	1693	1559	141	14586	24.138	2.716	1.779	2.497	4.457	18.022	72.565	47.369	21.078	11.133	4.241	0.06264	0.03729	0.03098	0.07804	0.39556	2.00124	0.72218	0.2318	0.14116	0.08077	2	Cluster 4 (spermatocyte) | Cluster 1 (early spermatid 1)	0.726 | 0.474	0.181 | 0.187	0.545 | 0.287	0.545	1.248 | 0.305	0.000e+00 | 0.000e+00	0.000e+00 | 0.000e+00	.	no	no	no
ADNP2	ENSG00000101544	ADNP homeobox 2 [Source:HGNC Symbol;Acc:HGNC:23803]	protein_coding	18:80109262-80147523:1	32	382	244	754	796	1567	1324	441	501	62	6103	10.1	7.901	5.149	8.232	22.862	29.158	23.339	11.476	5.491	3.578	1.865	0.22809	0.10865	0.11282	0.42085	0.57646	0.22738	0.10357	0.05804	0.04332	0.03424	1	Cluster 8 (diff SPG/early meiosis)	0.292	0.092	0.2	0.2	0.502	4.9e-256	2.48e-251	diff SPG/early meiosis	no	no	no
ADO	ENSG00000181915	2-aminoethanethiol dioxygenase [Source:HGNC Symbol;Acc:HGNC:23506]	protein_coding	10:62804720-62808479:1	55	821	279	301	329	3958	6351	3525	5682	1539	22840	37.798	13.58	11.066	9.413	9.127	12.051	58.951	55.049	43.887	40.577	46.286	0.45151	0.24383	0.1481	0.1473	0.20571	1.60765	1.25091	0.75157	0.71674	1.31525	3	Cluster 4 (spermatocyte) | Cluster 1 (early spermatid 1) | Cluster 5 (late spermatid 2)	0.59 | 0.55 | 0.463	0.352 | 0.337 | 0.373	0.238 | 0.213 | 0.090	0.238	0.605 | 0.396 | 0.376	0.000e+00 | 0.000e+00 | 2.141e-92	0.000e+00 | 0.000e+00 | 1.083e-87	.	no	no	no
ADORA1	ENSG00000163485	adenosine A1 receptor [Source:HGNC Symbol;Acc:HGNC:262]	protein_coding	1:203090654-203167405:1	83	41	0	27	10	16	31	18	52	18	296	0.49	20.494	0.553	0	0.819	0.366	0.238	0.269	0.224	0.371	0.541	0.62857	0.01137	0	0.01189	0.00806	0.00295	0.00229	0.00406	0.0066	0.01029	0	.	.	.	.	.	.	.	.	.	no	no	no
ADORA2A	ENSG00000128271	adenosine A2a receptor [Source:HGNC Symbol;Acc:HGNC:263]	protein_coding	22:24417879-24442357:1	0	3	0	10	11	29	43	16	24	7	143	0.237	0	0.04	0	0.303	0.403	0.432	0.373	0.199	0.171	0.211	0	0.00052	0	0.00307	0.00471	0.00232	0.00222	0.00288	0.00194	0.00256	0	.	.	.	.	.	.	.	.	.	no	no	no
ADORA2A-AS1	ENSG00000178803	ADORA2A antisense RNA 1 [Source:HGNC Symbol;Acc:HGNC:37122]	lncRNA	22:24429206-24495074:-1	4	143	84	330	299	3373	4013	1215	1125	204	10790	17.856	0.988	1.927	2.834	10.006	10.952	50.238	34.784	15.127	8.034	6.135	0.02405	0.04101	0.0516	0.15287	0.1949	0.78561	0.44002	0.14713	0.10334	0.11792	2	Cluster 4 (spermatocyte) | Cluster 1 (early spermatid 1)	0.502 | 0.348	0.138 | 0.139	0.364 | 0.209	0.364	0.599 | 0.263	0.000e+00 | 0.000e+00	0.000e+00 | 0.000e+00	.	no	no	no
ADORA2B	ENSG00000170425	adenosine A2b receptor [Source:HGNC Symbol;Acc:HGNC:264]	protein_coding	17:15945130-15975746:1	2	37	24	84	82	163	915	477	49	2	1835	3.037	0.494	0.499	0.81	2.547	3.004	2.428	7.931	5.939	0.35	0.06	0.00549	0.01121	0.01146	0.03444	0.0522	0.01674	0.0752	0.07725	0.00568	0.00077	0	.	.	.	.	.	.	.	.	.	no	no	no
ADORA2BP1	ENSG00000236136	adenosine A2b receptor pseudogene 1 [Source:HGNC Symbol;Acc:HGNC:265]	processed_pseudogene	1:209744373-209745214:1	0	0	0	0	0	3	3	14	3	0	23	0.038	0	0	0	0	0	0.045	0.026	0.174	0.021	0	0	0	0	0	0	0.00017	0.00047	0.00155	0.00016	0	0	.	.	.	.	.	.	.	.	.	no	no	no
ADORA3	ENSG00000282608	adenosine A3 receptor [Source:HGNC Symbol;Acc:HGNC:268]	protein_coding	1:111499429-111503633:-1	1	13	143	10	20	166	243	503	598	45	1742	2.883	0.247	0.175	4.825	0.303	0.733	2.472	2.106	6.262	4.271	1.353	0.00982	0.00348	0.12856	0.00355	0.01224	0.01622	0.01396	0.06259	0.04886	0.02604	0	.	.	.	.	.	.	.	.	.	no	no	no
ADPGK	ENSG00000159322	ADP dependent glucokinase [Source:HGNC Symbol;Acc:HGNC:25250]	protein_coding	15:72751294-72785846:-1	15	694	490	1016	575	1014	1330	673	467	38	6312	10.446	3.704	9.354	16.532	30.807	21.062	15.103	11.528	8.379	3.335	1.143	0.09645	0.22136	0.28297	0.53686	0.38919	0.11755	0.1075	0.10858	0.04445	0.02143	1	Cluster 6 (undiff SPG)	0.308	0.093	0.215	0.215	0.449	2.4e-280	1.21e-275	undiff SPG	no	no	no
ADPGK-AS1	ENSG00000260898	ADPGK antisense RNA 1 [Source:HGNC Symbol;Acc:HGNC:44144]	lncRNA	15:72782835-72798199:1	3	116	38	145	79	486	2793	1198	668	45	5571	9.219	0.741	1.564	1.282	4.397	2.894	7.239	24.209	14.915	4.77	1.353	0.02783	0.0334	0.02077	0.0664	0.0481	0.06174	0.24831	0.16146	0.05388	0.02522	0	.	.	.	.	.	.	.	.	.	no	no	no
ADPRH	ENSG00000144843	ADP-ribosylarginine hydrolase [Source:HGNC Symbol;Acc:HGNC:269]	protein_coding	3:119579268-119589945:1	8	92	316	40	8	7	21	38	18	4	552	0.913	1.975	1.24	10.661	1.213	0.293	0.104	0.182	0.473	0.129	0.12	0.03477	0.02726	0.15451	0.01677	0.00447	0.00085	0.00157	0.00262	0.00152	0.0013	0	.	.	.	.	.	.	.	.	.	no	no	no
ADPRHL1	ENSG00000153531	ADP-ribosylhydrolase like 1 [Source:HGNC Symbol;Acc:HGNC:21303]	protein_coding	13:113399610-113453524:-1	10	89	33	155	65	109	155	194	111	27	948	1.569	2.469	1.2	1.113	4.7	2.381	1.623	1.344	2.415	0.793	0.812	0.0592	0.02302	0.01413	0.06088	0.03707	0.01246	0.01291	0.02691	0.00894	0.01427	0	.	.	.	.	.	.	.	.	.	no	no	no
ADPRM	ENSG00000170222	ADP-ribose/CDP-alcohol diphosphatase, manganese dependent [Source:HGNC Symbol;Acc:HGNC:30925]	protein_coding	17:10697594-10711558:1	11	495	208	358	359	1082	1835	295	169	12	4824	7.983	2.716	6.672	7.018	10.855	13.15	16.116	15.905	3.673	1.207	0.361	0.10722	0.14785	0.10614	0.16524	0.21044	0.13906	0.13707	0.02789	0.01539	0.00698	0	.	.	.	.	.	.	.	.	.	no	no	no
ADPRS	ENSG00000116863	ADP-ribosylserine hydrolase [Source:HGNC Symbol;Acc:HGNC:21304]	protein_coding	1:36088892-36093932:1	78	924	492	1191	941	1327	941	444	409	80	6827	11.298	19.259	12.455	16.599	36.113	34.469	19.765	8.156	5.528	2.921	2.406	0.62327	0.27095	0.25035	0.73247	0.7416	0.20359	0.08196	0.06285	0.04167	0.04757	2	Cluster 6 (undiff SPG) | Cluster 8 (diff SPG/early meiosis)	0.361 | 0.345	0.099 | 0.102	0.262 | 0.243	0.262	0.591 | 0.592	0.000e+00 | 1.511e-291	0.000e+00 | 7.645e-287	.	no	no	no
ADRA1A	ENSG00000120907	adrenoceptor alpha 1A [Source:HGNC Symbol;Acc:HGNC:277]	protein_coding	8:26748150-26867278:-1	8	70	59	63	43	153	543	2695	1974	140	5748	9.512	1.975	0.944	1.991	1.91	1.575	2.279	4.707	33.553	14.097	4.211	0.05373	0.02295	0.0364	0.02714	0.02394	0.02224	0.04297	0.45202	0.16095	0.0698	1	Cluster 2 (early spermatid 2)	0.336	0.058	0.278	0.278	0.443	0	0	early spermatid	no	no	no
ADRA1B	ENSG00000170214	adrenoceptor alpha 1B [Source:HGNC Symbol;Acc:HGNC:278]	protein_coding	5:159865080-159973012:1	1	41	15	78	8	3	38	12	5	1	202	0.334	0.247	0.553	0.506	2.365	0.293	0.045	0.329	0.149	0.036	0.03	0.00238	0.00881	0.00335	0.03037	0.00283	0.00105	0.00218	0.00092	0.00026	0.00058	0	.	.	.	.	.	.	.	.	.	no	no	no
ADRA1D	ENSG00000171873	adrenoceptor alpha 1D [Source:HGNC Symbol;Acc:HGNC:280]	protein_coding	20:4220630-4249287:-1	6	16	1	84	14	7	11	3	3	3	148	0.245	1.481	0.216	0.034	2.547	0.513	0.104	0.095	0.037	0.021	0.09	0.02568	0.00429	8e-05	0.02898	0.0088	0.00034	0.0009	0.0007	0.00075	0.00143	0	.	.	.	.	.	.	.	.	.	no	no	no
ADRA2A	ENSG00000150594	adrenoceptor alpha 2A [Source:HGNC Symbol;Acc:HGNC:281]	protein_coding	10:111077029-111080907:1	3	477	82	35	38	1809	1050	313	132	6	3945	6.529	0.741	6.429	2.767	1.061	1.392	26.944	9.101	3.897	0.943	0.18	0.02225	0.15732	0.03429	0.01423	0.02468	0.30139	0.06481	0.03045	0.01552	0.00433	1	Cluster 4 (spermatocyte)	0.269	0.04	0.229	0.229	0.311	0	0	spermatocyte	no	no	no
ADRA2B	ENSG00000274286	adrenoceptor alpha 2B [Source:HGNC Symbol;Acc:HGNC:282]	protein_coding	2:96112876-96116571:-1	2	147	43	25	4	8	7	6	9	3	254	0.42	0.494	1.981	1.451	0.758	0.147	0.119	0.061	0.075	0.064	0.09	0.00942	0.04974	0.02308	0.01214	0.00184	0.00091	0.00037	0.00135	0.00052	0.00133	0	.	.	.	.	.	.	.	.	.	no	no	no
ADRA2C	ENSG00000184160	adrenoceptor alpha 2C [Source:HGNC Symbol;Acc:HGNC:283]	protein_coding	4:3766348-3768526:1	7	196	251	233	28	6	12	9	27	3	772	1.278	1.728	2.642	8.468	7.065	1.026	0.089	0.104	0.112	0.193	0.09	0.039	0.05076	0.11897	0.1135	0.01516	0.00091	0.00073	0.00064	0.00231	0.00123	0	.	.	.	.	.	.	.	.	.	no	no	no
ADRB1	ENSG00000043591	adrenoceptor beta 1 [Source:HGNC Symbol;Acc:HGNC:285]	protein_coding	10:114043866-114046904:1	1	52	64	52	20	285	115	67	41	5	702	1.162	0.247	0.701	2.159	1.577	0.733	4.245	0.997	0.834	0.293	0.15	0.00908	0.01612	0.06292	0.02829	0.01531	0.03573	0.01214	0.00902	0.00418	0.00323	0	.	.	.	.	.	.	.	.	.	no	no	no
ADRB2	ENSG00000169252	adrenoceptor beta 2 [Source:HGNC Symbol;Acc:HGNC:286]	protein_coding	5:148826611-148828623:1	1	44	256	11	9	85	74	21	12	1	514	0.851	0.247	0.593	8.637	0.334	0.33	1.266	0.641	0.261	0.086	0.03	0.00378	0.01215	0.20546	0.00432	0.00455	0.01024	0.00402	0.00267	0.00133	0.00059	0	.	.	.	.	.	.	.	.	.	no	no	no
ADRB3	ENSG00000188778	adrenoceptor beta 3 [Source:HGNC Symbol;Acc:HGNC:288]	protein_coding	8:37962990-37966599:-1	0	64	19	32	16	15	80	47	8	2	283	0.468	0	0.863	0.641	0.97	0.586	0.223	0.693	0.585	0.057	0.06	0	0.0189	0.01176	0.01337	0.00672	0.00172	0.00709	0.00566	0.00049	0.00068	0	.	.	.	.	.	.	.	.	.	no	no	no
ADRM1	ENSG00000130706	adhesion regulating molecule 1 [Source:HGNC Symbol;Acc:HGNC:15759]	protein_coding	20:62302093-62308862:1	163	2804	1280	2801	1929	4835	6470	4834	11668	2700	39484	65.342	40.247	37.795	43.185	84.93	70.659	72.014	56.08	60.184	83.325	81.203	1.57542	1.07681	0.99775	7.42436	3.00819	1.89826	1.03259	1.60266	4.20515	4.97917	2	Cluster 6 (undiff SPG) | Cluster 0 (late spermatid 1) | Cluster 5 (late spermatid 2)	0.849 | 0.833 | 0.812	0.642 | 0.599 | 0.644	0.207 | 0.234 | 0.168	0.234	1.342 | 0.739 | 0.788	0.000e+00 | 0.000e+00 | 0.000e+00	0.000e+00 | 0.000e+00 | 0.000e+00	.	no	no	no
ADSL	ENSG00000239900	adenylosuccinate lyase [Source:HGNC Symbol;Acc:HGNC:291]	protein_coding	22:40346461-40390463:1	50	731	442	1307	1111	1703	2545	1812	1533	67	11301	18.702	12.346	9.853	14.912	39.63	40.696	25.365	22.059	22.56	10.948	2.015	0.31913	0.22221	0.23212	0.79695	0.95117	0.24863	0.22469	0.2766	0.12157	0.03527	2	Cluster 6 (undiff SPG) | Cluster 8 (diff SPG/early meiosis)	0.396 | 0.407	0.175 | 0.177	0.221 | 0.230	0.23	0.542 | 0.663	4.403e-287 | 0.000e+00	2.227e-282 | 0.000e+00	.	no	no	no
ADSS1	ENSG00000185100	adenylosuccinate synthase 1 [Source:HGNC Symbol;Acc:HGNC:20093]	protein_coding	14:104724229-104747325:1	93	803	181	1066	726	2621	9995	6434	7026	693	29638	49.048	22.963	10.824	6.107	32.323	26.593	39.038	86.634	80.105	50.175	20.842	0.81707	0.2643	0.11848	0.67432	0.62193	0.65584	5.1182	4.20115	1.43771	0.43156	1	Cluster 1 (early spermatid 1) | Cluster 2 (early spermatid 2)	0.866 | 0.801	0.402 | 0.443	0.464 | 0.358	0.464	1.377 | 0.920	0.000e+00 | 0.000e+00	0.000e+00 | 0.000e+00	early spermatid	no	no	no
ADSS2	ENSG00000035687	adenylosuccinate synthase 2 [Source:HGNC Symbol;Acc:HGNC:292]	protein_coding	1:244408494-244451909:-1	106	872	666	1657	1429	4122	6638	3759	5508	1089	25846	42.772	26.173	11.754	22.47	50.243	52.344	61.394	57.537	46.8	39.334	32.752	0.89795	0.26366	0.39832	1.61803	1.51338	1.53378	1.15278	0.79727	0.70352	0.80889	3	Cluster 6 (undiff SPG) | Cluster 8 (diff SPG/early meiosis) | Cluster 4 (spermatocyte)	0.502 | 0.523 | 0.614	0.423 | 0.423 | 0.404	0.079 | 0.100 | 0.210	0.21	0.479 | 0.411 | 0.460	1.357e-128 | 1.610e-106 | 7.746e-276	6.865e-124 | 8.141e-102 | 3.918e-271	.	no	no	no
ADTRP	ENSG00000111863	androgen dependent TFPI regulating protein [Source:HGNC Symbol;Acc:HGNC:21214]	protein_coding	6:11712054-11807046:-1	14	86	77	99	109	375	5218	3641	4265	852	14736	24.386	3.457	1.159	2.598	3.002	3.993	5.585	45.228	45.331	30.458	25.624	0.12396	0.02366	0.03954	0.04953	0.06527	0.07386	0.68385	0.72605	0.42847	0.6062	1	Cluster 1 (early spermatid 1) | Cluster 2 (early spermatid 2)	0.452 | 0.453	0.195 | 0.212	0.257 | 0.241	0.257	0.365 | 0.380	0.000e+00 | 0.000e+00	0.000e+00 | 0.000e+00	early spermatid	no	no	no
AEBP1	ENSG00000106624	AE binding protein 1 [Source:HGNC Symbol;Acc:HGNC:303]	protein_coding	7:44104345-44114562:1	17	5000	400	193	171	141	318	196	388	72	6896	11.412	4.198	67.395	13.495	5.852	6.264	2.1	2.756	2.44	2.771	2.165	0.09884	4.71346	0.22004	0.09621	0.13557	0.02907	0.02869	0.03172	0.0484	0.05096	1	Cluster 3 (myoid/Leydig)	0.674	0.036	0.638	0.638	2.435	0	0	myoid/Leydig	no	yes	no
AEBP2	ENSG00000139154	AE binding protein 2 [Source:HGNC Symbol;Acc:HGNC:24051]	protein_coding	12:19404045-19720801:1	71	1222	539	1110	676	791	509	211	223	36	5388	8.917	17.531	16.471	18.185	33.657	24.762	11.781	4.412	2.627	1.593	1.083	0.51518	0.40766	0.31517	0.6882	0.4964	0.10258	0.04223	0.03318	0.0263	0.02168	1	Cluster 6 (undiff SPG)	0.337	0.075	0.262	0.262	0.58	0	0	undiff SPG	no	no	no
AEN	ENSG00000181026	apoptosis enhancing nuclease [Source:HGNC Symbol;Acc:HGNC:25722]	protein_coding	15:88621337-88632281:1	17	264	80	525	381	523	1927	1016	1241	274	6248	10.34	4.198	3.558	2.699	15.919	13.956	7.79	16.703	12.649	8.862	8.241	0.07538	0.07834	0.04122	0.26071	0.23679	0.07726	0.17186	0.14022	0.10228	0.14619	0	.	.	.	.	.	.	.	.	.	no	no	no
AFAP1	ENSG00000196526	actin filament associated protein 1 [Source:HGNC Symbol;Acc:HGNC:24017]	protein_coding	4:7758714-7939926:-1	17	415	206	409	216	649	2372	3078	6281	1365	15008	24.837	4.198	5.594	6.95	12.401	7.912	9.666	20.56	38.322	44.855	41.053	0.14874	0.11604	0.08506	0.19305	0.126	0.0933	0.21414	0.52822	0.77409	0.97675	1	Cluster 0 (late spermatid 1) | Cluster 5 (late spermatid 2)	0.449 | 0.411	0.188 | 0.239	0.261 | 0.172	0.261	0.477 | 0.544	0.000e+00 | 1.427e-255	0.000e+00 | 7.219e-251	late spermatid	no	no	no
AFAP1-AS1	ENSG00000272620	AFAP1 antisense RNA 1 [Source:HGNC Symbol;Acc:HGNC:28141]	lncRNA	4:7754077-7778928:1	1	31	26	50	18	68	580	365	288	71	1498	2.479	0.247	0.418	0.877	1.516	0.659	1.013	5.027	4.544	2.057	2.135	0.01047	0.00841	0.01405	0.02073	0.00625	0.00982	0.04076	0.0462	0.02312	0.03459	0	.	.	.	.	.	.	.	.	.	no	no	no
AFAP1L1	ENSG00000157510	actin filament associated protein 1 like 1 [Source:HGNC Symbol;Acc:HGNC:26714]	protein_coding	5:149271859-149343637:1	15	455	1213	462	120	294	1782	4187	2600	177	11305	18.709	3.704	6.133	40.924	14.008	4.396	4.379	15.446	52.129	18.567	5.323	0.08632	0.13312	1.13587	0.2246	0.07118	0.0476	0.2115	1.10235	0.2502	0.09235	2	Cluster 7 (endothelia/macrophage) | Cluster 2 (early spermatid 2)	0.409 | 0.521	0.176 | 0.136	0.233 | 0.385	0.385	0.714 | 0.777	7.411e-283 | 0.000e+00	3.748e-278 | 0.000e+00	.	no	no	yes
AFAP1L2	ENSG00000169129	actin filament associated protein 1 like 2 [Source:HGNC Symbol;Acc:HGNC:25901]	protein_coding	10:114294824-114404756:-1	2	175	606	58	20	78	82	356	116	13	1506	2.492	0.494	2.359	20.445	1.759	0.733	1.162	0.711	4.432	0.828	0.391	0.00717	0.04876	0.37718	0.02137	0.01056	0.0067	0.00682	0.04644	0.00917	0.00599	0	.	.	.	.	.	.	.	.	.	no	no	no
AFDN	ENSG00000130396	afadin, adherens junction formation factor [Source:HGNC Symbol;Acc:HGNC:7137]	protein_coding	6:167826911-167972023:1	45	2253	1013	1604	1129	1108	761	438	658	96	9105	15.068	11.111	30.368	34.177	48.636	41.355	16.503	6.596	5.453	4.699	2.887	0.3008	0.89291	0.76371	1.29883	1.16405	0.18207	0.06623	0.06231	0.07207	0.0604	4	Cluster 3 (myoid/Leydig) | Cluster 7 (endothelia/macrophage) | Cluster 6 (undiff SPG) | Cluster 8 (diff SPG/early meiosis)	0.304 | 0.342 | 0.486 | 0.414	0.129 | 0.141 | 0.131 | 0.138	0.175 | 0.201 | 0.355 | 0.276	0.355	0.592 | 0.427 | 0.847 | 0.741	0.000e+00 | 2.469e-156 | 0.000e+00 | 8.000e-295	0.000e+00 | 1.249e-151 | 0.000e+00 | 4.084e-290	.	no	yes	yes
AFDN-DT	ENSG00000198221	AFDN divergent transcript [Source:HGNC Symbol;Acc:HGNC:21236]	lncRNA	6:167822103-167826812:-1	15	260	83	186	73	901	1044	431	252	31	3276	5.421	3.704	3.505	2.8	5.64	2.674	13.42	9.049	5.366	1.8	0.932	0.1126	0.0812	0.04227	0.07504	0.04114	0.11034	0.07603	0.05033	0.01997	0.01821	0	.	.	.	.	.	.	.	.	.	no	no	no
AFF1	ENSG00000172493	AF4/FMR2 family member 1 [Source:HGNC Symbol;Acc:HGNC:7135]	protein_coding	4:86935002-87141039:1	18	776	877	778	157	167	257	467	522	57	4076	6.745	4.444	10.46	29.588	23.59	5.751	2.487	2.228	5.814	3.728	1.714	0.09516	0.23693	0.61306	0.45887	0.10068	0.01818	0.01867	0.05928	0.04137	0.03279	1	Cluster 7 (endothelia/macrophage)	0.296	0.056	0.24	0.24	0.567	0	0	endothelia/macrophage	no	no	yes
AFF2	ENSG00000155966	AF4/FMR2 family member 2 [Source:HGNC Symbol;Acc:HGNC:3776]	protein_coding	X:148500617-149000663:1	4	316	27	64	17	23	399	324	292	49	1515	2.507	0.988	4.259	0.911	1.941	0.623	0.343	3.458	4.034	2.085	1.474	0.02414	0.07887	0.0119	0.02932	0.00767	0.00526	0.0294	0.04183	0.02269	0.02669	0	.	.	.	.	.	.	.	.	.	no	no	no
AFF2-IT1	ENSG00000223516	AFF2 intronic transcript 1 [Source:HGNC Symbol;Acc:HGNC:41334]	lncRNA	X:148546878-148547397:1	0	1	0	0	0	0	0	0	0	0	1	0.002	0	0.013	0	0	0	0	0	0	0	0	0	0.00066	0	0	0	0	0	0	0	0	0	.	.	.	.	.	.	.	.	.	no	no	no
AFF3	ENSG00000144218	AF4/FMR2 family member 3 [Source:HGNC Symbol;Acc:HGNC:6473]	protein_coding	2:99545419-100192428:-1	20	1112	201	928	333	2625	3973	2442	2257	277	14168	23.446	4.938	14.989	6.781	28.138	12.198	39.097	34.437	30.403	16.118	8.331	0.12549	0.39959	0.143	0.52715	0.20087	0.51962	0.41568	0.39939	0.21184	0.15775	0	.	.	.	.	.	.	.	.	.	no	no	no
AFF4	ENSG00000072364	AF4/FMR2 family member 4 [Source:HGNC Symbol;Acc:HGNC:17869]	protein_coding	5:132875395-132963634:-1	112	2117	941	686	632	1019	3939	5641	5459	476	21022	34.789	27.654	28.535	31.748	20.8	23.15	15.177	34.142	70.232	38.985	14.316	0.98014	0.76997	0.61545	0.3785	0.49718	0.16481	0.5672	2.14729	0.717	0.27809	1	Cluster 2 (early spermatid 2)	0.702	0.294	0.408	0.408	1.016	0	0	early spermatid	no	no	no
AFF4-DT	ENSG00000272023	AFF4 divergent transcript [Source:HGNC Symbol;Acc:HGNC:55235]	lncRNA	5:132963770-132964164:1	0	4	5	18	25	88	238	47	58	12	495	0.819	0	0.054	0.169	0.546	0.916	1.311	2.063	0.585	0.414	0.361	0	0.00133	0.00211	0.00753	0.01457	0.00821	0.01679	0.00471	0.0046	0.00659	0	.	.	.	.	.	.	.	.	.	no	no	no
AFG1L	ENSG00000135537	AFG1 like ATPase [Source:HGNC Symbol;Acc:HGNC:16411]	protein_coding	6:108294991-108526796:1	63	334	200	372	423	2139	9796	5765	4112	168	23372	38.678	15.556	4.502	6.748	11.28	15.495	31.859	84.909	71.775	29.365	5.053	0.52288	0.11228	0.11648	0.23753	0.35607	0.52523	4.30409	2.707	0.63814	0.10846	1	Cluster 1 (early spermatid 1) | Cluster 2 (early spermatid 2)	0.849 | 0.718	0.278 | 0.336	0.571 | 0.382	0.571	1.582 | 0.719	0.000e+00 | 0.000e+00	0.000e+00 | 0.000e+00	early spermatid	no	no	no
AFG3L1P	ENSG00000223959	AFG3 like matrix AAA peptidase subunit 1, pseudogene [Source:HGNC Symbol;Acc:HGNC:314]	transcribed_unitary_pseudogene	16:89972586-90002161:1	4	381	182	973	684	835	1599	183	165	26	5032	8.327	0.988	5.135	6.14	29.503	25.055	12.437	13.86	2.278	1.178	0.782	0.03223	0.11481	0.08942	0.54952	0.49992	0.11868	0.14013	0.02269	0.01732	0.01046	2	Cluster 6 (undiff SPG) | Cluster 8 (diff SPG/early meiosis)	0.295 | 0.251	0.071 | 0.075	0.224 | 0.176	0.224	0.502 | 0.446	0.000e+00 | 1.700e-205	0.000e+00 | 8.598e-201	.	no	no	no
AFG3L2	ENSG00000141385	AFG3 like matrix AAA peptidase subunit 2 [Source:HGNC Symbol;Acc:HGNC:315]	protein_coding	18:12328944-12377227:-1	42	942	503	1010	807	677	479	191	211	30	4892	8.096	10.37	12.697	16.97	30.625	29.56	10.083	4.152	2.378	1.507	0.902	0.28933	0.28866	0.26696	0.67819	0.67945	0.10198	0.04044	0.03081	0.02475	0.01549	2	Cluster 6 (undiff SPG) | Cluster 8 (diff SPG/early meiosis)	0.306 | 0.296	0.068 | 0.071	0.238 | 0.225	0.238	0.587 | 0.581	0.000e+00 | 1.549e-278	0.000e+00 | 7.833e-274	.	no	no	no
AFG3L2P1	ENSG00000253606	AFG3L2 pseudogene 1 [Source:HGNC Symbol;Acc:HGNC:24169]	processed_pseudogene	8:43270198-43271960:-1	0	0	0	0	0	0	0	0	0	0	0	0	0	0	0	0	0	0	0	0	0	0	0	0	0	0	0	0	0	0	0	0	0	.	.	.	.	.	.	.	.	.	no	no	no
AFM	ENSG00000079557	afamin [Source:HGNC Symbol;Acc:HGNC:316]	protein_coding	4:73481745-73504001:1	0	1	0	25	0	0	0	0	0	0	26	0.043	0	0.013	0	0.758	0	0	0	0	0	0	0	0.0001	0	0.00749	0	0	0	0	0	0	0	.	.	.	.	.	.	.	.	.	no	no	no
AFMID	ENSG00000183077	arylformamidase [Source:HGNC Symbol;Acc:HGNC:20910]	protein_coding	17:78187317-78207701:1	40	1014	470	377	308	268	385	238	318	58	3476	5.752	9.877	13.668	15.857	11.431	11.282	3.992	3.337	2.963	2.271	1.744	0.28883	0.36062	0.28027	0.18803	0.21985	0.04731	0.03756	0.03596	0.02695	0.03051	0	.	.	.	.	.	.	.	.	.	no	no	no
AFP	ENSG00000081051	alpha fetoprotein [Source:HGNC Symbol;Acc:HGNC:317]	protein_coding	4:73431138-73456174:1	1	2	0	39	0	3	3	1	1	3	53	0.088	0.247	0.027	0	1.183	0	0.045	0.026	0.012	0.007	0.09	0.00327	0.00053	0	0.01561	0	0.00011	0.00041	0.00016	2e-05	0.00092	0	.	.	.	.	.	.	.	.	.	no	no	no
AFTPH	ENSG00000119844	aftiphilin [Source:HGNC Symbol;Acc:HGNC:25951]	protein_coding	2:64524305-64593005:1	37	583	548	1141	486	1956	3998	1393	2083	567	12792	21.169	9.136	7.858	18.489	34.597	17.802	29.133	34.654	17.343	14.875	17.053	0.27058	0.17192	0.30541	0.73035	0.33124	0.29621	0.45999	0.23116	0.20786	0.36418	1	Cluster 6 (undiff SPG)	0.346	0.204	0.142	0.142	0.426	1.27e-153	6.44e-149	undiff SPG	no	no	no
AGA	ENSG00000038002	aspartylglucosaminidase [Source:HGNC Symbol;Acc:HGNC:318]	protein_coding	4:177430774-177442437:-1	50	463	377	1151	743	1367	1586	677	507	32	6953	11.506	12.346	6.241	12.719	34.9	27.216	20.36	13.747	8.429	3.621	0.962	0.3188	0.13229	0.19253	0.66557	0.55839	0.19165	0.12605	0.0805	0.0449	0.01607	2	Cluster 6 (undiff SPG) | Cluster 8 (diff SPG/early meiosis)	0.349 | 0.272	0.102 | 0.108	0.247 | 0.164	0.247	0.563 | 0.454	0.000e+00 | 8.396e-191	0.000e+00 | 4.247e-186	.	no	no	no
AGAP1	ENSG00000157985	ArfGAP with GTPase domain, ankyrin repeat and PH domain 1 [Source:HGNC Symbol;Acc:HGNC:16922]	protein_coding	2:235494043-236131800:1	23	557	147	1010	331	940	1006	1008	449	25	5496	9.095	5.679	7.508	4.96	30.625	12.125	14.001	8.72	12.55	3.206	0.752	0.14647	0.15675	0.06238	0.60975	0.19629	0.11459	0.07794	0.17174	0.04192	0.0141	1	Cluster 6 (undiff SPG)	0.306	0.079	0.227	0.227	0.551	0	0	undiff SPG	no	no	no
AGAP1-IT1	ENSG00000235529	AGAP1 intronic transcript 1 [Source:HGNC Symbol;Acc:HGNC:41427]	lncRNA	2:235505751-235507566:1	1	3	5	10	2	1	2	3	1	1	29	0.048	0.247	0.04	0.169	0.303	0.073	0.015	0.017	0.037	0.007	0.03	0.00398	0.00049	0.00238	0.00557	0.00123	0.00041	5e-05	0.00034	2e-05	0.00034	0	.	.	.	.	.	.	.	.	.	no	no	no
AGAP10P	ENSG00000230869	ArfGAP with GTPase domain, ankyrin repeat and PH domain 10, pseudogene [Source:HGNC Symbol;Acc:HGNC:23659]	unprocessed_pseudogene	10:45678692-45700532:1	5	25	14	35	13	167	1572	2148	509	34	4522	7.483	1.235	0.337	0.472	1.061	0.476	2.487	13.626	26.743	3.635	1.023	0.02707	0.00541	0.00623	0.01495	0.00622	0.02137	0.14521	0.38696	0.04353	0.01703	1	Cluster 2 (early spermatid 2)	0.267	0.045	0.222	0.222	0.402	0	0	early spermatid	no	no	no
AGAP12P	ENSG00000265018	ArfGAP with GTPase domain, ankyrin repeat and PH domain 12, pseudogene [Source:HGNC Symbol;Acc:HGNC:23661]	transcribed_unprocessed_pseudogene	10:48009873-48031640:-1	2	21	12	26	25	103	1154	1632	332	22	3329	5.509	0.494	0.283	0.405	0.788	0.916	1.534	10.003	20.319	2.371	0.662	0.00625	0.00636	0.00688	0.01465	0.00899	0.01527	0.09916	0.28747	0.02706	0.01107	0	.	.	.	.	.	.	.	.	.	no	no	no
AGAP13P	ENSG00000243289	ArfGAP with GTPase domain, ankyrin repeat and PH domain 13, pseudogene [Source:HGNC Symbol;Acc:HGNC:23499]	unprocessed_pseudogene	10:46816516-46832476:1	0	0	0	0	0	0	1	13	3	0	17	0.028	0	0	0	0	0	0	0.009	0.162	0.021	0	0	0	0	0	0	0	2e-05	0.00123	0.0002	0	0	.	.	.	.	.	.	.	.	.	no	no	no
AGAP14P	ENSG00000279058	ArfGAP with GTPase domain, ankyrin repeat and PH domain 14, pseudogene [Source:HGNC Symbol;Acc:HGNC:23660]	unprocessed_pseudogene	10:46337224-46358714:1	0	9	5	19	8	16	584	1310	476	18	2445	4.046	0	0.121	0.169	0.576	0.293	0.238	5.062	16.31	3.399	0.541	0	0.00247	0.00176	0.01035	0.00569	0.00319	0.04783	0.22931	0.03496	0.00809	0	.	.	.	.	.	.	.	.	.	no	no	no
AGAP2	ENSG00000135439	ArfGAP with GTPase domain, ankyrin repeat and PH domain 2 [Source:HGNC Symbol;Acc:HGNC:16921]	protein_coding	12:57723761-57742157:-1	2	36	21	25	23	28	19	33	63	5	255	0.422	0.494	0.485	0.709	0.758	0.842	0.417	0.165	0.411	0.45	0.15	0.00623	0.01176	0.01101	0.01061	0.01108	0.00347	0.00154	0.00508	0.00452	0.00197	0	.	.	.	.	.	.	.	.	.	no	no	no
AGAP2-AS1	ENSG00000255737	AGAP2 antisense RNA 1 [Source:HGNC Symbol;Acc:HGNC:48633]	lncRNA	12:57726271-57728356:1	3	58	459	32	86	43	20	11	20	2	734	1.215	0.741	0.782	15.486	0.97	3.15	0.64	0.173	0.137	0.143	0.06	0.00482	0.01474	0.24065	0.01301	0.04671	0.00592	0.00243	0.00117	0.00112	0.00114	0	.	.	.	.	.	.	.	.	.	no	no	no
AGAP3	ENSG00000133612	ArfGAP with GTPase domain, ankyrin repeat and PH domain 3 [Source:HGNC Symbol;Acc:HGNC:16923]	protein_coding	7:151085831-151144436:1	27	389	312	1206	185	66	64	39	100	19	2407	3.983	6.667	5.243	10.526	36.568	6.777	0.983	0.555	0.486	0.714	0.571	0.19218	0.11053	0.15153	0.78531	0.10007	0.00855	0.0051	0.00688	0.01115	0.01081	1	Cluster 6 (undiff SPG)	0.366	0.021	0.345	0.345	0.787	0	0	undiff SPG	no	no	no
AGAP4	ENSG00000188234	ArfGAP with GTPase domain, ankyrin repeat and PH domain 4 [Source:HGNC Symbol;Acc:HGNC:23459]	protein_coding	10:45825613-45853875:-1	4	158	86	160	115	355	3406	4586	1850	101	10821	17.908	0.988	2.13	2.901	4.851	4.212	5.287	29.522	57.097	13.211	3.038	0.03345	0.04623	0.03281	0.07581	0.07274	0.05154	0.43529	1.37872	0.17291	0.04932	1	Cluster 2 (early spermatid 2)	0.571	0.119	0.452	0.452	1.025	0	0	early spermatid	no	no	no
AGAP5	ENSG00000172650	ArfGAP with GTPase domain, ankyrin repeat and PH domain 5 [Source:HGNC Symbol;Acc:HGNC:23467]	protein_coding	10:73674287-73698109:-1	1	8	4	6	12	19	283	608	452	27	1420	2.35	0.247	0.108	0.135	0.182	0.44	0.283	2.453	7.57	3.228	0.812	0.00216	0.0009	0.00069	0.00367	0.00497	0.00277	0.02395	0.0987	0.03305	0.01129	0	.	.	.	.	.	.	.	.	.	no	no	no
AGAP6	ENSG00000204149	ArfGAP with GTPase domain, ankyrin repeat and PH domain 6 [Source:HGNC Symbol;Acc:HGNC:23466]	protein_coding	10:49982190-50011654:1	3	272	108	214	116	379	2102	3302	904	23	7423	12.284	0.741	3.666	3.644	6.489	4.249	5.645	18.22	41.111	6.456	0.692	0.01897	0.08883	0.05008	0.09373	0.06653	0.05023	0.23849	0.95465	0.09731	0.0109	1	Cluster 2 (early spermatid 2)	0.411	0.079	0.332	0.332	0.816	0	0	early spermatid	no	no	no
AGAP7P	ENSG00000264204	ArfGAP with GTPase domain, ankyrin repeat and PH domain 7, pseudogene [Source:HGNC Symbol;Acc:HGNC:23465]	unprocessed_pseudogene	10:46109621-46131358:1	1	2	0	27	3	7	151	315	57	2	565	0.935	0.247	0.027	0	0.819	0.11	0.104	1.309	3.922	0.407	0.06	0.00082	0.00026	0	0.01239	0.00139	0.00107	0.01243	0.04862	0.00449	0.00163	0	.	.	.	.	.	.	.	.	.	no	no	no
AGAP9	ENSG00000204172	ArfGAP with GTPase domain, ankyrin repeat and PH domain 9 [Source:HGNC Symbol;Acc:HGNC:23463]	protein_coding	10:47501854-47523638:-1	5	88	40	39	102	383	1934	2408	439	14	5452	9.022	1.235	1.186	1.35	1.183	3.736	5.704	16.763	29.98	3.135	0.421	0.02868	0.02318	0.01267	0.02023	0.06195	0.05067	0.18548	0.47002	0.03677	0.00634	1	Cluster 2 (early spermatid 2)	0.3	0.058	0.242	0.242	0.463	0	0	early spermatid	no	no	no
AGBL1	ENSG00000273540	ATP/GTP binding protein like 1 [Source:HGNC Symbol;Acc:HGNC:26504]	protein_coding	15:86079871-87049169:1	1	32	21	61	29	142	892	534	309	20	2041	3.378	0.247	0.431	0.709	1.85	1.062	2.115	7.732	6.648	2.207	0.602	0.00466	0.00912	0.00947	0.0234	0.01395	0.01305	0.07147	0.0641	0.02378	0.00845	0	.	.	.	.	.	.	.	.	.	no	no	no
AGBL1-AS1	ENSG00000260125	AGBL1 antisense RNA 1 [Source:HGNC Symbol;Acc:HGNC:48617]	lncRNA	15:86295649-86317173:-1	24	62	28	77	86	430	3755	3810	2460	84	10816	17.899	5.926	0.836	0.945	2.335	3.15	6.405	32.547	47.435	17.568	2.526	0.19236	0.01837	0.01423	0.04362	0.06161	0.07584	0.39144	0.81174	0.24392	0.04446	1	Cluster 2 (early spermatid 2)	0.474	0.134	0.34	0.34	0.625	0	0	early spermatid	no	no	no
AGBL2	ENSG00000165923	ATP/GTP binding protein like 2 [Source:HGNC Symbol;Acc:HGNC:26296]	protein_coding	11:47659591-47715389:-1	10	76	44	99	127	1515	3925	1556	914	127	8393	13.889	2.469	1.024	1.484	3.002	4.652	22.565	34.021	19.373	6.527	3.82	0.06829	0.02099	0.02245	0.04918	0.07869	0.22104	0.48378	0.27448	0.08652	0.07169	1	Cluster 1 (early spermatid 1)	0.34	0.091	0.249	0.249	0.408	0	0	early spermatid	no	no	no
AGBL3	ENSG00000146856	ATP/GTP binding protein like 3 [Source:HGNC Symbol;Acc:HGNC:27981]	protein_coding	7:134986508-135147963:1	9	196	168	316	334	1338	5908	2379	821	69	11538	19.094	2.222	2.642	5.668	9.582	12.234	19.929	51.209	29.619	5.863	2.075	0.0623	0.05106	0.07996	0.14311	0.21274	0.19541	0.8304	0.46286	0.07751	0.03359	1	Cluster 1 (early spermatid 1)	0.512	0.115	0.397	0.397	0.656	0	0	early spermatid	no	no	no
AGBL4	ENSG00000186094	ATP/GTP binding protein like 4 [Source:HGNC Symbol;Acc:HGNC:25892]	protein_coding	1:48532854-50023954:-1	2	48	16	213	403	850	1783	817	733	53	4918	8.139	0.494	0.647	0.54	6.458	14.762	12.66	15.455	10.172	5.235	1.594	0.01651	0.01312	0.00888	0.08577	0.27267	0.10868	0.13863	0.09022	0.05125	0.02779	0	.	.	.	.	.	.	.	.	.	no	no	no
AGBL4-AS1	ENSG00000230114	AGBL4 antisense RNA 1 [Source:HGNC Symbol;Acc:HGNC:41123]	lncRNA	1:49257411-49269285:1	0	3	1	4	3	3	71	85	148	13	331	0.548	0	0.04	0.034	0.121	0.11	0.045	0.615	1.058	1.057	0.391	0	0.00089	0.00155	0.00141	0.00175	0.00017	0.00482	0.00951	0.01047	0.00538	0	.	.	.	.	.	.	.	.	.	no	no	no
AGBL4-IT1	ENSG00000225623	AGBL4 intronic transcript 1 [Source:HGNC Symbol;Acc:HGNC:41482]	lncRNA	1:49374201-49472085:-1	0	3	1	10	66	157	233	108	49	4	631	1.044	0	0.04	0.034	0.303	2.418	2.338	2.02	1.345	0.35	0.12	0	0.00086	0.00035	0.0031	0.03936	0.01477	0.01389	0.012	0.00349	0.00186	0	.	.	.	.	.	.	.	.	.	no	no	no
AGBL5	ENSG00000084693	ATP/GTP binding protein like 5 [Source:HGNC Symbol;Acc:HGNC:26147]	protein_coding	2:27042364-27070622:1	72	486	248	1628	858	5328	8529	4640	6709	1848	30346	50.219	17.778	6.551	8.367	49.363	31.429	79.357	73.927	57.769	47.911	55.579	0.71545	0.15149	0.12491	1.17698	0.69156	2.62438	2.125	1.25874	0.8893	1.52791	2	Cluster 4 (spermatocyte) | Cluster 1 (early spermatid 1)	0.794 | 0.739	0.466 | 0.446	0.328 | 0.293	0.328	0.779 | 0.587	0.000e+00 | 0.000e+00	0.000e+00 | 0.000e+00	.	no	no	no
AGBL5-AS1	ENSG00000231636	AGBL5 antisense RNA 1 [Source:HGNC Symbol;Acc:HGNC:41133]	lncRNA	2:27049683-27050264:-1	0	5	2	4	6	42	19	1	2	0	81	0.134	0	0.067	0.067	0.121	0.22	0.626	0.165	0.012	0.014	0	0	0.00142	0.00071	0.00099	0.00385	0.00532	0.00119	3e-05	0.00027	0	0	.	.	.	.	.	.	.	.	.	no	no	no
AGBL5-IT1	ENSG00000229122	AGBL5 intronic transcript 1 [Source:HGNC Symbol;Acc:HGNC:41484]	lncRNA	2:27061038-27061815:1	0	24	7	6	4	6	21	7	3	0	78	0.129	0	0.323	0.236	0.182	0.147	0.089	0.182	0.087	0.021	0	0	0.006	0.00383	0.0023	0.0029	0.00055	0.0016	0.00101	0.00038	0	0	.	.	.	.	.	.	.	.	.	no	no	no
AGER	ENSG00000204305	advanced glycosylation end-product specific receptor [Source:HGNC Symbol;Acc:HGNC:320]	protein_coding	6:32180968-32184322:-1	1	44	39	37	20	10	30	36	64	5	286	0.473	0.247	0.593	1.316	1.122	0.733	0.149	0.26	0.448	0.457	0.15	0.00383	0.01247	0.01465	0.01873	0.01181	0.00094	0.0022	0.00455	0.00534	0.0024	0	.	.	.	.	.	.	.	.	.	no	no	no
AGFG1	ENSG00000173744	ArfGAP with FG repeats 1 [Source:HGNC Symbol;Acc:HGNC:5175]	protein_coding	2:227472152-227561217:1	77	773	556	1244	762	3695	6806	4147	7448	2018	27526	45.552	19.012	10.419	18.758	37.72	27.912	55.034	58.993	51.631	53.189	60.692	0.57832	0.22859	0.29765	0.83253	0.62021	1.13643	1.31159	1.00928	1.15747	2.19397	1	Cluster 5 (late spermatid 2)	0.607	0.447	0.16	0.16	0.711	0	0	late spermatid	no	no	no
AGFG2	ENSG00000106351	ArfGAP with FG repeats 2 [Source:HGNC Symbol;Acc:HGNC:5177]	protein_coding	7:100539203-100568220:1	35	365	337	274	361	199	147	192	156	13	2079	3.441	8.642	4.92	11.37	8.308	13.223	2.964	1.274	2.39	1.114	0.391	0.22749	0.10561	0.16613	0.11473	0.23438	0.02518	0.01076	0.03107	0.0142	0.00691	0	.	.	.	.	.	.	.	.	.	no	no	no
AGGF1	ENSG00000164252	angiogenic factor with G-patch and FHA domains 1 [Source:HGNC Symbol;Acc:HGNC:24684]	protein_coding	5:77029251-77065234:1	32	353	271	913	290	1558	2795	566	366	30	7174	11.872	7.901	4.758	9.143	27.683	10.623	23.205	24.226	7.047	2.614	0.902	0.24206	0.09683	0.12542	0.58087	0.18184	0.22921	0.26325	0.07156	0.04122	0.01629	1	Cluster 6 (undiff SPG)	0.277	0.11	0.167	0.167	0.484	2.31e-255	1.17e-250	undiff SPG	no	no	no
AGGF1P1	ENSG00000214273	angiogenic factor with G-patch and FHA domains 1 pseudogene 1 [Source:HGNC Symbol;Acc:HGNC:38051]	processed_pseudogene	4:190041342-190043414:1	2	3	3	4	15	372	328	62	25	3	817	1.352	0.494	0.04	0.101	0.121	0.549	5.541	2.843	0.772	0.179	0.09	0.00827	0.00059	0.00091	0.00258	0.00751	0.04108	0.02225	0.00765	0.0046	0.00265	0	.	.	.	.	.	.	.	.	.	no	no	no
AGGF1P10	ENSG00000282968	angiogenic factor with G-patch and FHA domains 1 pseudogene 10 [Source:HGNC Symbol;Acc:HGNC:51747]	processed_pseudogene	20:29430723-29432913:1	0	6	10	55	19	62	263	60	36	6	517	0.856	0	0.081	0.337	1.668	0.696	0.923	2.28	0.747	0.257	0.18	0	0.00159	0.0038	0.02024	0.00985	0.00552	0.01797	0.01005	0.00237	0.0014	0	.	.	.	.	.	.	.	.	.	no	no	no
AGGF1P2	ENSG00000233435	angiogenic factor with G-patch and FHA domains 1 pseudogene 2 [Source:HGNC Symbol;Acc:HGNC:38052]	processed_pseudogene	10:133640789-133642894:1	5	8	8	21	20	158	160	31	14	2	427	0.707	1.235	0.108	0.27	0.637	0.733	2.353	1.387	0.386	0.1	0.06	0.0295	0.00138	0.00409	0.00859	0.01143	0.01535	0.01057	0.00365	0.002	0.00078	0	.	.	.	.	.	.	.	.	.	no	no	no
AGGF1P3	ENSG00000241532	angiogenic factor with G-patch and FHA domains 1 pseudogene 3 [Source:HGNC Symbol;Acc:HGNC:38053]	processed_pseudogene	3:75653561-75654773:-1	0	1	3	9	5	9	34	7	7	0	75	0.124	0	0.013	0.101	0.273	0.183	0.134	0.295	0.087	0.05	0	0	0.00058	0.00077	0.00405	0.00227	0.00052	0.00217	0.00095	0.00038	0	0	.	.	.	.	.	.	.	.	.	no	no	no
AGGF1P4	ENSG00000261689	angiogenic factor with G-patch and FHA domains 1 pseudogene 4 [Source:HGNC Symbol;Acc:HGNC:38054]	processed_pseudogene	16:35389203-35390003:-1	0	0	0	0	0	0	12	7	0	0	19	0.031	0	0	0	0	0	0	0.104	0.087	0	0	0	0	0	0	0	0	0.00078	0.00057	0	0	0	.	.	.	.	.	.	.	.	.	no	no	no
AGGF1P5	ENSG00000260680	angiogenic factor with G-patch and FHA domains 1 pseudogene 5 [Source:HGNC Symbol;Acc:HGNC:51741]	processed_pseudogene	16:35420291-35421209:1	0	1	0	3	1	1	59	23	6	0	94	0.156	0	0.013	0	0.091	0.037	0.015	0.511	0.286	0.043	0	0	0.00052	0	0.00059	0.00112	8e-05	0.00449	0.00229	0.00039	0	0	.	.	.	.	.	.	.	.	.	no	no	no
AGGF1P6	ENSG00000259836	angiogenic factor with G-patch and FHA domains 1 pseudogene 6 [Source:HGNC Symbol;Acc:HGNC:51744]	processed_pseudogene	16:35489237-35490212:1	0	1	1	1	0	10	105	49	16	2	185	0.306	0	0.013	0.034	0.03	0	0.149	0.91	0.61	0.114	0.06	0	0.00044	0.00045	0.00017	0	0.00167	0.00732	0.00609	0.00112	0.00194	0	.	.	.	.	.	.	.	.	.	no	no	no
AGGF1P7	ENSG00000260994	angiogenic factor with G-patch and FHA domains 1 pseudogene 7 [Source:HGNC Symbol;Acc:HGNC:51740]	processed_pseudogene	16:35547917-35548829:1	0	1	1	1	4	16	448	217	52	4	744	1.231	0	0.013	0.034	0.03	0.147	0.238	3.883	2.702	0.371	0.12	0	0.0004	0.00017	0.00013	0.00063	0.00265	0.03107	0.0215	0.0046	0.00167	0	.	.	.	.	.	.	.	.	.	no	no	no
AGGF1P8	ENSG00000261752	angiogenic factor with G-patch and FHA domains 1 pseudogene 8 [Source:HGNC Symbol;Acc:HGNC:51745]	processed_pseudogene	16:35258630-35259629:1	0	19	5	32	9	27	135	82	84	4	397	0.657	0	0.256	0.169	0.97	0.33	0.402	1.17	1.021	0.6	0.12	0	0.00603	0.00212	0.01397	0.00507	0.00279	0.01213	0.00889	0.00694	0.00104	0	.	.	.	.	.	.	.	.	.	no	no	no
AGGF1P9	ENSG00000260427	angiogenic factor with G-patch and FHA domains 1 pseudogene 9 [Source:HGNC Symbol;Acc:HGNC:51746]	processed_pseudogene	16:35347385-35348297:1	0	1	0	7	1	1	43	6	0	0	59	0.098	0	0.013	0	0.212	0.037	0.015	0.373	0.075	0	0	0	0.00012	0	0.00323	0.00058	3e-05	0.00374	0.00175	0	0	0	.	.	.	.	.	.	.	.	.	no	no	no
AGK	ENSG00000006530	acylglycerol kinase [Source:HGNC Symbol;Acc:HGNC:21869]	protein_coding	7:141551278-141655244:1	16	530	395	289	318	313	649	1089	680	116	4395	7.273	3.951	7.144	13.327	8.763	11.648	4.662	5.625	13.558	4.856	3.489	0.12414	0.1567	0.20742	0.14096	0.18452	0.03721	0.04875	0.17149	0.05464	0.06918	0	.	.	.	.	.	.	.	.	.	no	no	no
AGK-DT	ENSG00000261570	AGK divergent transcript [Source:HGNC Symbol;Acc:HGNC:55356]	lncRNA	7:141500079-141551304:-1	2	11	1	9	16	505	587	362	150	8	1651	2.732	0.494	0.148	0.034	0.273	0.586	7.522	5.088	4.507	1.071	0.241	0.0189	0.00268	7e-05	0.0057	0.00557	0.05555	0.04595	0.03873	0.01287	0.00404	0	.	.	.	.	.	.	.	.	.	no	no	no
AGL	ENSG00000162688	amylo-alpha-1, 6-glucosidase, 4-alpha-glucanotransferase [Source:HGNC Symbol;Acc:HGNC:321]	protein_coding	1:99850361-99924023:1	45	664	255	600	311	244	268	130	126	23	2666	4.412	11.111	8.95	8.603	18.193	11.392	3.634	2.323	1.619	0.9	0.692	0.34931	0.20442	0.11016	0.30877	0.19251	0.03421	0.02158	0.02049	0.01455	0.01297	0	.	.	.	.	.	.	.	.	.	no	no	no
AGMAT	ENSG00000116771	agmatinase [Source:HGNC Symbol;Acc:HGNC:18407]	protein_coding	1:15571699-15585051:-1	1	119	65	296	152	310	832	844	508	40	3167	5.241	0.247	1.604	2.193	8.975	5.568	4.617	7.212	10.508	3.628	1.203	0.01041	0.03505	0.03341	0.12807	0.09253	0.03222	0.06129	0.10894	0.03698	0.01835	0	.	.	.	.	.	.	.	.	.	no	no	no
AGMO	ENSG00000187546	alkylglycerol monooxygenase [Source:HGNC Symbol;Acc:HGNC:33784]	protein_coding	7:15200317-15562015:-1	15	104	14	653	148	568	723	132	99	7	2463	4.076	3.704	1.402	0.472	19.8	5.421	8.46	6.267	1.643	0.707	0.211	0.09423	0.03199	0.00674	0.36346	0.09478	0.06517	0.05933	0.0204	0.01165	0.00386	0	.	.	.	.	.	.	.	.	.	no	no	no
AGO1	ENSG00000092847	argonaute RISC component 1 [Source:HGNC Symbol;Acc:HGNC:3262]	protein_coding	1:35869808-35930532:1	30	961	388	851	651	686	744	876	681	78	5946	9.84	7.407	12.953	13.09	25.804	23.846	10.217	6.449	10.906	4.863	2.346	0.24568	0.29651	0.2192	0.49457	0.50339	0.08732	0.06104	0.13977	0.05913	0.04271	1	Cluster 6 (undiff SPG)	0.258	0.089	0.169	0.169	0.397	2.78e-185	1.41e-180	undiff SPG	no	no	no
AGO2	ENSG00000123908	argonaute RISC catalytic component 2 [Source:HGNC Symbol;Acc:HGNC:3263]	protein_coding	8:140520156-140635633:-1	48	1424	607	483	131	377	795	1208	1183	61	6317	10.454	11.852	19.194	20.479	14.645	4.799	5.615	6.891	15.04	8.448	1.835	0.34154	0.48223	0.34743	0.26319	0.0756	0.04751	0.06142	0.2111	0.10669	0.03221	0	.	.	.	.	.	.	.	.	.	no	no	no
AGO3	ENSG00000126070	argonaute RISC catalytic component 3 [Source:HGNC Symbol;Acc:HGNC:18421]	protein_coding	1:35930718-36072500:1	40	1475	806	981	769	2142	3921	2943	3054	479	16610	27.488	9.877	19.881	27.193	29.745	28.168	31.903	33.986	36.641	21.81	14.406	0.3132	0.51686	0.49766	0.57881	0.55501	0.33878	0.40803	0.57718	0.28127	0.28926	0	.	.	.	.	.	.	.	.	.	no	no	no
AGO4	ENSG00000134698	argonaute RISC component 4 [Source:HGNC Symbol;Acc:HGNC:18424]	protein_coding	1:35808016-35857890:1	10	308	237	171	138	880	479	219	169	44	2655	4.394	2.469	4.152	7.996	5.185	5.055	13.107	4.152	2.727	1.207	1.323	0.07304	0.08744	0.11091	0.08372	0.07827	0.12868	0.03063	0.02669	0.01648	0.02264	0	.	.	.	.	.	.	.	.	.	no	no	no
AGPAT1	ENSG00000204310	1-acylglycerol-3-phosphate O-acyltransferase 1 [Source:HGNC Symbol;Acc:HGNC:324]	protein_coding	6:32168212-32178096:-1	28	341	241	185	319	1686	1987	1197	1986	439	8409	13.916	6.914	4.596	8.131	5.609	11.685	25.112	17.223	14.903	14.183	13.203	0.19453	0.0914	0.09985	0.09335	0.20226	0.26243	0.17215	0.19453	0.16907	0.26593	0	.	.	.	.	.	.	.	.	.	no	no	no
AGPAT2	ENSG00000169692	1-acylglycerol-3-phosphate O-acyltransferase 2 [Source:HGNC Symbol;Acc:HGNC:325]	protein_coding	9:136673143-136687457:-1	53	1101	827	1187	415	262	660	3632	6862	1477	16476	27.266	13.086	14.84	27.901	35.992	15.201	3.902	5.721	45.219	49.004	44.421	0.3741	0.34021	0.55573	0.72689	0.28886	0.06258	0.06876	0.76835	0.8928	1.16714	2	Cluster 2 (early spermatid 2) | Cluster 0 (late spermatid 1) | Cluster 5 (late spermatid 2)	0.452 | 0.49 | 0.444	0.245 | 0.207 | 0.263	0.207 | 0.283 | 0.181	0.283	0.258 | 0.431 | 0.550	0.000e+00 | 0.000e+00 | 1.227e-205	0.000e+00 | 0.000e+00 | 6.208e-201	.	no	no	no
AGPAT3	ENSG00000160216	1-acylglycerol-3-phosphate O-acyltransferase 3 [Source:HGNC Symbol;Acc:HGNC:326]	protein_coding	21:43865223-43987592:1	62	576	337	341	165	1100	2640	5140	7095	673	18129	30.001	15.309	7.764	11.37	10.34	6.044	16.384	22.883	63.994	50.668	20.241	0.50142	0.17234	0.1711	0.20029	0.11108	0.17265	0.29548	1.63444	1.03113	0.42413	2	Cluster 2 (early spermatid 2) | Cluster 0 (late spermatid 1)	0.64 | 0.507	0.248 | 0.238	0.392 | 0.269	0.392	0.865 | 0.461	0.000e+00 | 0.000e+00	0.000e+00 | 0.000e+00	.	no	no	no
AGPAT4	ENSG00000026652	1-acylglycerol-3-phosphate O-acyltransferase 4 [Source:HGNC Symbol;Acc:HGNC:20885]	protein_coding	6:161129967-161274061:-1	12	431	269	325	161	610	524	2672	2889	262	8155	13.496	2.963	5.809	9.076	9.854	5.897	9.085	4.542	33.267	20.631	7.88	0.08125	0.13109	0.13554	0.15007	0.09121	0.08343	0.04373	0.59357	0.26259	0.14961	1	Cluster 2 (early spermatid 2)	0.333	0.105	0.228	0.228	0.482	0	0	early spermatid	no	no	no
AGPAT5	ENSG00000155189	1-acylglycerol-3-phosphate O-acyltransferase 5 [Source:HGNC Symbol;Acc:HGNC:20886]	protein_coding	8:6708642-6761503:1	132	733	554	706	485	2320	4397	2492	4193	321	16333	27.029	32.593	9.88	18.691	21.407	17.766	34.555	38.112	31.026	29.944	9.654	1.29229	0.21474	0.28189	0.39007	0.32399	0.59414	0.75941	0.51353	0.49989	0.18669	2	Cluster 9 (Sertoli) | Cluster 1 (early spermatid 1)	0.326 | 0.381	0.27 | 0.244	0.056 | 0.137	0.137	0.627 | 0.302	2.307e-47 | 2.709e-199	1.167e-42 | 1.370e-194	.	yes	no	no
AGPAT5P1	ENSG00000234652	1-acylglycerol-3-phosphate O-acyltransferase 5 pseudogene 1 [Source:HGNC Symbol;Acc:HGNC:37709]	processed_pseudogene	Y:3293808-3294826:1	0	0	0	9	0	0	1	0	0	0	10	0.017	0	0	0	0.273	0	0	0.009	0	0	0	0	0	0	0.00323	0	0	5e-05	0	0	0	0	.	.	.	.	.	.	.	.	.	no	no	no
AGPS	ENSG00000018510	alkylglycerone phosphate synthase [Source:HGNC Symbol;Acc:HGNC:327]	protein_coding	2:177392746-177567024:1	78	830	474	580	793	2987	7871	4386	2008	130	20137	33.325	19.259	11.187	15.992	17.586	29.048	44.489	68.224	54.607	14.34	3.91	0.64628	0.26582	0.25704	0.32236	0.61421	0.60413	1.89502	1.17782	0.22827	0.07888	1	Cluster 1 (early spermatid 1) | Cluster 2 (early spermatid 2)	0.682 | 0.546	0.251 | 0.301	0.431 | 0.245	0.431	0.983 | 0.383	0.000e+00 | 0.000e+00	0.000e+00 | 0.000e+00	early spermatid	no	no	no
AGR2	ENSG00000106541	anterior gradient 2, protein disulphide isomerase family member [Source:HGNC Symbol;Acc:HGNC:328]	protein_coding	7:16791811-16833433:-1	4	7	4	59	12	173	1457	278	79	1	2074	3.432	0.988	0.094	0.135	1.789	0.44	2.577	12.629	3.461	0.564	0.03	0.02667	0.00188	0.00121	0.0203	0.00588	0.02497	0.12096	0.02849	0.00926	0.00032	0	.	.	.	.	.	.	.	.	.	no	no	no
AGR3	ENSG00000173467	anterior gradient 3, protein disulphide isomerase family member [Source:HGNC Symbol;Acc:HGNC:24167]	protein_coding	7:16859412-16881987:-1	0	1	0	23	5	5	3	2	2	0	41	0.068	0	0.013	0	0.697	0.183	0.074	0.026	0.025	0.014	0	0	0.0001	0	0.00817	0.00153	0.00023	0.00017	0.00028	9e-05	0	0	.	.	.	.	.	.	.	.	.	no	no	no
AGRN	ENSG00000188157	agrin [Source:HGNC Symbol;Acc:HGNC:329]	protein_coding	1:1020120-1056118:1	10	197	353	192	117	42	58	73	47	10	1099	1.819	2.469	2.655	11.91	5.822	4.286	0.626	0.503	0.909	0.336	0.301	0.04056	0.05909	0.16087	0.08109	0.06523	0.00583	0.00529	0.0106	0.00404	0.00511	0	.	.	.	.	.	.	.	.	.	no	no	no
AGRP	ENSG00000159723	agouti related neuropeptide [Source:HGNC Symbol;Acc:HGNC:330]	protein_coding	16:67482571-67483547:-1	2	72	2	15	0	0	1	1	5	1	99	0.164	0.494	0.97	0.067	0.455	0	0	0.009	0.012	0.036	0.03	0.00385	0.02377	0.00037	0.00798	0	0	4e-05	0.00027	0.00043	0.00128	0	.	.	.	.	.	.	.	.	.	no	no	no
AGT	ENSG00000135744	angiotensinogen [Source:HGNC Symbol;Acc:HGNC:333]	protein_coding	1:230690776-230745576:-1	13	237	67	108	58	136	335	2235	3031	147	6367	10.537	3.21	3.195	2.26	3.275	2.125	2.026	2.904	27.826	21.645	4.421	0.08887	0.0873	0.03538	0.04567	0.03189	0.01974	0.02666	0.35095	0.2722	0.07954	1	Cluster 2 (early spermatid 2)	0.278	0.079	0.199	0.199	0.289	0	0	early spermatid	no	no	no
AGTPBP1	ENSG00000135049	ATP/GTP binding protein 1 [Source:HGNC Symbol;Acc:HGNC:17258]	protein_coding	9:85546539-85742029:-1	23	191	321	505	766	1452	3593	1998	2631	338	11818	19.557	5.679	2.574	10.83	15.312	28.059	21.626	31.143	24.875	18.789	10.165	0.1443	0.05009	0.16312	0.2977	0.62249	0.20237	0.38787	0.31963	0.27126	0.20318	1	Cluster 8 (diff SPG/early meiosis)	0.281	0.192	0.089	0.089	0.369	3.24e-112	1.64e-107	diff SPG/early meiosis	no	no	no
AGTR1	ENSG00000144891	angiotensin II receptor type 1 [Source:HGNC Symbol;Acc:HGNC:336]	protein_coding	3:148697784-148743008:1	2	625	27	141	8	12	158	28	36	2	1039	1.719	0.494	8.424	0.911	4.275	0.293	0.179	1.37	0.349	0.257	0.06	0.00332	0.25347	0.01596	0.05423	0.00429	0.00315	0.00879	0.0034	0.00299	0.00194	0	.	.	.	.	.	.	.	.	.	no	no	no
AGTR2	ENSG00000180772	angiotensin II receptor type 2 [Source:HGNC Symbol;Acc:HGNC:338]	protein_coding	X:116170744-116174974:1	0	1	0	22	0	0	0	0	0	0	23	0.038	0	0.013	0	0.667	0	0	0	0	0	0	0	0.00019	0	0.00822	0	0	0	0	0	0	0	.	.	.	.	.	.	.	.	.	no	no	no
AGTRAP	ENSG00000177674	angiotensin II receptor associated protein [Source:HGNC Symbol;Acc:HGNC:13539]	protein_coding	1:11736084-11754802:1	51	1198	735	710	627	398	676	1453	684	126	6658	11.018	12.593	16.148	24.798	21.528	22.967	5.928	5.859	18.09	4.885	3.789	0.37802	0.36868	0.44644	0.38793	0.49374	0.05285	0.05352	0.23309	0.05846	0.06714	0	.	.	.	.	.	.	.	.	.	no	no	no
AGXT	ENSG00000172482	alanine--glyoxylate and serine--pyruvate aminotransferase [Source:HGNC Symbol;Acc:HGNC:341]	protein_coding	2:240868824-240880502:1	1	135	86	98	39	72	59	44	62	10	606	1.003	0.247	1.82	2.901	2.971	1.429	1.072	0.511	0.548	0.443	0.301	0.01012	0.04635	0.04512	0.03769	0.02414	0.00927	0.00508	0.00583	0.00503	0.00626	0	.	.	.	.	.	.	.	.	.	no	no	no
AGXT2	ENSG00000113492	alanine--glyoxylate aminotransferase 2 [Source:HGNC Symbol;Acc:HGNC:14412]	protein_coding	5:34998101-35048135:-1	0	43	0	30	2	3	1	4	2	1	86	0.142	0	0.58	0	0.91	0.073	0.045	0.009	0.05	0.014	0.03	0	0.01121	0	0.00839	0.0006	0.0002	6e-05	0.00096	0.00027	0.00072	0	.	.	.	.	.	.	.	.	.	no	no	no
AHCTF1	ENSG00000153207	AT-hook containing transcription factor 1 [Source:HGNC Symbol;Acc:HGNC:24618]	protein_coding	1:246839098-246931948:-1	63	811	554	489	723	3648	3199	2507	1472	122	13588	22.487	15.556	10.931	18.691	14.827	26.484	54.334	27.728	31.213	10.512	3.669	0.55911	0.24366	0.28493	0.29263	0.60124	1.35563	0.37499	0.4766	0.17733	0.07627	1	Cluster 4 (spermatocyte)	0.543	0.185	0.358	0.358	0.852	0	0	spermatocyte	no	no	no
AHCTF1P1	ENSG00000226121	AT-hook containing transcription factor 1 pseudogene 1 [Source:HGNC Symbol;Acc:HGNC:24620]	processed_pseudogene	2:161500885-161507705:-1	1	3	7	6	17	548	565	200	37	4	1388	2.297	0.247	0.04	0.236	0.182	0.623	8.162	4.897	2.49	0.264	0.12	0.01017	0.00084	0.00197	0.00404	0.01497	0.07775	0.06102	0.04196	0.0033	0.00291	0	.	.	.	.	.	.	.	.	.	no	no	no
AHCY	ENSG00000101444	adenosylhomocysteinase [Source:HGNC Symbol;Acc:HGNC:343]	protein_coding	20:34280268-34311802:-1	114	1607	595	1743	815	3710	5496	2459	4569	1371	22479	37.2	28.148	21.661	20.074	52.85	29.853	55.258	47.638	30.615	32.629	41.233	0.85659	0.51396	0.31042	1.51897	0.61744	0.9185	0.70831	0.36213	0.49206	1.06326	2	Cluster 6 (undiff SPG) | Cluster 5 (late spermatid 2)	0.529 | 0.412	0.363 | 0.37	0.166 | 0.042	0.166	0.652 | 0.341	0.000e+00 | 2.286e-130	0.000e+00 | 1.156e-125	.	no	no	no
AHCYL1	ENSG00000168710	adenosylhomocysteinase like 1 [Source:HGNC Symbol;Acc:HGNC:344]	protein_coding	1:109984765-110023742:1	104	2301	879	691	472	1606	3612	1058	938	178	11839	19.592	25.679	31.015	29.656	20.952	17.289	23.92	31.308	13.172	6.699	5.353	0.8406	0.8446	0.5473	0.3554	0.31668	0.23107	0.35211	0.12962	0.0864	0.1013	3	Cluster 9 (Sertoli) | Cluster 3 (myoid/Leydig) | Cluster 7 (endothelia/macrophage)	0.257 | 0.31 | 0.297	0.196 | 0.18 | 0.191	0.061 | 0.130 | 0.106	0.13	0.499 | 0.584 | 0.259	2.798e-34 | 0.000e+00 | 7.355e-58	1.415e-29 | 0.000e+00 | 3.720e-53	.	yes	yes	yes
AHCYL2	ENSG00000158467	adenosylhomocysteinase like 2 [Source:HGNC Symbol;Acc:HGNC:22204]	protein_coding	7:129225023-129430211:1	35	173	125	143	182	480	995	2679	1907	164	6883	11.391	8.642	2.332	4.217	4.336	6.667	7.149	8.624	33.354	13.619	4.932	0.26519	0.04555	0.0485	0.07288	0.12279	0.0684	0.08264	0.47082	0.17007	0.09485	1	Cluster 2 (early spermatid 2)	0.334	0.08	0.254	0.254	0.418	0	0	early spermatid	no	no	no
AHCYP2	ENSG00000238181	adenosylhomocysteinase pseudogene 2 [Source:HGNC Symbol;Acc:HGNC:44994]	processed_pseudogene	9:120720673-120721972:1	0	1	0	0	0	0	1	1	0	0	3	0.005	0	0.013	0	0	0	0	0.009	0.012	0	0	0	4e-05	0	0	0	0	4e-05	4e-05	0	0	0	.	.	.	.	.	.	.	.	.	no	no	no
AHCYP4	ENSG00000232992	adenosylhomocysteinase pseudogene 4 [Source:HGNC Symbol;Acc:HGNC:44996]	processed_pseudogene	2:138901433-138902747:-1	0	0	0	0	1	0	0	3	3	0	7	0.012	0	0	0	0	0.037	0	0	0.037	0.021	0	0	0	0	0	0.00015	0	0	0.00023	0.00026	0	0	.	.	.	.	.	.	.	.	.	no	no	no
AHCYP5	ENSG00000213107	adenosylhomocysteinase pseudogene 5 [Source:HGNC Symbol;Acc:HGNC:44997]	processed_pseudogene	2:195582794-195584031:-1	0	0	0	0	2	0	2	4	0	0	8	0.013	0	0	0	0	0.073	0	0.017	0.05	0	0	0	0	0	0	0.00199	0	9e-05	0.00031	0	0	0	.	.	.	.	.	.	.	.	.	no	no	no
AHDC1	ENSG00000126705	AT-hook DNA binding motif containing 1 [Source:HGNC Symbol;Acc:HGNC:25230]	protein_coding	1:27534035-27604431:-1	43	1598	583	489	325	526	968	619	641	68	5860	9.698	10.617	21.539	19.669	14.827	11.905	7.834	8.39	7.707	4.578	2.045	0.28006	0.55112	0.32142	0.22559	0.22866	0.07926	0.08358	0.08552	0.06637	0.03689	0	.	.	.	.	.	.	.	.	.	no	no	no
AHI1	ENSG00000135541	Abelson helper integration site 1 [Source:HGNC Symbol;Acc:HGNC:21575]	protein_coding	6:135283407-135498434:-1	69	2588	946	2195	1484	4094	7473	5327	7462	1717	33355	55.199	17.037	34.883	31.916	66.555	54.359	60.977	64.774	66.322	53.289	51.639	0.63267	1.0857	0.67976	2.20333	1.77075	1.41581	1.86998	2.25354	1.39057	1.81514	2	Cluster 6 (undiff SPG) | Cluster 2 (early spermatid 2)	0.666 | 0.663	0.545 | 0.535	0.121 | 0.128	0.128	0.316 | 0.375	2.066e-71 | 1.385e-134	1.045e-66 | 7.004e-130	.	no	no	no
AHNAK	ENSG00000124942	AHNAK nucleoprotein [Source:HGNC Symbol;Acc:HGNC:347]	protein_coding	11:62433542-62556235:-1	18	4783	1978	313	157	157	888	687	899	102	9982	16.519	4.444	64.47	66.734	9.491	5.751	2.338	7.697	8.553	6.42	3.068	0.08232	2.88445	2.87612	0.1567	0.10178	0.03019	0.07465	0.1028	0.08851	0.05876	2	Cluster 3 (myoid/Leydig) | Cluster 7 (endothelia/macrophage)	0.645 | 0.667	0.098 | 0.139	0.547 | 0.528	0.547	1.648 | 1.424	0.000e+00 | 0.000e+00	0.000e+00 | 0.000e+00	.	no	yes	yes
AHNAK2	ENSG00000185567	AHNAK nucleoprotein 2 [Source:HGNC Symbol;Acc:HGNC:20125]	protein_coding	14:104937244-104978374:-1	4	33	255	185	68	29	253	1812	281	4	2924	4.839	0.988	0.445	8.603	5.609	2.491	0.432	2.193	22.56	2.007	0.12	0.06057	0.0116	0.13572	0.07749	0.03832	0.00572	0.02986	0.50656	0.03121	0.00283	0	.	.	.	.	.	.	.	.	.	no	no	no
AHR	ENSG00000106546	aryl hydrocarbon receptor [Source:HGNC Symbol;Acc:HGNC:348]	protein_coding	7:16916359-17346152:1	26	247	749	195	98	228	485	263	138	11	2440	4.038	6.42	3.329	25.27	5.913	3.59	3.396	4.204	3.274	0.986	0.331	0.16733	0.0781	0.44819	0.08461	0.05214	0.02386	0.03926	0.03549	0.01121	0.00435	1	Cluster 7 (endothelia/macrophage)	0.253	0.029	0.224	0.224	0.482	0	0	endothelia/macrophage	no	no	yes
AHRR	ENSG00000063438	aryl-hydrocarbon receptor repressor [Source:HGNC Symbol;Acc:HGNC:346]	protein_coding	5:321714-438291:1	30	160	56	180	338	4724	8345	4132	4604	347	22916	37.923	7.407	2.157	1.889	5.458	12.381	70.36	72.332	51.444	32.879	10.436	0.257	0.05341	0.03242	0.10105	0.27447	2.54516	2.1135	0.96756	0.56106	0.19134	2	Cluster 4 (spermatocyte) | Cluster 1 (early spermatid 1)	0.704 | 0.723	0.339 | 0.298	0.365 | 0.425	0.425	0.987 | 0.859	0.000e+00 | 0.000e+00	0.000e+00 | 0.000e+00	.	no	no	no
AHSA1	ENSG00000100591	activator of HSP90 ATPase activity 1 [Source:HGNC Symbol;Acc:HGNC:1189]	protein_coding	14:77457870-77469472:1	270	2123	791	1906	1288	4029	4034	1123	1322	127	17013	28.155	66.667	28.616	26.687	57.793	47.179	60.009	34.966	13.982	9.441	3.82	3.7187	0.72966	0.50073	1.60023	1.13523	1.04958	0.43894	0.16931	0.14634	0.08666	4	Cluster 9 (Sertoli) | Cluster 6 (undiff SPG) | Cluster 8 (diff SPG/early meiosis) | Cluster 4 (spermatocyte)	0.667 | 0.578 | 0.472 | 0.6	0.279 | 0.264 | 0.273 | 0.242	0.388 | 0.314 | 0.199 | 0.358	0.388	1.636 | 0.815 | 0.499 | 0.474	1.811e-237 | 0.000e+00 | 1.679e-150 | 0.000e+00	9.158e-233 | 0.000e+00 | 8.493e-146 | 0.000e+00	.	yes	no	no
AHSA2P	ENSG00000173209	activator of HSP90 ATPase homolog 2, pseudogene [Source:HGNC Symbol;Acc:HGNC:20437]	transcribed_unitary_pseudogene	2:61177418-61191203:1	26	911	434	297	295	1566	2404	1068	1448	148	8597	14.227	6.42	12.279	14.642	9.005	10.806	23.324	20.837	13.297	10.341	4.451	0.20504	0.30593	0.23617	0.15007	0.18592	0.22105	0.20203	0.13112	0.1171	0.0768	0	.	.	.	.	.	.	.	.	.	no	no	no
AHSG	ENSG00000145192	alpha 2-HS glycoprotein [Source:HGNC Symbol;Acc:HGNC:349]	protein_coding	3:186613060-186621318:1	1	6	6	25	18	37	44	478	948	97	1660	2.747	0.247	0.081	0.202	0.758	0.659	0.551	0.381	5.951	6.77	2.917	0.01087	0.00114	0.00224	0.01118	0.00948	0.00436	0.00229	0.04929	0.07007	0.05303	0	.	.	.	.	.	.	.	.	.	no	no	no
AHSP	ENSG00000169877	alpha hemoglobin stabilizing protein [Source:HGNC Symbol;Acc:HGNC:18075]	protein_coding	16:31527900-31528803:1	2	9	10	81	52	1102	1036	1090	829	119	4330	7.166	0.494	0.121	0.337	2.456	1.905	16.413	8.98	13.571	5.92	3.579	0.01211	0.00187	0.00627	0.03585	0.03449	0.1535	0.08364	0.14908	0.07072	0.05976	0	.	.	.	.	.	.	.	.	.	no	no	no
AICDA	ENSG00000111732	activation induced cytidine deaminase [Source:HGNC Symbol;Acc:HGNC:13203]	protein_coding	12:8602170-8612867:-1	1	133	95	172	63	151	315	167	43	7	1147	1.898	0.247	1.793	3.205	5.215	2.308	2.249	2.73	2.079	0.307	0.211	0.00421	0.0423	0.05054	0.06257	0.03755	0.02178	0.02824	0.02422	0.00404	0.00475	0	.	.	.	.	.	.	.	.	.	no	no	no
AIDA	ENSG00000186063	axin interactor, dorsalization associated [Source:HGNC Symbol;Acc:HGNC:25761]	protein_coding	1:222668013-222713210:-1	168	1584	923	359	439	2493	2615	805	653	130	10169	16.829	41.481	21.351	31.14	10.885	16.081	37.131	22.666	10.022	4.663	3.91	1.63035	0.49638	0.60214	0.1786	0.28559	0.43657	0.22918	0.10671	0.06701	0.0795	2	Cluster 9 (Sertoli) | Cluster 7 (endothelia/macrophage)	0.415 | 0.311	0.167 | 0.161	0.248 | 0.150	0.248	1.084 | 0.379	3.520e-121 | 6.591e-122	1.780e-116 | 3.334e-117	.	yes	no	yes
AIDAP1	ENSG00000230154	AIDA pseudogene 1 [Source:HGNC Symbol;Acc:HGNC:54663]	processed_pseudogene	2:11308025-11308941:1	0	0	0	1	0	0	0	0	2	0	3	0.005	0	0	0	0.03	0	0	0	0	0.014	0	0	0	0	0.0002	0	0	0	0	0.00012	0	0	.	.	.	.	.	.	.	.	.	no	no	no
AIDAP2	ENSG00000251429	AIDA pseudogene 2 [Source:HGNC Symbol;Acc:HGNC:54664]	transcribed_processed_pseudogene	4:158270378-158278676:1	0	54	32	40	28	40	929	267	28	0	1418	2.347	0	0.728	1.08	1.213	1.026	0.596	8.052	3.324	0.2	0	0	0.01722	0.01315	0.02059	0.0126	0.00419	0.08825	0.04626	0.00295	0	0	.	.	.	.	.	.	.	.	.	no	no	no
AIDAP3	ENSG00000264189	AIDA pseudogene 3 [Source:HGNC Symbol;Acc:HGNC:54665]	processed_pseudogene	18:1927727-1929094:-1	0	0	0	0	0	0	0	0	0	0	0	0	0	0	0	0	0	0	0	0	0	0	0	0	0	0	0	0	0	0	0	0	0	.	.	.	.	.	.	.	.	.	no	no	no
AIF1	ENSG00000204472	allograft inflammatory factor 1 [Source:HGNC Symbol;Acc:HGNC:352]	protein_coding	6:31615217-31617021:1	1	57	572	78	15	31	30	30	60	7	881	1.458	0.247	0.768	19.298	2.365	0.549	0.462	0.26	0.374	0.428	0.211	0.00376	0.03666	2.39583	0.04168	0.01075	0.00525	0.00271	0.00546	0.00993	0.00443	0	.	.	.	.	.	.	.	.	.	no	no	no
AIF1L	ENSG00000126878	allograft inflammatory factor 1 like [Source:HGNC Symbol;Acc:HGNC:28904]	protein_coding	9:131096476-131123152:1	3	1220	993	711	119	59	104	317	244	40	3810	6.305	0.741	16.444	33.502	21.559	4.359	0.879	0.901	3.947	1.742	1.203	0.01387	0.41282	0.68908	0.36208	0.06074	0.00892	0.00936	0.05246	0.01981	0.02023	1	Cluster 7 (endothelia/macrophage)	0.335	0.049	0.286	0.286	0.628	0	0	endothelia/macrophage	no	no	yes
AIFM1	ENSG00000156709	apoptosis inducing factor mitochondria associated 1 [Source:HGNC Symbol;Acc:HGNC:8768]	protein_coding	X:130124666-130165879:-1	141	910	451	1046	768	352	506	422	273	39	4908	8.122	34.815	12.266	15.216	31.716	28.132	5.243	4.386	5.254	1.95	1.173	1.36267	0.29409	0.24332	0.61479	0.57031	0.04309	0.04176	0.06569	0.03009	0.03077	3	Cluster 9 (Sertoli) | Cluster 6 (undiff SPG) | Cluster 8 (diff SPG/early meiosis)	0.348 | 0.317 | 0.281	0.079 | 0.068 | 0.072	0.269 | 0.249 | 0.209	0.269	1.053 | 0.528 | 0.479	1.313e-96 | 0.000e+00 | 2.182e-232	6.643e-92 | 0.000e+00 | 1.104e-227	.	yes	no	no
AIFM1P1	ENSG00000225509	AIFM1 pseudogene 1 [Source:HGNC Symbol;Acc:HGNC:44884]	processed_pseudogene	10:18735745-18738631:1	0	0	1	8	15	0	1	3	3	0	31	0.051	0	0	0.034	0.243	0.549	0	0.009	0.037	0.021	0	0	0	0.00011	0.00405	0.00811	0	0.00013	0.00049	0.00033	0	0	.	.	.	.	.	.	.	.	.	no	no	no
AIFM2	ENSG00000042286	apoptosis inducing factor mitochondria associated 2 [Source:HGNC Symbol;Acc:HGNC:21411]	protein_coding	10:70098223-70132934:-1	20	248	51	287	170	1399	1997	904	1054	280	6410	10.608	4.938	3.343	1.721	8.702	6.227	20.837	17.31	11.255	7.527	8.421	0.11652	0.07026	0.02847	0.12637	0.10078	0.19374	0.17726	0.11435	0.09113	0.1711	0	.	.	.	.	.	.	.	.	.	no	no	no
AIFM3	ENSG00000183773	apoptosis inducing factor mitochondria associated 3 [Source:HGNC Symbol;Acc:HGNC:26398]	protein_coding	22:20965108-20981360:1	0	12	10	69	46	32	17	10	14	3	213	0.352	0	0.162	0.337	2.092	1.685	0.477	0.147	0.125	0.1	0.09	0	0.00295	0.00267	0.02272	0.02619	0.00489	0.00165	0.00113	0.00095	0.00121	0	.	.	.	.	.	.	.	.	.	no	no	no
AIG1	ENSG00000146416	androgen induced 1 [Source:HGNC Symbol;Acc:HGNC:21607]	protein_coding	6:143060496-143341058:1	100	2090	722	1196	325	414	2885	783	610	86	9211	15.243	24.691	28.171	24.359	36.264	11.905	6.166	25.007	9.749	4.356	2.586	0.97753	0.73146	0.44813	0.73182	0.20838	0.05871	0.27882	0.10931	0.05166	0.04224	2	Cluster 3 (myoid/Leydig) | Cluster 6 (undiff SPG)	0.282 | 0.363	0.134 | 0.14	0.148 | 0.223	0.223	0.541 | 0.495	0.000e+00 | 2.198e-239	0.000e+00 | 1.112e-234	.	no	yes	no
AIM2	ENSG00000163568	absent in melanoma 2 [Source:HGNC Symbol;Acc:HGNC:357]	protein_coding	1:159062484-159147096:-1	2	22	9	66	37	239	1921	876	1116	272	4560	7.546	0.494	0.297	0.304	2.001	1.355	3.56	16.651	10.906	7.97	8.18	0.01315	0.00513	0.00414	0.03099	0.02049	0.02745	0.15291	0.10378	0.08876	0.15839	0	.	.	.	.	.	.	.	.	.	no	no	no
AIMP1	ENSG00000164022	aminoacyl tRNA synthetase complex interacting multifunctional protein 1 [Source:HGNC Symbol;Acc:HGNC:10648]	protein_coding	4:106315544-106349456:1	102	2503	1213	1789	1299	3323	5003	2184	890	53	18359	30.382	25.185	33.738	40.924	54.245	47.582	49.494	43.365	27.191	6.356	1.594	0.83387	0.93158	0.93943	1.40025	1.24974	0.84968	0.62706	0.34679	0.09788	0.03349	5	Cluster 3 (myoid/Leydig) | Cluster 7 (endothelia/macrophage) | Cluster 6 (undiff SPG) | Cluster 8 (diff SPG/early meiosis) | Cluster 4 (spermatocyte)	0.337 | 0.409 | 0.542 | 0.476 | 0.495	0.299 | 0.298 | 0.29 | 0.296 | 0.28	0.038 | 0.111 | 0.252 | 0.180 | 0.215	0.252	0.332 | 0.309 | 0.643 | 0.535 | 0.255	2.470e-263 | 7.747e-57 | 4.909e-289 | 9.497e-158 | 2.011e-286	1.250e-258 | 3.918e-52 | 2.483e-284 | 4.803e-153 | 1.017e-281	.	no	yes	yes
AIMP1P1	ENSG00000234187	aminoacyl tRNA synthetase complex interacting multifunctional protein 1 pseudogene 1 [Source:HGNC Symbol;Acc:HGNC:16543]	processed_pseudogene	20:14127400-14128336:1	0	64	10	121	97	194	117	11	10	2	626	1.036	0	0.863	0.337	3.669	3.553	2.889	1.014	0.137	0.071	0.06	0	0.01816	0.00522	0.04912	0.05548	0.0187	0.00804	0.00082	0.00097	0.00111	0	.	.	.	.	.	.	.	.	.	no	no	no
AIMP1P2	ENSG00000227177	aminoacyl tRNA synthetase complex interacting multifunctional protein 1 pseudogene 2 [Source:HGNC Symbol;Acc:HGNC:43693]	processed_pseudogene	1:172885947-172886258:-1	0	0	0	3	0	0	0	4	0	0	7	0.012	0	0	0	0.091	0	0	0	0.05	0	0	0	0	0	0.00114	0	0	0	0.00072	0	0	0	.	.	.	.	.	.	.	.	.	no	no	no
AIMP2	ENSG00000106305	aminoacyl tRNA synthetase complex interacting multifunctional protein 2 [Source:HGNC Symbol;Acc:HGNC:20609]	protein_coding	7:6009255-6023834:1	7	121	64	147	70	769	851	296	245	21	2591	4.288	1.728	1.631	2.159	4.457	2.564	11.454	7.376	3.685	1.75	0.632	0.04718	0.03654	0.03362	0.06468	0.04246	0.11256	0.07547	0.03852	0.02178	0.01061	0	.	.	.	.	.	.	.	.	.	no	no	no
AIP	ENSG00000110711	aryl hydrocarbon receptor interacting protein [Source:HGNC Symbol;Acc:HGNC:358]	protein_coding	11:67468174-67491154:1	68	1677	1099	1424	495	2472	2977	1104	930	51	12297	20.35	16.79	22.604	37.078	43.178	18.132	36.819	25.804	13.745	6.641	1.534	0.48662	0.54582	0.74364	0.91119	0.34173	0.43833	0.28051	0.11768	0.07685	0.03176	2	Cluster 7 (endothelia/macrophage) | Cluster 6 (undiff SPG)	0.371 | 0.432	0.195 | 0.19	0.176 | 0.242	0.242	0.438 | 0.584	6.851e-152 | 3.000e-303	3.465e-147 | 1.000e-298	.	no	no	yes
AIPL1	ENSG00000129221	aryl hydrocarbon receptor interacting protein like 1 [Source:HGNC Symbol;Acc:HGNC:359]	protein_coding	17:6393693-6435199:-1	0	39	27	104	34	93	198	897	451	13	1856	3.071	0	0.526	0.911	3.153	1.245	1.385	1.716	11.168	3.221	0.391	0	0.01475	0.01312	0.03967	0.01757	0.01098	0.01587	0.13042	0.03715	0.00812	0	.	.	.	.	.	.	.	.	.	no	no	no
AIRE	ENSG00000160224	autoimmune regulator [Source:HGNC Symbol;Acc:HGNC:360]	protein_coding	21:44285838-44298648:1	0	18	6	32	4	24	26	24	15	1	150	0.248	0	0.243	0.202	0.97	0.147	0.357	0.225	0.299	0.107	0.03	0	0.00417	0.00354	0.01072	0.0021	0.00179	0.00178	0.00255	0.00173	0.00034	0	.	.	.	.	.	.	.	.	.	no	no	no
AIRN	ENSG00000268257	antisense of IGF2R non-protein coding RNA [Source:HGNC Symbol;Acc:HGNC:34515]	lncRNA	6:160003291-160007664:-1	0	11	13	34	11	15	51	18	20	0	173	0.286	0	0.148	0.439	1.031	0.403	0.223	0.442	0.224	0.143	0	0	0.00348	0.00845	0.01274	0.00653	0.00157	0.00294	0.00273	0.00125	0	0	.	.	.	.	.	.	.	.	.	no	no	no
AJAP1	ENSG00000196581	adherens junctions associated protein 1 [Source:HGNC Symbol;Acc:HGNC:30801]	protein_coding	1:4654609-4792534:1	1	214	8	215	37	70	364	394	251	50	1604	2.654	0.247	2.884	0.27	6.519	1.355	1.043	3.155	4.905	1.792	1.504	0.00486	0.05296	0.0032	0.10368	0.01677	0.00775	0.02699	0.03949	0.01756	0.02171	0	.	.	.	.	.	.	.	.	.	no	no	no
AJM1	ENSG00000232434	apical junction component 1 homolog [Source:HGNC Symbol;Acc:HGNC:37284]	protein_coding	9:136844415-136848801:1	5	136	38	89	35	200	254	497	652	188	2094	3.465	1.235	1.833	1.282	2.699	1.282	2.979	2.202	6.188	4.656	5.654	0.02008	0.03913	0.01709	0.04052	0.02082	0.02557	0.01345	0.13382	0.05295	0.11365	0	.	.	.	.	.	.	.	.	.	no	no	no
AJUBA	ENSG00000129474	ajuba LIM protein [Source:HGNC Symbol;Acc:HGNC:20250]	protein_coding	14:22971177-22982551:-1	3	128	132	77	110	757	833	321	504	46	2911	4.817	0.741	1.725	4.453	2.335	4.029	11.275	7.22	3.997	3.599	1.383	0.01056	0.0364	0.07193	0.03635	0.0662	0.08566	0.06433	0.03902	0.03592	0.02658	0	.	.	.	.	.	.	.	.	.	no	no	no
AK1	ENSG00000106992	adenylate kinase 1 [Source:HGNC Symbol;Acc:HGNC:361]	protein_coding	9:127866486-127877675:-1	40	1759	207	141	122	477	2937	1496	3783	744	11706	19.372	9.877	23.709	6.984	4.275	4.469	7.105	25.457	18.625	27.016	22.376	0.2946	0.61681	0.09221	0.06328	0.08069	0.07165	0.27632	0.19548	0.37104	0.41775	0	.	.	.	.	.	.	.	.	.	no	no	no
AK2	ENSG00000004455	adenylate kinase 2 [Source:HGNC Symbol;Acc:HGNC:362]	protein_coding	1:33007940-33080996:-1	77	1591	963	664	1007	4174	6200	3619	2598	162	21055	34.844	19.012	21.445	32.49	20.133	36.886	62.169	53.74	45.057	18.553	4.872	0.6015	0.51166	0.60272	0.36288	0.82668	1.23692	0.90559	0.75651	0.26658	0.09318	2	Cluster 4 (spermatocyte) | Cluster 1 (early spermatid 1)	0.622 | 0.537	0.314 | 0.304	0.308 | 0.233	0.308	0.524 | 0.283	0.000e+00 | 0.000e+00	0.000e+00 | 0.000e+00	.	no	no	no
AK2P2	ENSG00000242272	adenylate kinase 2 pseudogene 2 [Source:HGNC Symbol;Acc:HGNC:33542]	processed_pseudogene	2:31823413-31823817:-1	0	0	0	0	0	0	2	2	0	0	4	0.007	0	0	0	0	0	0	0.017	0.025	0	0	0	0	0	0	0	0	0.0001	0.00011	0	0	0	.	.	.	.	.	.	.	.	.	no	no	no
AK3	ENSG00000147853	adenylate kinase 3 [Source:HGNC Symbol;Acc:HGNC:17376]	protein_coding	9:4709556-4742043:-1	24	3288	965	225	390	222	407	244	151	24	5940	9.83	5.926	44.319	32.557	6.822	14.286	3.307	3.528	3.038	1.078	0.722	0.14456	1.37502	0.62475	0.1041	0.25682	0.03258	0.03309	0.03794	0.01463	0.01589	2	Cluster 3 (myoid/Leydig) | Cluster 7 (endothelia/macrophage)	0.443 | 0.326	0.05 | 0.087	0.393 | 0.239	0.393	1.140 | 0.417	0.000e+00 | 4.499e-287	0.000e+00 | 2.276e-282	.	no	yes	yes
AK3P2	ENSG00000250115	adenylate kinase 3 pseudogene 2 [Source:HGNC Symbol;Acc:HGNC:31099]	processed_pseudogene	8:143057060-143057816:-1	0	1	0	2	3	5	3	0	0	0	14	0.023	0	0.013	0	0.061	0.11	0.074	0.026	0	0	0	0	0.00015	0	0.00061	0.00223	0.00043	7e-05	0	0	0	0	.	.	.	.	.	.	.	.	.	no	no	no
AK3P3	ENSG00000230042	adenylate kinase 3 pseudogene 3 [Source:HGNC Symbol;Acc:HGNC:39062]	processed_pseudogene	7:23129178-23129841:1	1	5	5	6	4	23	83	98	21	0	246	0.407	0.247	0.067	0.169	0.182	0.147	0.343	0.719	1.22	0.15	0	0.01171	0.00104	0.00075	0.00465	0.00111	0.00288	0.00681	0.01588	0.00174	0	0	.	.	.	.	.	.	.	.	.	no	no	no
AK3P5	ENSG00000228816	adenylate kinase 3 pseudogene 5 [Source:HGNC Symbol;Acc:HGNC:39064]	processed_pseudogene	10:32944481-32944999:1	0	0	0	0	0	0	0	0	0	0	0	0	0	0	0	0	0	0	0	0	0	0	0	0	0	0	0	0	0	0	0	0	0	.	.	.	.	.	.	.	.	.	no	no	no
AK4	ENSG00000162433	adenylate kinase 4 [Source:HGNC Symbol;Acc:HGNC:363]	protein_coding	1:65147549-65232145:1	90	397	240	850	170	305	388	338	277	34	3089	5.112	22.222	5.351	8.097	25.773	6.227	4.543	3.363	4.208	1.978	1.023	0.75667	0.10858	0.11798	0.48252	0.10363	0.03499	0.03249	0.05166	0.0307	0.02101	1	Cluster 6 (undiff SPG)	0.258	0.039	0.219	0.219	0.488	0	0	undiff SPG	no	no	no
AK4P1	ENSG00000263535	adenylate kinase 4 pseudogene 1 [Source:HGNC Symbol;Acc:HGNC:364]	processed_pseudogene	17:31345519-31346190:1	2	0	1	0	0	1	0	2	3	1	10	0.017	0.494	0	0.034	0	0	0.015	0	0.025	0.021	0.03	0.01326	0	8e-05	0	0	0.0004	0	0.0001	0.00012	0.00017	0	.	.	.	.	.	.	.	.	.	no	no	no
AK4P3	ENSG00000233381	adenylate kinase 4 pseudogene 3 [Source:HGNC Symbol;Acc:HGNC:21596]	processed_pseudogene	12:31615771-31616439:-1	1	0	0	0	0	3	0	0	0	0	4	0.007	0.247	0	0	0	0	0.045	0	0	0	0	0.00987	0	0	0	0	0.00029	0	0	0	0	0	.	.	.	.	.	.	.	.	.	no	no	no
AK4P4	ENSG00000223621	adenylate kinase 4 pseudogene 4 [Source:HGNC Symbol;Acc:HGNC:39067]	processed_pseudogene	9:5855781-5856426:-1	0	0	0	0	0	0	0	0	0	0	0	0	0	0	0	0	0	0	0	0	0	0	0	0	0	0	0	0	0	0	0	0	0	.	.	.	.	.	.	.	.	.	no	no	no
AK5	ENSG00000154027	adenylate kinase 5 [Source:HGNC Symbol;Acc:HGNC:365]	protein_coding	1:77282019-77559966:1	15	191	47	2089	897	485	3210	4047	1748	67	12796	21.176	3.704	2.574	1.586	63.341	32.857	7.224	27.824	50.386	12.483	2.015	0.10258	0.0688	0.03084	2.04224	0.84186	0.09894	0.47296	0.94463	0.19957	0.03874	3	Cluster 6 (undiff SPG) | Cluster 8 (diff SPG/early meiosis) | Cluster 2 (early spermatid 2)	0.633 | 0.329 | 0.504	0.187 | 0.206 | 0.167	0.446 | 0.123 | 0.337	0.446	1.180 | 0.379 | 0.519	0.000e+00 | 2.145e-72 | 0.000e+00	0.000e+00 | 1.085e-67 | 0.000e+00	.	no	no	no
AK6	ENSG00000085231	adenylate kinase 6 [Source:HGNC Symbol;Acc:HGNC:49151]	protein_coding	5:69350984-69370013:-1	126	1527	642	1338	1032	2916	4617	4252	6058	1536	24044	39.79	31.111	20.582	21.66	40.57	37.802	43.432	40.019	52.938	43.262	46.195	1.05813	0.49479	0.38727	0.8593	0.82806	0.57923	0.53633	0.94609	0.7253	1.21604	1	Cluster 5 (late spermatid 2)	0.462	0.394	0.068	0.068	0.409	3.19e-170	1.61e-165	late spermatid	no	no	no
AK6P1	ENSG00000256614	adenylate kinase 6 pseudogene 1 [Source:HGNC Symbol;Acc:HGNC:51678]	processed_pseudogene	12:34249481-34249958:1	0	0	0	8	0	0	0	0	0	0	8	0.013	0	0	0	0.243	0	0	0	0	0	0	0	0	0	0.00298	0	0	0	0	0	0	0	.	.	.	.	.	.	.	.	.	no	no	no
AK6P2	ENSG00000257173	adenylate kinase 6 pseudogene 2 [Source:HGNC Symbol;Acc:HGNC:51679]	processed_pseudogene	12:38078529-38078999:-1	0	0	0	0	1	0	0	0	1	0	2	0.003	0	0	0	0	0.037	0	0	0	0.007	0	0	0	0	0	0.00022	0	0	0	2e-05	0	0	.	.	.	.	.	.	.	.	.	no	no	no
AK7	ENSG00000140057	adenylate kinase 7 [Source:HGNC Symbol;Acc:HGNC:20091]	protein_coding	14:96392128-96489427:1	4	69	97	142	512	1357	2144	929	429	19	5702	9.436	0.988	0.93	3.273	4.306	18.755	20.211	18.584	11.566	3.064	0.571	0.03683	0.02208	0.04314	0.05793	0.36636	0.19492	0.18523	0.12889	0.03676	0.00905	0	.	.	.	.	.	.	.	.	.	no	no	no
AK8	ENSG00000165695	adenylate kinase 8 [Source:HGNC Symbol;Acc:HGNC:26526]	protein_coding	9:132725578-132878777:-1	9	162	48	215	205	1990	4361	2860	3200	836	13886	22.98	2.222	2.184	1.619	6.519	7.509	29.64	37.8	35.608	22.852	25.143	0.06884	0.04502	0.02158	0.09133	0.111	0.31609	0.45562	0.46002	0.27791	0.52415	1	Cluster 5 (late spermatid 2)	0.251	0.229	0.022	0.022	0.252	1.43e-125	7.22e-121	late spermatid	no	no	no
AK9	ENSG00000155085	adenylate kinase 9 [Source:HGNC Symbol;Acc:HGNC:33814]	protein_coding	6:109492855-109691217:-1	20	431	350	1084	1323	4039	4511	2293	1664	214	15929	26.361	4.938	5.809	11.808	32.868	48.462	60.158	39.1	28.548	11.883	6.436	0.12837	0.13968	0.18299	0.681	1.58092	1.3814	0.61222	0.50741	0.20781	0.14426	2	Cluster 8 (diff SPG/early meiosis) | Cluster 4 (spermatocyte)	0.485 | 0.602	0.253 | 0.221	0.232 | 0.381	0.381	0.803 | 0.743	1.000e-297 | 0.000e+00	9.198e-293 | 0.000e+00	.	no	no	no
AKAIN1	ENSG00000231824	A-kinase anchor inhibitor 1 [Source:HGNC Symbol;Acc:HGNC:28285]	protein_coding	18:5142911-5197503:-1	0	1	1	99	49	139	259	47	36	3	634	1.049	0	0.013	0.034	3.002	1.795	2.07	2.245	0.585	0.257	0.09	0	4e-05	0.00032	0.0474	0.0296	0.01956	0.01809	0.00417	0.00299	0.0012	0	.	.	.	.	.	.	.	.	.	no	no	no
AKAP1	ENSG00000121057	A-kinase anchoring protein 1 [Source:HGNC Symbol;Acc:HGNC:367]	protein_coding	17:57085092-57121346:1	66	659	436	407	431	1252	3244	6047	12276	3202	28020	46.37	16.296	8.883	14.71	12.341	15.788	18.648	28.118	75.286	87.667	96.301	0.7296	0.22494	0.26025	0.25524	0.39794	0.27788	0.48578	2.77927	4.80446	9.12028	2	Cluster 2 (early spermatid 2) | Cluster 0 (late spermatid 1) | Cluster 5 (late spermatid 2)	0.753 | 0.877 | 0.963	0.419 | 0.339 | 0.435	0.334 | 0.538 | 0.528	0.538	0.288 | 1.277 | 1.863	0.000e+00 | 0.000e+00 | 0.000e+00	0.000e+00 | 0.000e+00 | 0.000e+00	.	no	no	no
AKAP1-DT	ENSG00000263004	AKAP1 divergent transcript [Source:HGNC Symbol;Acc:HGNC:55339]	lncRNA	17:57071814-57085024:-1	7	75	63	254	260	471	638	414	344	36	2562	4.24	1.728	1.011	2.126	7.702	9.524	7.015	5.53	5.154	2.457	1.083	0.04433	0.0219	0.03114	0.11508	0.15353	0.05792	0.03938	0.04387	0.02771	0.02036	0	.	.	.	.	.	.	.	.	.	no	no	no
AKAP10	ENSG00000108599	A-kinase anchoring protein 10 [Source:HGNC Symbol;Acc:HGNC:368]	protein_coding	17:19904302-19978343:-1	25	563	415	466	546	1145	1832	972	1035	45	7044	11.657	6.173	7.589	14.001	14.13	20	17.054	15.879	12.102	7.391	1.353	0.1396	0.17318	0.21492	0.22926	0.37591	0.1459	0.15434	0.12651	0.08066	0.02273	0	.	.	.	.	.	.	.	.	.	no	no	no
AKAP11	ENSG00000023516	A-kinase anchoring protein 11 [Source:HGNC Symbol;Acc:HGNC:369]	protein_coding	13:42272152-42323261:1	49	928	454	1120	660	2119	2016	679	947	177	9149	15.141	12.099	12.508	15.317	33.96	24.176	31.561	17.474	8.454	6.763	5.323	0.39104	0.27506	0.23734	0.8868	0.54484	0.44478	0.21013	0.11343	0.1052	0.10175	1	Cluster 6 (undiff SPG)	0.34	0.141	0.199	0.199	0.63	2.45e-268	1.24e-263	undiff SPG	no	no	no
AKAP12	ENSG00000131016	A-kinase anchoring protein 12 [Source:HGNC Symbol;Acc:HGNC:370]	protein_coding	6:151239967-151358559:1	242	2122	314	1568	973	6120	7181	2669	3911	867	25967	42.973	59.753	28.602	10.594	47.544	35.641	91.153	62.243	33.23	27.93	26.075	4.25227	0.90019	0.21947	1.24492	0.96996	8.42543	2.01846	0.62839	0.64229	0.72369	2	Cluster 9 (Sertoli) | Cluster 4 (spermatocyte)	0.598 | 0.912	0.429 | 0.37	0.169 | 0.542	0.542	0.888 | 2.212	1.178e-41 | 0.000e+00	5.960e-37 | 0.000e+00	.	yes	no	no
AKAP13	ENSG00000170776	A-kinase anchoring protein 13 [Source:HGNC Symbol;Acc:HGNC:371]	protein_coding	15:85380571-85749358:1	100	2065	1006	1550	880	1608	7450	4829	4580	828	24896	41.2	24.691	27.834	33.941	46.998	32.234	23.95	64.575	60.122	32.707	24.902	0.96067	0.77138	0.82536	1.18424	0.73636	0.28186	1.57797	1.48234	0.55299	0.57025	1	Cluster 1 (early spermatid 1) | Cluster 2 (early spermatid 2)	0.646 | 0.601	0.357 | 0.383	0.289 | 0.218	0.289	0.538 | 0.429	0.000e+00 | 1.000e-299	0.000e+00 | 7.000e-295	early spermatid	no	no	no
AKAP14	ENSG00000186471	A-kinase anchoring protein 14 [Source:HGNC Symbol;Acc:HGNC:24061]	protein_coding	X:119895837-119920716:1	64	207	109	198	206	1281	6788	5084	10872	2195	27004	44.689	15.802	2.79	3.677	6.004	7.546	19.08	58.837	63.297	77.641	66.015	0.56258	0.06557	0.06018	0.14114	0.17068	0.2611	1.18093	1.79588	3.26449	3.14976	1	Cluster 0 (late spermatid 1) | Cluster 5 (late spermatid 2)	0.776 | 0.66	0.347 | 0.434	0.429 | 0.226	0.429	1.161 | 0.818	0.000e+00 | 0.000e+00	0.000e+00 | 0.000e+00	late spermatid	no	no	no
AKAP17A	ENSG00000197976	A-kinase anchoring protein 17A [Source:HGNC Symbol;Acc:HGNC:18783]	protein_coding	X:1591604-1602520:1	53	1270	592	935	579	623	3003	1453	753	82	9343	15.462	13.086	17.118	19.973	28.351	21.209	9.279	26.029	18.09	5.377	2.466	0.35397	0.41863	0.36278	0.51052	0.38501	0.08882	0.31008	0.23829	0.07005	0.04335	1	Cluster 6 (undiff SPG)	0.284	0.147	0.137	0.137	0.308	3.29e-104	1.66e-99	undiff SPG	no	no	no
AKAP17BP	ENSG00000214992	A-kinase anchoring protein 17B, pseudogene [Source:HGNC Symbol;Acc:HGNC:38514]	unprocessed_pseudogene	X:119249346-119257667:-1	2	29	10	242	682	654	327	39	39	7	2031	3.361	0.494	0.391	0.337	7.338	24.982	9.741	2.834	0.486	0.279	0.211	0.01567	0.00715	0.00559	0.12318	0.59288	0.08236	0.02499	0.0048	0.0054	0.00401	1	Cluster 8 (diff SPG/early meiosis)	0.25	0.023	0.227	0.227	0.636	0	0	diff SPG/early meiosis	no	no	no
AKAP3	ENSG00000111254	A-kinase anchoring protein 3 [Source:HGNC Symbol;Acc:HGNC:373]	protein_coding	12:4615508-4649051:-1	67	241	82	354	373	2791	8594	6677	8409	471	28059	46.435	16.543	3.248	2.767	10.734	13.663	41.57	74.491	83.13	60.051	14.165	0.70236	0.08511	0.04602	0.22372	0.30403	0.59894	2.37169	4.47588	2.19536	0.30617	2	Cluster 1 (early spermatid 1) | Cluster 2 (early spermatid 2) | Cluster 0 (late spermatid 1)	0.745 | 0.831 | 0.601	0.398 | 0.408 | 0.423	0.347 | 0.423 | 0.178	0.423	0.420 | 1.280 | 0.338	0.000e+00 | 0.000e+00 | 3.000e-296	0.000e+00 | 0.000e+00 | 1.783e-291	.	no	no	no
AKAP4	ENSG00000147081	A-kinase anchoring protein 4 [Source:HGNC Symbol;Acc:HGNC:374]	protein_coding	X:50190777-50201007:-1	117	365	239	301	286	1026	6247	6217	12821	3098	30717	50.833	28.889	4.92	8.063	9.127	10.476	15.282	54.148	77.403	91.559	93.173	1.63193	0.1593	0.20359	0.24351	0.2789	0.25839	1.34687	4.49443	10.935	13.0183	1	Cluster 0 (late spermatid 1) | Cluster 5 (late spermatid 2)	0.916 | 0.932	0.385 | 0.484	0.531 | 0.448	0.531	1.913 | 1.581	0.000e+00 | 0.000e+00	0.000e+00 | 0.000e+00	late spermatid	no	no	no
AKAP5	ENSG00000179841	A-kinase anchoring protein 5 [Source:HGNC Symbol;Acc:HGNC:375]	protein_coding	14:64465499-64474503:1	2	112	88	139	112	103	222	452	70	7	1307	2.163	0.494	1.51	2.969	4.215	4.103	1.534	1.924	5.627	0.5	0.211	0.00481	0.03235	0.04095	0.06954	0.0741	0.00958	0.01436	0.06587	0.00753	0.00385	0	.	.	.	.	.	.	.	.	.	no	no	no
AKAP6	ENSG00000151320	A-kinase anchoring protein 6 [Source:HGNC Symbol;Acc:HGNC:376]	protein_coding	14:32329298-32837684:1	14	821	79	157	139	2720	4303	1484	1068	109	10894	18.028	3.457	11.066	2.665	4.76	5.092	40.512	37.297	18.476	7.627	3.278	0.06572	0.26947	0.03449	0.06702	0.08047	0.51458	0.48998	0.21406	0.09389	0.06471	2	Cluster 4 (spermatocyte) | Cluster 1 (early spermatid 1)	0.405 | 0.373	0.152 | 0.135	0.253 | 0.238	0.253	0.320 | 0.325	0.000e+00 | 0.000e+00	0.000e+00 | 0.000e+00	.	no	no	no
AKAP7	ENSG00000118507	A-kinase anchoring protein 7 [Source:HGNC Symbol;Acc:HGNC:377]	protein_coding	6:131135467-131283535:1	79	541	372	1173	374	241	926	262	202	27	4197	6.946	19.506	7.292	12.551	35.567	13.7	3.59	8.026	3.262	1.443	0.812	0.66989	0.16273	0.20816	0.77482	0.23546	0.02907	0.07794	0.0395	0.02284	0.0159	1	Cluster 6 (undiff SPG)	0.356	0.053	0.303	0.303	0.718	0	0	undiff SPG	no	no	no
AKAP8	ENSG00000105127	A-kinase anchoring protein 8 [Source:HGNC Symbol;Acc:HGNC:378]	protein_coding	19:15353385-15379815:-1	23	834	421	858	627	1113	762	170	163	27	4998	8.271	5.679	11.241	14.204	26.016	22.967	16.577	6.605	2.117	1.164	0.812	0.128	0.26152	0.21789	0.50159	0.42083	0.15791	0.06983	0.02881	0.01751	0.01595	1	Cluster 6 (undiff SPG)	0.26	0.072	0.188	0.188	0.438	2.94e-244	1.49e-239	undiff SPG	no	no	no
AKAP8L	ENSG00000011243	A-kinase anchoring protein 8 like [Source:HGNC Symbol;Acc:HGNC:29857]	protein_coding	19:15380050-15419141:-1	17	590	253	714	818	1165	3004	1102	339	63	8065	13.347	4.198	7.953	8.536	21.649	29.963	17.352	26.038	13.72	2.421	1.895	0.17461	0.17991	0.13854	0.39542	0.69568	0.18689	0.3334	0.17425	0.03516	0.03187	1	Cluster 8 (diff SPG/early meiosis)	0.3	0.126	0.174	0.174	0.527	3.14e-203	1.59e-198	diff SPG/early meiosis	no	no	no
AKAP8P1	ENSG00000234146	A-kinase anchoring protein 8 pseudogene 1 [Source:HGNC Symbol;Acc:HGNC:49758]	processed_pseudogene	9:11011748-11013096:1	0	0	0	3	0	0	0	0	0	0	3	0.005	0	0	0	0.091	0	0	0	0	0	0	0	0	0	0.00097	0	0	0	0	0	0	0	.	.	.	.	.	.	.	.	.	no	no	no
AKAP9	ENSG00000127914	A-kinase anchoring protein 9 [Source:HGNC Symbol;Acc:HGNC:379]	protein_coding	7:91940840-92110673:1	101	3599	1527	1834	1505	1755	4464	2683	2023	394	19885	32.907	24.938	48.511	51.518	55.609	55.128	26.139	38.693	33.404	14.447	11.85	0.97771	1.71729	1.50339	1.98358	2.05471	0.31391	0.75679	0.53669	0.22411	0.2357	4	Cluster 3 (myoid/Leydig) | Cluster 7 (endothelia/macrophage) | Cluster 6 (undiff SPG) | Cluster 8 (diff SPG/early meiosis)	0.485 | 0.515 | 0.556 | 0.551	0.307 | 0.319 | 0.316 | 0.319	0.178 | 0.196 | 0.240 | 0.232	0.24	0.693 | 0.499 | 0.778 | 0.805	0.000e+00 | 6.192e-146 | 3.239e-264 | 9.457e-254	0.000e+00 | 3.132e-141 | 1.638e-259 | 4.783e-249	.	no	yes	yes
AKIP1	ENSG00000166452	A-kinase interacting protein 1 [Source:HGNC Symbol;Acc:HGNC:1170]	protein_coding	11:8911139-8920084:1	49	1340	640	714	866	2697	3951	1591	1641	38	13527	22.386	12.099	18.062	21.592	21.649	31.722	40.17	34.246	19.808	11.719	1.143	0.34892	0.42258	0.37404	0.38234	0.66563	0.49009	0.41459	0.19283	0.13985	0.02452	1	Cluster 8 (diff SPG/early meiosis)	0.317	0.219	0.098	0.098	0.358	1.14e-109	5.76e-105	diff SPG/early meiosis	no	no	no
AKIRIN1	ENSG00000174574	akirin 1 [Source:HGNC Symbol;Acc:HGNC:25744]	protein_coding	1:38991276-39006059:1	237	1474	784	2249	1303	2402	8121	6367	10312	1009	34258	56.693	58.519	19.868	26.451	68.193	47.729	35.776	70.391	79.27	73.641	30.346	3.26527	0.48867	0.48286	2.34419	1.40405	0.59848	2.60502	5.58944	4.49982	0.74535	2	Cluster 2 (early spermatid 2) | Cluster 0 (late spermatid 1)	0.793 | 0.736	0.532 | 0.516	0.261 | 0.220	0.261	1.023 | 0.808	0.000e+00 | 0.000e+00	0.000e+00 | 0.000e+00	.	no	no	no
AKIRIN2	ENSG00000135334	akirin 2 [Source:HGNC Symbol;Acc:HGNC:21407]	protein_coding	6:87674860-87702233:-1	92	1224	814	2024	1136	3551	2677	2210	3771	625	18124	29.993	22.716	16.498	27.463	61.371	41.612	52.889	23.204	27.515	26.93	18.797	0.75921	0.3772	0.53271	1.77923	0.96482	0.81426	0.26123	0.35591	0.38323	0.41582	3	Cluster 6 (undiff SPG) | Cluster 8 (diff SPG/early meiosis) | Cluster 4 (spermatocyte)	0.614 | 0.416 | 0.529	0.282 | 0.294 | 0.271	0.332 | 0.122 | 0.258	0.332	0.944 | 0.393 | 0.293	0.000e+00 | 7.832e-100 | 0.000e+00	0.000e+00 | 3.961e-95 | 0.000e+00	.	no	no	no
AKIRIN2P1	ENSG00000251482	akirin 2 pseudogene 1 [Source:HGNC Symbol;Acc:HGNC:50796]	processed_pseudogene	4:149789952-149790303:1	0	0	1	0	0	0	7	0	0	0	8	0.013	0	0	0.034	0	0	0	0.061	0	0	0	0	0	0.00018	0	0	0	0.00036	0	0	0	0	.	.	.	.	.	.	.	.	.	no	no	no
AKNA	ENSG00000106948	AT-hook transcription factor [Source:HGNC Symbol;Acc:HGNC:24108]	protein_coding	9:114334156-114394405:-1	10	565	327	206	101	436	1463	1912	1678	329	7027	11.629	2.469	7.616	11.032	6.246	3.7	6.494	12.681	23.805	11.983	9.895	0.10205	0.177	0.19586	0.09007	0.05611	0.052	0.11904	0.34526	0.14198	0.18733	0	.	.	.	.	.	.	.	.	.	no	no	no
AKNAD1	ENSG00000162641	AKNA domain containing 1 [Source:HGNC Symbol;Acc:HGNC:28398]	protein_coding	1:108815898-108963484:-1	7	111	53	75	71	124	1825	4132	1685	65	8148	13.484	1.728	1.496	1.788	2.274	2.601	1.847	15.819	51.444	12.033	1.955	0.04661	0.0333	0.02491	0.04075	0.03896	0.02573	0.22416	1.19381	0.17259	0.0394	1	Cluster 2 (early spermatid 2)	0.514	0.077	0.437	0.437	0.98	0	0	early spermatid	no	no	no
AKR1A1	ENSG00000117448	aldo-keto reductase family 1 member A1 [Source:HGNC Symbol;Acc:HGNC:380]	protein_coding	1:45550543-45570049:1	57	2365	1048	1405	485	486	536	288	332	29	7031	11.636	14.074	31.878	35.358	42.602	17.766	7.239	4.646	3.586	2.371	0.872	0.42046	0.86507	0.71807	0.92854	0.32436	0.066	0.03948	0.03234	0.02516	0.01602	3	Cluster 3 (myoid/Leydig) | Cluster 7 (endothelia/macrophage) | Cluster 6 (undiff SPG)	0.319 | 0.354 | 0.426	0.088 | 0.104 | 0.098	0.231 | 0.250 | 0.328	0.328	0.701 | 0.505 | 0.690	0.000e+00 | 1.333e-265 | 0.000e+00	0.000e+00 | 6.740e-261 | 0.000e+00	.	no	yes	yes
AKR1B1	ENSG00000085662	aldo-keto reductase family 1 member B [Source:HGNC Symbol;Acc:HGNC:381]	protein_coding	7:134442356-134459284:-1	160	2440	1100	2480	1237	557	503	275	406	91	9249	15.306	39.506	32.889	37.112	75.197	45.311	8.296	4.36	3.424	2.899	2.737	1.64224	0.87891	0.95979	3.29433	1.19862	0.09613	0.05183	0.03872	0.05099	0.05745	5	Cluster 9 (Sertoli) | Cluster 3 (myoid/Leydig) | Cluster 7 (endothelia/macrophage) | Cluster 6 (undiff SPG) | Cluster 8 (diff SPG/early meiosis)	0.395 | 0.329 | 0.371 | 0.752 | 0.453	0.151 | 0.128 | 0.142 | 0.118 | 0.139	0.244 | 0.201 | 0.229 | 0.634 | 0.314	0.634	0.883 | 0.446 | 0.471 | 1.751 | 0.646	8.219e-43 | 0.000e+00 | 1.228e-200 | 0.000e+00 | 0.000e+00	4.157e-38 | 0.000e+00 | 6.213e-196 | 0.000e+00 | 0.000e+00	.	yes	yes	yes
AKR1B10	ENSG00000198074	aldo-keto reductase family 1 member B10 [Source:HGNC Symbol;Acc:HGNC:382]	protein_coding	7:134527567-134541412:1	3	100	7	90	42	96	124	120	58	4	644	1.066	0.741	1.348	0.236	2.729	1.538	1.43	1.075	1.494	0.414	0.12	0.0331	0.03052	0.00508	0.03477	0.02548	0.01304	0.00937	0.01448	0.00401	0.00207	0	.	.	.	.	.	.	.	.	.	no	no	no
AKR1B10P1	ENSG00000213606	aldo-keto reductase family 1 member B10 pseudogene 1 [Source:HGNC Symbol;Acc:HGNC:45062]	processed_pseudogene	10:67750284-67751225:1	0	0	0	0	0	0	0	0	0	0	0	0	0	0	0	0	0	0	0	0	0	0	0	0	0	0	0	0	0	0	0	0	0	.	.	.	.	.	.	.	.	.	no	no	no
AKR1B10P2	ENSG00000263355	aldo-keto reductase family 1 member B10 pseudogene 2 [Source:HGNC Symbol;Acc:HGNC:45063]	processed_pseudogene	18:68455951-68456877:1	0	2	9	7	5	5	17	7	1	0	53	0.088	0	0.027	0.304	0.212	0.183	0.074	0.147	0.087	0.007	0	0	0.00069	0.0029	0.0028	0.00283	0.0004	0.00148	0.00063	0.00021	0	0	.	.	.	.	.	.	.	.	.	no	no	no
AKR1B15	ENSG00000227471	aldo-keto reductase family 1 member B15 [Source:HGNC Symbol;Acc:HGNC:37281]	protein_coding	7:134549110-134579875:1	0	27	19	185	36	58	255	155	142	29	906	1.499	0	0.364	0.641	5.609	1.319	0.864	2.21	1.93	1.014	0.872	0	0.00719	0.01119	0.07873	0.01959	0.00766	0.0203	0.02113	0.01103	0.01364	0	.	.	.	.	.	.	.	.	.	no	no	no
AKR1B1P3	ENSG00000213785	aldo-keto reductase family 1 member B1 pseudogene 3 [Source:HGNC Symbol;Acc:HGNC:422]	processed_pseudogene	11:16484084-16484671:-1	0	0	0	0	0	0	0	0	1	0	1	0.002	0	0	0	0	0	0	0	0	0.007	0	0	0	0	0	0	0	0	0	3e-05	0	0	.	.	.	.	.	.	.	.	.	no	no	no
AKR1B1P5	ENSG00000258685	aldo-keto reductase family 1 member B1 pseudogene 5 [Source:HGNC Symbol;Acc:HGNC:20002]	processed_pseudogene	14:59135488-59136421:-1	0	0	0	0	0	2	4	1	0	0	7	0.012	0	0	0	0	0	0.03	0.035	0.012	0	0	0	0	0	0	0	0.00016	0.00037	0.00042	0	0	0	.	.	.	.	.	.	.	.	.	no	no	no
AKR1C1	ENSG00000187134	aldo-keto reductase family 1 member C1 [Source:HGNC Symbol;Acc:HGNC:384]	protein_coding	10:4963253-4983283:1	55	2882	253	129	67	193	839	1567	710	32	6727	11.132	13.58	38.846	8.536	3.911	2.454	2.875	7.272	19.509	5.07	0.962	0.40021	1.23556	0.14035	0.05352	0.04293	0.02349	0.0666	0.23323	0.06237	0.0227	1	Cluster 3 (myoid/Leydig)	0.388	0.073	0.315	0.315	1.04	0	0	myoid/Leydig	no	yes	no
AKR1C2	ENSG00000151632	aldo-keto reductase family 1 member C2 [Source:HGNC Symbol;Acc:HGNC:385]	protein_coding	10:4987400-5018031:-1	10	1764	76	127	102	336	1386	2314	1755	277	8147	13.482	2.469	23.777	2.564	3.851	3.736	5.004	12.014	28.81	12.533	8.331	0.0617	0.61941	0.03888	0.05591	0.0711	0.04695	0.11845	0.32896	0.14017	0.17029	0	.	.	.	.	.	.	.	.	.	no	no	no
AKR1C3	ENSG00000196139	aldo-keto reductase family 1 member C3 [Source:HGNC Symbol;Acc:HGNC:386]	protein_coding	10:5035354-5107686:1	12	2568	1243	358	44	56	347	189	162	7	4986	8.251	2.963	34.614	41.937	10.855	1.612	0.834	3.008	2.353	1.157	0.211	0.09993	1.07778	1.19492	0.1717	0.01965	0.00943	0.02926	0.02292	0.01511	0.00507	2	Cluster 3 (myoid/Leydig) | Cluster 7 (endothelia/macrophage)	0.346 | 0.419	0.046 | 0.065	0.300 | 0.354	0.354	0.925 | 0.914	0.000e+00 | 0.000e+00	0.000e+00 | 0.000e+00	.	no	yes	yes
AKR1C4	ENSG00000198610	aldo-keto reductase family 1 member C4 [Source:HGNC Symbol;Acc:HGNC:387]	protein_coding	10:5195462-5218949:1	0	11	7	101	17	325	441	150	69	4	1125	1.862	0	0.148	0.236	3.062	0.623	4.841	3.822	1.868	0.493	0.12	0	0.00381	0.00371	0.04936	0.00985	0.04494	0.03733	0.01628	0.0043	0.00205	0	.	.	.	.	.	.	.	.	.	no	no	no
AKR1C5P	ENSG00000225418	aldo-keto reductase family 1 member C5, pseudogene [Source:HGNC Symbol;Acc:HGNC:44679]	unprocessed_pseudogene	10:5122087-5135226:-1	0	2	0	0	1	0	1	0	0	0	4	0.007	0	0.027	0	0	0.037	0	0.009	0	0	0	0	0.00064	0	0	0.00044	0	8e-05	0	0	0	0	.	.	.	.	.	.	.	.	.	no	no	no
AKR1C6P	ENSG00000151631	aldo-keto reductase family 1 member C6, pseudogene [Source:HGNC Symbol;Acc:HGNC:44680]	unprocessed_pseudogene	10:4871901-4891975:-1	1	23	4	1	14	57	163	156	102	4	525	0.869	0.247	0.31	0.135	0.03	0.513	0.849	1.413	1.942	0.728	0.12	0.0036	0.00541	0.00045	0.00045	0.01155	0.00436	0.0118	0.01863	0.00804	0.00186	0	.	.	.	.	.	.	.	.	.	no	no	no
AKR1C7P	ENSG00000215267	aldo-keto reductase family 1 member C7, pseudogene [Source:HGNC Symbol;Acc:HGNC:44681]	transcribed_unprocessed_pseudogene	10:5275173-5288470:-1	0	0	3	10	0	2	8	1	1	0	25	0.041	0	0	0.101	0.303	0	0.03	0.069	0.012	0.007	0	0	0	0.00139	0.00453	0	0.00036	0.00034	4e-05	3e-05	0	0	.	.	.	.	.	.	.	.	.	no	no	no
AKR1C8P	ENSG00000264006	aldo-keto reductase family 1 member C8, pseudogene [Source:HGNC Symbol;Acc:HGNC:23469]	protein_coding	10:5154140-5185187:-1	0	3	13	24	1	8	22	7	1	1	80	0.132	0	0.04	0.439	0.728	0.037	0.119	0.191	0.087	0.007	0.03	0	0.00034	0.00867	0.00799	0.00073	0.00068	0.00099	0.00065	0.00019	0.00109	0	.	.	.	.	.	.	.	.	.	no	no	no
AKR1D1	ENSG00000122787	aldo-keto reductase family 1 member D1 [Source:HGNC Symbol;Acc:HGNC:388]	protein_coding	7:138002324-138118305:1	5	46	26	157	76	195	3009	2016	3541	605	9676	16.013	1.235	0.62	0.877	4.76	2.784	2.904	26.081	25.1	25.287	18.195	0.03397	0.01262	0.0109	0.06463	0.04606	0.03568	0.2854	0.28498	0.32576	0.34535	0	.	.	.	.	.	.	.	.	.	no	no	no
AKR1E2	ENSG00000165568	aldo-keto reductase family 1 member E2 [Source:HGNC Symbol;Acc:HGNC:23437]	protein_coding	10:4786629-4848062:1	25	103	51	133	433	2696	5393	4066	5826	339	19065	31.55	6.173	1.388	1.721	4.033	15.861	40.155	46.745	50.623	41.605	10.195	0.17404	0.02885	0.0221	0.06519	0.32273	0.47327	0.65552	0.84661	0.68745	0.17001	1	Cluster 2 (early spermatid 2)	0.506	0.286	0.22	0.22	0.372	0	0	early spermatid	no	no	no
AKR7A2	ENSG00000053371	aldo-keto reductase family 7 member A2 [Source:HGNC Symbol;Acc:HGNC:389]	protein_coding	1:19303965-19312144:-1	142	2786	773	584	587	3738	5162	2527	2849	78	19226	31.817	35.062	37.552	26.08	17.708	21.502	55.675	44.743	31.462	20.346	2.346	1.24893	1.0597	0.43265	0.31009	0.38703	1.01664	0.64451	0.34765	0.2749	0.04625	3	Cluster 9 (Sertoli) | Cluster 3 (myoid/Leydig) | Cluster 4 (spermatocyte)	0.351 | 0.376 | 0.557	0.318 | 0.31 | 0.288	0.033 | 0.066 | 0.269	0.269	0.548 | 0.486 | 0.443	7.096e-48 | 0.000e+00 | 0.000e+00	3.589e-43 | 0.000e+00 | 0.000e+00	.	yes	yes	no
AKR7A2P1	ENSG00000229020	AKR7A2 pseudogene 1 [Source:HGNC Symbol;Acc:HGNC:24062]	processed_pseudogene	1:112923423-112924337:1	0	0	0	0	0	0	1	0	0	0	1	0.002	0	0	0	0	0	0	0.009	0	0	0	0	0	0	0	0	0	3e-05	0	0	0	0	.	.	.	.	.	.	.	.	.	no	no	no
AKR7A2P2	ENSG00000224341	AKR7A2P pseudogene 1 [Source:HGNC Symbol;Acc:HGNC:55059]	processed_pseudogene	X:118877886-118879185:-1	0	0	0	0	0	0	0	0	0	0	0	0	0	0	0	0	0	0	0	0	0	0	0	0	0	0	0	0	0	0	0	0	0	.	.	.	.	.	.	.	.	.	no	no	no
AKR7A3	ENSG00000162482	aldo-keto reductase family 7 member A3 [Source:HGNC Symbol;Acc:HGNC:390]	protein_coding	1:19282573-19288770:-1	2	30	2	59	8	90	120	56	93	10	470	0.778	0.494	0.404	0.067	1.789	0.293	1.34	1.04	0.697	0.664	0.301	0.01086	0.00837	0.00174	0.02235	0.00224	0.01075	0.0079	0.00595	0.00577	0.00373	0	.	.	.	.	.	.	.	.	.	no	no	no
AKR7L	ENSG00000211454	aldo-keto reductase family 7 like (gene/pseudogene) [Source:HGNC Symbol;Acc:HGNC:24056]	polymorphic_pseudogene	1:19265982-19274194:-1	0	100	51	137	84	126	114	74	33	5	724	1.198	0	1.348	1.721	4.154	3.077	1.877	0.988	0.921	0.236	0.15	0	0.03058	0.03302	0.05776	0.05047	0.01214	0.00767	0.01024	0.00273	0.00123	0	.	.	.	.	.	.	.	.	.	no	no	no
AKT1	ENSG00000142208	AKT serine/threonine kinase 1 [Source:HGNC Symbol;Acc:HGNC:391]	protein_coding	14:104769349-104795751:-1	94	1069	612	397	155	152	313	342	342	37	3513	5.814	23.21	14.409	20.648	12.038	5.678	2.264	2.713	4.258	2.442	1.113	0.72265	0.3114	0.31176	0.18056	0.08504	0.01762	0.02149	0.05141	0.02836	0.02138	0	.	.	.	.	.	.	.	.	.	no	no	no
AKT1S1	ENSG00000204673	AKT1 substrate 1 [Source:HGNC Symbol;Acc:HGNC:28426]	protein_coding	19:49869033-49878459:-1	30	1130	462	880	346	811	679	732	697	74	5841	9.666	7.407	15.231	15.587	26.683	12.674	12.079	5.885	9.114	4.978	2.226	0.15772	0.34462	0.26152	0.47296	0.20257	0.11711	0.05565	0.15017	0.06193	0.04035	1	Cluster 6 (undiff SPG)	0.267	0.087	0.18	0.18	0.379	1.1e-199	5.58e-195	undiff SPG	no	no	no
AKT2	ENSG00000105221	AKT serine/threonine kinase 2 [Source:HGNC Symbol;Acc:HGNC:392]	protein_coding	19:40230317-40285536:-1	62	1355	410	735	504	840	839	762	747	154	6408	10.605	15.309	18.264	13.833	22.286	18.462	12.511	7.272	9.487	5.335	4.632	0.50752	0.46058	0.21394	0.36051	0.32113	0.11339	0.06405	0.11338	0.06059	0.07783	0	.	.	.	.	.	.	.	.	.	no	no	no
AKT3	ENSG00000117020	AKT serine/threonine kinase 3 [Source:HGNC Symbol;Acc:HGNC:393]	protein_coding	1:243488233-243851079:-1	57	1220	975	997	533	1102	3862	3581	3608	420	16355	27.066	14.074	16.444	32.895	30.23	19.524	16.413	33.475	44.584	25.766	12.632	0.46138	0.39741	0.70036	0.61661	0.3767	0.16383	0.43551	0.70518	0.36179	0.26247	2	Cluster 7 (endothelia/macrophage) | Cluster 2 (early spermatid 2)	0.329 | 0.446	0.268 | 0.244	0.061 | 0.202	0.202	0.264 | 0.297	4.828e-56 | 1.497e-288	2.442e-51 | 7.570e-284	.	no	no	yes
AKT3-IT1	ENSG00000228939	AKT3 intronic transcript 1 [Source:HGNC Symbol;Acc:HGNC:41304]	lncRNA	1:243793205-243794400:-1	0	88	77	72	42	52	233	128	15	0	707	1.17	0	1.186	2.598	2.183	1.538	0.775	2.02	1.594	0.107	0	0	0.02736	0.04009	0.03051	0.01953	0.00479	0.01889	0.0208	0.00123	0	0	.	.	.	.	.	.	.	.	.	no	no	no
AKTIP	ENSG00000166971	AKT interacting protein [Source:HGNC Symbol;Acc:HGNC:16710]	protein_coding	16:53491040-53504411:-1	66	1009	475	1545	782	1292	2096	4121	7383	1489	20258	33.525	16.296	13.6	16.026	46.847	28.645	19.243	18.168	51.307	52.724	44.782	0.50789	0.30239	0.25678	1.0359	0.57885	0.22727	0.19626	1.00403	1.07639	1.12706	3	Cluster 6 (undiff SPG) | Cluster 2 (early spermatid 2) | Cluster 0 (late spermatid 1) | Cluster 5 (late spermatid 2)	0.468 | 0.513 | 0.527 | 0.448	0.328 | 0.308 | 0.277 | 0.329	0.140 | 0.205 | 0.250 | 0.119	0.25	0.329 | 0.336 | 0.457 | 0.397	4.836e-86 | 1.292e-273 | 0.000e+00 | 9.650e-117	2.446e-81 | 6.535e-269 | 0.000e+00 | 4.881e-112	.	no	no	no
ALAD	ENSG00000148218	aminolevulinate dehydratase [Source:HGNC Symbol;Acc:HGNC:395]	protein_coding	9:113386312-113401290:-1	46	444	272	216	227	822	813	394	518	69	3821	6.323	11.358	5.985	9.177	6.549	8.315	12.243	7.047	4.905	3.699	2.075	0.35402	0.12587	0.12679	0.1001	0.12401	0.10334	0.06584	0.04545	0.04033	0.03928	0	.	.	.	.	.	.	.	.	.	no	no	no
ALAS1	ENSG00000023330	5'-aminolevulinate synthase 1 [Source:HGNC Symbol;Acc:HGNC:396]	protein_coding	3:52198086-52214327:1	27	621	405	662	678	651	334	503	351	17	4249	7.032	6.667	8.37	13.664	20.073	24.835	9.696	2.895	6.262	2.507	0.511	0.17934	0.18225	0.20862	0.3279	0.45832	0.10419	0.02274	0.07174	0.03238	0.00852	0	.	.	.	.	.	.	.	.	.	no	no	no
ALAS2	ENSG00000158578	5'-aminolevulinate synthase 2 [Source:HGNC Symbol;Acc:HGNC:397]	protein_coding	X:55009055-55030977:-1	1	0	0	36	1	0	0	1	0	0	39	0.065	0.247	0	0	1.092	0.037	0	0	0.012	0	0	0.00849	0	0	0.01407	0.00025	0	0	3e-05	0	0	0	.	.	.	.	.	.	.	.	.	no	no	no
ALB	ENSG00000163631	albumin [Source:HGNC Symbol;Acc:HGNC:399]	protein_coding	4:73397114-73421482:1	3	7	3	271	14	27	79	69	56	0	529	0.875	0.741	0.094	0.101	8.217	0.513	0.402	0.685	0.859	0.4	0	0.02941	0.00167	0.0006	0.11553	0.005	0.0022	0.0058	0.00918	0.00521	0	0	.	.	.	.	.	.	.	.	.	no	no	no
ALCAM	ENSG00000170017	activated leukocyte cell adhesion molecule [Source:HGNC Symbol;Acc:HGNC:400]	protein_coding	3:105366909-105576900:1	16	210	410	196	152	94	2877	2183	2070	271	8479	14.032	3.951	2.831	13.833	5.943	5.568	1.4	24.937	27.179	14.783	8.15	0.09329	0.06091	0.31011	0.10298	0.09413	0.01966	0.29379	0.31355	0.18155	0.16535	0	.	.	.	.	.	.	.	.	.	no	no	no
ALDH16A1	ENSG00000161618	aldehyde dehydrogenase 16 family member A1 [Source:HGNC Symbol;Acc:HGNC:28114]	protein_coding	19:49453225-49471050:1	17	809	455	480	305	249	373	274	209	17	3188	5.276	4.198	10.904	15.351	14.554	11.172	3.709	3.233	3.411	1.493	0.511	0.09304	0.25377	0.25223	0.22018	0.18822	0.03613	0.03355	0.04872	0.01843	0.00962	0	.	.	.	.	.	.	.	.	.	no	no	no
ALDH18A1	ENSG00000059573	aldehyde dehydrogenase 18 family member A1 [Source:HGNC Symbol;Acc:HGNC:9722]	protein_coding	10:95605941-95656711:-1	17	414	107	244	293	208	90	56	68	12	1509	2.497	4.198	5.58	3.61	7.398	10.733	3.098	0.78	0.697	0.486	0.361	0.05856	0.11766	0.04396	0.10443	0.16141	0.03157	0.00832	0.01006	0.00627	0.00603	0	.	.	.	.	.	.	.	.	.	no	no	no
ALDH1A1	ENSG00000165092	aldehyde dehydrogenase 1 family member A1 [Source:HGNC Symbol;Acc:HGNC:402]	protein_coding	9:72900671-73080442:-1	342	4358	356	262	98	208	320	332	712	158	7146	11.826	84.444	58.741	12.011	7.944	3.59	3.098	2.774	4.133	5.085	4.752	9.1854	2.66129	0.20517	0.13118	0.08179	0.05746	0.03248	0.06399	0.11461	0.13475	2	Cluster 9 (Sertoli) | Cluster 3 (myoid/Leydig)	0.844 | 0.587	0.113 | 0.053	0.731 | 0.534	0.731	2.857 | 1.662	0.000e+00 | 0.000e+00	0.000e+00 | 0.000e+00	.	yes	yes	no
ALDH1A2	ENSG00000128918	aldehyde dehydrogenase 1 family member A2 [Source:HGNC Symbol;Acc:HGNC:15472]	protein_coding	15:57953424-58497866:-1	22	347	39	759	488	4262	6306	2775	1259	73	16330	27.024	5.432	4.677	1.316	23.014	17.875	63.479	54.659	34.549	8.991	2.195	0.17059	0.11572	0.01771	0.39643	0.34185	1.30952	0.90417	0.44786	0.13012	0.04145	2	Cluster 4 (spermatocyte) | Cluster 1 (early spermatid 1)	0.635 | 0.547	0.225 | 0.205	0.410 | 0.342	0.41	0.767 | 0.486	0.000e+00 | 0.000e+00	0.000e+00 | 0.000e+00	.	no	no	no
ALDH1A3	ENSG00000184254	aldehyde dehydrogenase 1 family member A3 [Source:HGNC Symbol;Acc:HGNC:409]	protein_coding	15:100877714-100916626:1	3	2702	124	97	44	94	67	35	78	16	3260	5.395	0.741	36.42	4.184	2.941	1.612	1.4	0.581	0.436	0.557	0.481	0.03008	1.20732	0.06711	0.04542	0.02627	0.01078	0.00597	0.00562	0.00957	0.00957	1	Cluster 3 (myoid/Leydig)	0.364	0.011	0.353	0.353	1.121	0	0	myoid/Leydig	no	yes	no
ALDH1B1	ENSG00000137124	aldehyde dehydrogenase 1 family member B1 [Source:HGNC Symbol;Acc:HGNC:407]	protein_coding	9:38392702-38398661:1	53	346	141	98	56	122	197	174	91	9	1287	2.13	13.086	4.664	4.757	2.971	2.051	1.817	1.708	2.166	0.65	0.271	0.44251	0.10112	0.06438	0.0425	0.03186	0.01856	0.01421	0.02716	0.00965	0.00618	0	.	.	.	.	.	.	.	.	.	no	no	no
ALDH1L1	ENSG00000144908	aldehyde dehydrogenase 1 family member L1 [Source:HGNC Symbol;Acc:HGNC:3978]	protein_coding	3:126103562-126197994:-1	32	654	87	535	97	306	2314	1071	1316	292	6704	11.094	7.901	8.815	2.935	16.222	3.553	4.558	20.057	13.334	9.398	8.782	0.20725	0.21157	0.05	0.26287	0.05502	0.04515	0.19507	0.14109	0.10868	0.16396	0	.	.	.	.	.	.	.	.	.	no	no	no
ALDH1L1-AS1	ENSG00000250218	ALDH1L1 antisense RNA 1 [Source:HGNC Symbol;Acc:HGNC:40244]	lncRNA	3:126103640-126108069:1	0	1	2	7	4	3	10	2	2	1	32	0.053	0	0.013	0.067	0.212	0.147	0.045	0.087	0.025	0.014	0.03	0	0.00014	0.0003	0.00424	0.00163	0.00051	0.00073	0.00084	4e-05	0.00062	0	.	.	.	.	.	.	.	.	.	no	no	no
ALDH1L1-AS2	ENSG00000246022	ALDH1L1 antisense RNA 2 [Source:HGNC Symbol;Acc:HGNC:42446]	lncRNA	3:126180012-126210169:1	2	64	13	28	35	110	1075	1724	2230	293	5574	9.224	0.494	0.863	0.439	0.849	1.282	1.638	9.318	21.464	15.925	8.812	0.01398	0.01912	0.00487	0.01324	0.02291	0.02275	0.10031	0.22516	0.19252	0.1667	0	.	.	.	.	.	.	.	.	.	no	no	no
ALDH1L2	ENSG00000136010	aldehyde dehydrogenase 1 family member L2 [Source:HGNC Symbol;Acc:HGNC:26777]	protein_coding	12:105019784-105107643:-1	7	291	38	155	98	1448	3129	1148	823	124	7261	12.016	1.728	3.922	1.282	4.7	3.59	21.567	27.121	14.293	5.877	3.729	0.04009	0.07816	0.01529	0.0642	0.05874	0.17605	0.28456	0.13099	0.06562	0.06898	0	.	.	.	.	.	.	.	.	.	no	no	no
ALDH2	ENSG00000111275	aldehyde dehydrogenase 2 family member [Source:HGNC Symbol;Acc:HGNC:404]	protein_coding	12:111766887-111817532:1	205	2899	1229	545	288	530	1053	822	540	64	8175	13.529	50.617	39.075	41.464	16.525	10.549	7.894	9.127	10.234	3.856	1.925	2.26633	1.138	0.96425	0.25647	0.19076	0.06796	0.08928	0.12727	0.05869	0.04495	3	Cluster 9 (Sertoli) | Cluster 3 (myoid/Leydig) | Cluster 7 (endothelia/macrophage)	0.506 | 0.391 | 0.415	0.133 | 0.1 | 0.121	0.373 | 0.291 | 0.294	0.373	1.364 | 0.879 | 0.655	2.016e-134 | 0.000e+00 | 0.000e+00	1.020e-129 | 0.000e+00 | 0.000e+00	.	yes	yes	yes
ALDH3A1	ENSG00000108602	aldehyde dehydrogenase 3 family member A1 [Source:HGNC Symbol;Acc:HGNC:405]	protein_coding	17:19737984-19748943:-1	6	40	7	610	164	19	33	153	273	12	1317	2.179	1.481	0.539	0.236	18.496	6.007	0.283	0.286	1.905	1.95	0.361	0.04027	0.0105	0.00447	0.29098	0.10862	0.00326	0.00307	0.01601	0.01856	0.00712	0	.	.	.	.	.	.	.	.	.	no	no	no
ALDH3A2	ENSG00000072210	aldehyde dehydrogenase 3 family member A2 [Source:HGNC Symbol;Acc:HGNC:403]	protein_coding	17:19648136-19685760:1	126	1995	480	1153	726	611	1403	3334	1745	127	11700	19.362	31.111	26.89	16.194	34.961	26.593	9.1	12.161	41.509	12.462	3.82	1.05163	0.70359	0.28115	0.67235	0.51606	0.08978	0.12768	0.63253	0.17416	0.07318	4	Cluster 9 (Sertoli) | Cluster 3 (myoid/Leydig) | Cluster 6 (undiff SPG) | Cluster 2 (early spermatid 2)	0.311 | 0.269 | 0.35 | 0.415	0.193 | 0.183 | 0.185 | 0.16	0.118 | 0.086 | 0.165 | 0.255	0.255	0.631 | 0.415 | 0.352 | 0.347	1.340e-39 | 0.000e+00 | 4.694e-121 | 0.000e+00	6.779e-35 | 0.000e+00 | 2.374e-116 | 0.000e+00	.	yes	yes	no
ALDH3B1	ENSG00000006534	aldehyde dehydrogenase 3 family member B1 [Source:HGNC Symbol;Acc:HGNC:410]	protein_coding	11:68008578-68029282:1	3	342	247	350	175	244	1113	1309	743	49	4575	7.571	0.741	4.61	8.333	10.612	6.41	3.634	9.647	16.297	5.306	1.474	0.02053	0.10938	0.16848	0.15173	0.10463	0.03265	0.09006	0.23181	0.05952	0.02482	0	.	.	.	.	.	.	.	.	.	no	no	no
ALDH3B2	ENSG00000132746	aldehyde dehydrogenase 3 family member B2 [Source:HGNC Symbol;Acc:HGNC:411]	protein_coding	11:67662160-67681224:-1	0	0	0	11	1	0	2	2	6	0	22	0.036	0	0	0	0.334	0.037	0	0.017	0.025	0.043	0	0	0	0	0.00333	0.00054	0	4e-05	9e-05	0.00037	0	0	.	.	.	.	.	.	.	.	.	no	no	no
ALDH4A1	ENSG00000159423	aldehyde dehydrogenase 4 family member A1 [Source:HGNC Symbol;Acc:HGNC:406]	protein_coding	1:18871430-18902724:-1	12	123	54	185	137	81	89	31	49	3	764	1.264	2.963	1.658	1.822	5.609	5.018	1.206	0.771	0.386	0.35	0.09	0.08294	0.02909	0.01943	0.0746	0.07482	0.00714	0.00643	0.00282	0.00376	0.0018	0	.	.	.	.	.	.	.	.	.	no	no	no
ALDH5A1	ENSG00000112294	aldehyde dehydrogenase 5 family member A1 [Source:HGNC Symbol;Acc:HGNC:408]	protein_coding	6:24494867-24537207:1	30	331	181	413	183	426	681	331	152	22	2750	4.551	7.407	4.462	6.107	12.523	6.703	6.345	5.903	4.121	1.085	0.662	0.24588	0.09755	0.08035	0.18368	0.10101	0.04778	0.06	0.0526	0.01197	0.01049	0	.	.	.	.	.	.	.	.	.	no	no	no
ALDH6A1	ENSG00000119711	aldehyde dehydrogenase 6 family member A1 [Source:HGNC Symbol;Acc:HGNC:7179]	protein_coding	14:74056847-74084492:-1	152	1065	504	332	294	987	2135	1094	800	68	7431	12.297	37.531	14.355	17.004	10.067	10.769	14.701	18.506	13.621	5.713	2.045	1.78552	0.33879	0.26959	0.15934	0.18096	0.13675	0.17824	0.13363	0.0676	0.04351	1	Cluster 9 (Sertoli)	0.375	0.121	0.254	0.254	1.267	1.47e-160	7.45e-156	Sertoli	yes	no	no
ALDH7A1	ENSG00000164904	aldehyde dehydrogenase 7 family member A1 [Source:HGNC Symbol;Acc:HGNC:877]	protein_coding	5:126531200-126595362:-1	110	1805	645	800	285	469	1149	922	394	45	6624	10.962	27.16	24.329	21.761	24.257	10.44	6.985	9.959	11.479	2.814	1.353	1.01266	0.61432	0.36899	0.43984	0.17505	0.05685	0.0965	0.14158	0.03737	0.02412	1	Cluster 9 (Sertoli)	0.272	0.109	0.163	0.163	0.77	1e-55	5.07e-51	Sertoli	yes	no	no
ALDH7A1P1	ENSG00000251400	aldehyde dehydrogenase 7 family member A1 pseudogene 1 [Source:HGNC Symbol;Acc:HGNC:878]	processed_pseudogene	5:77290268-77291800:1	1	20	6	15	14	39	101	1237	1840	113	3386	5.603	0.247	0.27	0.202	0.455	0.513	0.581	0.875	15.401	13.14	3.398	0.01228	0.00502	0.00167	0.00789	0.00851	0.00815	0.00784	0.17082	0.13895	0.05397	0	.	.	.	.	.	.	.	.	.	no	no	no
ALDH7A1P2	ENSG00000232292	aldehyde dehydrogenase 7 family member A1 pseudogene 2 [Source:HGNC Symbol;Acc:HGNC:879]	processed_pseudogene	2:172893763-172894383:-1	0	0	0	0	0	0	0	0	0	0	0	0	0	0	0	0	0	0	0	0	0	0	0	0	0	0	0	0	0	0	0	0	0	.	.	.	.	.	.	.	.	.	no	no	no
ALDH7A1P3	ENSG00000243853	aldehyde dehydrogenase 7 family member A1 pseudogene 3 [Source:HGNC Symbol;Acc:HGNC:880]	processed_pseudogene	7:150541754-150542098:-1	1	0	0	0	0	0	0	5	15	0	21	0.035	0.247	0	0	0	0	0	0	0.062	0.107	0	0.00631	0	0	0	0	0	0	0.00122	0.00111	0	0	.	.	.	.	.	.	.	.	.	no	no	no
ALDH8A1	ENSG00000118514	aldehyde dehydrogenase 8 family member A1 [Source:HGNC Symbol;Acc:HGNC:15471]	protein_coding	6:134917393-134950115:-1	3	42	27	64	14	46	179	160	92	12	639	1.057	0.741	0.566	0.911	1.941	0.513	0.685	1.552	1.992	0.657	0.361	0.00872	0.01279	0.01328	0.02508	0.00986	0.00502	0.01282	0.019	0.00624	0.00579	0	.	.	.	.	.	.	.	.	.	no	no	no
ALDH9A1	ENSG00000143149	aldehyde dehydrogenase 9 family member A1 [Source:HGNC Symbol;Acc:HGNC:412]	protein_coding	1:165662216-165698863:-1	232	3402	1064	1803	912	4564	4469	1274	1509	192	19421	32.14	57.284	45.855	35.897	54.669	33.407	67.977	38.736	15.862	10.776	5.774	2.7473	1.45834	0.74183	1.40221	0.71515	1.80804	0.54588	0.16979	0.15194	0.10886	4	Cluster 9 (Sertoli) | Cluster 3 (myoid/Leydig) | Cluster 6 (undiff SPG) | Cluster 4 (spermatocyte)	0.573 | 0.459 | 0.547 | 0.68	0.32 | 0.302 | 0.308 | 0.277	0.253 | 0.157 | 0.239 | 0.403	0.403	1.142 | 0.613 | 0.523 | 0.835	8.809e-100 | 0.000e+00 | 6.388e-200 | 0.000e+00	4.456e-95 | 0.000e+00 | 3.231e-195 | 0.000e+00	.	yes	yes	no
ALDOA	ENSG00000149925	aldolase, fructose-bisphosphate A [Source:HGNC Symbol;Acc:HGNC:414]	protein_coding	16:30064164-30070457:1	7	262	105	127	36	78	293	188	384	104	1584	2.621	1.728	3.531	3.543	3.851	1.319	1.162	2.54	2.341	2.742	3.128	0.03587	0.07671	0.04928	0.05572	0.01649	0.00949	0.02006	0.02016	0.02534	0.04908	0	.	.	.	.	.	.	.	.	.	no	no	no
ALDOAP1	ENSG00000242849	ALDOA pseudogene 1 [Source:HGNC Symbol;Acc:HGNC:415]	processed_pseudogene	3:52193170-52194785:1	0	1	0	1	1	0	1	66	75	3	148	0.245	0	0.013	0	0.03	0.037	0	0.009	0.822	0.536	0.09	0	0.00025	0	0.00022	0.00037	0	7e-05	0.0131	0.0048	0.00116	0	.	.	.	.	.	.	.	.	.	no	no	no
ALDOAP2	ENSG00000214297	ALDOA pseudogene 2 [Source:HGNC Symbol;Acc:HGNC:416]	processed_pseudogene	10:125666875-125667950:-1	0	2	0	0	0	0	0	0	0	0	2	0.003	0	0.027	0	0	0	0	0	0	0	0	0	0.00078	0	0	0	0	0	0	0	0	0	.	.	.	.	.	.	.	.	.	no	no	no
ALDOB	ENSG00000136872	aldolase, fructose-bisphosphate B [Source:HGNC Symbol;Acc:HGNC:417]	protein_coding	9:101420560-101449664:-1	2	23	17	39	18	51	97	53	10	2	312	0.516	0.494	0.31	0.574	1.183	0.659	0.76	0.841	0.66	0.071	0.06	0.02607	0.00681	0.0066	0.01654	0.00662	0.00439	0.00697	0.00755	0.00065	0.00113	0	.	.	.	.	.	.	.	.	.	no	no	no
ALDOC	ENSG00000109107	aldolase, fructose-bisphosphate C [Source:HGNC Symbol;Acc:HGNC:418]	protein_coding	17:28573115-28576948:-1	16	406	339	128	73	25	33	32	33	6	1091	1.805	3.951	5.472	11.437	3.881	2.674	0.372	0.286	0.398	0.236	0.18	0.08141	0.11911	0.17906	0.05339	0.03553	0.00321	0.00248	0.0058	0.00299	0.00419	0	.	.	.	.	.	.	.	.	.	no	no	no
ALG1	ENSG00000033011	ALG1 chitobiosyldiphosphodolichol beta-mannosyltransferase [Source:HGNC Symbol;Acc:HGNC:18294]	protein_coding	16:5033702-5087379:1	3	537	252	538	335	1332	1304	928	631	103	5963	9.868	0.741	7.238	8.502	16.313	12.271	19.839	11.303	11.554	4.506	3.098	0.00911	0.16418	0.13457	0.24823	0.19467	0.18854	0.11583	0.14147	0.05088	0.04951	0	.	.	.	.	.	.	.	.	.	no	no	no
ALG10	ENSG00000139133	ALG10 alpha-1,2-glucosyltransferase [Source:HGNC Symbol;Acc:HGNC:23162]	protein_coding	12:34022468-34029694:1	8	58	70	115	161	440	172	25	29	3	1081	1.789	1.975	0.782	2.362	3.487	5.897	6.553	1.491	0.311	0.207	0.09	0.0547	0.01578	0.03071	0.0551	0.09976	0.05269	0.01049	0.0036	0.00326	0.00147	0	.	.	.	.	.	.	.	.	.	no	no	no
ALG10B	ENSG00000175548	ALG10 alpha-1,2-glucosyltransferase B [Source:HGNC Symbol;Acc:HGNC:31088]	protein_coding	12:38316762-38329721:1	14	314	274	328	244	489	505	219	119	22	2528	4.184	3.457	4.232	9.244	9.945	8.938	7.283	4.377	2.727	0.85	0.662	0.09991	0.09256	0.13419	0.16333	0.14078	0.06005	0.03717	0.0317	0.01275	0.01186	0	.	.	.	.	.	.	.	.	.	no	no	no
ALG11	ENSG00000253710	ALG11 alpha-1,2-mannosyltransferase [Source:HGNC Symbol;Acc:HGNC:32456]	protein_coding	13:52012391-52079232:1	5	383	235	444	318	699	923	524	162	15	3708	6.136	1.235	5.162	7.928	13.463	11.648	10.411	8	6.524	1.157	0.451	0.03514	0.11487	0.11887	0.20685	0.20742	0.08498	0.07257	0.08325	0.01705	0.0067	0	.	.	.	.	.	.	.	.	.	no	no	no
ALG12	ENSG00000182858	ALG12 alpha-1,6-mannosyltransferase [Source:HGNC Symbol;Acc:HGNC:19358]	protein_coding	22:49900229-49918438:-1	1	30	23	16	16	20	108	44	22	2	282	0.467	0.247	0.404	0.776	0.485	0.586	0.298	0.936	0.548	0.157	0.06	0.00132	0.00807	0.00901	0.00723	0.00774	0.0037	0.00722	0.00572	0.00206	0.00116	0	.	.	.	.	.	.	.	.	.	no	no	no
ALG13	ENSG00000101901	ALG13 UDP-N-acetylglucosaminyltransferase subunit [Source:HGNC Symbol;Acc:HGNC:30881]	protein_coding	X:111665811-111760649:1	63	923	730	606	478	206	1504	930	489	53	5982	9.9	15.556	12.441	24.629	18.375	17.509	3.068	13.036	11.579	3.492	1.594	0.41125	0.2814	0.43315	0.31215	0.38166	0.02867	0.11227	0.11597	0.0423	0.0349	0	.	.	.	.	.	.	.	.	.	no	no	no
ALG13-AS1	ENSG00000229487	ALG13 antisense RNA 1 [Source:HGNC Symbol;Acc:HGNC:41277]	lncRNA	X:111706649-111711101:-1	0	74	63	13	14	35	51	29	11	1	291	0.482	0	0.997	2.126	0.394	0.513	0.521	0.442	0.361	0.079	0.03	0	0.02224	0.02974	0.00695	0.00805	0.00399	0.00277	0.00629	0.00127	0.00105	0	.	.	.	.	.	.	.	.	.	no	no	no
ALG14	ENSG00000172339	ALG14 UDP-N-acetylglucosaminyltransferase subunit [Source:HGNC Symbol;Acc:HGNC:28287]	protein_coding	1:94974405-95072951:-1	46	1070	429	957	735	2844	3004	1145	877	103	11210	18.551	11.358	14.422	14.474	29.018	26.923	42.359	26.038	14.255	6.263	3.098	0.30428	0.34187	0.2453	0.50835	0.51955	0.54829	0.30405	0.15848	0.08174	0.04479	3	Cluster 6 (undiff SPG) | Cluster 8 (diff SPG/early meiosis) | Cluster 4 (spermatocyte)	0.29 | 0.269 | 0.424	0.179 | 0.182 | 0.156	0.111 | 0.087 | 0.268	0.268	0.265 | 0.274 | 0.328	1.670e-76 | 1.050e-64 | 0.000e+00	8.449e-72 | 5.312e-60 | 0.000e+00	.	no	no	no
ALG14-AS1	ENSG00000230427	ALG14 antisense RNA 1 [Source:HGNC Symbol;Acc:HGNC:41192]	lncRNA	1:95061596-95067545:1	4	27	8	23	30	98	2898	1115	678	56	4937	8.17	0.988	0.364	0.27	0.697	1.099	1.46	25.119	13.882	4.842	1.684	0.02429	0.00846	0.00196	0.01009	0.02226	0.01808	0.26027	0.16423	0.06229	0.02733	1	Cluster 1 (early spermatid 1)	0.251	0.042	0.209	0.209	0.26	0	0	early spermatid	no	no	no
ALG1L	ENSG00000189366	ALG1 chitobiosyldiphosphodolichol beta-mannosyltransferase like [Source:HGNC Symbol;Acc:HGNC:33721]	transcribed_unprocessed_pseudogene	3:125928840-125990565:-1	0	45	0	18	20	95	124	36	36	8	382	0.632	0	0.607	0	0.546	0.733	1.415	1.075	0.448	0.257	0.241	0	0.01337	0	0.00545	0.00806	0.01122	0.00893	0.00459	0.00279	0.00268	0	.	.	.	.	.	.	.	.	.	no	no	no
ALG1L13P	ENSG00000253981	ALG1 like 13, pseudogene [Source:HGNC Symbol;Acc:HGNC:44382]	transcribed_unprocessed_pseudogene	8:8236003-8244667:-1	0	2	0	1	1	1	1	0	1	0	7	0.012	0	0.027	0	0.03	0.037	0.015	0.009	0	0.007	0	0	0.00024	0	0.00116	0.00016	7e-05	0.00019	0	1e-05	0	0	.	.	.	.	.	.	.	.	.	no	no	no
ALG1L15P	ENSG00000242017	ALG1 like 15, pseudogene [Source:HGNC Symbol;Acc:HGNC:44384]	processed_pseudogene	3:156044155-156044948:-1	1	4	0	111	12	3	25	68	15	1	240	0.397	0.247	0.054	0	3.366	0.44	0.045	0.217	0.847	0.107	0.03	0.00782	0.00124	0	0.04978	0.00584	0.00092	0.00185	0.00955	0.00107	0.00087	0	.	.	.	.	.	.	.	.	.	no	no	no
ALG1L2	ENSG00000251287	ALG1 chitobiosyldiphosphodolichol beta-mannosyltransferase like 2 [Source:HGNC Symbol;Acc:HGNC:37258]	protein_coding	3:130081831-130113227:1	1	365	109	61	53	277	1045	629	72	6	2618	4.333	0.247	4.92	3.677	1.85	1.941	4.126	9.058	7.831	0.514	0.18	0.00078	0.11536	0.05526	0.02067	0.02313	0.02846	0.07743	0.09215	0.00505	0.00294	0	.	.	.	.	.	.	.	.	.	no	no	no
ALG1L5P	ENSG00000226943	ALG1 like 5, pseudogene [Source:HGNC Symbol;Acc:HGNC:44374]	unprocessed_pseudogene	7:6923804-6930835:1	0	0	0	1	3	0	1	1	2	0	8	0.013	0	0	0	0.03	0.11	0	0.009	0.012	0.014	0	0	0	0	0.00025	0.00186	0	5e-05	6e-05	0.0007	0	0	.	.	.	.	.	.	.	.	.	no	no	no
ALG1L6P	ENSG00000238278	ALG1 like 6, pseudogene [Source:HGNC Symbol;Acc:HGNC:44375]	unprocessed_pseudogene	3:75415070-75422143:1	0	0	0	0	0	0	0	0	0	0	0	0	0	0	0	0	0	0	0	0	0	0	0	0	0	0	0	0	0	0	0	0	0	.	.	.	.	.	.	.	.	.	no	no	no
ALG1L9P/ENSG00000248671	ENSG00000248671	ALG1 like 9, pseudogene [Source:NCBI gene (formerly Entrezgene);Acc:285407]	lncRNA	11:71673885-71818238:-1	2	272	109	133	125	289	396	440	148	12	1926	3.187	0.494	3.666	3.677	4.033	4.579	4.304	3.432	5.478	1.057	0.361	0.00542	0.08203	0.05525	0.0506	0.0785	0.03144	0.03406	0.06936	0.01162	0.00642	0	.	.	.	.	.	.	.	.	.	no	no	no
ALG1L9P/ENSG00000254978	ENSG00000254978	ALG1 like 9, pseudogene [Source:HGNC Symbol;Acc:HGNC:44378]	transcribed_unprocessed_pseudogene	11:71800541-71804640:-1	0	0	0	0	0	0	2	3	0	0	5	0.008	0	0	0	0	0	0	0.017	0.037	0	0	0	0	0	0	0	0	9e-05	0.00021	0	0	0	.	.	.	.	.	.	.	.	.	no	no	no
ALG2	ENSG00000119523	ALG2 alpha-1,3/1,6-mannosyltransferase [Source:HGNC Symbol;Acc:HGNC:23159]	protein_coding	9:99216425-99221942:-1	27	930	336	517	513	706	2084	1806	1435	71	8425	13.942	6.667	12.535	11.336	15.676	18.791	10.515	18.064	22.485	10.248	2.135	0.18433	0.26329	0.16093	0.26038	0.32358	0.10153	0.17619	0.24072	0.11756	0.03849	0	.	.	.	.	.	.	.	.	.	no	no	no
ALG3	ENSG00000214160	ALG3 alpha-1,3- mannosyltransferase [Source:HGNC Symbol;Acc:HGNC:23056]	protein_coding	3:184242301-184249548:-1	65	633	412	1312	681	2425	2393	2706	3996	1145	15768	26.094	16.049	8.532	13.9	39.782	24.945	36.119	20.742	33.69	28.537	34.436	0.49536	0.18027	0.20619	0.81324	0.48082	0.42944	0.21005	0.4696	0.39214	0.81495	2	Cluster 6 (undiff SPG) | Cluster 5 (late spermatid 2)	0.398 | 0.344	0.253 | 0.256	0.145 | 0.088	0.145	0.412 | 0.413	1.893e-157 | 9.047e-183	9.577e-153 | 4.576e-178	.	no	no	no
ALG3P1	ENSG00000251568	ALG3 pseudogene 1 [Source:HGNC Symbol;Acc:HGNC:45159]	processed_pseudogene	5:5375723-5376836:-1	0	0	0	0	0	0	0	2	1	0	3	0.005	0	0	0	0	0	0	0	0.025	0.007	0	0	0	0	0	0	0	0	0.00056	2e-05	0	0	.	.	.	.	.	.	.	.	.	no	no	no
ALG5	ENSG00000120697	ALG5 dolichyl-phosphate beta-glucosyltransferase [Source:HGNC Symbol;Acc:HGNC:20266]	protein_coding	13:36949738-37000763:-1	58	1820	896	616	1024	3734	4453	2279	1448	183	16511	27.324	14.321	24.532	30.229	18.678	37.509	55.615	38.598	28.374	10.341	5.504	0.44742	0.6123	0.58674	0.32328	0.81928	0.92294	0.49674	0.37156	0.12932	0.10869	2	Cluster 8 (diff SPG/early meiosis) | Cluster 4 (spermatocyte)	0.375 | 0.556	0.268 | 0.238	0.107 | 0.318	0.318	0.351 | 0.474	1.749e-83 | 0.000e+00	8.848e-79 | 0.000e+00	.	no	no	no
ALG6	ENSG00000088035	ALG6 alpha-1,3-glucosyltransferase [Source:HGNC Symbol;Acc:HGNC:23157]	protein_coding	1:63367575-63438553:1	6	282	205	330	549	574	409	211	162	11	2739	4.533	1.481	3.801	6.916	10.006	20.11	8.549	3.545	2.627	1.157	0.331	0.037	0.07819	0.08872	0.15286	0.36028	0.07934	0.03103	0.03351	0.01523	0.00644	0	.	.	.	.	.	.	.	.	.	no	no	no
ALG8	ENSG00000159063	ALG8 alpha-1,3-glucosyltransferase [Source:HGNC Symbol;Acc:HGNC:23161]	protein_coding	11:78095244-78139660:-1	33	935	489	1009	1189	4065	3399	1075	553	63	12810	21.199	8.148	12.603	16.498	30.594	43.553	60.545	29.462	13.384	3.949	1.895	0.22099	0.29949	0.26757	0.5492	1.03824	1.35253	0.33804	0.16939	0.05836	0.03537	2	Cluster 8 (diff SPG/early meiosis) | Cluster 4 (spermatocyte)	0.436 | 0.605	0.201 | 0.163	0.235 | 0.442	0.442	0.594 | 0.901	2.186e-220 | 0.000e+00	1.106e-215 | 0.000e+00	.	no	no	no
ALG9	ENSG00000086848	ALG9 alpha-1,2-mannosyltransferase [Source:HGNC Symbol;Acc:HGNC:15672]	protein_coding	11:111782195-111871581:-1	4	346	242	367	215	462	845	710	323	41	3555	5.883	0.988	4.664	8.165	11.128	7.875	6.881	7.324	8.84	2.307	1.233	0.01589	0.09959	0.12056	0.16462	0.11872	0.05021	0.06032	0.10216	0.02632	0.02112	0	.	.	.	.	.	.	.	.	.	no	no	no
ALG9-IT1	ENSG00000254450	ALG9 intronic transcript 1 [Source:HGNC Symbol;Acc:HGNC:41409]	lncRNA	11:111817214-111829212:-1	0	11	7	11	7	8	20	35	4	0	103	0.17	0	0.148	0.236	0.334	0.256	0.119	0.173	0.436	0.029	0	0	0.00291	0.00441	0.00346	0.00464	0.00057	0.00085	0.00596	0.00068	0	0	.	.	.	.	.	.	.	.	.	no	no	no
ALK	ENSG00000171094	ALK receptor tyrosine kinase [Source:HGNC Symbol;Acc:HGNC:427]	protein_coding	2:29192774-29921586:-1	4	43	14	59	34	173	1457	2518	2616	293	7211	11.933	0.988	0.58	0.472	1.789	1.245	2.577	12.629	31.35	18.682	8.812	0.05621	0.0129	0.00549	0.02569	0.01663	0.0284	0.12578	0.42981	0.21666	0.16074	1	Cluster 2 (early spermatid 2)	0.313	0.09	0.223	0.223	0.372	0	0	early spermatid	no	no	no
ALKAL1	ENSG00000196711	ALK and LTK ligand 1 [Source:HGNC Symbol;Acc:HGNC:33775]	protein_coding	8:52534037-52565430:-1	0	4	1	113	2	22	20	8	6	2	178	0.295	0	0.054	0.034	3.426	0.073	0.328	0.173	0.1	0.043	0.06	0	0.00077	0.00037	0.05263	0.00227	0.00289	0.00153	0.00086	0.0003	0.00088	0	.	.	.	.	.	.	.	.	.	no	no	no
ALKAL2	ENSG00000189292	ALK and LTK ligand 2 [Source:HGNC Symbol;Acc:HGNC:27683]	protein_coding	2:279558-288851:-1	13	1183	65	2118	342	4360	2412	1856	1247	152	13748	22.751	3.21	15.946	2.193	64.221	12.527	64.939	20.907	23.108	8.905	4.571	0.08865	0.47853	0.04049	2.18753	0.22537	1.98929	0.28382	0.28283	0.1211	0.0916	2	Cluster 6 (undiff SPG) | Cluster 4 (spermatocyte)	0.642 | 0.649	0.204 | 0.175	0.438 | 0.474	0.474	1.145 | 1.141	0.000e+00 | 0.000e+00	0.000e+00 | 0.000e+00	.	no	no	no
ALKBH1	ENSG00000100601	alkB homolog 1, histone H2A dioxygenase [Source:HGNC Symbol;Acc:HGNC:17911]	protein_coding	14:77672404-77708023:-1	9	252	170	632	413	1692	1178	156	212	22	4736	7.838	2.222	3.397	5.735	19.163	15.128	25.201	10.211	1.942	1.514	0.662	0.06635	0.07374	0.07418	0.30877	0.26237	0.23	0.09177	0.01593	0.02171	0.01207	0	.	.	.	.	.	.	.	.	.	no	no	no
ALKBH2	ENSG00000189046	alkB homolog 2, alpha-ketoglutarate dependent dioxygenase [Source:HGNC Symbol;Acc:HGNC:32487]	protein_coding	12:109088188-109093631:-1	24	1116	370	816	592	1176	1176	482	219	14	5985	9.905	5.926	15.042	12.483	24.742	21.685	17.516	10.193	6.001	1.564	0.421	0.12775	0.36103	0.19989	0.45186	0.42207	0.16567	0.09142	0.05234	0.02518	0.00755	0	.	.	.	.	.	.	.	.	.	no	no	no
ALKBH3	ENSG00000166199	alkB homolog 3, alpha-ketoglutarate dependent dioxygenase [Source:HGNC Symbol;Acc:HGNC:30141]	protein_coding	11:43880811-43920274:1	43	720	329	770	441	2656	3777	2594	3289	112	14731	24.378	10.617	9.705	11.1	23.347	16.154	39.559	32.738	32.296	23.488	3.368	0.36193	0.20979	0.17752	0.39413	0.27106	0.46978	0.39367	0.40947	0.32387	0.05945	0	.	.	.	.	.	.	.	.	.	no	no	no
ALKBH3-AS1	ENSG00000244926	ALKBH3 antisense RNA 1 [Source:HGNC Symbol;Acc:HGNC:48670]	lncRNA	11:43909289-43920944:-1	10	44	19	45	42	143	3663	2794	1761	206	8727	14.442	2.469	0.593	0.641	1.364	1.538	2.13	31.75	34.786	12.576	6.195	0.07365	0.01266	0.00765	0.02512	0.02337	0.02347	0.44351	0.50886	0.15725	0.11908	1	Cluster 1 (early spermatid 1) | Cluster 2 (early spermatid 2)	0.318 | 0.348	0.104 | 0.113	0.214 | 0.235	0.235	0.333 | 0.385	0.000e+00 | 0.000e+00	0.000e+00 | 0.000e+00	early spermatid	no	no	no
ALKBH4	ENSG00000160993	alkB homolog 4, lysine demethylase [Source:HGNC Symbol;Acc:HGNC:21900]	protein_coding	7:102456238-102464863:-1	13	678	291	217	388	899	402	141	111	8	3148	5.21	3.21	9.139	9.818	6.58	14.212	13.39	3.484	1.755	0.793	0.241	0.06013	0.19711	0.13775	0.09861	0.24867	0.11729	0.03132	0.02056	0.00983	0.00406	0	.	.	.	.	.	.	.	.	.	no	no	no
ALKBH5	ENSG00000091542	alkB homolog 5, RNA demethylase [Source:HGNC Symbol;Acc:HGNC:25996]	protein_coding	17:18183078-18209954:1	69	1585	739	2305	1206	3497	2539	2114	2218	234	16506	27.316	17.037	21.364	24.933	69.891	44.176	52.085	22.007	26.32	15.839	7.038	0.52931	0.50406	0.41249	2.62033	1.18478	0.86893	0.23017	0.39244	0.21105	0.13888	3	Cluster 6 (undiff SPG) | Cluster 8 (diff SPG/early meiosis) | Cluster 4 (spermatocyte)	0.699 | 0.442 | 0.521	0.249 | 0.265 | 0.242	0.450 | 0.177 | 0.279	0.45	1.360 | 0.542 | 0.328	0.000e+00 | 1.406e-160 | 0.000e+00	0.000e+00 | 7.112e-156 | 0.000e+00	.	no	no	no
ALKBH6	ENSG00000239382	alkB homolog 6 [Source:HGNC Symbol;Acc:HGNC:28243]	protein_coding	19:36009120-36014239:-1	3	233	198	173	60	299	502	227	195	7	1897	3.139	0.741	3.141	6.68	5.246	2.198	4.453	4.351	2.826	1.393	0.211	0.00545	0.07007	0.09263	0.07491	0.02931	0.03083	0.03523	0.02866	0.01589	0.00475	0	.	.	.	.	.	.	.	.	.	no	no	no
ALKBH7	ENSG00000125652	alkB homolog 7 [Source:HGNC Symbol;Acc:HGNC:21306]	protein_coding	19:6372794-6375250:1	286	3329	1650	2356	1879	6678	11394	7659	13880	3216	52327	86.595	70.617	44.871	55.668	71.437	68.828	99.464	98.761	95.356	99.122	96.722	5.69221	1.81258	1.73689	3.38443	4.58183	31.1249	24.5394	14.5224	23.1861	24.0403	3	Cluster 4 (spermatocyte) | Cluster 1 (early spermatid 1) | Cluster 0 (late spermatid 1) | Cluster 5 (late spermatid 2)	0.995 | 0.988 | 0.991 | 0.967	0.85 | 0.837 | 0.828 | 0.86	0.145 | 0.151 | 0.163 | 0.107	0.163	0.935 | 0.600 | 0.526 | 0.466	0.000e+00 | 0.000e+00 | 0.000e+00 | 3.918e-152	0.000e+00 | 0.000e+00 | 0.000e+00 | 1.982e-147	.	no	no	no
ALKBH8	ENSG00000137760	alkB homolog 8, tRNA methyltransferase [Source:HGNC Symbol;Acc:HGNC:25189]	protein_coding	11:107502727-107565742:-1	14	192	151	122	119	137	63	46	47	6	897	1.484	3.457	2.588	5.094	3.699	4.359	2.041	0.546	0.573	0.336	0.18	0.08881	0.05154	0.06657	0.05557	0.065	0.01938	0.00554	0.00429	0.00503	0.00202	0	.	.	.	.	.	.	.	.	.	no	no	no
ALLC	ENSG00000151360	allantoicase [Source:HGNC Symbol;Acc:HGNC:17377]	protein_coding	2:3658200-3702671:1	19	431	20	204	106	666	6382	4093	2526	93	14540	24.062	4.691	5.809	0.675	6.186	3.883	9.92	55.318	50.959	18.039	2.797	0.12777	0.12581	0.01308	0.0989	0.07137	0.11379	0.94983	0.88341	0.24214	0.04852	1	Cluster 1 (early spermatid 1) | Cluster 2 (early spermatid 2)	0.553 | 0.51	0.167 | 0.199	0.386 | 0.311	0.386	0.624 | 0.512	0.000e+00 | 0.000e+00	0.000e+00 | 0.000e+00	early spermatid	no	no	no
ALMS1	ENSG00000116127	ALMS1 centrosome and basal body associated protein [Source:HGNC Symbol;Acc:HGNC:428]	protein_coding	2:73385758-73625166:1	43	710	420	893	689	2470	4106	3374	4663	1105	18473	30.571	10.617	9.57	14.17	27.077	25.238	36.789	35.59	42.007	33.3	33.233	0.33913	0.22741	0.24304	0.49786	0.52632	0.45961	0.53718	0.87345	0.61375	0.94993	2	Cluster 2 (early spermatid 2) | Cluster 5 (late spermatid 2)	0.42 | 0.332	0.288 | 0.304	0.132 | 0.028	0.132	0.312 | 0.346	1.753e-129 | 3.421e-110	8.865e-125 | 1.730e-105	.	no	no	no
ALMS1-IT1	ENSG00000230002	ALMS1 intronic transcript 1 [Source:HGNC Symbol;Acc:HGNC:41305]	lncRNA	2:73456764-73459482:1	1	44	24	51	41	75	143	250	32	1	662	1.096	0.247	0.593	0.81	1.546	1.502	1.117	1.239	3.113	0.229	0.03	0.01188	0.01315	0.01075	0.01883	0.02387	0.00641	0.0099	0.03663	0.00202	0.00078	0	.	.	.	.	.	.	.	.	.	no	no	no
ALMS1P1	ENSG00000163016	ALMS1 pseudogene 1 [Source:HGNC Symbol;Acc:HGNC:29586]	transcribed_unprocessed_pseudogene	2:73641083-73697509:1	2	90	51	159	68	175	1504	293	186	19	2547	4.215	0.494	1.213	1.721	4.821	2.491	2.606	13.036	3.648	1.328	0.571	0.02083	0.0267	0.02236	0.06658	0.0345	0.02203	0.14171	0.0398	0.01714	0.01215	0	.	.	.	.	.	.	.	.	.	no	no	no
ALOX12	ENSG00000108839	arachidonate 12-lipoxygenase, 12S type [Source:HGNC Symbol;Acc:HGNC:429]	protein_coding	17:6996049-7010754:1	1	33	11	43	12	75	101	32	36	5	349	0.578	0.247	0.445	0.371	1.304	0.44	1.117	0.875	0.398	0.257	0.15	0.0163	0.00921	0.00443	0.01462	0.00717	0.00952	0.00643	0.00334	0.00262	0.00178	0	.	.	.	.	.	.	.	.	.	no	no	no
ALOX12-AS1	ENSG00000215067	ALOX12 antisense RNA 1 [Source:HGNC Symbol;Acc:HGNC:51342]	lncRNA	17:6875232-7012530:-1	20	712	442	399	291	1749	1871	1506	1751	199	8940	14.795	4.938	9.597	14.912	12.098	10.659	26.05	16.217	18.75	12.504	5.985	0.12802	0.24007	0.28185	0.18487	0.16474	0.24562	0.15216	0.24023	0.14475	0.09898	0	.	.	.	.	.	.	.	.	.	no	no	no
ALOX12B	ENSG00000179477	arachidonate 12-lipoxygenase, 12R type [Source:HGNC Symbol;Acc:HGNC:430]	protein_coding	17:8072636-8087716:-1	0	0	1	13	49	44	130	40	70	1	348	0.576	0	0	0.034	0.394	1.795	0.655	1.127	0.498	0.5	0.03	0	0	8e-05	0.005	0.02923	0.00481	0.01121	0.00399	0.00561	0.00037	0	.	.	.	.	.	.	.	.	.	no	no	no
ALOX12P1	ENSG00000264958	arachidonate 12-lipoxygenase pseudogene 1 [Source:HGNC Symbol;Acc:HGNC:431]	unprocessed_pseudogene	17:30529688-30542416:1	0	0	1	0	1	8	30	21	21	1	83	0.137	0	0	0.034	0	0.037	0.119	0.26	0.261	0.15	0.03	0	0	0.00012	0	0.00011	0.00078	0.00157	0.00245	0.00199	0.00069	0	.	.	.	.	.	.	.	.	.	no	no	no
ALOX12P2	ENSG00000262943	arachidonate 12-lipoxygenase pseudogene 2 [Source:HGNC Symbol;Acc:HGNC:432]	transcribed_unprocessed_pseudogene	17:6853861-6954107:1	2	54	27	75	51	214	788	913	631	26	2781	4.602	0.494	0.728	0.911	2.274	1.868	3.187	6.83	11.367	4.506	0.782	0.015	0.01717	0.01346	0.03032	0.02987	0.0255	0.06561	0.13201	0.0483	0.01388	0	.	.	.	.	.	.	.	.	.	no	no	no
ALOX15	ENSG00000161905	arachidonate 15-lipoxygenase [Source:HGNC Symbol;Acc:HGNC:433]	protein_coding	17:4630919-4642294:-1	2	15	3	91	45	193	2775	644	105	11	3884	6.428	0.494	0.202	0.101	2.759	1.648	2.875	24.053	8.018	0.75	0.331	0.01339	0.00638	0.00074	0.03763	0.02028	0.02541	0.239	0.06793	0.01146	0.0055	0	.	.	.	.	.	.	.	.	.	no	no	no
ALOX15B	ENSG00000179593	arachidonate 15-lipoxygenase type B [Source:HGNC Symbol;Acc:HGNC:434]	protein_coding	17:8039034-8049134:1	0	15	58	57	23	123	126	60	50	11	523	0.866	0	0.202	1.957	1.728	0.842	1.832	1.092	0.747	0.357	0.331	0	0.00456	0.04031	0.0191	0.01335	0.0108	0.00774	0.00724	0.00334	0.00321	0	.	.	.	.	.	.	.	.	.	no	no	no
ALOX15P1	ENSG00000274114	arachidonate 15-lipoxygenase pseudogene 1 [Source:HGNC Symbol;Acc:HGNC:13742]	transcribed_unprocessed_pseudogene	17:6657034-6693577:1	0	53	44	61	52	515	719	195	158	19	1816	3.005	0	0.714	1.484	1.85	1.905	7.671	6.232	2.428	1.128	0.571	0	0.01501	0.02214	0.02324	0.02882	0.06395	0.06248	0.02324	0.01383	0.00851	0	.	.	.	.	.	.	.	.	.	no	no	no
ALOX15P2	ENSG00000188101	arachidonate 15-lipoxygenase pseudogene 2 [Source:HGNC Symbol;Acc:HGNC:39027]	unprocessed_pseudogene	9:92913156-92921560:1	0	0	0	18	3	3	4	13	3	2	46	0.076	0	0	0	0.546	0.11	0.045	0.035	0.162	0.021	0.06	0	0	0	0.0068	0.00253	0.00012	0.00045	0.00189	0.00021	0.00066	0	.	.	.	.	.	.	.	.	.	no	no	no
ALOX5	ENSG00000012779	arachidonate 5-lipoxygenase [Source:HGNC Symbol;Acc:HGNC:435]	protein_coding	10:45374176-45446119:1	2	14	217	79	20	10	15	90	94	17	558	0.923	0.494	0.189	7.321	2.395	0.733	0.149	0.13	1.121	0.671	0.511	0.0096	0.00396	0.21568	0.03155	0.00959	0.00137	0.0009	0.01164	0.00716	0.00994	0	.	.	.	.	.	.	.	.	.	no	no	no
ALOX5AP	ENSG00000132965	arachidonate 5-lipoxygenase activating protein [Source:HGNC Symbol;Acc:HGNC:436]	protein_coding	13:30713478-30764426:1	3	165	518	101	14	37	622	367	236	17	2080	3.442	0.741	2.224	17.476	3.062	0.513	0.551	5.391	4.569	1.685	0.511	0.02843	0.06011	1.98065	0.04267	0.00724	0.00681	0.04753	0.04212	0.02097	0.00781	0	.	.	.	.	.	.	.	.	.	no	no	no
ALOXE3	ENSG00000179148	arachidonate lipoxygenase 3 [Source:HGNC Symbol;Acc:HGNC:13743]	protein_coding	17:8095900-8119047:-1	0	1	1	118	56	33	17	19	27	6	278	0.46	0	0.013	0.034	3.578	2.051	0.492	0.147	0.237	0.193	0.18	0	0.0001	0.00036	0.04136	0.03116	0.00412	0.00084	0.00219	0.00147	0.0039	0	.	.	.	.	.	.	.	.	.	no	no	no
ALOXE3P1	ENSG00000275011	arachidonate lipoxygenase 3 pseudogene 1 [Source:HGNC Symbol;Acc:HGNC:44238]	unprocessed_pseudogene	17:8063936-8072533:1	0	0	0	0	0	0	0	12	20	0	32	0.053	0	0	0	0	0	0	0	0.149	0.143	0	0	0	0	0	0	0	0	0.00198	0.00145	0	0	.	.	.	.	.	.	.	.	.	no	no	no
ALPG	ENSG00000163286	alkaline phosphatase, germ cell [Source:HGNC Symbol;Acc:HGNC:441]	protein_coding	2:232406844-232410714:1	0	0	0	89	26	7	3	14	14	1	154	0.255	0	0	0	2.699	0.952	0.104	0.026	0.174	0.1	0.03	0	0	0	0.03548	0.01586	0.00045	9e-05	0.00254	0.00105	0.00013	0	.	.	.	.	.	.	.	.	.	no	no	no
ALPI	ENSG00000163295	alkaline phosphatase, intestinal [Source:HGNC Symbol;Acc:HGNC:437]	protein_coding	2:232456125-232460753:1	0	0	0	21	1	0	0	5	3	1	31	0.051	0	0	0	0.637	0.037	0	0	0.062	0.021	0.03	0	0	0	0.00949	0.00057	0	0	0.0006	0.00027	0.00031	0	.	.	.	.	.	.	.	.	.	no	no	no
ALPK1	ENSG00000073331	alpha kinase 1 [Source:HGNC Symbol;Acc:HGNC:20917]	protein_coding	4:112285509-112442621:1	7	380	306	264	108	232	1726	841	346	25	4235	7.008	1.728	5.122	10.324	8.005	3.956	3.455	14.961	10.471	2.471	0.752	0.01627	0.11166	0.15409	0.12308	0.06643	0.02905	0.1554	0.1375	0.02989	0.01296	0	.	.	.	.	.	.	.	.	.	no	no	no
ALPK2	ENSG00000198796	alpha kinase 2 [Source:HGNC Symbol;Acc:HGNC:20565]	protein_coding	18:58481247-58629091:-1	2	30	15	72	41	307	546	1333	1539	127	4012	6.639	0.494	0.404	0.506	2.183	1.502	4.573	4.733	16.596	10.991	3.82	0.01999	0.0086	0.01003	0.03419	0.01805	0.03253	0.03915	0.20006	0.13201	0.06794	0	.	.	.	.	.	.	.	.	.	no	no	no
ALPK3	ENSG00000136383	alpha kinase 3 [Source:HGNC Symbol;Acc:HGNC:17574]	protein_coding	15:84817356-84873479:1	0	32	24	110	70	22	31	48	52	6	395	0.654	0	0.431	0.81	3.335	2.564	0.328	0.269	0.598	0.371	0.18	0	0.00767	0.01038	0.05088	0.04069	0.00301	0.00177	0.00773	0.00415	0.0031	0	.	.	.	.	.	.	.	.	.	no	no	no
ALPL	ENSG00000162551	alkaline phosphatase, biomineralization associated [Source:HGNC Symbol;Acc:HGNC:438]	protein_coding	1:21509397-21578410:1	2	11	383	505	143	15	24	80	209	41	1413	2.338	0.494	0.148	12.922	15.312	5.238	0.223	0.208	0.996	1.493	1.233	0.02093	0.00301	0.40149	0.23242	0.08331	0.00287	0.00214	0.01067	0.01662	0.02342	0	.	.	.	.	.	.	.	.	.	no	no	no
ALPP	ENSG00000163283	alkaline phosphatase, placental [Source:HGNC Symbol;Acc:HGNC:439]	protein_coding	2:232378724-232382889:1	0	14	8	25	6	5	19	8	3	0	88	0.146	0	0.189	0.27	0.758	0.22	0.074	0.165	0.1	0.021	0	0	0.00528	0.00522	0.00992	0.00171	0.00025	0.00155	0.00067	0.00015	0	0	.	.	.	.	.	.	.	.	.	no	no	no
ALS2	ENSG00000003393	alsin Rho guanine nucleotide exchange factor ALS2 [Source:HGNC Symbol;Acc:HGNC:443]	protein_coding	2:201700267-201782112:-1	15	1019	635	941	406	1525	2843	2919	1669	98	12070	19.975	3.704	13.735	21.424	28.532	14.872	22.714	24.642	36.342	11.919	2.947	0.1081	0.34867	0.36883	0.52992	0.25472	0.20746	0.27064	0.70904	0.15946	0.0525	1	Cluster 2 (early spermatid 2)	0.363	0.175	0.188	0.188	0.451	0	0	early spermatid	no	no	no
ALS2CL	ENSG00000178038	ALS2 C-terminal like [Source:HGNC Symbol;Acc:HGNC:20605]	protein_coding	3:46668995-46693704:-1	0	70	196	82	57	39	55	102	58	8	667	1.104	0	0.944	6.613	2.486	2.088	0.581	0.477	1.27	0.414	0.241	0	0.02245	0.09858	0.03449	0.03348	0.00327	0.00385	0.01738	0.00422	0.00316	0	.	.	.	.	.	.	.	.	.	no	no	no
ALX1	ENSG00000180318	ALX homeobox 1 [Source:HGNC Symbol;Acc:HGNC:1494]	protein_coding	12:85280220-85301784:1	1	4	2	11	9	198	312	218	71	12	838	1.387	0.247	0.054	0.067	0.334	0.33	2.949	2.704	2.714	0.507	0.361	0.00184	0.00103	0.00076	0.00451	0.00388	0.0165	0.02201	0.02826	0.00592	0.00811	0	.	.	.	.	.	.	.	.	.	no	no	no
ALX4	ENSG00000052850	ALX homeobox 4 [Source:HGNC Symbol;Acc:HGNC:450]	protein_coding	11:44260440-44310139:-1	0	102	1	13	3	1	3	37	42	5	207	0.343	0	1.375	0.034	0.394	0.11	0.015	0.026	0.461	0.3	0.15	0	0.03067	7e-05	0.00604	0.00628	4e-05	8e-05	0.00427	0.00364	0.00181	0	.	.	.	.	.	.	.	.	.	no	no	no
ALYREF	ENSG00000183684	Aly/REF export factor [Source:HGNC Symbol;Acc:HGNC:19071]	protein_coding	17:81887835-81891586:-1	41	612	397	713	716	2079	1002	432	481	42	6515	10.782	10.123	8.249	13.394	21.619	26.227	30.965	8.685	5.378	3.435	1.263	0.24851	0.15899	0.19476	0.3761	0.54051	0.51533	0.06851	0.04847	0.04626	0.02731	2	Cluster 8 (diff SPG/early meiosis) | Cluster 4 (spermatocyte)	0.262 | 0.31	0.101 | 0.083	0.161 | 0.227	0.227	0.426 | 0.435	5.676e-165 | 0.000e+00	2.871e-160 | 0.000e+00	.	no	no	no
AMACR	ENSG00000242110	alpha-methylacyl-CoA racemase [Source:HGNC Symbol;Acc:HGNC:451]	protein_coding	5:33986165-34008104:-1	2	55	36	49	22	43	305	414	780	141	1847	3.057	0.494	0.741	1.215	1.486	0.806	0.64	2.644	5.154	5.57	4.241	0.00807	0.01522	0.01086	0.02228	0.01037	0.00491	0.02391	0.04457	0.05705	0.07424	0	.	.	.	.	.	.	.	.	.	no	no	no
AMBN	ENSG00000178522	ameloblastin [Source:HGNC Symbol;Acc:HGNC:452]	protein_coding	4:70592256-70607288:1	0	0	0	32	0	0	0	2	3	0	37	0.061	0	0	0	0.97	0	0	0	0.025	0.021	0	0	0	0	0.01036	0	0	0	0.00011	0.00026	0	0	.	.	.	.	.	.	.	.	.	no	no	no
AMBP	ENSG00000106927	alpha-1-microglobulin/bikunin precursor [Source:HGNC Symbol;Acc:HGNC:453]	protein_coding	9:114060127-114078328:-1	2	16	13	68	19	45	108	1105	2865	130	4371	7.234	0.494	0.216	0.439	2.062	0.696	0.67	0.936	13.757	20.46	3.91	0.01257	0.00357	0.00426	0.02925	0.00868	0.00829	0.00879	0.15888	0.26441	0.0705	0	.	.	.	.	.	.	.	.	.	no	no	no
AMBRA1	ENSG00000110497	autophagy and beclin 1 regulator 1 [Source:HGNC Symbol;Acc:HGNC:25990]	protein_coding	11:46396414-46594125:-1	20	197	117	253	66	356	1125	820	442	52	3448	5.706	4.938	2.655	3.947	7.671	2.418	5.302	9.751	10.209	3.156	1.564	0.13127	0.05429	0.04869	0.1164	0.03966	0.0421	0.09087	0.11281	0.03635	0.02745	0	.	.	.	.	.	.	.	.	.	no	no	no
AMD1	ENSG00000123505	adenosylmethionine decarboxylase 1 [Source:HGNC Symbol;Acc:HGNC:457]	protein_coding	6:110874770-110898879:1	143	2107	1059	2031	1466	3594	3820	1785	2076	353	18434	30.506	35.309	28.4	35.729	61.583	53.7	53.53	33.111	22.224	14.825	10.617	1.27922	0.75834	0.98954	1.68614	1.4177	0.83378	0.37876	0.26195	0.19294	0.20103	5	Cluster 9 (Sertoli) | Cluster 7 (endothelia/macrophage) | Cluster 6 (undiff SPG) | Cluster 8 (diff SPG/early meiosis) | Cluster 4 (spermatocyte)	0.353 | 0.357 | 0.616 | 0.537 | 0.535	0.305 | 0.302 | 0.287 | 0.294 | 0.276	0.048 | 0.055 | 0.329 | 0.243 | 0.259	0.329	0.550 | 0.370 | 0.844 | 0.668 | 0.263	1.451e-35 | 1.451e-65 | 0.000e+00 | 5.753e-269 | 0.000e+00	7.338e-31 | 7.337e-61 | 0.000e+00 | 2.910e-264 | 0.000e+00	.	yes	no	yes
AMD1P1	ENSG00000228339	adenosylmethionine decarboxylase 1 pseudogene 1 [Source:HGNC Symbol;Acc:HGNC:44898]	processed_pseudogene	10:20350049-20351100:1	0	1	0	1	0	0	2	3	0	0	7	0.012	0	0.013	0	0.03	0	0	0.017	0.037	0	0	0	8e-05	0	0.00019	0	0	8e-05	0.00016	0	0	0	.	.	.	.	.	.	.	.	.	no	no	no
AMD1P3	ENSG00000249286	adenosylmethionine decarboxylase 1 pseudogene 3 [Source:HGNC Symbol;Acc:HGNC:51608]	processed_pseudogene	5:43586918-43588223:-1	0	4	2	0	0	0	61	6	3	1	77	0.127	0	0.054	0.067	0	0	0	0.529	0.075	0.021	0.03	0	0.00145	0.0008	0	0	0	0.00445	0.00054	0.00013	0.00028	0	.	.	.	.	.	.	.	.	.	no	no	no
AMD1P4	ENSG00000215124	adenosylmethionine decarboxylase 1 pseudogene 4 [Source:HGNC Symbol;Acc:HGNC:51609]	processed_pseudogene	6:11861626-11862970:-1	0	36	29	71	28	64	110	50	35	2	425	0.703	0	0.485	0.978	2.153	1.026	0.953	0.953	0.623	0.25	0.06	0	0.0103	0.01196	0.02899	0.01701	0.00677	0.00975	0.00957	0.00317	0.00139	0	.	.	.	.	.	.	.	.	.	no	no	no
AMDHD1	ENSG00000139344	amidohydrolase domain containing 1 [Source:HGNC Symbol;Acc:HGNC:28577]	protein_coding	12:95943331-95968720:1	1	8	56	177	109	71	353	146	170	7	1098	1.817	0.247	0.108	1.889	5.367	3.993	1.057	3.06	1.818	1.214	0.211	0.00889	0.00269	0.02541	0.08046	0.06743	0.00703	0.0275	0.01488	0.01141	0.00427	0	.	.	.	.	.	.	.	.	.	no	no	no
AMDHD2	ENSG00000162066	amidohydrolase domain containing 2 [Source:HGNC Symbol;Acc:HGNC:24262]	protein_coding	16:2520357-2531422:1	32	243	149	747	334	4098	5661	2045	1538	99	14946	24.734	7.901	3.275	5.027	22.65	12.234	61.037	49.068	25.461	10.983	2.977	0.2126	0.07027	0.08397	0.39406	0.20554	1.26016	0.7722	0.28274	0.14744	0.05918	2	Cluster 4 (spermatocyte) | Cluster 1 (early spermatid 1)	0.61 | 0.491	0.202 | 0.19	0.408 | 0.301	0.408	0.797 | 0.424	0.000e+00 | 0.000e+00	0.000e+00 | 0.000e+00	.	no	no	no
AMELX	ENSG00000125363	amelogenin X-linked [Source:HGNC Symbol;Acc:HGNC:461]	protein_coding	X:11293413-11300761:1	0	4	0	4	2	0	4	4	3	0	21	0.035	0	0.054	0	0.121	0.073	0	0.035	0.05	0.021	0	0	0.00144	0	0.00273	0.00192	0	0.00016	0.00062	0.00015	0	0	.	.	.	.	.	.	.	.	.	no	no	no
AMELY	ENSG00000099721	amelogenin Y-linked [Source:HGNC Symbol;Acc:HGNC:462]	protein_coding	Y:6865918-6911752:-1	0	0	0	23	5	0	1	0	5	1	35	0.058	0	0	0	0.697	0.183	0	0.009	0	0.036	0.03	0	0	0	0.00935	0.00186	0	0.00037	0	0.00053	0.00029	0	.	.	.	.	.	.	.	.	.	no	no	no
AMER1	ENSG00000184675	APC membrane recruitment protein 1 [Source:HGNC Symbol;Acc:HGNC:26837]	protein_coding	X:64185117-64205708:-1	3	122	44	24	9	5	19	10	12	1	249	0.412	0.741	1.644	1.484	0.728	0.33	0.074	0.165	0.125	0.086	0.03	0.01494	0.03658	0.01562	0.012	0.00545	0.00092	0.00138	0.00128	0.00091	0.0008	0	.	.	.	.	.	.	.	.	.	no	no	no
AMER2	ENSG00000165566	APC membrane recruitment protein 2 [Source:HGNC Symbol;Acc:HGNC:26360]	protein_coding	13:25161679-25172288:-1	1	36	21	247	41	571	911	384	266	35	2513	4.159	0.247	0.485	0.709	7.489	1.502	8.505	7.896	4.781	1.9	1.053	0.00816	0.00918	0.00728	0.11287	0.02093	0.06625	0.06796	0.05247	0.02012	0.01614	0	.	.	.	.	.	.	.	.	.	no	no	no
AMER3	ENSG00000178171	APC membrane recruitment protein 3 [Source:HGNC Symbol;Acc:HGNC:26771]	protein_coding	2:130755540-130768134:1	0	16	17	182	32	42	117	78	14	1	499	0.826	0	0.216	0.574	5.518	1.172	0.626	1.014	0.971	0.1	0.03	0	0.00452	0.00969	0.08816	0.01649	0.00525	0.00979	0.01263	0.00143	0.00055	0	.	.	.	.	.	.	.	.	.	no	no	no
AMFR	ENSG00000159461	autocrine motility factor receptor [Source:HGNC Symbol;Acc:HGNC:463]	protein_coding	16:56361452-56425545:-1	102	1724	788	1153	674	2930	5227	5473	7106	1011	26188	43.338	25.185	23.238	26.586	34.961	24.689	43.64	45.306	68.14	50.746	30.406	0.81124	0.59982	0.48818	0.85701	0.51278	0.75893	0.79243	1.84058	1.00177	0.66152	1	Cluster 2 (early spermatid 2)	0.681	0.395	0.286	0.286	0.674	0	0	early spermatid	no	no	no
AMH	ENSG00000104899	anti-Mullerian hormone [Source:HGNC Symbol;Acc:HGNC:464]	protein_coding	19:2249309-2252073:1	102	21	9	35	27	28	43	90	385	152	892	1.476	25.185	0.283	0.304	1.061	0.989	0.417	0.373	1.121	2.749	4.571	1.1126	0.00693	0.00441	0.01339	0.01396	0.00548	0.00291	0.0106	0.03536	0.08306	1	Cluster 9 (Sertoli)	0.252	0.013	0.239	0.239	1.053	2.69e-148	1.36e-143	Sertoli	yes	no	no
AMHR2	ENSG00000135409	anti-Mullerian hormone receptor type 2 [Source:HGNC Symbol;Acc:HGNC:465]	protein_coding	12:53423855-53431672:1	78	346	25	38	15	34	52	94	116	9	807	1.335	19.259	4.664	0.843	1.152	0.549	0.506	0.451	1.17	0.828	0.271	0.7853	0.09821	0.01338	0.01881	0.00803	0.00888	0.00643	0.01415	0.01091	0.00733	0	.	.	.	.	.	.	.	.	.	no	no	no
AMIGO1	ENSG00000181754	adhesion molecule with Ig like domain 1 [Source:HGNC Symbol;Acc:HGNC:20824]	protein_coding	1:109504178-109509738:-1	0	148	25	68	36	83	56	18	24	4	462	0.765	0	1.995	0.843	2.062	1.319	1.236	0.485	0.224	0.171	0.12	0	0.04006	0.01216	0.02804	0.0183	0.01086	0.00402	0.0025	0.00222	0.00227	0	.	.	.	.	.	.	.	.	.	no	no	no
AMIGO2	ENSG00000139211	adhesion molecule with Ig like domain 2 [Source:HGNC Symbol;Acc:HGNC:24073]	protein_coding	12:47075707-47079959:-1	51	115	378	221	28	20	28	52	150	12	1055	1.746	12.593	1.55	12.753	6.701	1.026	0.298	0.243	0.647	1.071	0.361	0.36482	0.02833	0.1876	0.1	0.01276	0.00479	0.00278	0.00909	0.01248	0.00927	0	.	.	.	.	.	.	.	.	.	no	no	no
AMIGO3	ENSG00000176020	adhesion molecule with Ig like domain 3 [Source:HGNC Symbol;Acc:HGNC:24075]	protein_coding	3:49716829-49719684:-1	0	2	0	0	0	1	2	0	0	0	5	0.008	0	0.027	0	0	0	0.015	0.017	0	0	0	0	0.00037	0	0	0	4e-05	0.00011	0	0	0	0	.	.	.	.	.	.	.	.	.	no	no	no
AMMECR1	ENSG00000101935	AMMECR nuclear protein 1 [Source:HGNC Symbol;Acc:HGNC:467]	protein_coding	X:110194186-110440318:-1	3	636	109	203	133	71	137	107	95	13	1507	2.494	0.741	8.573	3.677	6.155	4.872	1.057	1.187	1.332	0.678	0.391	0.01704	0.2037	0.05514	0.07954	0.0724	0.00966	0.01063	0.015	0.00916	0.00932	0	.	.	.	.	.	.	.	.	.	no	no	no
AMMECR1-IT1	ENSG00000224142	AMMECR1 intronic transcript 1 [Source:HGNC Symbol;Acc:HGNC:41306]	lncRNA	X:110305420-110307221:-1	0	10	9	10	7	9	16	17	4	0	82	0.136	0	0.135	0.304	0.303	0.256	0.134	0.139	0.212	0.029	0	0	0.00289	0.00656	0.00313	0.00546	0.00172	0.00193	0.00191	0.0004	0	0	.	.	.	.	.	.	.	.	.	no	no	no
AMMECR1L	ENSG00000144233	AMMECR1 like [Source:HGNC Symbol;Acc:HGNC:28658]	protein_coding	2:127861630-127885967:-1	29	365	162	539	218	559	425	720	565	88	3670	6.073	7.16	4.92	5.466	16.343	7.985	8.326	3.684	8.964	4.035	2.647	0.21233	0.10185	0.07173	0.30923	0.12329	0.0729	0.03354	0.1142	0.0485	0.04321	0	.	.	.	.	.	.	.	.	.	no	no	no
AMN	ENSG00000166126	amnion associated transmembrane protein [Source:HGNC Symbol;Acc:HGNC:14604]	protein_coding	14:102922663-102933596:1	2	27	5	255	251	639	683	176	216	36	2290	3.79	0.494	0.364	0.169	7.732	9.194	9.517	5.92	2.191	1.543	1.083	0.01372	0.00789	0.00345	0.11494	0.16587	0.06701	0.04226	0.01598	0.01958	0.01861	0	.	.	.	.	.	.	.	.	.	no	no	no
AMN1	ENSG00000151743	antagonist of mitotic exit network 1 homolog [Source:HGNC Symbol;Acc:HGNC:27281]	protein_coding	12:31671142-31729121:-1	25	343	195	410	479	4695	7007	4395	1970	219	19738	32.664	6.173	4.623	6.579	12.432	17.546	69.929	60.735	54.719	14.068	6.586	0.1679	0.10775	0.10224	0.21666	0.36598	1.917	1.27219	1.27949	0.21132	0.12486	2	Cluster 4 (spermatocyte) | Cluster 1 (early spermatid 1) | Cluster 2 (early spermatid 2)	0.699 | 0.607 | 0.547	0.28 | 0.26 | 0.293	0.419 | 0.347 | 0.254	0.419	0.884 | 0.505 | 0.470	0.000e+00 | 0.000e+00 | 0.000e+00	0.000e+00 | 0.000e+00 | 0.000e+00	.	no	no	no
AMOT	ENSG00000126016	angiomotin [Source:HGNC Symbol;Acc:HGNC:17810]	protein_coding	X:112774503-112840831:-1	6	244	84	178	56	6	19	10	32	3	638	1.056	1.481	3.289	2.834	5.397	2.051	0.089	0.165	0.125	0.229	0.09	0.03545	0.07083	0.03627	0.08934	0.02751	0.00033	0.00222	0.00168	0.00286	0.00219	0	.	.	.	.	.	.	.	.	.	no	no	no
AMOTL1	ENSG00000166025	angiomotin like 1 [Source:HGNC Symbol;Acc:HGNC:17811]	protein_coding	11:94706431-94876748:1	12	598	430	263	357	920	4411	2951	2630	166	12738	21.08	2.963	8.06	14.507	7.975	13.077	13.703	38.234	36.741	18.782	4.992	0.09825	0.17406	0.2173	0.13499	0.23618	0.1223	0.57171	0.59718	0.28303	0.09107	1	Cluster 1 (early spermatid 1) | Cluster 2 (early spermatid 2)	0.382 | 0.367	0.17 | 0.187	0.212 | 0.180	0.212	0.313 | 0.318	0.000e+00 | 4.028e-267	0.000e+00 | 2.038e-262	early spermatid	no	no	no
AMOTL2	ENSG00000114019	angiomotin like 2 [Source:HGNC Symbol;Acc:HGNC:17812]	protein_coding	3:134355347-134375479:-1	19	485	468	145	21	26	523	166	319	75	2247	3.719	4.691	6.537	15.789	4.397	0.769	0.387	4.533	2.067	2.278	2.256	0.09634	0.14737	0.22478	0.0628	0.01037	0.00365	0.03591	0.01384	0.02603	0.03871	0	.	.	.	.	.	.	.	.	.	no	no	no
AMPD1	ENSG00000116748	adenosine monophosphate deaminase 1 [Source:HGNC Symbol;Acc:HGNC:468]	protein_coding	1:114673090-114695618:-1	0	3	2	21	3	5	8	37	77	5	161	0.266	0	0.04	0.067	0.637	0.11	0.074	0.069	0.461	0.55	0.15	0	0.00082	0.00055	0.00695	0.00213	0.00029	0.00044	0.0043	0.00527	0.00557	0	.	.	.	.	.	.	.	.	.	no	no	no
AMPD2	ENSG00000116337	adenosine monophosphate deaminase 2 [Source:HGNC Symbol;Acc:HGNC:469]	protein_coding	1:109616104-109632051:1	13	541	155	321	107	305	260	97	93	18	1910	3.161	3.21	7.292	5.229	9.733	3.919	4.543	2.254	1.208	0.664	0.541	0.08897	0.15411	0.07842	0.13565	0.05474	0.03779	0.01888	0.01283	0.00695	0.01159	0	.	.	.	.	.	.	.	.	.	no	no	no
AMPD3	ENSG00000133805	adenosine monophosphate deaminase 3 [Source:HGNC Symbol;Acc:HGNC:470]	protein_coding	11:10308313-10507579:1	17	50	51	54	33	21	81	338	1008	47	1700	2.813	4.198	0.674	1.721	1.637	1.209	0.313	0.702	4.208	7.198	1.414	0.09363	0.01522	0.03485	0.02392	0.01906	0.00262	0.00759	0.03411	0.06878	0.02389	0	.	.	.	.	.	.	.	.	.	no	no	no
AMPH	ENSG00000078053	amphiphysin [Source:HGNC Symbol;Acc:HGNC:471]	protein_coding	7:38383704-38631420:-1	3	267	43	343	78	355	675	340	459	79	2642	4.372	0.741	3.599	1.451	10.4	2.857	5.287	5.851	4.233	3.278	2.376	0.01681	0.07921	0.02348	0.16931	0.04097	0.0601	0.06333	0.03932	0.0404	0.05557	0	.	.	.	.	.	.	.	.	.	no	no	no
AMT	ENSG00000145020	aminomethyltransferase [Source:HGNC Symbol;Acc:HGNC:473]	protein_coding	3:49416778-49422685:-1	0	155	90	137	43	110	70	94	20	2	721	1.193	0	2.089	3.036	4.154	1.575	1.638	0.607	1.17	0.143	0.06	0	0.04979	0.06639	0.05983	0.02428	0.01031	0.00468	0.01315	0.00355	0.00031	0	.	.	.	.	.	.	.	.	.	no	no	no
AMTN	ENSG00000187689	amelotin [Source:HGNC Symbol;Acc:HGNC:33188]	protein_coding	4:70518569-70532743:1	0	1	0	20	0	23	25	3	1	0	73	0.121	0	0.013	0	0.606	0	0.343	0.217	0.037	0.007	0	0	0.00017	0	0.00669	0	0.00216	0.00115	0.00054	2e-05	0	0	.	.	.	.	.	.	.	.	.	no	no	no
AMY1A	ENSG00000237763	amylase alpha 1A [Source:HGNC Symbol;Acc:HGNC:474]	protein_coding	1:103655760-103664554:1	0	1	0	2	0	2	90	21	17	3	136	0.225	0	0.013	0	0.061	0	0.03	0.78	0.261	0.121	0.09	0	7e-05	0	0.00037	0	0.00011	0.00513	0.00189	0.0019	0.00275	0	.	.	.	.	.	.	.	.	.	no	no	no
AMY1C	ENSG00000187733	amylase alpha 1C [Source:HGNC Symbol;Acc:HGNC:476]	protein_coding	1:103745323-103758726:1	0	0	0	0	0	1	7	3	0	0	11	0.018	0	0	0	0	0	0.015	0.061	0.037	0	0	0	0	0	0	0	3e-05	0.00023	0.00024	0	0	0	.	.	.	.	.	.	.	.	.	no	no	no
AMY2A	ENSG00000243480	amylase alpha 2A [Source:HGNC Symbol;Acc:HGNC:477]	protein_coding	1:103617427-103625780:1	0	3	0	17	0	6	35	19	10	1	91	0.151	0	0.04	0	0.515	0	0.089	0.303	0.237	0.071	0.03	0	0.00118	0	0.00806	0	0.00124	0.00199	0.0015	0.00058	0.00078	0	.	.	.	.	.	.	.	.	.	no	no	no
AMY2B	ENSG00000240038	amylase alpha 2B [Source:HGNC Symbol;Acc:HGNC:478]	protein_coding	1:103553815-103579534:1	1	173	78	89	54	97	283	125	84	17	1001	1.657	0.247	2.332	2.632	2.699	1.978	1.445	2.453	1.556	0.6	0.511	0.00184	0.05382	0.0448	0.03595	0.02974	0.01065	0.02747	0.01631	0.00711	0.00996	0	.	.	.	.	.	.	.	.	.	no	no	no
AMZ1	ENSG00000174945	archaelysin family metallopeptidase 1 [Source:HGNC Symbol;Acc:HGNC:22231]	protein_coding	7:2679522-2775500:1	2	86	23	69	39	45	289	1565	690	47	2855	4.725	0.494	1.159	0.776	2.092	1.429	0.67	2.505	19.485	4.928	1.414	0.01087	0.02313	0.00851	0.0344	0.01657	0.00771	0.0235	0.25643	0.05085	0.02065	0	.	.	.	.	.	.	.	.	.	no	no	no
AMZ2	ENSG00000196704	archaelysin family metallopeptidase 2 [Source:HGNC Symbol;Acc:HGNC:28041]	protein_coding	17:68205481-68257712:1	110	1445	637	1699	1407	5852	9644	5498	11121	2682	40095	66.353	27.16	19.477	21.491	51.516	51.538	87.161	83.592	68.451	79.419	80.662	0.93849	0.48038	0.40003	1.30421	1.53441	4.24662	3.70514	2.08214	2.91075	3.75527	3	Cluster 4 (spermatocyte) | Cluster 1 (early spermatid 1) | Cluster 5 (late spermatid 2)	0.872 | 0.836 | 0.807	0.638 | 0.623 | 0.655	0.234 | 0.213 | 0.152	0.234	0.646 | 0.515 | 0.445	0.000e+00 | 0.000e+00 | 2.021e-132	0.000e+00 | 0.000e+00 | 1.022e-127	.	no	no	no
AMZ2P1	ENSG00000214174	archaelysin family metallopeptidase 2 pseudogene 1 [Source:HGNC Symbol;Acc:HGNC:26491]	transcribed_unprocessed_pseudogene	17:64966550-64975576:-1	118	1330	421	608	874	4570	8357	4966	9046	1886	32176	53.248	29.136	17.927	14.204	18.435	32.015	68.067	72.437	61.828	64.6	56.722	1.02383	0.44273	0.2715	0.33878	0.72284	1.56566	1.96366	1.54432	1.64498	1.81568	2	Cluster 1 (early spermatid 1) | Cluster 5 (late spermatid 2)	0.724 | 0.567	0.487 | 0.53	0.237 | 0.037	0.237	0.418 | 0.270	0.000e+00 | 3.907e-56	0.000e+00 | 1.976e-51	.	no	no	no
AMZ2P2	ENSG00000219249	archaelysin family metallopeptidase 2 pseudogene 2 [Source:HGNC Symbol;Acc:HGNC:38072]	processed_pseudogene	6:158725747-158726803:-1	0	0	0	3	0	0	2	5	0	0	10	0.017	0	0	0	0.091	0	0	0.017	0.062	0	0	0	0	0	0.00042	0	0	6e-05	0.00066	0	0	0	.	.	.	.	.	.	.	.	.	no	no	no
AMZ2P3	ENSG00000233807	AMZ2 pseudogene 3 [Source:HGNC Symbol;Acc:HGNC:54911]	processed_pseudogene	X:27218131-27218678:-1	0	0	0	1	2	0	0	1	0	0	4	0.007	0	0	0	0.03	0.073	0	0	0.012	0	0	0	0	0	0.00013	0.00067	0	0	3e-05	0	0	0	.	.	.	.	.	.	.	.	.	no	no	no
ANAPC1	ENSG00000153107	anaphase promoting complex subunit 1 [Source:HGNC Symbol;Acc:HGNC:19988]	protein_coding	2:111611639-111884690:-1	17	329	223	550	393	526	3463	598	358	23	6480	10.724	4.198	4.435	7.524	16.677	14.396	7.834	30.016	7.445	2.557	0.692	0.1267	0.09226	0.09881	0.27886	0.24653	0.06971	0.33991	0.07434	0.03652	0.01303	1	Cluster 1 (early spermatid 1)	0.3	0.062	0.238	0.238	0.302	0	0	early spermatid	no	no	no
ANAPC10	ENSG00000164162	anaphase promoting complex subunit 10 [Source:HGNC Symbol;Acc:HGNC:24077]	protein_coding	4:144831908-145098541:-1	55	1194	568	1138	1376	4245	6263	1802	845	66	17552	29.047	13.58	16.094	19.163	34.506	50.403	63.226	54.286	22.435	6.034	1.985	0.36918	0.38851	0.32023	0.63242	1.44447	1.26798	0.97293	0.25048	0.08924	0.04175	3	Cluster 8 (diff SPG/early meiosis) | Cluster 4 (spermatocyte) | Cluster 1 (early spermatid 1)	0.504 | 0.632 | 0.543	0.28 | 0.248 | 0.231	0.224 | 0.384 | 0.312	0.384	0.699 | 0.637 | 0.446	7.432e-263 | 0.000e+00 | 0.000e+00	3.759e-258 | 0.000e+00 | 0.000e+00	.	no	no	no
ANAPC10P1	ENSG00000213735	anaphase promoting complex subunit 10 pseudogene 1 [Source:HGNC Symbol;Acc:HGNC:33976]	processed_pseudogene	1:52253621-52254176:1	0	30	4	12	10	3	3	0	1	0	63	0.104	0	0.404	0.135	0.364	0.366	0.045	0.026	0	0.007	0	0	0.00816	0.00139	0.00544	0.00427	0.0002	0.00034	0	2e-05	0	0	.	.	.	.	.	.	.	.	.	no	no	no
ANAPC11	ENSG00000141552	anaphase promoting complex subunit 11 [Source:HGNC Symbol;Acc:HGNC:14452]	protein_coding	17:81890790-81900991:1	239	4204	1572	2583	2290	6315	10112	5320	10979	2739	46353	76.709	59.012	56.665	53.036	78.32	83.883	94.057	87.648	66.235	78.405	82.376	3.0537	2.03714	1.38476	3.49219	4.98419	7.22792	4.7992	1.90762	2.85246	4.2703	3	Cluster 8 (diff SPG/early meiosis) | Cluster 4 (spermatocyte) | Cluster 1 (early spermatid 1)	0.839 | 0.941 | 0.876	0.764 | 0.745 | 0.741	0.075 | 0.196 | 0.135	0.196	0.393 | 0.980 | 0.416	8.317e-112 | 0.000e+00 | 0.000e+00	4.207e-107 | 0.000e+00 | 0.000e+00	.	no	no	no
ANAPC13	ENSG00000129055	anaphase promoting complex subunit 13 [Source:HGNC Symbol;Acc:HGNC:24540]	protein_coding	3:134477706-134486716:-1	112	1775	895	1248	1227	1807	3023	1780	2981	280	15128	25.035	27.654	23.925	30.196	37.841	44.945	26.914	26.203	22.161	21.288	8.421	1.02011	0.60081	0.5732	0.76167	1.11229	0.28529	0.28108	0.24335	0.29269	0.1602	3	Cluster 9 (Sertoli) | Cluster 6 (undiff SPG) | Cluster 8 (diff SPG/early meiosis)	0.277 | 0.378 | 0.449	0.25 | 0.243 | 0.241	0.027 | 0.135 | 0.208	0.208	0.539 | 0.359 | 0.634	8.427e-45 | 4.798e-113 | 3.393e-264	4.262e-40 | 2.427e-108 | 1.716e-259	.	yes	no	no
ANAPC15	ENSG00000110200	anaphase promoting complex subunit 15 [Source:HGNC Symbol;Acc:HGNC:24531]	protein_coding	11:72106378-72112780:-1	18	475	334	1480	1327	1670	1498	600	476	47	7925	13.115	4.444	6.402	11.269	44.876	48.608	24.873	12.984	7.47	3.399	1.414	0.12887	0.13554	0.1795	1.20009	1.33773	0.35159	0.14687	0.09581	0.04754	0.02182	2	Cluster 6 (undiff SPG) | Cluster 8 (diff SPG/early meiosis)	0.449 | 0.486	0.113 | 0.114	0.336 | 0.372	0.372	0.888 | 0.971	0.000e+00 | 0.000e+00	0.000e+00 | 0.000e+00	.	no	no	no
ANAPC16	ENSG00000166295	anaphase promoting complex subunit 16 [Source:HGNC Symbol;Acc:HGNC:26976]	protein_coding	10:72216000-72235860:1	243	4482	1918	2034	1528	5245	6624	2356	1996	179	26605	44.028	60	60.412	64.71	61.674	55.971	78.12	57.415	29.333	14.254	5.383	2.96415	2.32956	2.04586	1.74405	1.57763	2.48331	1.09482	0.3462	0.23269	0.12713	6	Cluster 9 (Sertoli) | Cluster 3 (myoid/Leydig) | Cluster 7 (endothelia/macrophage) | Cluster 6 (undiff SPG) | Cluster 8 (diff SPG/early meiosis) | Cluster 4 (spermatocyte)	0.6 | 0.604 | 0.647 | 0.617 | 0.56 | 0.781	0.439 | 0.417 | 0.43 | 0.43 | 0.435 | 0.398	0.161 | 0.187 | 0.217 | 0.187 | 0.125 | 0.383	0.383	0.881 | 0.734 | 0.523 | 0.365 | 0.265 | 0.801	1.248e-60 | 0.000e+00 | 2.776e-166 | 6.493e-111 | 2.385e-46 | 0.000e+00	6.310e-56 | 0.000e+00 | 1.404e-161 | 3.284e-106 | 1.206e-41 | 0.000e+00	.	yes	yes	yes
ANAPC1P1	ENSG00000233673	anaphase promoting complex subunit 1 pseudogene 1 [Source:HGNC Symbol;Acc:HGNC:44150]	transcribed_unprocessed_pseudogene	2:86861825-86912978:1	0	6	3	27	5	16	33	15	8	0	113	0.187	0	0.081	0.101	0.819	0.183	0.238	0.286	0.187	0.057	0	0	0.00189	0.00152	0.00938	0.00173	0.00101	0.00232	0.00197	0.0005	0	0	.	.	.	.	.	.	.	.	.	no	no	no
ANAPC1P2/ENSG00000285793	ENSG00000285793	ANAPC1 pseudogene 2 [Source:NCBI gene (formerly Entrezgene);Acc:285074]	lncRNA	2:87030675-87076429:-1	3	30	35	46	32	44	109	50	128	28	505	0.836	0.741	0.404	1.181	1.395	1.172	0.655	0.945	0.623	0.914	0.842	0.02498	0.00744	0.01144	0.02649	0.01396	0.00402	0.00555	0.004	0.00805	0.01261	0	.	.	.	.	.	.	.	.	.	no	no	no
ANAPC1P6	ENSG00000235486	ANAPC1 pseudogene 6 [Source:HGNC Symbol;Acc:HGNC:54712]	unprocessed_pseudogene	2:106369724-106378247:1	0	0	0	1	0	0	0	0	0	0	1	0.002	0	0	0	0.03	0	0	0	0	0	0	0	0	0	0.00031	0	0	0	0	0	0	0	.	.	.	.	.	.	.	.	.	no	no	no
ANAPC2	ENSG00000176248	anaphase promoting complex subunit 2 [Source:HGNC Symbol;Acc:HGNC:19989]	protein_coding	9:137174784-137188560:-1	16	563	281	971	799	2842	3962	1636	2066	367	13503	22.346	3.951	7.589	9.48	29.442	29.267	42.329	34.342	20.369	14.754	11.038	0.09543	0.16852	0.1278	0.51483	0.5813	0.56376	0.41953	0.22278	0.17376	0.20233	2	Cluster 8 (diff SPG/early meiosis) | Cluster 4 (spermatocyte)	0.293 | 0.423	0.22 | 0.198	0.073 | 0.225	0.225	0.291 | 0.296	2.089e-80 | 0.000e+00	1.057e-75 | 0.000e+00	.	no	no	no
ANAPC4	ENSG00000053900	anaphase promoting complex subunit 4 [Source:HGNC Symbol;Acc:HGNC:19990]	protein_coding	4:25377263-25418498:1	24	559	300	462	521	556	470	390	402	36	3720	6.156	5.926	7.535	10.121	14.008	19.084	8.281	4.074	4.856	2.871	1.083	0.16403	0.17956	0.14361	0.24629	0.34965	0.07479	0.03401	0.0508	0.03251	0.01788	0	.	.	.	.	.	.	.	.	.	no	no	no
ANAPC5	ENSG00000089053	anaphase promoting complex subunit 5 [Source:HGNC Symbol;Acc:HGNC:15713]	protein_coding	12:121308245-121399896:-1	86	2515	1032	1498	1324	1564	2409	1188	1432	246	13294	22	21.235	33.899	34.818	45.421	48.498	23.295	20.881	14.791	10.226	7.398	0.69246	0.94502	0.70952	1.04173	1.39444	0.26682	0.20676	0.14906	0.13117	0.12556	4	Cluster 3 (myoid/Leydig) | Cluster 7 (endothelia/macrophage) | Cluster 6 (undiff SPG) | Cluster 8 (diff SPG/early meiosis)	0.339 | 0.348 | 0.454 | 0.485	0.203 | 0.213 | 0.206 | 0.207	0.136 | 0.135 | 0.248 | 0.278	0.278	0.553 | 0.303 | 0.581 | 0.822	0.000e+00 | 6.596e-70 | 1.841e-263 | 0.000e+00	0.000e+00 | 3.336e-65 | 9.312e-259 | 0.000e+00	.	no	yes	yes
ANAPC7	ENSG00000196510	anaphase promoting complex subunit 7 [Source:HGNC Symbol;Acc:HGNC:17380]	protein_coding	12:110372900-110403730:-1	42	736	366	864	892	3407	1804	490	533	86	9220	15.258	10.37	9.92	12.348	26.198	32.674	50.745	15.637	6.101	3.806	2.586	0.26402	0.21158	0.1869	0.5059	0.72079	0.7648	0.16902	0.06715	0.05342	0.05321	3	Cluster 6 (undiff SPG) | Cluster 8 (diff SPG/early meiosis) | Cluster 4 (spermatocyte)	0.262 | 0.327 | 0.507	0.146 | 0.144 | 0.108	0.116 | 0.183 | 0.399	0.399	0.300 | 0.501 | 0.590	8.103e-87 | 1.443e-180 | 0.000e+00	4.098e-82 | 7.297e-176 | 0.000e+00	.	no	no	no
ANG	ENSG00000214274	angiogenin [Source:HGNC Symbol;Acc:HGNC:483]	protein_coding	14:20684177-20698971:1	50	1151	327	42	35	30	48	26	66	7	1782	2.949	12.346	15.514	11.032	1.273	1.282	0.447	0.416	0.324	0.471	0.211	0.39537	0.38969	0.18185	0.01874	0.02167	0.00643	0.00487	0.00372	0.00668	0.00398	0	.	.	.	.	.	.	.	.	.	no	no	no
ANGEL1	ENSG00000013523	angel homolog 1 [Source:HGNC Symbol;Acc:HGNC:19961]	protein_coding	14:76786009-76826246:-1	29	186	228	324	175	1525	2857	2436	2252	595	10607	17.553	7.16	2.507	7.692	9.824	6.41	22.714	24.764	30.329	16.082	17.895	0.20108	0.0503	0.09752	0.14108	0.09564	0.21608	0.25596	0.37208	0.19381	0.35607	0	.	.	.	.	.	.	.	.	.	no	no	no
ANGEL2	ENSG00000174606	angel homolog 2 [Source:HGNC Symbol;Acc:HGNC:30534]	protein_coding	1:212992182-213015867:-1	29	687	408	560	491	304	1780	1063	241	25	5588	9.248	7.16	9.26	13.765	16.98	17.985	4.528	15.429	13.235	1.721	0.752	0.2318	0.20472	0.20842	0.30053	0.3243	0.0445	0.20284	0.23819	0.02477	0.01547	0	.	.	.	.	.	.	.	.	.	no	no	no
ANGPT1	ENSG00000154188	angiopoietin 1 [Source:HGNC Symbol;Acc:HGNC:484]	protein_coding	8:107249482-107498055:-1	12	214	32	283	109	163	286	698	149	5	1951	3.229	2.963	2.884	1.08	8.581	3.993	2.428	2.479	8.69	1.064	0.15	0.09279	0.07093	0.01587	0.14926	0.06451	0.01892	0.02112	0.10811	0.01346	0.0027	0	.	.	.	.	.	.	.	.	.	no	no	no
ANGPT2	ENSG00000091879	angiopoietin 2 [Source:HGNC Symbol;Acc:HGNC:485]	protein_coding	8:6499632-6563409:-1	5	573	799	267	127	569	579	544	317	26	3806	6.299	1.235	7.723	26.957	8.096	4.652	8.475	5.019	6.773	2.264	0.782	0.01949	0.21649	1.15113	0.11411	0.07395	0.06157	0.04599	0.07423	0.02476	0.01413	1	Cluster 7 (endothelia/macrophage)	0.27	0.052	0.218	0.218	1.005	0	0	endothelia/macrophage	no	no	yes
ANGPT4	ENSG00000101280	angiopoietin 4 [Source:HGNC Symbol;Acc:HGNC:487]	protein_coding	20:869900-916334:-1	3	124	56	84	53	207	302	548	466	71	1914	3.167	0.741	1.671	1.889	2.547	1.941	3.083	2.618	6.823	3.328	2.135	0.01438	0.03649	0.02717	0.03626	0.03072	0.0235	0.02204	0.07769	0.03246	0.03826	0	.	.	.	.	.	.	.	.	.	no	no	no
ANGPTL1	ENSG00000116194	angiopoietin like 1 [Source:HGNC Symbol;Acc:HGNC:489]	protein_coding	1:178849535-178871077:-1	8	4176	61	71	45	118	110	110	92	22	4813	7.965	1.975	56.288	2.058	2.153	1.648	1.758	0.953	1.37	0.657	0.662	0.04426	2.7266	0.04463	0.03094	0.0215	0.01312	0.00735	0.01909	0.0146	0.01358	1	Cluster 3 (myoid/Leydig)	0.563	0.012	0.551	0.551	1.874	0	0	myoid/Leydig	no	yes	no
ANGPTL2	ENSG00000136859	angiopoietin like 2 [Source:HGNC Symbol;Acc:HGNC:490]	protein_coding	9:127087348-127122635:-1	2	776	115	10	10	253	139	114	128	6	1553	2.57	0.494	10.46	3.88	0.303	0.366	3.768	1.205	1.419	0.914	0.18	0.01308	0.25872	0.0539	0.00293	0.00594	0.04543	0.01113	0.01454	0.00785	0.0038	0	.	.	.	.	.	.	.	.	.	no	no	no
ANGPTL3	ENSG00000132855	angiopoietin like 3 [Source:HGNC Symbol;Acc:HGNC:491]	protein_coding	1:62597520-62606313:1	0	5	1	8	3	0	1	3	5	0	26	0.043	0	0.067	0.034	0.243	0.11	0	0.009	0.037	0.036	0	0	0.00121	0.00013	0.00294	0.00093	0	6e-05	0.00099	0.00039	0	0	.	.	.	.	.	.	.	.	.	no	no	no
ANGPTL4	ENSG00000167772	angiopoietin like 4 [Source:HGNC Symbol;Acc:HGNC:16039]	protein_coding	19:8363289-8374370:1	8	3216	156	468	64	84	119	55	91	13	4274	7.073	1.975	43.348	5.263	14.19	2.344	1.251	1.031	0.685	0.65	0.391	0.0612	1.63019	0.08769	0.22188	0.03906	0.01615	0.01227	0.00977	0.01257	0.00714	1	Cluster 3 (myoid/Leydig)	0.433	0.02	0.413	0.413	1.351	0	0	myoid/Leydig	no	yes	no
ANGPTL5	ENSG00000187151	angiopoietin like 5 [Source:HGNC Symbol;Acc:HGNC:19705]	protein_coding	11:101890674-101916522:-1	1	580	6	50	25	85	190	161	27	3	1128	1.867	0.247	7.818	0.202	1.516	0.916	1.266	1.647	2.004	0.193	0.09	0.00741	0.20345	0.0023	0.02078	0.01221	0.01075	0.01225	0.01707	0.00279	0.00078	0	.	.	.	.	.	.	.	.	.	no	no	no
ANGPTL6	ENSG00000130812	angiopoietin like 6 [Source:HGNC Symbol;Acc:HGNC:23140]	protein_coding	19:10092338-10102678:-1	0	8	1	115	42	22	24	2	11	2	227	0.376	0	0.108	0.034	3.487	1.538	0.328	0.208	0.025	0.079	0.06	0	0.00235	0.00121	0.05115	0.02744	0.00321	0.00159	0.00011	0.00094	0.00158	0	.	.	.	.	.	.	.	.	.	no	no	no
ANGPTL7	ENSG00000171819	angiopoietin like 7 [Source:HGNC Symbol;Acc:HGNC:24078]	protein_coding	1:11189355-11195981:1	0	26	2	1	4	5	6	2	4	1	51	0.084	0	0.35	0.067	0.03	0.147	0.074	0.052	0.025	0.029	0.03	0	0.0122	0.00022	0.00033	0.00226	0.00073	0.00031	0.00024	0.00021	0.00052	0	.	.	.	.	.	.	.	.	.	no	no	no
ANGPTL8	ENSG00000130173	angiopoietin like 8 [Source:HGNC Symbol;Acc:HGNC:24933]	protein_coding	19:11237450-11241943:1	1	23	6	18	3	10	16	71	128	9	285	0.472	0.247	0.31	0.202	0.546	0.11	0.149	0.139	0.884	0.914	0.271	0.0032	0.00611	0.0046	0.00588	0.00176	0.00056	0.0012	0.00942	0.00844	0.00312	0	.	.	.	.	.	.	.	.	.	no	no	no
ANHX	ENSG00000227059	anomalous homeobox [Source:HGNC Symbol;Acc:HGNC:40024]	protein_coding	12:133218312-133235877:-1	2	18	5	682	486	33	46	21	39	7	1339	2.216	0.494	0.243	0.169	20.679	17.802	0.492	0.399	0.261	0.279	0.211	0.01517	0.0053	0.0037	0.36128	0.38686	0.00435	0.00485	0.00276	0.00403	0.004	0	.	.	.	.	.	.	.	.	.	no	no	no
ANK1	ENSG00000029534	ankyrin 1 [Source:HGNC Symbol;Acc:HGNC:492]	protein_coding	8:41653220-41896762:-1	1	21	184	125	19	7	70	223	241	17	908	1.503	0.247	0.283	6.208	3.79	0.696	0.104	0.607	2.776	1.721	0.511	0.00059	0.00461	0.08506	0.05615	0.00672	0.00028	0.0063	0.02978	0.01664	0.0097	0	.	.	.	.	.	.	.	.	.	no	no	no
ANK2	ENSG00000145362	ankyrin 2 [Source:HGNC Symbol;Acc:HGNC:493]	protein_coding	4:112818032-113384221:1	21	2335	280	660	281	780	4732	3588	2480	147	15304	25.326	5.185	31.473	9.447	20.012	10.293	11.618	41.016	44.671	17.71	4.421	0.13197	0.96502	0.14666	0.33647	0.18573	0.11639	0.63438	0.82069	0.25437	0.07612	2	Cluster 3 (myoid/Leydig) | Cluster 2 (early spermatid 2)	0.315 | 0.447	0.245 | 0.224	0.070 | 0.223	0.223	0.501 | 0.375	0.000e+00 | 0.000e+00	0.000e+00 | 0.000e+00	.	no	yes	no
[truncated: 49,674 more rows]
[truncated: 7 more columns]

## Sheet: Supplementary Table 6
Supplementary Table 6. Adult human SPG expression atlas (Seurat clustering resolution 0.3).
[truncated: 50,583 more rows]

## Sheet: Supplementary Table 7
Supplementary Table 7. Adult human SPG expression atlas (Seurat clustering resolution 1.1).
[truncated: 50,583 more rows]
[truncated: 6 more columns]

## Sheet: Supplementary Table 8
Supplementary Table 8. Adult human SPG expression atlas (Seurat clustering resolution 1.2).
[truncated: 50,583 more rows]
[truncated: 4 more columns]

[truncated: 14 more sheets: Supplementary Table 9, Supplementary Table 10, Supplementary Table 11, Supplementary Table 12, Supplementary Table 13, Supplementary Table 14, Supplementary Table 15, Supplementary Table 16, Supplementary Table 17, Supplementary Table 18, Supplementary Table 19, Supplementary Table 20, Supplementary Table 21, Supplementary Table 22]
